# Supplementary material for: Enhancing the classification of isolated theropod teeth using machine learning: a comparative study
Source: PeerJ journal article supplement (doi:10.7717/peerj.19116), 2025-03-26
Supplement: Data2.zip [file Data2.zip]

## Sheet: Data (2)
	Taxa (Genus)	TaxonToothtype	Clade	CladeToothtype	Specimen	Position	(Species)	Source	Formation	Locality	Region	Country	Age	Epoch	Maturity	Side	Position	Type	CBL	CBW	CH	AL	CBR	CHR	MCL	MCW	MCR	MDE	MSL	MEC	CTU	Transv. Undu.	Interdent. sulci	LAF	LIF	DMT	DDT	DLAT	DLIT	CA	CA2	MA	MC	MB	DA	DC	DB	MAVG	DAVG
1	Eoraptor	Eoraptor mesial	Basalmost Theropoda	Basalmost Theropoda	PVSJ 512	pmx2	lunensis	Hendrickx et al., 2015	Ischigualasto Formation	Valley of the Moon, Ischigualasto Provincial Park	San Juan Province	Argentina	Carnian	Late Triassic	Adult	Left	pmx2	Mesial	2.5	1.62	6.74	7	0.648	2.696	?	?	?	?	?	?	?	?	?	absent	absent	?	?	?	?	?	?	?	?	?	?	25	?	?	25
2	Eoraptor	Eoraptor mesial	Basalmost Theropoda	Basalmost Theropoda	PVSJ 512	pmx3	lunensis	Hendrickx et al., 2015	Ischigualasto Formation	Valley of the Moon, Ischigualasto Provincial Park	San Juan Province	Argentina	Carnian	Late Triassic	Adult	Left	pmx3	Mesial	1.97	2.35	5.92	6.38	?	3.00508	?	?	?	?	?	?	?	?	?	absent	absent	?	?	?	?	?	?					?
3	Eoraptor	Eoraptor mesial	Basalmost Theropoda	Basalmost Theropoda	PVSJ 512	pmx4	lunensis	Hendrickx et al., 2015	Ischigualasto Formation	Valley of the Moon, Ischigualasto Provincial Park	San Juan Province	Argentina	Carnian	Late Triassic	Adult	Left	pmx4	Mesial	2.19	1.74	6.52	6.08	?	2.97717	?	?	?	?	?	?	?	?	?	absent	absent	?	?	?	?	?	?					?
4	Eoraptor	Eoraptor mesial	Basalmost Theropoda	Basalmost Theropoda	PVSJ 512	pmx2	lunensis	Hendrickx et al., 2015	Ischigualasto Formation	Valley of the Moon, Ischigualasto Provincial Park	San Juan Province	Argentina	Carnian	Late Triassic	Adult	Right	pmx2	Mesial	2.17	1.56	5.01	5.4	?	2.30876	?	?	?	?	?	?	?	?	?	absent	absent	?	?	?	?	?	?					30
5	Eoraptor	Eoraptor mesial	Basalmost Theropoda	Basalmost Theropoda	PVSJ 512	pmx4	lunensis	Hendrickx et al., 2015	Ischigualasto Formation	Valley of the Moon, Ischigualasto Provincial Park	San Juan Province	Argentina	Carnian	Late Triassic	Adult	Right	pmx4	Mesial	2.08	1.61	4.17	4.88	?	2.00481	?	?	?	?	?	?	?	?	?	absent	absent	?	?	?	?	?	?					27.5
6	Eoraptor	Eoraptor lateral	Basalmost Theropoda	Basalmost Theropoda	PVSJ 512	mx2	lunensis	Hendrickx et al., 2015	Ischigualasto Formation	Valley of the Moon, Ischigualasto Provincial Park	San Juan Province	Argentina	Carnian	Late Triassic	Adult	Left	mx2	Lateral	2.69	1.82	5.55	5.67	?	2.0632	?	?	?	?	?	?	?	?	?	absent	absent	?	?	?	?	?	?					30
7	Eoraptor	Eoraptor lateral	Basalmost Theropoda	Basalmost Theropoda	PVSJ 512	mx4	lunensis	Hendrickx et al., 2015	Ischigualasto Formation	Valley of the Moon, Ischigualasto Provincial Park	San Juan Province	Argentina	Carnian	Late Triassic	Adult	Left	mx4	Lateral	3.03	1.48	5.65	6.54	?	1.86469	?	?	?	?	?	?	?	?	?	absent	absent	?	?	?	?	?	?					27.5
8	Eoraptor	Eoraptor lateral	Basalmost Theropoda	Basalmost Theropoda	PVSJ 512	mx5	lunensis	Hendrickx et al., 2015	Ischigualasto Formation	Valley of the Moon, Ischigualasto Provincial Park	San Juan Province	Argentina	Carnian	Late Triassic	Adult	Left	mx5	Lateral	3.56	1.69	5.48	6.89	?	1.53933	?	?	?	?	?	?	?	?	?	absent	absent	?	?	?	?	?	?		25			25
9	Eoraptor	Eoraptor lateral	Basalmost Theropoda	Basalmost Theropoda	PVSJ 512	mx9	lunensis	Hendrickx et al., 2015	Ischigualasto Formation	Valley of the Moon, Ischigualasto Provincial Park	San Juan Province	Argentina	Carnian	Late Triassic	Adult	Left	mx9	Lateral	2.49	1.75	5.11	6.43	?	2.05221	?	?	?	?	?	?	?	?	?	absent	absent	?	?	?	?	?	?		22.5			25
10	Eoraptor	Eoraptor lateral	Basalmost Theropoda	Basalmost Theropoda	PVSJ 512	mx10	lunensis	Hendrickx et al., 2015	Ischigualasto Formation	Valley of the Moon, Ischigualasto Provincial Park	San Juan Province	Argentina	Carnian	Late Triassic	Adult	Left	mx10	Lateral	2.7	1.22	4.58	6.02	?	1.6963	?	?	?	?	?	?	?	?	?	absent	absent	?	?	?	?	?	?		25			30
11	Eoraptor	Eoraptor lateral	Basalmost Theropoda	Basalmost Theropoda	PVSJ 512	mx11	lunensis	Hendrickx et al., 2015	Ischigualasto Formation	Valley of the Moon, Ischigualasto Provincial Park	San Juan Province	Argentina	Carnian	Late Triassic	Adult	Left	mx11	Lateral	2.32	1.42	2.34	3.5	?	1.00862	?	?	?	?	?	?	?	?	?	absent	absent	?	?	?	?	?	?		20			32.5
12	Eoraptor	Eoraptor lateral	Basalmost Theropoda	Basalmost Theropoda	PVSJ 512	mx17	lunensis	Young et al., 2019 (C.H. pers. measurements)	Ischigualasto Formation	Valley of the Moon, Ischigualasto Provincial Park	San Juan Province	Argentina	Carnian	Late Triassic	Adult	Right	mx17	Lateral	1.77	1.39	1.6	2.57	?	0.903955	?	?	?	?	?	?	?	?	?	absent	absent	?	?	?	?	?	?		?			27.5
13	Eoraptor	Eoraptor mesial	Basalmost Theropoda	Basalmost Theropoda	PVSJ 512	pm02	lunensis	Smith & Lamanna, 2006	Ischigualasto Formation	Valley of the Moon, Ischigualasto Provincial Park	San Juan Province	Argentina	Carnian	Late Triassic	Adult	Left	pm02	Mesial	2.88	1.85	7.15	7.39	0.642361	2.48264	?	?	?	?	?	?	?	?	?	?	?	?	?	?	?	57.21	0.296	?	?	?	35	37.5	/	?	36.3
14	Eoraptor	Eoraptor mesial	Basalmost Theropoda	Basalmost Theropoda	PVSJ 512	pm03	lunensis	Smith & Lamanna, 2006	Ischigualasto Formation	Valley of the Moon, Ischigualasto Provincial Park	San Juan Province	Argentina	Carnian	Late Triassic	Adult	Left	pm03	Mesial	1.98	1.48	5.73	5.86	0.747475	2.89394	?	?	?	?	?	?	?	?	?	?	?	?	?	?	?	47.79	0.215	?	?	?	/	30	/	?	30
15	Eoraptor	Eoraptor mesial	Basalmost Theropoda	Basalmost Theropoda	PVSJ 512	pm04	lunensis	Smith & Lamanna, 2006	Ischigualasto Formation	Valley of the Moon, Ischigualasto Provincial Park	San Juan Province	Argentina	Carnian	Late Triassic	Adult	Left	pm04	Mesial	1.89	1.55	6.12	6.2	0.820106	3.2381	?	?	?	?	?	?	?	?	?	?	?	?	?	?	?	51.6	0.303	?	?	?	/	/	/	?	30
16	Eoraptor	Eoraptor mesial	Basalmost Theropoda	Basalmost Theropoda	PVSJ 512	pm02	lunensis	Smith & Lamanna, 2006	Ischigualasto Formation	Valley of the Moon, Ischigualasto Provincial Park	San Juan Province	Argentina	Carnian	Late Triassic	Adult	Right	pm02	Mesial	2.32	1.8	5.19	5.44	0.775862	2.23707	?	?	?	?	?	?	?	?	?	?	?	?	?	?	?	41.21	0.055	?	?	?	/	35	/	?	35
17	Eoraptor	Eoraptor mesial	Basalmost Theropoda	Basalmost Theropoda	PVSJ 512	mx02	lunensis	Smith & Lamanna, 2006	Ischigualasto Formation	Valley of the Moon, Ischigualasto Provincial Park	San Juan Province	Argentina	Carnian	Late Triassic	Adult	Left	mx02	Mesial	2.11	1.51	5.71	5.91	0.71564	2.70616	?	?	?	?	?	?	?	?	?	?	?	?	?	?	?	46.81	0.205	?	?	?	37.5	/	/	?	37.5
18	Eoraptor	Eoraptor lateral	Basalmost Theropoda	Basalmost Theropoda	PVSJ 512	mx04	lunensis	Smith & Lamanna, 2006	Ischigualasto Formation	Valley of the Moon, Ischigualasto Provincial Park	San Juan Province	Argentina	Carnian	Late Triassic	Adult	Left	mx04	Lateral	3.04	1.97	6.58	7.61	0.648026	2.16447	?	?	?	?	?	?	?	?	?	?	?	?	?	?	?	49.46	0.12	?	?	?	30	30	/	?	30
19	Eoraptor	Eoraptor lateral	Basalmost Theropoda	Basalmost Theropoda	PVSJ 512	mx06	lunensis	Smith & Lamanna, 2006	Ischigualasto Formation	Valley of the Moon, Ischigualasto Provincial Park	San Juan Province	Argentina	Carnian	Late Triassic	Adult	Left	mx06	Lateral	2.9	1.74	5.44	6.38	0.6	1.87586	?	?	?	?	?	?	?	?	?	?	?	?	?	?	?	39.93	-0.067	?	?	?	/	30	/	?	30
20	Eoraptor	Eoraptor lateral	Basalmost Theropoda	Basalmost Theropoda	PVSJ 512	mx07	lunensis	Smith & Lamanna, 2006	Ischigualasto Formation	Valley of the Moon, Ischigualasto Provincial Park	San Juan Province	Argentina	Carnian	Late Triassic	Adult	Left	mx07	Lateral	2.71	1.58	6.17	6.75	0.583026	2.27675	?	?	?	?	?	?	?	?	?	?	?	?	?	?	?	48.36	0.131	?	?	?	32.5	25	35	?	30.8
21	Eoraptor	Eoraptor lateral	Basalmost Theropoda	Basalmost Theropoda	PVSJ 512	mx09	lunensis	Smith & Lamanna, 2006	Ischigualasto Formation	Valley of the Moon, Ischigualasto Provincial Park	San Juan Province	Argentina	Carnian	Late Triassic	Adult	Left	mx09	Lateral	2.67	1.82	4.99	6.12	0.681648	1.86891	?	?	?	?	?	?	?	?	?	?	?	?	?	?	?	30.78	-0.269	?	?	?	/	30	/	?	30
22	Eoraptor	Eoraptor lateral	Basalmost Theropoda	Basalmost Theropoda	PVSJ 512	mx10	lunensis	Smith & Lamanna, 2006	Ischigualasto Formation	Valley of the Moon, Ischigualasto Provincial Park	San Juan Province	Argentina	Carnian	Late Triassic	Adult	Left	mx10	Lateral	2.56	1.69	4.72	5.77	0.660156	1.84375	?	?	?	?	?	?	?	?	?	?	?	?	?	?	?	25.46	-0.423	?	?	?	/	30	/	?	30
23	Eoraptor	Eoraptor lateral	Basalmost Theropoda	Basalmost Theropoda	PVSJ 512	mx02	lunensis	Smith & Lamanna, 2006	Ischigualasto Formation	Valley of the Moon, Ischigualasto Provincial Park	San Juan Province	Argentina	Carnian	Late Triassic	Adult	Right	mx02	Lateral	2.94	1.87	5.32	6.2	0.636054	1.80952	?	?	?	?	?	?	?	?	?	?	?	?	?	?	?	39.26	-0.085	?	?	?	/	30	/	?	30
24	Eoraptor	Eoraptor lateral	Basalmost Theropoda	Basalmost Theropoda	PVSJ 512	mx04	lunensis	Smith & Lamanna, 2006	Ischigualasto Formation	Valley of the Moon, Ischigualasto Provincial Park	San Juan Province	Argentina	Carnian	Late Triassic	Adult	Right	mx04	Lateral	2.54	1.55	6.5	7.43	0.610236	2.55906	?	?	?	?	?	?	?	?	?	?	?	?	?	?	?	47.21	0.141	?	?	?	/	32.5	/	?	32.5
25	Eoraptor	Eoraptor lateral	Basalmost Theropoda	Basalmost Theropoda	PVSJ 512	mx05	lunensis	Smith & Lamanna, 2006	Ischigualasto Formation	Valley of the Moon, Ischigualasto Provincial Park	San Juan Province	Argentina	Carnian	Late Triassic	Adult	Right	mx05	Lateral	3.33	1.82	6.76	7.01	0.546547	2.03003	?	?	?	?	?	?	?	?	?	?	?	?	?	?	?	55.49	0.212	?	?	?	/	40	/	?	40
26	Eoraptor	Eoraptor lateral	Basalmost Theropoda	Basalmost Theropoda	PVSJ 512	mx07	lunensis	Smith & Lamanna, 2006	Ischigualasto Formation	Valley of the Moon, Ischigualasto Provincial Park	San Juan Province	Argentina	Carnian	Late Triassic	Adult	Right	mx07	Lateral	2.86	1.6	4.83	6.5	0.559441	1.68881	?	?	?	?	?	?	?	?	?	?	?	?	?	?	?	25.81	-0.442	?	?	?	/	32.5	/	?	32.5
27	Eoraptor	Eoraptor lateral	Basalmost Theropoda	Basalmost Theropoda	PVSJ 512	mx08	lunensis	Smith & Lamanna, 2006	Ischigualasto Formation	Valley of the Moon, Ischigualasto Provincial Park	San Juan Province	Argentina	Carnian	Late Triassic	Adult	Right	mx08	Lateral	2.8	1.5	4.71	5.97	0.535714	1.68214	?	?	?	?	?	?	?	?	?	?	?	?	?	?	?	26.19	-0.434	?	?	?	/	/	/	?	30
28	Ischisaurus	Ischisaurus	Basalmost Theropoda	Basalmost Theropoda	MACN 18.060	pmx1	cattoi	Hendrickx et al., 2015	Ischigualasto Formation	Valley of the Moon, Ischigualasto Provincial Park	San Juan Province	Argentina	Carnian	Late Triassic	?	Right	pmx1	Mesial	8.16	4.7	14.62	17.01	0.57598	1.79167	5.51	3.44	0.624319	/	/	/	0	absent	absent	absent	absent	?	?	?	?	?	?	/	/	/		?
29	Ischisaurus	Ischisaurus	Basalmost Theropoda	Basalmost Theropoda	MACN 18.060	pmx2	cattoi	Hendrickx et al., 2015	Ischigualasto Formation	Valley of the Moon, Ischigualasto Provincial Park	San Juan Province	Argentina	Carnian	Late Triassic	?	Right	pmx2	Mesial	7.48	4.43	14.5	17.14	0.592246	1.9385	5.53	4.15	0.750452	/	/	/	2 for 1 mm	well visible on the labial side	absent	absent	absent	?	?	?	?	?	?	/	/	/		20
30	Eodromaeus	Eodromaeus	Basalmost Theropoda	Basalmost Theropoda	PVSJ 561	mx3	murphi	Hendrickx et al., 2015	Ischigualasto Formation	Ischigualasto Provincial Park	San Juan Province	Argentina	Carnian	Late Triassic	Adult	Left	mx3	Lateral	3.61	1.59	9.67	10.89	0.440443	2.67867	2.65	1.44	0.543396	/	/	/	3 or 4 per 1 mm	visible on the lingual side	absent?	absent	absent	?	?	?	?	?	?					42.5
31	Coelophysis	Coelophysis mesial	Non-averostran Neotheropoda	Non-averostran Neotheropoda Mesial	CM 82931	pmx2	bauri	Hendrickx et al., 2015	Chinle Formation	Coelophysis quarry, Ghost Range	New Mexico	U.S.	Rhaetian	Late Triassic	Adult?	Left	pmx2	Mesial	1.7	0.54	4	4.8	0.317647	2.35294	1.2	?	?	/	/	/	0	absent	absent	absent	absent	?	?	?	?	?	?	/	/	/	/	/	/	/	/
32	Coelophysis	Coelophysis mesial	Non-averostran Neotheropoda	Non-averostran Neotheropoda Mesial	CM 82931	pmx3	bauri	Hendrickx et al., 2015	Chinle Formation	Coelophysis quarry, Ghost Range	New Mexico	U.S.	Rhaetian	Late Triassic	Adult?	Left	pmx3	Mesial	1.8	1.03	6.8	6.8	0.572222	3.77778	1.6	?	?	/	/	/	0	absent	absent	absent	absent	?	?	?	?	?	?	/	/	/	/	?	45	/	45
33	Coelophysis	Coelophysis lateral	Non-averostran Neotheropoda	Non-averostran Neotheropoda Lateral	CM 81765	mx1	bauri	Hendrickx et al., 2015	Chinle Formation	Coelophysis quarry, Ghost Range	New Mexico	U.S.	Rhaetian	Late Triassic	Adult?	Left	mx1	Lateral	3	1.49	8.2	8.7	0.496667	2.73333	2.4	?	?	/	/	/	0	absent	absent	absent	absent	?	?	?	?	?	?	/	/	/	60	50	?	/	55
34	Coelophysis	Coelophysis lateral	Non-averostran Neotheropoda	Non-averostran Neotheropoda Lateral	CM 81765	mx2	bauri	Hendrickx et al., 2015	Chinle Formation	Coelophysis quarry, Ghost Range	New Mexico	U.S.	Rhaetian	Late Triassic	Adult?	Left	mx2	Lateral	4.1	1.37	8.9	9.6	0.334146	2.17073	2.3	?	?	?	?	?	0	absent	absent	absent	absent	?	?	?	?	?	?	60	50	/	?	47	?	55	47
35	Coelophysis	Coelophysis lateral	Non-averostran Neotheropoda	Non-averostran Neotheropoda Lateral	CM 81765	mx4	bauri	Hendrickx et al., 2015	Chinle Formation	Coelophysis quarry, Ghost Range	New Mexico	U.S.	Rhaetian	Late Triassic	Adult?	Left	mx4	Lateral	4.4	1.63	11.6	12.3	0.370455	2.63636	4.1	?	?	?	?	?	0	absent	absent	absent	absent	?	?	?	?	?	?	50	40	/	?	40	40	45	40
36	Coelophysis	Coelophysis lateral	Non-averostran Neotheropoda	Non-averostran Neotheropoda Lateral	CM 81765	mx6	bauri	Hendrickx et al., 2015	Chinle Formation	Coelophysis quarry, Ghost Range	New Mexico	U.S.	Rhaetian	Late Triassic	Adult?	Left	mx6	Lateral	5.5	1.71	9.7	10.8	0.310909	1.76364	3.1	?	?	?	?	?	0	absent	absent	absent	absent	?	?	?	?	?	?	45	40	/	42.5	40	32.5	42.5	38.33
37	Coelophysis	Coelophysis lateral	Non-averostran Neotheropoda	Non-averostran Neotheropoda Lateral	CM 81765	mx8	bauri	Hendrickx et al., 2015	Chinle Formation	Coelophysis quarry, Ghost Range	New Mexico	U.S.	Rhaetian	Late Triassic	Adult?	Left	mx8	Lateral	5.9	1.79	9.3	13.2	0.30339	1.57627	2.8	?	?	?	?	?	0	absent	absent	absent	absent	?	?	?	?	?	?	42.5	40	/	?	40	35	41.25	37.5
38	Coelophysis	Coelophysis lateral	Non-averostran Neotheropoda	Non-averostran Neotheropoda Lateral	CM 81765	mx9	bauri	Hendrickx et al., 2015	Chinle Formation	Coelophysis quarry, Ghost Range	New Mexico	U.S.	Rhaetian	Late Triassic	Adult?	Left	mx9	Lateral	5.4	1.74	8.6	11.6	0.322222	1.59259	2.9	?	?	?	?	?	0	absent	absent	absent	absent	?	?	?	?	?	?	50	40	/	45	?	?	45	45
39	Coelophysis	Coelophysis lateral	Non-averostran Neotheropoda	Non-averostran Neotheropoda Lateral	CM 81765	mx11	bauri	Hendrickx et al., 2015	Chinle Formation	Coelophysis quarry, Ghost Range	New Mexico	U.S.	Rhaetian	Late Triassic	Adult?	Left	mx11	Lateral	5.4	1.85	7.5	10.1	0.342593	1.38889	3.7	?	?	?	?	?	0	absent	absent	absent	absent	?	?	?	?	?	?	45	40	/	?	35	40	42.5	37.5
40	Coelophysis	Coelophysis lateral	Non-averostran Neotheropoda	Non-averostran Neotheropoda Lateral	CM 81765	mx13	bauri	Hendrickx et al., 2015	Chinle Formation	Coelophysis quarry, Ghost Range	New Mexico	U.S.	Rhaetian	Late Triassic	Adult?	Left	mx13	Lateral	4.7	1.58	5.5	7.8	0.33617	1.17021	3	?	?	?	?	?	0	absent	absent	absent	absent	?	?	?	?	?	?	45	37		40	35
41	Coelophysis	Coelophysis lateral	Non-averostran Neotheropoda	Non-averostran Neotheropoda Lateral	CM 81765	mx14	bauri	Hendrickx et al., 2015	Chinle Formation	Coelophysis quarry, Ghost Range	New Mexico	U.S.	Rhaetian	Late Triassic	Adult?	Left	mx14	Lateral	5.2	1.7	6.2	8.7	0.326923	1.19231	2.9	?	?	?	?	?	0	absent	absent	absent	absent	?	?	?	?	?	?		40			40
42	Coelophysis	Coelophysis lateral	Non-averostran Neotheropoda	Non-averostran Neotheropoda Lateral	CM 81765	mx15	bauri	Hendrickx et al., 2015	Chinle Formation	Coelophysis quarry, Ghost Range	New Mexico	U.S.	Rhaetian	Late Triassic	Adult?	Left	mx15	Lateral	3.9	1.49	5.4	7.1	0.382051	1.38462	2.2	?	?	?	?	?	0	absent	absent	absent	absent	?	?	?	?	?	?		40			35
43	Coelophysis	Coelophysis lateral	Non-averostran Neotheropoda	Non-averostran Neotheropoda Lateral	CM 81765	mx16	bauri	Hendrickx et al., 2015	Chinle Formation	Coelophysis quarry, Ghost Range	New Mexico	U.S.	Rhaetian	Late Triassic	Adult?	Left	mx16	Lateral	3.3	1.14	5	6.2	0.345455	1.51515	2	?	?	?	?	?	0	absent	absent	absent	absent	?	?	?	?	?	?		?			40
44	Coelophysis	Coelophysis lateral	Non-averostran Neotheropoda	Non-averostran Neotheropoda Lateral	CM 81765	mx17	bauri	Hendrickx et al., 2015	Chinle Formation	Coelophysis quarry, Ghost Range	New Mexico	U.S.	Rhaetian	Late Triassic	Adult?	Left	mx17	Lateral	3.5	1.63	4.1	6.6	0.465714	1.17143	2.1	?	?	?	?	?	0	absent	absent	absent	absent	?	?	?	?	?	?	?	33	?		35
45	Coelophysis	Coelophysis lateral	Non-averostran Neotheropoda	Non-averostran Neotheropoda Lateral	CM 81765	mx19	bauri	Hendrickx et al., 2015	Chinle Formation	Coelophysis quarry, Ghost Range	New Mexico	U.S.	Rhaetian	Late Triassic	Adult?	Left	mx19	Lateral	3.35	1.86	3.3	3.7	0.555224	0.985075	1.8	?	?	?	?	?	0	absent	absent	absent	absent	?	?	?	?	?	?	?	?	?		40
46	Coelophysis	Coelophysis lateral	Non-averostran Neotheropoda	Non-averostran Neotheropoda Lateral	CM 81765	mx21	bauri	Hendrickx et al., 2015	Chinle Formation	Coelophysis quarry, Ghost Range	New Mexico	U.S.	Rhaetian	Late Triassic	Adult?	Left	mx21	Lateral	3.54	0.93	3.45	5.21	0.262712	0.974576	1.4	?	?	?	?	?	0	absent	absent	absent	absent	?	?	?	?	?	?		35			40
47	Coelophysis	Coelophysis lateral	Non-averostran Neotheropoda	Non-averostran Neotheropoda Lateral	CM 81765	mx22	bauri	Hendrickx et al., 2015	Chinle Formation	Coelophysis quarry, Ghost Range	New Mexico	U.S.	Rhaetian	Late Triassic	Adult?	Left	mx22	Lateral	3.26	0.86	3.8	4.91	0.263804	1.16564	1.4	?	?	?	?	?	0	absent	absent	absent	absent	?	?	?	?	?	?	?	?	?		40
48	Coelophysis	Coelophysis mesial	Non-averostran Neotheropoda	Non-averostran Neotheropoda Mesial	CM 81765	dt1	bauri	Hendrickx et al., 2015	Chinle Formation	Coelophysis quarry, Ghost Range	New Mexico	U.S.	Rhaetian	Late Triassic	Adult?	Left	dt1	Mesial	1.9	1.16	5.1	5.1	0.610526	2.68421	1.4	?	?	?	?	?	0	absent	absent	absent	absent	?	?	?	?	?	?	/	/	/	/	/	/	/	/
49	Coelophysis	Coelophysis lateral	Non-averostran Neotheropoda	Non-averostran Neotheropoda Lateral	CM 81765	dt3	bauri	Hendrickx et al., 2015	Chinle Formation	Coelophysis quarry, Ghost Range	New Mexico	U.S.	Rhaetian	Late Triassic	Adult?	Left	dt3	Lateral	2.6	0.95	6.7	7.4	0.365385	2.57692	2.4	?	?	?	?	?	0	absent	absent	absent	absent	?	?	?	?	?	?	/	35	/		45
50	Coelophysis	Coelophysis lateral	Non-averostran Neotheropoda	Non-averostran Neotheropoda Lateral	CM 81765	dt4	bauri	Hendrickx et al., 2015	Chinle Formation	Coelophysis quarry, Ghost Range	New Mexico	U.S.	Rhaetian	Late Triassic	Adult?	Left	dt4	Lateral	3.1	1.57	6.2	7.3	0.506452	2	2.3	?	?	?	?	?	0	absent	absent	absent	absent	?	?	?	?	?	?	?	?	?		40
51	Dilophosaurus	Dilophosaurus lateral	Non-averostran Neotheropoda	Non-averostran Neotheropoda Lateral	UCMP 37303	mx3	wetherelli	Smith et al., 2005	Kayenta Formation	Tuba City	Arizona	U.S.	Sinemurian	Early Jurassic	Young subadult	Right	mx3	Lateral	16.33	9.87	24.65	30	0.604409	1.50949	?	?	?	?	?	?	?	?	?	?	?	?	?	?	?	80.59	0.1	?	?	?	?	15	?	?	15
52	Dilophosaurus	Dilophosaurus lateral	Non-averostran Neotheropoda	Non-averostran Neotheropoda Lateral	UCMP 37303	mx	wetherelli	Smith et al., 2005	Kayenta Formation	Tuba City	Arizona	U.S.	Sinemurian	Early Jurassic	Young subadult	Left	mx	Lateral	16.35	10.2	28	33	0.623853	1.71254	?	?	?	?	?	?	?	?	?	?	?	?	?	?	?	81.59	0.11	?	?	?	?	14	?	?	14
53	Dilophosaurus	Dilophosaurus lateral	Non-averostran Neotheropoda	Non-averostran Neotheropoda Lateral	UCMP 37303	mx	wetherelli	Smith et al., 2005	Kayenta Formation	Tuba City	Arizona	U.S.	Sinemurian	Early Jurassic	Young subadult	Left	mx	Lateral	19.11	10.4	35.24	47.5	0.544218	1.84406	?	?	?	?	?	?	?	?	?	?	?	?	?	?	?	82.66	0.13	?	?	?	?	15	?	?	15
54	Dilophosaurus	Dilophosaurus lateral	Non-averostran Neotheropoda	Non-averostran Neotheropoda Lateral	UCMP 37303	mx	wetherelli	Smith et al., 2005	Kayenta Formation	Tuba City	Arizona	U.S.	Sinemurian	Early Jurassic	Young subadult	Right	mx	Lateral	17.33	10.14	25.66	31	0.585113	1.48067	?	?	?	?	?	?	?	?	?	?	?	?	?	?	?	81.03	0.08	?	?	?	?	14	?	?	14
55	Dracovenator	Dracovenator mesial	Non-averostran Neotheropoda	Non-averostran Neotheropoda Mesial	BP/1/5243	pmx3	regenti	Young et al., 2019 (C.H. pers. measurements)	upper Elliot Formation	Upper Drumbo, Barkly East district	Eastern Cape	RSA	Hettangian-Toarcian	Early Jurassic	Adult?	Right	pmx3	Mesial	15.1	7.17	31.66	25.28	0.474834	2.09669	11.72	6.61	0.563993	9.37	15.91	62.9351	0	absent	absent	absent	absent	?	?	?	?	?	?	?	?	/	12	13	21.66	?	15.55
56	Dracovenator	Dracovenator lateral	Non-averostran Neotheropoda	Non-averostran Neotheropoda Lateral	BP/1/5243	mx?	regenti	Young et al., 2019 (C.H. pers. measurements)	upper Elliot Formation	Upper Drumbo, Barkly East district	Eastern Cape	RSA	Hettangian-Toarcian	Early Jurassic	Adult?	Right	mx?	Lateral	17.75	7.73	?	?	0.435493	?	14.3	7.8	0.545455	4.48	?	?	3 to 4?	tenuous on the basolingual side, absent on the labial side	absent	absent	absent	?	?	?	?	?	?	?	15.5	19.2	?	13	22.5	17.35	17.75
57	Liliensternus	Liliensternus lateral	Non-averostran Neotheropoda	Non-averostran Neotheropoda Lateral	MBR 21751/4	mx	liliensterni	Smith et al., 2005	Trossingen Formation	Großen Gleichberg	Thüringen	Germany	Norian	Late Triassic	Subadult	unknown	mx	Lateral	6.62	2.5	8.83	12.4	0.377644	1.33384	?	?	?	?	?	?	?	?	?	?	?	?	?	?	?	62.7	0.01	?	35	?	?	20	?	35	20
58	Liliensternus	Liliensternus lateral	Non-averostran Neotheropoda	Non-averostran Neotheropoda Lateral	MBR 21751/3	mx	liliensterni	Smith et al., 2005	Trossingen Formation	Großen Gleichberg	Thüringen	Germany	Norian	Late Triassic	Subadult	unknown	mx	Lateral	7.44	3	10.26	12.52	0.403226	1.37903	?	?	?	?	?	?	?	?	?	?	?	?	?	?	?	67.37	0.09	?	30	?	?	25	?	30	25
59	Liliensternus	Liliensternus mesial	Non-averostran Neotheropoda	Non-averostran Neotheropoda Mesial	MBR 21751/8	d01	liliensterni	Smith et al., 2005	Trossingen Formation	Großen Gleichberg	Thüringen	Germany	Norian	Late Triassic	Subadult	Left	d01	Mesial	5.09	3.5	8.02	9.21	0.687623	1.57564	?	?	?	?	?	?	?	?	?	?	?	?	?	?	?	60.34	0.13	?	30	?	?	25	?	30	25
60	Liliensternus	Liliensternus mesial	Non-averostran Neotheropoda	Non-averostran Neotheropoda Mesial	MBR 21751/8	d04	liliensterni	Smith et al., 2005	Trossingen Formation	Großen Gleichberg	Thüringen	Germany	Norian	Late Triassic	Subadult	Left	d04	Mesial	6.97	3.5	10.61	11.82	0.502152	1.52224	?	?	?	?	?	?	?	?	?	?	?	?	?	?	?	68.48	0.12	?	25	?	?	20	?	25	20
61	Liliensternus	Liliensternus lateral	Non-averostran Neotheropoda	Non-averostran Neotheropoda Lateral	MBR 21751/8	d15	liliensterni	Smith et al., 2005	Trossingen Formation	Großen Gleichberg	Thüringen	Germany	Norian	Late Triassic	Subadult	Left	d15	Lateral	8.34	3.5	10.53	12.62	0.419664	1.26259	?	?	?	?	?	?	?	?	?	?	?	?	?	?	?	68.52	0.04	?	25	?	?	20	?	25	20
62	Liliensternus	Liliensternus lateral	Non-averostran Neotheropoda	Non-averostran Neotheropoda Lateral	MBR 21751/8	d16	liliensterni	Smith et al., 2005	Trossingen Formation	Großen Gleichberg	Thüringen	Germany	Norian	Late Triassic	Subadult	Left	d16	Lateral	5.85	3	8.84	10.12	0.512821	1.51111	?	?	?	?	?	?	?	?	?	?	?	?	?	?	?	63.58	0.12	?	30	?	?	25	?	30	25
63	Liliensternus	Liliensternus lateral	Non-averostran Neotheropoda	Non-averostran Neotheropoda Lateral	MBR 21751/9	?d19	liliensterni	Smith et al., 2005	Trossingen Formation	Großen Gleichberg	Thüringen	Germany	Norian	Late Triassic	Subadult	Right	?d19	Lateral	6.63	2.5	11.23	12.92	0.377074	1.69382	?	?	?	?	?	?	?	?	?	?	?	?	?	?	?	68.97	0.19	?	35	?	?	30	?	35	30
64	Genyodectes	Genyodectes lateral	Non-abelisauroid Ceratosauria	Non-abelisauroid Ceratosauria Lateral	MLP 26-39	mx1	serus	Hendrickx et al., 2015	Cerro Barcino Formation	Cañadón Grande	Chubut Province	Argentina	Aptian-Albian	'Middle Cretaceous'	Adult?	Left	mx1	Lateral	23.03	11.74	60.54	65.46	0.50977	2.62	?	?	?	?	?	?	0	absent	absent	absent	absent	?	?	?	?	?	?	?	10.5	?	?	11.5	?	10.5	11.5
65	Genyodectes	Genyodectes lateral	Non-abelisauroid Ceratosauria	Non-abelisauroid Ceratosauria Lateral	MLP 26-39	mx6	serus	Hendrickx et al., 2015	Cerro Barcino Formation	Cañadón Grande	Chubut Province	Argentina	Aptian-Albian	'Middle Cretaceous'	Adult?	Right	mx6	Lateral	27.51	9.15	50.73	62.12	0.332606	1.84406	23.32	9.06	0.388508	?	?	?	0	absent	DC short	absent	absent	?	?	?	?	?	?	?	?	?	?	12.5	?	?	12.5
66	Genyodectes	Genyodectes mesial	Non-abelisauroid Ceratosauria	Non-abelisauroid Ceratosauria Mesial	MLP 26-39	dt2	serus	Hendrickx et al., 2015	Cerro Barcino Formation	Cañadón Grande	Chubut Province	Argentina	Aptian-Albian	'Middle Cretaceous'	Adult?	Left	dt2	Mesial	17.2	11.3	43.65	44.13	0.656977	2.53779	16.44	8.7	0.529197	?	?	?	0	absent	absent	absent	absent	?	?	?	?	?	?	?	?	?	11.25	11	17	?	13.08
67	Genyodectes	Genyodectes lateral	Non-abelisauroid Ceratosauria	Non-abelisauroid Ceratosauria Lateral	MLP 26-39	dt4	serus	Hendrickx et al., 2015	Cerro Barcino Formation	Cañadón Grande	Chubut Province	Argentina	Aptian-Albian	'Middle Cretaceous'	Adult?	Left	dt4	Lateral	22.27	7.16	52.84	58.52	0.321509	2.3727	?	?	?	?	?	?	0	absent	absent	absent	absent	?	?	?	?	?	?	?	15	?	?	?	?	15	?
68	Genyodectes	Genyodectes mesial	Non-abelisauroid Ceratosauria	Non-abelisauroid Ceratosauria Mesial	MLP 26-39	dt1	serus	Hendrickx et al., 2015	Cerro Barcino Formation	Cañadón Grande	Chubut Province	Argentina	Aptian-Albian	'Middle Cretaceous'	Adult?	Right	dt1	Mesial	13.84	9.05	28.75	35.85	0.653902	2.07731	?	?	?	?	?	?	0	absent	absent	absent	absent	?	?	?	?	?	?	?	?	?	?	13.5	?	?	13.5
69	Genyodectes	Genyodectes mesial	Non-abelisauroid Ceratosauria	Non-abelisauroid Ceratosauria Mesial	MLP 26-39	dt2	serus	Hendrickx et al., 2015	Cerro Barcino Formation	Cañadón Grande	Chubut Province	Argentina	Aptian-Albian	'Middle Cretaceous'	Adult?	Right	dt2	Mesial	16.61	11.21	34.33	39.53	0.674895	2.06683	14.47	9.43	0.651693	8.12	31.41	?	3	tenuous, lingual side	absent	absent	absent	?	?	?	?	?	?	11.66	15	?	?	13	17	13.33	15
70	Genyodectes	Genyodectes lateral	Non-abelisauroid Ceratosauria	Non-abelisauroid Ceratosauria Lateral	MLP 26-39	dt3	serus	Hendrickx et al., 2015	Cerro Barcino Formation	Cañadón Grande	Chubut Province	Argentina	Aptian-Albian	'Middle Cretaceous'	Adult?	Right	dt3	Lateral	21.48	12.57	46.02	46.26	0.585196	2.14246	18.79	10.13	0.539117	6.96	39.3	?	2	tenuous, lingual side	absent	absent	absent	?	?	?	?	?	?	?	11.66	?	11.25	11.5	15	11.66	12.58
71	Genyodectes	Genyodectes lateral	Non-abelisauroid Ceratosauria	Non-abelisauroid Ceratosauria Lateral	MLP 26-39	dt5	serus	Hendrickx et al., 2015	Cerro Barcino Formation	Cañadón Grande	Chubut Province	Argentina	Aptian-Albian	'Middle Cretaceous'	Adult?	Right	dt5	Lateral	18.88	10.57	37.82	45.43	0.559852	2.00318	16.85	9.04	0.536499	?	?	?	2	tenuous, both sides	absent	absent	absent	?	?	?	?	?	?	11.5	10.5	?	12.5	13	?	11	12.75
72	Genyodectes	Genyodectes lateral	Non-abelisauroid Ceratosauria	Non-abelisauroid Ceratosauria Lateral	MLP 26-39	dt7	serus	Hendrickx et al., 2015	Cerro Barcino Formation	Cañadón Grande	Chubut Province	Argentina	Aptian-Albian	'Middle Cretaceous'	Adult?	Right	dt7	Lateral	19.91	10.32	41.69	42.78	0.518332	2.09392	18.16	9.86	0.542952	8.35	34.43	80.4815	2	tenuous, lingual side	DC short	absent	absent	?	?	?	?	?	?	11.25	12.5	?	11.5	12	15	11.875	12.83
73	Ceratosaurus	Ceratosaurus lateral	Non-abelisauroid Ceratosauria	Non-abelisauroid Ceratosauria Lateral	NMNH 4735	dt7	nasicornis	Hendrickx et al., 2015	Morrisson Formation	Canyon City, Garden Park, Quarry I	Colorado	U.S.	Kimmeridgian-Tithonian	Late Jurassic	Adult	Left	dt7	Lateral	19	6.5	34.8	40.9	0.342105	1.83158	14.8	6.4	0.432432	0	40.9	100	4	?	?	absent	absent	?	?	?	?	?	?	?	12.5	18	10	13	?	15.25	11.5
74	Ceratosaurus	Ceratosaurus lateral	Non-abelisauroid Ceratosauria	Non-abelisauroid Ceratosauria Lateral	NMNH 4735	dt9	nasicornis	Hendrickx et al., 2015	Morrisson Formation	Canyon City, Garden Park, Quarry I	Colorado	U.S.	Kimmeridgian-Tithonian	Late Jurassic	Adult	Left	dt9	Lateral	18.4	7.3	32.3	39.6	0.396739	1.75543	15.6	7.5	0.480769	?	?	?	4	?	?	absent	absent	?	?	?	?	?	?	?	12.5	?	?	13.33	?	12.5	13.33
75	Ceratosaurus	Ceratosaurus lateral	Non-abelisauroid Ceratosauria	Non-abelisauroid Ceratosauria Lateral	NMNH 4735	dt10	nasicornis	Hendrickx et al., 2015	Morrisson Formation	Canyon City, Garden Park, Quarry I	Colorado	U.S.	Kimmeridgian-Tithonian	Late Jurassic	Adult	Left	dt10	Lateral	18.1	7.5	34.5	38.3	0.414365	1.90608	15	6.4	0.426667	?	?	?	?	?	?	absent	absent	?	?	?	?	?	?	?	?	?	?	?	?	?	?
76	Ceratosaurus	Ceratosaurus lateral	Non-abelisauroid Ceratosauria	Non-abelisauroid Ceratosauria Lateral	NMNH 4735	dt6	nasicornis	Hendrickx et al., 2015	Morrisson Formation	Canyon City, Garden Park, Quarry I	Colorado	U.S.	Kimmeridgian-Tithonian	Late Jurassic	Adult	Right	dt6	Lateral	17.4	8.8	34.6	38.8	0.505747	1.98851	14.3	8.1	0.566434	0	38.8	100	?	?	?	absent	absent	?	?	?	?	?	?	?	10	?	11	11.5	?	10	11.25
77	Ceratosaurus	Ceratosaurus lateral	Non-abelisauroid Ceratosauria	Non-abelisauroid Ceratosauria Lateral	NMNH 4735	dt12	nasicornis	Hendrickx et al., 2015	Morrisson Formation	Canyon City, Garden Park, Quarry I	Colorado	U.S.	Kimmeridgian-Tithonian	Late Jurassic	Adult	Right	dt12	Lateral	15	8	28.3	29.4	0.533333	1.88667	12.7	5.7	0.448819	?	?	?	?	?	?	absent	absent	?	?	?	?	?	?	?	11.25	?	?	12.5	?	11.25	12.5
78	Ceratosaurus	Ceratosaurus lateral	Non-abelisauroid Ceratosauria	Non-abelisauroid Ceratosauria Lateral	NMNH 4735	dt13	nasicornis	Hendrickx et al., 2015	Morrisson Formation	Canyon City, Garden Park, Quarry I	Colorado	U.S.	Kimmeridgian-Tithonian	Late Jurassic	Adult	Right	dt13	Lateral	14.9	6.7	25.4	26.9	0.449664	1.7047	6.8	5	0.735294	0	26.9	100	5	?	?	absent	absent	?	?	?	?	?	?	15	12	?	?	?	?	13.5	?
79	Ceratosaurus	Ceratosaurus lateral	Non-abelisauroid Ceratosauria	Non-abelisauroid Ceratosauria Lateral	BYU 881 12893	mx3	nasicornis	Young et al., 2019 (C.H. pers. measurements)	Morrisson Formation	Agate Basin, Emery Co	Utah	U.S.	Kimmeridgian-Tithonian	Late Jurassic	Adult	Left	mx3	Lateral	30.03	11.42	62.47	77.05	0.380286	2.08025	24.24	10.09	0.416254	?	?	?	1	one extremely low on central labial surface	DB DC weak	absent	absent	?	?	?	?	?	?	10	8.75	?	?	9	20	9.375	14.5
80	Ceratosaurus	Ceratosaurus lateral	Non-abelisauroid Ceratosauria	Non-abelisauroid Ceratosauria Lateral	BYU 881 12893	mx7	nasicornis	Young et al., 2019 (C.H. pers. measurements)	Morrisson Formation	Agate Basin, Emery Co	Utah	U.S.	Kimmeridgian-Tithonian	Late Jurassic	Adult	Left	mx7	Lateral	27.52	9.75	59.96	66.32	0.354288	2.17878	22.21	8.53	0.384061	?	?	?	0	absent	DC medium to long	absent	absent	?	?	?	?	?	?	?	10	12.5	15	10.33	?	11.25	12.665
81	Ceratosaurus	Ceratosaurus mesial	Non-abelisauroid Ceratosauria	Non-abelisauroid Ceratosauria Mesial	UMNH VP 5278 (= UMNH VP 7819 of Smith, 2005)	pm01	dentisulcatus	Young et al., 2019 (C.H. pers. measurements)	Morrisson Formation	Cleveland-Lloyd Dinosaur Quarry, Emery Co.	Utah	U.S.	Kimmeridgian-Tithonian	Late Jurassic	Adult	Left	pm01	Mesial	24.2	14.53	34.03	39.37	0.600413	1.4062	13.99	11.78	0.84203	33.03	6.34	16.1036	2/5mm	tenuous on labial side	?	absent	4	?	?	?	?	?	?	10	/	/	?	8	?	10	8
82	Ceratosaurus	Ceratosaurus mesial	Non-abelisauroid Ceratosauria	Non-abelisauroid Ceratosauria Mesial	UMNH VP 5278 (= UMNH VP 7819 of Smith, 2005)	pm02	dentisulcatus	Young et al., 2019 (C.H. pers. measurements)	Morrisson Formation	Cleveland-Lloyd Dinosaur Quarry, Emery Co.	Utah	U.S.	Kimmeridgian-Tithonian	Late Jurassic	Adult	Left	pm02	Mesial	22.32	17.46	40.19	44.38	0.782258	1.80063	16.48	15.19	0.921723	25.95	18.43	41.5277	1 or 2	very tenuous on labial side	absent	absent	3?	?	?	?	?	?	?	?	12.5	/	11.66	8.5	13.33	12.5	11.16
83	Ceratosaurus	Ceratosaurus mesial	Non-abelisauroid Ceratosauria	Non-abelisauroid Ceratosauria Mesial	UMNH VP 5278 (= UMNH VP 7819 of Smith, 2005)	pm03	dentisulcatus	Young et al., 2019 (C.H. pers. measurements)	Morrisson Formation	Cleveland-Lloyd Dinosaur Quarry, Emery Co.	Utah	U.S.	Kimmeridgian-Tithonian	Late Jurassic	Adult	Left	pm03	Mesial	23.5	14.33	44.09	48.33	0.609787	1.87617	17.42	12.34	0.708381	20.69	27.64	57.1902	2	very tenuous on labial side	DC short to absent	absent	7?	?	?	?	?	?	?	10	15	/	?	8.33	?	12.5	8.33
84	Ceratosaurus	Ceratosaurus mesial	Non-abelisauroid Ceratosauria	Non-abelisauroid Ceratosauria Mesial	UMNH VP 5278 (= UMNH VP 7819 of Smith, 2005)	pm01	dentisulcatus	Young et al., 2019 (C.H. pers. measurements)	Morrisson Formation	Cleveland-Lloyd Dinosaur Quarry, Emery Co.	Utah	U.S.	Kimmeridgian-Tithonian	Late Jurassic	Adult	Right	pm01	Mesial	19.73	14.21	35.93	37.78	0.720223	1.82108	14.33	12.09	0.843685	28.06	9.72	25.7279	2	very tenuous on labial side	DC short to absent	absent	4	?	?	?	?	?	?	13	11.25	/	10	8.33	?	12.12	9.16
85	Ceratosaurus	Ceratosaurus mesial	Non-abelisauroid Ceratosauria	Non-abelisauroid Ceratosauria Mesial	UMNH VP 5278 (= UMNH VP 7819 of Smith, 2005)	pm03	dentisulcatus	Young et al., 2019 (C.H. pers. measurements)	Morrisson Formation	Cleveland-Lloyd Dinosaur Quarry, Emery Co.	Utah	U.S.	Kimmeridgian-Tithonian	Late Jurassic	Adult	Right	pm03	Mesial	21.96	14.47	40.9	45.1	0.658925	1.86248	17.04	11.48	0.673709	18.7	26.4	58.5366	2	very tenuous on labial side	DC short to absent	absent	6	?	?	?	?	?	?	9.5	11.66	/	10	8	11.66	11.66	9.88
86	Ceratosaurus	Ceratosaurus lateral	Non-abelisauroid Ceratosauria	Non-abelisauroid Ceratosauria Lateral	UMNH VP 5278	mx03	dentisulcatus	Young et al., 2019 (C.H. pers. measurements)	Morrisson Formation	Cleveland-Lloyd Dinosaur Quarry, Emery Co.	Utah	U.S.	Kimmeridgian-Tithonian	Late Jurassic	Adult	Left	mx03	Lateral	31.11	13.27	66.46	75.08	0.426551	2.13629	24.93	11.83	0.474529	?	?	?	2	many visible with light on labial side	DC medium	absent	absent	?	?	?	?	?	?	8.75	11.5	?	9.5	11.25	?	10.125	10.37
87	Ceratosaurus	Ceratosaurus lateral	Non-abelisauroid Ceratosauria	Non-abelisauroid Ceratosauria Lateral	UMNH VP 5278	mx05	dentisulcatus	Young et al., 2019 (C.H. pers. measurements)	Morrisson Formation	Cleveland-Lloyd Dinosaur Quarry, Emery Co.	Utah	U.S.	Kimmeridgian-Tithonian	Late Jurassic	Adult	Left	mx05	Lateral	33.8	11.95	72.84	81.37	0.35355	2.15503	29.25	12.79	0.437265	?	?	?	2 to 3	tenuous on lingual side, short marginal undulations close to DC on lingual	DC medium	absent	absent	?	?	?	?	?	?	9.375	10.83	?	?	11	15	10.1	13
88	Ceratosaurus	Ceratosaurus lateral	Non-abelisauroid Ceratosauria	Non-abelisauroid Ceratosauria Lateral	UMNH VP 5278	mx08	dentisulcatus	Young et al., 2019 (C.H. pers. measurements)	Morrisson Formation	Cleveland-Lloyd Dinosaur Quarry, Emery Co.	Utah	U.S.	Kimmeridgian-Tithonian	Late Jurassic	Adult	Left	mx08	Lateral	27.46	8.68	54.13	57.42	0.316096	1.97123	23.56	9.06	0.38455	0	57.42	100	2	tenous on lingual side	MC short, DC medium	absent	absent	?	?	?	?	?	?	11.5	11.5	17.5	11	11	15	13.5	12.33
89	Ceratosaurus	Ceratosaurus lateral	Non-abelisauroid Ceratosauria	Non-abelisauroid Ceratosauria Lateral	UMNH VP 5278	mx10	dentisulcatus	Young et al., 2019 (C.H. pers. measurements)	Morrisson Formation	Cleveland-Lloyd Dinosaur Quarry, Emery Co.	Utah	U.S.	Kimmeridgian-Tithonian	Late Jurassic	Adult	Left	mx10	Lateral	20.98	9.73	41.42	43.3	0.463775	1.97426	18.03	8.11	0.449806	?	?	?	2	visible on lingual side	DC medium	absent	absent	?	?	?	?	?	?	10	13	?	11.66	11.66	?	11.5	11.66
90	Ceratosaurus	Ceratosaurus mesial	Non-abelisauroid Ceratosauria	Non-abelisauroid Ceratosauria Mesial	UMNH VP 5278	dt2	dentisulcatus	Young et al., 2019 (C.H. pers. measurements)	Morrisson Formation	Cleveland-Lloyd Dinosaur Quarry, Emery Co.	Utah	U.S.	Kimmeridgian-Tithonian	Late Jurassic	Adult	Left	dt2	Mesial	18.61	14.28	32.26	27.45	0.767329	1.73348	14.1	9.95	0.705674	15.61	11.84	43.133	2	very tenuous on labial side	DC short	absent	4	?	?	?	?	?	?	?	13	/	?	10	12.5	13	11.25
91	Ceratosaurus	Ceratosaurus lateral	Non-abelisauroid Ceratosauria	Non-abelisauroid Ceratosauria Lateral	UMNH VP 5278	dt8	dentisulcatus	Young et al., 2019 (C.H. pers. measurements)	Morrisson Formation	Cleveland-Lloyd Dinosaur Quarry, Emery Co.	Utah	U.S.	Kimmeridgian-Tithonian	Late Jurassic	Adult	Left	dt8	Lateral	21.99	9.21	39.16	40.41	0.418827	1.78081	18.55	8.35	0.450135	?	?	?	3	visible with light on labial side	M absent, D?	absent	absent	?	?	?	?	?	?	?	12	17.5	?	12	?	14.75	12
92	Ceratosaurus	Ceratosaurus lateral	Non-abelisauroid Ceratosauria	Non-abelisauroid Ceratosauria Lateral	UMNH VP 5278	dt9	dentisulcatus	Young et al., 2019 (C.H. pers. measurements)	Morrisson Formation	Cleveland-Lloyd Dinosaur Quarry, Emery Co.	Utah	U.S.	Kimmeridgian-Tithonian	Late Jurassic	Adult	Left	dt9	Lateral	17.62	7.38	30.29	30.1	0.418842	1.71907	14.62	6.91	0.47264	?	?	?	2	very tenous on lingual side	DC short on labial	absent	absent	?	?	?	?	?	?	13.75	12.5	?	12.5	11.66	13	13.125	12.39
93	Ceratosaurus	Ceratosaurus mesial	Non-abelisauroid Ceratosauria	Non-abelisauroid Ceratosauria Mesial	UMNH VP 5278 (= UMNH VP 7819 of Smith, 2005)	pm01	dentisulcatus	Smith et al., 2005	Morrisson Formation	Cleveland-Lloyd Dinosaur Quarry, Emery Co.	Utah	U.S.	Kimmeridgian-Tithonian	Late Jurassic	Adult	Left	pm01	Mesial	25.86	14.79	31.63	41.28	0.571926	1.22312	?	?	?	?	?	?	?	?	?	?	?	?	?	?	?	82.94	-0.13	9	?	?	7.5	8	10	9	8.5
94	Ceratosaurus	Ceratosaurus mesial	Non-abelisauroid Ceratosauria	Non-abelisauroid Ceratosauria Mesial	UMNH VP 5278 (= UMNH VP 7819 of Smith, 2005)	pm02	dentisulcatus	Smith et al., 2005	Morrisson Formation	Cleveland-Lloyd Dinosaur Quarry, Emery Co.	Utah	U.S.	Kimmeridgian-Tithonian	Late Jurassic	Adult	Left	pm02	Mesial	23	16.81	41.89	43.74	0.73087	1.8213	?	?	?	?	?	?	?	?	?	?	?	?	?	?	?	84.76	0	12	?	?	7	8	12	12	9
95	Ceratosaurus	Ceratosaurus mesial	Non-abelisauroid Ceratosauria	Non-abelisauroid Ceratosauria Mesial	UMNH VP 5278 (= UMNH VP 7819 of Smith, 2005)	pm03	dentisulcatus	Smith et al., 2005	Morrisson Formation	Cleveland-Lloyd Dinosaur Quarry, Emery Co.	Utah	U.S.	Kimmeridgian-Tithonian	Late Jurassic	Adult	Left	pm03	Mesial	24.04	14.88	41.66	48.6	0.618968	1.73295	?	?	?	?	?	?	?	?	?	?	?	?	?	?	?	84.38	0	10	8	14	12	9	13	10.6667	11.3333
96	Ceratosaurus	Ceratosaurus mesial	Non-abelisauroid Ceratosauria	Non-abelisauroid Ceratosauria Mesial	UMNH VP 5278 (= UMNH VP 7819 of Smith, 2005)	pm01	dentisulcatus	Smith et al., 2005	Morrisson Formation	Cleveland-Lloyd Dinosaur Quarry, Emery Co.	Utah	U.S.	Kimmeridgian-Tithonian	Late Jurassic	Adult	Right	pm01	Mesial	20.26	14.31	38.69	41.36	0.706318	1.90967	?	?	?	?	?	?	?	?	?	?	?	?	?	?	?	84.2	0.04	12	?	?	9	8	13	12	10
97	Ceratosaurus	Ceratosaurus mesial	Non-abelisauroid Ceratosauria	Non-abelisauroid Ceratosauria Mesial	UMNH VP 5278 (= UMNH VP 7819 of Smith, 2005)	pm03	dentisulcatus	Smith et al., 2005	Morrisson Formation	Cleveland-Lloyd Dinosaur Quarry, Emery Co.	Utah	U.S.	Kimmeridgian-Tithonian	Late Jurassic	Adult	Right	pm03	Mesial	22.64	13.9	39.65	48.11	0.613958	1.75133	?	?	?	?	?	?	?	?	?	?	?	?	?	?	?	83.94	-0.02	13	9	12	8.8	7	12.8	11.3333	9.53333
98	Ceratosaurus	Ceratosaurus lateral	Non-abelisauroid Ceratosauria	Non-abelisauroid Ceratosauria Lateral	UMNH VP 5278	mx01	dentisulcatus	Smith et al., 2005	Morrisson Formation	Cleveland-Lloyd Dinosaur Quarry, Emery Co.	Utah	U.S.	Kimmeridgian-Tithonian	Late Jurassic	Adult	Left	mx01	Lateral	25.47	15.1	51.32	56.11	0.592854	2.01492	?	?	?	?	?	?	?	?	?	?	?	?	?	?	?	85.51	-0.06	11	9	13	9.8	9	?	11	9.4
99	Ceratosaurus	Ceratosaurus lateral	Non-abelisauroid Ceratosauria	Non-abelisauroid Ceratosauria Lateral	UMNH VP 5278	mx03	dentisulcatus	Smith et al., 2005	Morrisson Formation	Cleveland-Lloyd Dinosaur Quarry, Emery Co.	Utah	U.S.	Kimmeridgian-Tithonian	Late Jurassic	Adult	Left	mx03	Lateral	29.61	12.88	61.71	72.86	0.434988	2.08409	?	?	?	?	?	?	?	?	?	?	?	?	?	?	?	86	-0.08	11	11	13	12	10	?	11.6667	11
100	Ceratosaurus	Ceratosaurus lateral	Non-abelisauroid Ceratosauria	Non-abelisauroid Ceratosauria Lateral	UMNH VP 5278	mx05	dentisulcatus	Smith et al., 2005	Morrisson Formation	Cleveland-Lloyd Dinosaur Quarry, Emery Co.	Utah	U.S.	Kimmeridgian-Tithonian	Late Jurassic	Adult	Left	mx05	Lateral	32.95	14	75	84.46	0.424886	2.27618	?	?	?	?	?	?	?	?	?	?	?	?	?	?	?	86.77	0	9.5	12.8	16	13	11	16.3	12.7667	13.4333
101	Ceratosaurus	Ceratosaurus lateral	Non-abelisauroid Ceratosauria	Non-abelisauroid Ceratosauria Lateral	UMNH VP 5278	mx08	dentisulcatus	Smith et al., 2005	Morrisson Formation	Cleveland-Lloyd Dinosaur Quarry, Emery Co.	Utah	U.S.	Kimmeridgian-Tithonian	Late Jurassic	Adult	Left	mx08	Lateral	27.52	10.53	52.38	61.54	0.382631	1.90334	?	?	?	?	?	?	?	?	?	?	?	?	?	?	?	85.41	-0.01	12	14	20	12.5	12	15	15.3333	13.1667
102	Ceratosaurus	Ceratosaurus lateral	Non-abelisauroid Ceratosauria	Non-abelisauroid Ceratosauria Lateral	UMNH VP 5278	mx10	dentisulcatus	Smith et al., 2005	Morrisson Formation	Cleveland-Lloyd Dinosaur Quarry, Emery Co.	Utah	U.S.	Kimmeridgian-Tithonian	Late Jurassic	Adult	Left	mx10	Lateral	20.79	9.12	38.11	42.69	0.438672	1.83309	?	?	?	?	?	?	?	?	?	?	?	?	?	?	?	83.94	0.02	12.5	12	?	12	10.5	13	12.25	11.8333
103	Ceratosauridae	Ceratosauridae mesial	Non-abelisauroid Ceratosauria	Non-abelisauroid Ceratosauria Mesial	FC-DPV 1950	Isolated	sp.	Soto & Perea, 2008	Tacuarembó Formation	Martinote, Batoví Hills	Tacuarembó Province	Uruguay	Kimmeridgian - Hautherivian	Late Jurassic - Early Cretaceous	?	/	Isolated	Mesial	6.47	5.29	15.17	?	0.81762	2.34467	?	?	?	?	?	?	?	?	?	?	?	?	?	?	?	?	?	?	30	?	?	14	?	30	14
104	Ceratosauridae	Ceratosauridae mesial	Non-abelisauroid Ceratosauria	Non-abelisauroid Ceratosauria Mesial	FC-DPV 2150	Isolated	sp.	Soto & Perea, 2008	Tacuarembó Formation	Martinote, Batoví Hills	Tacuarembó Province	Uruguay	Kimmeridgian - Hautherivian	Late Jurassic - Early Cretaceous	?	/	Isolated	Mesial	5.91	4.12	10	?	0.697124	1.69205	?	?	?	?	?	?	?	?	?	?	?	?	?	?	?	?	?	?	?	?	?	?	?	30	?
105	Berberosaurus	Berberosaurus lateral	Non-abelisauroid Ceratosauria	Non-abelisauroid Ceratosauria Lateral	MNHN Pt369	Isolated	liassicus	Hendrickx et al., 2015	Upper bone bed of the Toundoute intercontinental serie	Douar of Tazouda	Ouarzazate Province	Morocco	Pliensbachian-Toarcian	Early Jurassic	?	/	Isolated	Lateral	17.8	6.4	32.3	38.4	0.359551	1.81461	11.7	5.3	0.452991	9.3	29.1	75.7812	2/mm	tenuous	absent	absent	absent	1.3	2.6	0.2	0.3	?	?	14	18	/	15	15	17.5	16	15.8333
106	Berberosaurus	Berberosaurus lateral	Non-abelisauroid Ceratosauria	Non-abelisauroid Ceratosauria Lateral	MNHN Pt369	Isolated	liassicus	Hendrickx et al., 2015	Upper bone bed of the Toundoute intercontinental serie	Douar of Tazouda	Ouarzazate Province	Morocco	Pliensbachian-Toarcian	Early Jurassic	?	/	Isolated	Lateral	18.6	9.1	41.8	46.8	0.489247	2.24731	14.2	7	0.492958	?	?	?	2/2 mm centrally, 4/2 mm apically	visible	absent	absent	absent	?	2	2.2	2.2	?	?	?	13.3	/	13.5	13.5	12.5	13.3	13.1667
107	Noasaurus	Noasaurus lateral	Noasauridae	Noasauridae Lateral	PVL 4061	mx6	leali	Hendrickx et al., 2015	Lecho Formation	El Brete	Salta Province	Argentina	Maastrichtian?	Late Cretaceous	?	Left	mx6	Lateral	3.11	1.84	3.33	4.24	0.59164	1.07074	?	?	?	?	?	?	0	absent	absent	absent	absent	?	?	?	?	?	?	?	?	?	?	20	?	?	20
108	Noasaurus	Noasaurus lateral	Noasauridae	Noasauridae Lateral	PVL 4061	mx8	leali	Hendrickx et al., 2015	Lecho Formation	El Brete	Salta Province	Argentina	Maastrichtian?	Late Cretaceous	?	Left	mx8	Lateral	3.04	1.81	4.98	5.91	0.595395	1.63816	2.24	1.32	0.589286	0	5.91	100	0	absent	absent	absent	absent	?	?	?	?	?	?	?	32.5	?	?	25	?	32.5	25
109	Masiakasaurus	Masiakasaurus mesial	Noasauridae	Noasauridae Mesial	UA 9128 (most mesial tooth)	Isolated, mesial	knopfleri	Hendrickx et al., 2015	Maevarano Formation	Berivotra Village	Majunga Basin	Madagascar	Maastrichtian	Late Cretaceous	?	/	Isolated, mesial	Mesial	2.44	2.63	7.71	6.32	1.07787	3.15984	2.76	2.28	0.826087	2.21	4.11	65.0316	2/1 mm	visible	absent	absent	absent	?	?	?	?	?	?	/	/	/	/	/	/	/	/
110	Masiakasaurus	Masiakasaurus mesial	Noasauridae	Noasauridae Mesial	FMNH PR 2696 (small)	Isolated, mesial	knopfleri	Hendrickx et al., 2015	Maevarano Formation	Berivotra Village	Majunga Basin	Madagascar	Maastrichtian	Late Cretaceous	?	/	Isolated, mesial	Mesial	2.24	2.54	6.64	6.49	1.13393	2.96429	2.51	1.95	0.776892	1.95	4.54	69.9538	0	absent	absent	absent	5	?	?	?	?	?	?	/	/	/	35	35	?	/	35
111	Masiakasaurus	Masiakasaurus mesial	Noasauridae	Noasauridae Mesial	FMNH PR 2182	Isolated, mesial	knopfleri	Hendrickx et al., 2015	Maevarano Formation	Berivotra Village	Majunga Basin	Madagascar	Maastrichtian	Late Cretaceous	?	/	Isolated, mesial	Mesial	2.32	2.21	6.1	6.49	0.952586	2.62931	2.14	1.57	0.733645	0	6.49	100	3/2mm	well visible	absent	absent	2	?	?	?	?	?	?	?	40	?	?	40	?	40	40
112	Masiakasaurus	Masiakasaurus mesial	Noasauridae	Noasauridae Mesial	FMNH PR 2471	dt1	knopfleri	Hendrickx et al., 2015	Maevarano Formation	Berivotra Village	Majunga Basin	Madagascar	Maastrichtian	Late Cretaceous	?	Left	dt1	Mesial	2.79	3.48	7.7	7.94	1.24731	2.75986	3.1	2.42	0.780645	2.11	5.83	73.4257	?	if present, tenuous	absent	absent	3	?	?	?	?	?	?	?	35	?	?	30	40	35	35
113	Masiakasaurus	Masiakasaurus lateral	Noasauridae	Noasauridae Lateral	UA 8680	dt4	knopfleri	Hendrickx et al., 2015	Maevarano Formation	Berivotra Village	Majunga Basin	Madagascar	Maastrichtian	Late Cretaceous	?	Right	dt4	Lateral	2.86	2.04	6.23	5.96	0.713287	2.17832	2.04	2.46	1.20588	0	5.96	100	0	absent	absent	absent	5	?	?	?	?	?	?		35			40
114	Masiakasaurus	Masiakasaurus lateral	Noasauridae	Noasauridae Lateral	UA 8680	dt6	knopfleri	Hendrickx et al., 2015	Maevarano Formation	Berivotra Village	Majunga Basin	Madagascar	Maastrichtian	Late Cretaceous	?	Right	dt6	Lateral	3.04	1.85	4.76	4.3	0.608553	1.56579	1.86	1.4	0.752688	0	4.3	100	0	absent	absent	absent	1	?	?	?	?	?	?		?			40
115	Masiakasaurus	Masiakasaurus lateral	Noasauridae	Noasauridae Lateral	FMNH PR 2221	Isolated	knopfleri	Hendrickx et al., 2015	Maevarano Formation	Berivotra Village	Majunga Basin	Madagascar	Maastrichtian	Late Cretaceous	?	/	Isolated	Lateral	5.06	2.04	8.71	10.06	0.403162	1.72134	3.94	1.77	0.449239	0	10.06	100	3/1mm	tenuous	absent	absent	absent	?	?	?	?	?	?		27.5			18.33
116	Masiakasaurus	Masiakasaurus lateral	Noasauridae	Noasauridae Lateral	FMNH PR 2476	Isolated	knopfleri	Hendrickx et al., 2015	Maevarano Formation	Berivotra Village	Majunga Basin	Madagascar	Maastrichtian	Late Cretaceous	?	/	Isolated	Lateral	2.41	1.29	4.58	4.77	0.53527	1.90041	2.3	1.3	0.565217	/	/	/	3/1mm	visible	absent	absent	absent	?	?	?	?	?	?	/	/	/		40
117	Masiakasaurus	Masiakasaurus lateral	Noasauridae	Noasauridae Lateral	FMNH PR 2201	Isolated	knopfleri	Hendrickx et al., 2015	Maevarano Formation	Berivotra Village	Majunga Basin	Madagascar	Maastrichtian	Late Cretaceous	?	/	Isolated	Lateral	6.27	3.14	11.39	13.74	0.500797	1.81659	4.55	2.36	0.518681	0	13.74	100	0	absent	absent	absent	absent	?	?	?	?	?	?		20			15
118	Masiakasaurus	Masiakasaurus lateral	Noasauridae	Noasauridae Lateral	UA 9091	Isolated	knopfleri	Hendrickx et al., 2015	Maevarano Formation	Berivotra Village	Majunga Basin	Madagascar	Maastrichtian	Late Cretaceous	?	/	Isolated	Lateral	2.76	1.37	4.34	5.45	0.496377	1.57246	2.3	1.11	0.482609	?	?	?	0	absent	absent	absent	absent	?	?	?	?	?	?		50			35
119	Masiakasaurus	Masiakasaurus lateral	Noasauridae	Noasauridae Lateral	FMNH PR 2696 (big)	Isolated	knopfleri	Hendrickx et al., 2015	Maevarano Formation	Berivotra Village	Majunga Basin	Madagascar	Maastrichtian	Late Cretaceous	?	/	Isolated	Lateral	4.64	2.45	11.84	11.36	0.528017	2.55172	3.68	2.14	0.581522	0	11.36	100	0	absent	absent	absent	absent	?	?	?	?	?	?		20			15
120	Masiakasaurus	Masiakasaurus mesial	Noasauridae	Noasauridae Mesial	98312-1	Isolated	knopfleri	Smith et al., 2005	Maevarano Formation	Berivotra Village	Majunga Basin	Madagascar	Maastrichtian	Late Cretaceous	?	/	Isolated, mesial?	Mesial	4.47	3.93	7.46	8.59	0.879195	1.6689	?	?	?	?	?	?	?	?	?	?	?	?	?	?	?	57.4	0.06	17	17	17	14	14.5	15	17	14.5
121	Masiakasaurus	Masiakasaurus lateral	Noasauridae	Noasauridae Lateral	95345-1	Isolated	knopfleri	Smith et al., 2005	Maevarano Formation	Berivotra Village	Majunga Basin	Madagascar	Maastrichtian	Late Cretaceous	?	/	Isolated	Lateral	5.3	2.28	6.96	8.18	0.430189	1.31321	?	?	?	?	?	?	?	?	?	?	?	?	?	?	?	56.25	0.01	30	30	30	26	25	26	30	25.6667
122	Masiakasaurus	Masiakasaurus lateral	Noasauridae	Noasauridae Lateral	99016	Isolated	knopfleri	Smith et al., 2005	Maevarano Formation	Berivotra Village	Majunga Basin	Madagascar	Maastrichtian	Late Cretaceous	?	/	Isolated	Lateral	6.15	3.02	14.25	13.51	0.491057	2.31707	?	?	?	?	?	?	?	?	?	?	?	?	?	?	?	76.08	0.32	22.5	25	27.5	27.5	22.5	17.5	25	22.5
123	Masiakasaurus	Masiakasaurus lateral	Noasauridae	Noasauridae Lateral	95358	Isolated	knopfleri	Smith et al., 2005	Maevarano Formation	Berivotra Village	Majunga Basin	Madagascar	Maastrichtian	Late Cretaceous	?	/	Isolated	Lateral	2.81	2.2	5.87	6	0.782918	2.08897	?	?	?	?	?	?	?	?	?	?	?	?	?	?	?	49.89	0.17	?	?	?	?	?	?	35	32
124	Masiakasaurus	Masiakasaurus lateral	Noasauridae	Noasauridae Lateral	95244-1	Isolated	knopfleri	Smith et al., 2005	Maevarano Formation	Berivotra Village	Majunga Basin	Madagascar	Maastrichtian	Late Cretaceous	?	/	Isolated	Lateral	3.27	1.93	6.52	6.83	0.590214	1.99388	?	?	?	?	?	?	?	?	?	?	?	?	?	?	?	53.69	0.17	?	?	?	?	?	?	35	30
125	Masiakasaurus	Masiakasaurus lateral	Noasauridae	Noasauridae Lateral	98313-1	Isolated	knopfleri	Smith et al., 2005	Maevarano Formation	Berivotra Village	Majunga Basin	Madagascar	Maastrichtian	Late Cretaceous	?	/	Isolated	Lateral	7.09	3.48	10.44	11.67	0.490832	1.4725	?	?	?	?	?	?	?	?	?	?	?	?	?	?	?	68.19	0.1	25	17.5	16	20	18.5	20	19.5	19.5
126	Masiakasaurus	Masiakasaurus lateral	Noasauridae	Noasauridae Lateral	98203	Isolated	knopfleri	Smith et al., 2005	Maevarano Formation	Berivotra Village	Majunga Basin	Madagascar	Maastrichtian	Late Cretaceous	?	/	Isolated	Lateral	4.62	2.5	11.64	12.14	0.541126	2.51948	?	?	?	?	?	?	?	?	?	?	?	?	?	?	?	70.29	0.29	25	30	/	/	15	22.5	27.5	18.8
127	Masiakasaurus	Masiakasaurus lateral	Noasauridae	Noasauridae Lateral	93086-4	Isolated	knopfleri	Smith et al., 2005	Maevarano Formation	Berivotra Village	Majunga Basin	Madagascar	Maastrichtian	Late Cretaceous	?	/	Isolated	Lateral	4.94	2.42	8.58	9.49	0.489879	1.73684	?	?	?	?	?	?	?	?	?	?	?	?	?	?	?	62.55	0.14	40	/	/	22.5	20	/		21.3
128	Masiakasaurus	Masiakasaurus lateral	Noasauridae	Noasauridae Lateral	95435	Isolated	knopfleri	Smith et al., 2005	Maevarano Formation	Berivotra Village	Majunga Basin	Madagascar	Maastrichtian	Late Cretaceous	?	/	Isolated	Lateral	4.94	2.42	6.8	8.2	0.489879	1.37652	?	?	?	?	?	?	?	?	?	?	?	?	?	?	?	54.67	-0.01	35	22.5	30	23.8	20	23.8	29.2	22.5
129	Masiakasaurus	Masiakasaurus lateral	Noasauridae	Noasauridae Lateral	96068-4	Isolated	knopfleri	Smith et al., 2005	Maevarano Formation	Berivotra Village	Majunga Basin	Madagascar	Maastrichtian	Late Cretaceous	?	/	Isolated	Lateral	5.47	2.22	8.86	10.15	0.40585	1.61974	?	?	?	?	?	?	?	?	?	?	?	?	?	?	?	63.27	0.08	27.5	26.3	25	20	16.7	17.5	26.3	18.1
130	Masiakasaurus	Masiakasaurus lateral	Noasauridae	Noasauridae Lateral	MSNM V 5378	Isolated	knopfleri	Fanti & Therrien, 2007	Maevarano Formation	Berivotra Village	Majunga Basin	Madagascar	Maastrichtian	Late Cretaceous	?	/	Isolated	Lateral	5.15	3.03	13.34	?	1.7	0.4	?	?	?	?	?	?	?	?	?	?	?	?	?	?	?	?	?	?	25	?	?	15	?	25	15
131	Arcovenator	Arcovenator lateral	Abelisauridae	Abelisauridae Lateral	MHNA.PV.2011.12.15 (holotype)	Isolated	escotae	Young et al., 2019 (C.H. pers. measurements)	Lower Argiles Rutilantes Formation	Jas Neuf Sud locality, Pourrières	Var Department	France	Late Campanian	Late Cretaceous	?	/	Isolated	Lateral	15.11	8.79	34.98	34.04	0.581734	2.31502	13.05	8.19	0.627586	?	?	?	0	absent	?	absent	absent	?	?	?	?	?	?	?	15	20	?	12	16.25	17.5	14.125
132	Arcovenator	Arcovenator lateral	Abelisauridae	Abelisauridae Lateral	MHNA.PV.2011.12.187 (referred)	Isolated	escotae	Young et al., 2019 (C.H. pers. measurements)	Lower Argiles Rutilantes Formation	Jas Neuf Sud locality, Pourrières	Var Department	France	Late Campanian	Late Cretaceous	?	/	Isolated	Lateral	19.82	9.55	46.37	48.96	0.481837	2.33956	16.22	8.52	0.525277	?	?	?	0	absent	?	absent	absent	?	?	?	?	?	?	16	16.25	?	?	12.5	?	16.125	12.5
133	Abelisaurus	Abelisaurus mesial	Abelisauridae	Abelisauridae Mesial	MC 1	Isolated	comahuensis?	Hendrickx et al., 2015	Anacleto Formation	Lago Pellegrini stone quarries	General Roca department, Río Negro Province	Argentina	early–middle Campanian	Late Cretaceous	Adult?	Mesial tooth	Isolated	Mesial	9.11	5.61	14.18	15.48	0.615807	1.55653	7.7	4.24	0.550649	0	15.48	100	0	absent	absent, concavity adjacent to mesial carina	absent	absent	?	?	?	?	?	?	?	11	12.5	12	12	13	7.83333	12.3333
134	Abelisaurus	Abelisaurus mesial	Abelisauridae	Abelisauridae Mesial	MC 5	Isolated	comahuensis?	Hendrickx et al., 2015	Anacleto Formation	Lago Pellegrini stone quarries	General Roca department, Río Negro Province	Argentina	early–middle Campanian	Late Cretaceous	Adult?	Mesial tooth	Isolated	Mesial	11.58	6.88	22.61	23.41	0.594128	1.9525	10.52	5.2	0.494297	0	23.41	100	4	well developped lingually	DC, medium	absent	absent	?	?	?	?	?	?	?	10.5	14	11.25	10	13	8.16667	11.4167
135	Abelisaurus	Abelisaurus mesial	Abelisauridae	Abelisauridae Mesial	MC 267	Isolated	comahuensis?	Hendrickx et al., 2015	Anacleto Formation	Lago Pellegrini stone quarries	General Roca department, Río Negro Province	Argentina	early–middle Campanian	Late Cretaceous	Adult?	Mesial tooth	Isolated	Mesial	9.2	4.81	11.21	12.88	0.522826	1.21848	7.29	3.76	0.515775	0	12.88	100	0	absent	DC well developped; concavity adjacent to medial carina	absent	absent	?	?	?	?	?	?	?	10	10	10	10	?	6.66667	6.66667
136	Abelisaurus	Abelisaurus lateral	Abelisauridae	Abelisauridae Lateral	MC 689 (sure, see photo of F. Novas)	Isolated	comahuensis	Hendrickx et al., 2015	Anacleto Formation	Lago Pellegrini stone quarries	General Roca department, Río Negro Province	Argentina	early–middle Campanian	Late Cretaceous	Adult?	/	Isolated	Lateral	19.55	9.38	24.28	26.61	0.479795	1.24194	12.79	8.74	0.683346	0	26.61	100	0	absent	absent	absent	absent	?	?	?	?	?	?	11	10.5	10.5	12	10	11.5	10.6667	11.1667
137	Abelisaurus	Abelisaurus lateral	Abelisauridae	Abelisauridae Lateral	MC 709 (230)	Isolated	comahuensis?	Hendrickx et al., 2015	Anacleto Formation	Lago Pellegrini stone quarries	General Roca department, Río Negro Province	Argentina	early–middle Campanian	Late Cretaceous	Adult?	/	Isolated	Lateral	17.06	9.82	24.08	28.07	0.575615	1.41149	14.29	8.05	0.563331	0	28.07	100	0	absent	absent	absent	absent	?	?	?	?	?	?	?	15	17.5	13	13	14	10.8333	13.3333
138	Rugops	Rugops lateral	Abelisauridae	Abelisauridae Lateral	MNN IGU1	mx4	primus	Smith & Lamanna, 2006	Echkar Formation	Abangharit	Département d'Agadez	Niger	Cenomanian	'Middle Cretaceous'	?	Left	mx4	Lateral	11.63	4.56	13.23	17.24	0.392089	1.13758	?	?	?	?	?	?	?	?	?	?	?	?	?	?	?	72.3	-0.019	?	?	?	?	12	?	?	12
139	Indosuchus	Indosuchus mesial	Abelisauridae	Abelisauridae Mesial	AMNH 1753	pmx1	raptorius	Hendrickx et al., 2015	Lameta Formation	Bara Simla Hill, Jabalpur	Madhya Pradesh	India	Maastrichtian	Late Cretaceous	Adult?	Right	pmx1	Mesial	12.9	12.9	20	24.1	1	1.55039	11.9	10.4	0.87395	0	24.1	100	0	absent	absent	absent	absent	?	?	?	?	?	?	8.33	7.5	8.33	7.5	6.66	?	8.05	7.08
140	Indosuchus	Indosuchus mesial	Abelisauridae	Abelisauridae Mesial	AMNH 1753	pmx2	raptorius	Hendrickx et al., 2015	Lameta Formation	Bara Simla Hill, Jabalpur	Madhya Pradesh	India	Maastrichtian	Late Cretaceous	Adult?	Right	pmx2	Mesial	16	13.2	30	31	0.825	1.875	14	9.8	0.7	0	31	100	0	absent	absent	absent	absent	?	?	?	?	?	?	?	9	8	8.33	9	7.5	8.5	8.27
141	Indosuchus	Indosuchus mesial	Abelisauridae	Abelisauridae Mesial	AMNH 1753	pmx3	raptorius	Hendrickx et al., 2015	Lameta Formation	Bara Simla Hill, Jabalpur	Madhya Pradesh	India	Maastrichtian	Late Cretaceous	Adult?	Left	pmx3	Mesial	16	10	27	29	0.625	1.6875	14.1	8.7	0.617021	0	29	100	0	absent	absent	absent	absent	?	?	?	?	?	?	?	8.5	8.75	7.5	10	?	8.625	8.75
142	Indosuchus	Indosuchus mesial	Abelisauridae	Abelisauridae Mesial	AMNH 1753	pmx4	raptorius	Hendrickx et al., 2015	Lameta Formation	Bara Simla Hill, Jabalpur	Madhya Pradesh	India	Maastrichtian	Late Cretaceous	Adult?	Left	pmx4	Mesial	16.6	13.3	29.1	36	0.801205	1.75301	15.1	9.8	0.649007	0	36	100	0	absent	DC, short	absent	absent	?	?	?	?	?	?	?	8.75	?	9.16	8.5	?	8.95	8.83
143	Indosuchus	Indosuchus lateral	Abelisauridae	Abelisauridae Lateral	AMNH 1753	mx08	raptorius	Smith et al., 2005	Lameta Formation	Jabalpur	Madhya Pradesh	India	Maastrichtian	Late Cretaceous	Adult?	Left	mx08	Lateral	19.47	9.1	29.4	31.5	0.467386	1.51002	?	?	?	?	?	?	?	?	?	?	?	?	?	?	?	82.53	-0.01	/	10	16.7	/	12	/	13.4	12
144	Indosuchus	Indosuchus mesial	Abelisauridae	Abelisauridae Mesial	AMNH 1753	pm02	raptorius	Smith et al., 2005	Lameta Formation	Jabalpur	Madhya Pradesh	India	Maastrichtian	Late Cretaceous	Adult?	Left	pm02	Mesial	17.3	12.99	26.9	28.5	0.750867	1.55491	?	?	?	?	?	?	?	?	?	?	?	?	?	?	?	81.86	0.04	/	11.5	16	13	11	/	13.8	12
145	Indosuchus	Indosuchus mesial	Abelisauridae	Abelisauridae Mesial	AMNH 1753	pm03	raptorius	Smith et al., 2005	Lameta Formation	Jabalpur	Madhya Pradesh	India	Maastrichtian	Late Cretaceous	Adult?	Left	pm03	Mesial	16.59	10.66	27.26	29.48	0.642556	1.64316	?	?	?	?	?	?	?	?	?	?	?	?	?	?	?	81.83	0.05	11	10	/	10	/	13	10.5	11.5
146	Indosuchus	Indosuchus mesial	Abelisauridae	Abelisauridae Mesial	AMNH 1753	pm04	raptorius	Smith et al., 2005	Lameta Formation	Jabalpur	Madhya Pradesh	India	Maastrichtian	Late Cretaceous	Adult?	Left	pm04	Mesial	17.33	12.85	28.02	32.05	0.741489	1.61685	?	?	?	?	?	?	?	?	?	?	?	?	?	?	?	81.83	0.02	/	/	12	9	/	10	12	10
147	Indosuchus	Indosuchus mesial	Abelisauridae	Abelisauridae Mesial	AMNH 1753	pm01	raptorius	Smith et al., 2005	Lameta Formation	Jabalpur	Madhya Pradesh	India	Maastrichtian	Late Cretaceous	Adult?	Right	pm01	Mesial	13.55	10.54	26	29	0.77786	1.91882	?	?	?	?	?	?	?	?	?	?	?	?	?	?	?	81.05	0.09	8.8	8	9.5	8	/	/	8.8	10
148	Indosuchus	Indosuchus mesial	Abelisauridae	Abelisauridae Mesial	AMNH 1753	pm02	raptorius	Smith et al., 2005	Lameta Formation	Jabalpur	Madhya Pradesh	India	Maastrichtian	Late Cretaceous	Adult?	Right	pm02	Mesial	15.99	11.96	31.86	32.01	0.747967	1.9925	?	?	?	?	?	?	?	?	?	?	?	?	?	?	?	83.31	0.08	/	8	9	8.5	10	/	8.5	9.3
149	Chenanisaurus	Chenanisaurus mesial	Abelisauridae	Abelisauridae Mesial	OCP 457	Isolated, pm	barbaricus	Longrich et al., 2017	Couche III	Sidi Daoui	Ouled Abdoun Basin	Morocco	upper Maastrichtian	Late Cretaceous	?	/	Mesial, pm	Mesial	20.6	14.3	44.1	47.2	0.694175	2.14078	?	?	?	?	?	?	?	?	?	?	?	?	?	?	?	70	?	8.5	8	~12	8	8	13	9.5	9.67
150	Chenanisaurus	Chenanisaurus mesial	Abelisauridae	Abelisauridae Mesial	OCP 458	Isolated, pm	barbaricus	Longrich et al., 2017	Couche III	Sidi Daoui	Ouled Abdoun Basin	Morocco	upper Maastrichtian	Late Cretaceous	?	/	Mesial, pm	Mesial	20	15.2	42.6	42.8	0.76	2.13	?	?	?	?	?	?	?	?	?	?	?	?	?	?	?	75	?	?	?	?	?	?	?	?	?
151	Chenanisaurus	Chenanisaurus lateral	Abelisauridae	Abelisauridae Lateral	WDC-CCPM-005	Isolated, lateral (measurements taken with ImageJ)	barbaricus	Buffetaut et al., 2005	Couche III	Sidi Daoui or Sidi Chennane	Ouled Abdoun Basin	Morocco	upper Maastrichtian	Late Cretaceous	?	/	Lateral	Lateral	19	10	39	41.5	0.526316	2.05263	?	?	?	?	?	?	?	?	?	?	?	?	?	?	?	?	?	?	10	?	?	10	?	?	?
152	Majungasaurus	Majungasaurus mesial	Abelisauridae	Abelisauridae Mesial	FMNH PR 2100	pm01	crenatissimus	Young et al., 2019 (C.H. pers. measurements)	Maevarano Formation	Berivotra Village	Majunga Basin	Madagascar	Maastrichtian	Late Cretaceous	Adult or near adult	Right	pmx1, not taken at the cervix	Mesial	12.16	10.94	19.64	21.41	0.899671	1.61513	9.11	6.73	0.738749	0	21.41	100	0	absent	M and D short on lingual and lingual for D	absent	absent	?	?	?	?	?	?	6.25	7	?	7.5	8.5	?	6.625	8
153	Majungasaurus	Majungasaurus mesial	Abelisauridae	Abelisauridae Mesial	FMNH PR 2100	pm02	crenatissimus	Young et al., 2019 (C.H. pers. measurements)	Maevarano Formation	Berivotra Village	Majunga Basin	Madagascar	Maastrichtian	Late Cretaceous	Adult or near adult	Right	pmx2, not taken at the cervix	Mesial	15.01	12.45	27.85	26.65	0.829447	1.85543	12.01	7.98	0.664446	0	26.65	100	0	absent	D medium on labial	absent	absent	?	?	?	?	?	?	7	7.5	9	8	8.5	9.68	7.83	8.73
154	Majungasaurus	Majungasaurus mesial	Abelisauridae	Abelisauridae Mesial	FMNH PR 2100	pm03	crenatissimus	Young et al., 2019 (C.H. pers. measurements)	Maevarano Formation	Berivotra Village	Majunga Basin	Madagascar	Maastrichtian	Late Cretaceous	Adult or near adult	Right	pmx3, not taken at the cervix	Mesial	15.3	8.79	23.85	23.25	0.57451	1.55882	10.3	6.94	0.673786	0	23.25	100	0	absent	short to medium on M and D	absent	absent	?	?	?	?	?	?	7	7.5	?	7	7.5	?	7.25	7.25
155	Majungasaurus	Majungasaurus mesial	Abelisauridae	Abelisauridae Mesial	FMNH PR 2100	pm04	crenatissimus	Young et al., 2019 (C.H. pers. measurements)	Maevarano Formation	Berivotra Village	Majunga Basin	Madagascar	Maastrichtian	Late Cretaceous	Adult or near adult	Right	pmx4, not taken at the cervix	Mesial	14.9	8.32	31.8	20.94	0.558389	2.13423	12.18	7.89	0.647783	0	20.94	100	0	absent	short to medium on DB labial	absent	absent	?	?	?	?	?	?	7.5	7	8.125	8.5	8	10.62	7.54	9.04
156	Majungasaurus	Majungasaurus lateral	Abelisauridae	Abelisauridae Lateral	FMNH PR 2100	mx04	crenatissimus	Young et al., 2019 (C.H. pers. measurements)	Maevarano Formation	Berivotra Village	Majunga Basin	Madagascar	Maastrichtian	Late Cretaceous	Adult or near adult	Left	mx04	Lateral	17.93	9.16	33.41	37.23	0.510876	1.86336	15.63	8.17	0.522713	0	37.23	100	2	very tenuous on lingual	well developped on D lingual and labial, M short to absent	absent	absent	?	?	?	?	?	?	8.5	9.25	10.625	9.5	9.5	10	9.46	9.66
157	Majungasaurus	Majungasaurus lateral	Abelisauridae	Abelisauridae Lateral	FMNH PR 2100	mx06	crenatissimus	Young et al., 2019 (C.H. pers. measurements)	Maevarano Formation	Berivotra Village	Majunga Basin	Madagascar	Maastrichtian	Late Cretaceous	Adult or near adult	Left	mx06	Lateral	18.13	9.39	35.08	37.74	0.517926	1.93491	15.54	7.6	0.48906	0	37.74	100	3	tenuous on labial close to DC	well developped on D lingual, medium on labial	absent	absent	?	?	?	?	?	?	8.5	9.5	8.75	9	9	10	8.91	9.33
158	Majungasaurus	Majungasaurus lateral	Abelisauridae	Abelisauridae Lateral	FMNH PR 2100	mx05	crenatissimus	Young et al., 2019 (C.H. pers. measurements)	Maevarano Formation	Berivotra Village	Majunga Basin	Madagascar	Maastrichtian	Late Cretaceous	Adult or near adult	Right	mx05	Lateral	18.7	8.4	30.98	37.87	0.449198	1.65668	14.87	7.44	0.500336	0	37.87	100	2	very tenous basal lingual	medium to well developped on D lingual and labial	absent	absent	?	?	?	?	?	?	?	8.5	8.75	9	8	9.16	8.62	8.72
159	Majungasaurus	Majungasaurus lateral	Abelisauridae	Abelisauridae Lateral	FMNH PR 2100	mx07	crenatissimus	Young et al., 2019 (C.H. pers. measurements)	Maevarano Formation	Berivotra Village	Majunga Basin	Madagascar	Maastrichtian	Late Cretaceous	Adult or near adult	Right	mx07	Lateral	18.47	8.9	34.86	38.93	0.481862	1.88738	15.08	7.22	0.47878	0	38.93	100	2	extremely tenous basal lingual	D medium on lingual, well-developped on labial	absent	absent	?	?	?	?	?	?	9.375	9	?	9	8.5	10	9.18	9.16
160	Majungasaurus	Majungasaurus mesial	Abelisauridae	Abelisauridae Mesial	FMNH PR 2100	d01	crenatissimus	Young et al., 2019 (C.H. pers. measurements)	Maevarano Formation	Berivotra Village	Majunga Basin	Madagascar	Maastrichtian	Late Cretaceous	Adult or near adult	Left	d01	Mesial	8.56	7.34	14.8	15.38	0.857477	1.72897	6.75	5.03	0.745185	0	15.38	100	0	absent	D short lingual	absent	absent	?	?	?	?	?	?	7.5	8	9	7	8.5	10	8.17	8.5
161	Majungasaurus	Majungasaurus lateral	Abelisauridae	Abelisauridae Lateral	FMNH PR 2100	d05	crenatissimus	Young et al., 2019 (C.H. pers. measurements)	Maevarano Formation	Berivotra Village	Majunga Basin	Madagascar	Maastrichtian	Late Cretaceous	Adult or near adult	Left	d05	Lateral	13.1	8.91	27.14	30.32	0.680153	2.07176	12.25	6.85	0.559184	0	30.32	100	1	tenuous on labial	D medium labial	absent	absent	?	?	?	?	?	?	10.83	9.16	12.5	10	9.5	13.75	10.83	11.08
162	Majungasaurus	Majungasaurus lateral	Abelisauridae	Abelisauridae Lateral	FMNH PR 2100	d07	crenatissimus	Young et al., 2019 (C.H. pers. measurements)	Maevarano Formation	Berivotra Village	Majunga Basin	Madagascar	Maastrichtian	Late Cretaceous	Adult or near adult	Left	d07	Lateral	13.9	7.58	24.4	27.98	0.545324	1.7554	11.89	6.14	0.5164	0	27.98	100	2 or 3	very tenous close to DC on labial	?	absent	absent	?	?	?	?	?	?	7.5	9.5	12.5	10.5	10	15	9.83	11.83
163	Majungasaurus	Majungasaurus lateral	Abelisauridae	Abelisauridae Lateral	FMNH PR 2100	d12	crenatissimus	Young et al., 2019 (C.H. pers. measurements)	Maevarano Formation	Berivotra Village	Majunga Basin	Madagascar	Maastrichtian	Late Cretaceous	Adult or near adult	Left	d12	Lateral	12.56	6.77	20.95	25.33	0.539013	1.66799	11.36	5.58	0.491197	0	25.33	100	0	absent	D short to absent	absent	absent	?	?	?	?	?	?	8.33	10	15	8.33	10	11.66	11.11	10
164	Majungasaurus	Majungasaurus lateral	Abelisauridae	Abelisauridae Lateral	FMNH PR 2100	d13	crenatissimus	Young et al., 2019 (C.H. pers. measurements)	Maevarano Formation	Berivotra Village	Majunga Basin	Madagascar	Maastrichtian	Late Cretaceous	Adult or near adult	Left	d13	Lateral	12.27	6.45	19.84	23.61	0.525672	1.61695	11.29	5.42	0.480071	0	23.61	100	0	absent	D short to absent	absent	absent	?	?	?	?	?	?	12.5	11.66	?	13.75	10	10	12.08	11.25
165	Majungasaurus	Majungasaurus lateral	Abelisauridae	Abelisauridae Lateral	FMNH PR 2100	d14	crenatissimus	Young et al., 2019 (C.H. pers. measurements)	Maevarano Formation	Berivotra Village	Majunga Basin	Madagascar	Maastrichtian	Late Cretaceous	Adult or near adult	Left	d14	Lateral	11.73	5.99	18.08	25.8	0.510656	1.54135	11.56	5.46	0.472318	0	25.8	100	0	absent	D short to absent	absent	absent	?	?	?	?	?	?	?	?	14	12.5	10.62	11.66	13.25	11.59
166	Majungasaurus	Majungasaurus lateral	Abelisauridae	Abelisauridae Lateral	FMNH PR 2100	d15	crenatissimus	Young et al., 2019 (C.H. pers. measurements)	Maevarano Formation	Berivotra Village	Majunga Basin	Madagascar	Maastrichtian	Late Cretaceous	Adult or near adult	Left	d15	Lateral	11.49	5.89	18.57	20.86	0.51262	1.61619	10.63	5.1	0.479774	0	20.86	100	0	absent	D short to absent	absent	absent	?	?	?	?	?	?	?	11.66	?	?	11.25	11.66	11.66	11.455
167	Majungasaurus	Majungasaurus lateral	Abelisauridae	Abelisauridae Lateral	FMNH PR 2100	d02	crenatissimus	Young et al., 2019 (C.H. pers. measurements)	Maevarano Formation	Berivotra Village	Majunga Basin	Madagascar	Maastrichtian	Late Cretaceous	Adult or near adult	Right	d02	Lateral	10.79	8.22	22.91	22.16	0.761816	2.12326	9.38	6.35	0.676972	0	22.16	100	0	absent	D well developped on lingual	absent	absent	?	?	?	?	?	?	11	8	11.875	10	8	10	10.29	9.33
168	Majungasaurus	Majungasaurus lateral	Abelisauridae	Abelisauridae Lateral	FMNH PR 2100	d03	crenatissimus	Young et al., 2019 (C.H. pers. measurements)	Maevarano Formation	Berivotra Village	Majunga Basin	Madagascar	Maastrichtian	Late Cretaceous	Adult or near adult	Right	d03	Lateral	13.02	8.38	22.86	24.03	0.643625	1.75576	10.78	6.11	0.56679	0	24.03	100	0	absent	D well developped on lingual	absent	absent	?	?	?	?	?	?	9.5	9	9.5	9.375	9	9.16	9.33	9.18
169	Majungasaurus	Majungasaurus lateral	Abelisauridae	Abelisauridae Lateral	FMNH PR 2100	d04	crenatissimus	Young et al., 2019 (C.H. pers. measurements)	Maevarano Formation	Berivotra Village	Majunga Basin	Madagascar	Maastrichtian	Late Cretaceous	Adult or near adult	Right	d04	Lateral	14.63	7.85	23.03	23.85	0.536569	1.57416	11.21	5.76	0.513827	0	23.85	100	0	absent	D medium on lingual	absent	absent	?	?	?	?	?	?	10	9.375	10	10	9	8.125	9.79	9.04
170	Majungasaurus	Majungasaurus lateral	Abelisauridae	Abelisauridae Lateral	FMNH PR 2100	d05	crenatissimus	Young et al., 2019 (C.H. pers. measurements)	Maevarano Formation	Berivotra Village	Majunga Basin	Madagascar	Maastrichtian	Late Cretaceous	Adult or near adult	Right	d05	Lateral	14.22	7.87	21.53	24.52	0.553446	1.51406	10.77	5.57	0.517177	0	24.52	100	0	absent	D medium on lingual and labial	absent	absent	?	?	?	?	?	?	10	8.33	11.25	10.625	9.5	10	9.86	10.04
171	Majungasaurus	Majungasaurus lateral	Abelisauridae	Abelisauridae Lateral	FMNH PR 2100	d06	crenatissimus	Young et al., 2019 (C.H. pers. measurements)	Maevarano Formation	Berivotra Village	Majunga Basin	Madagascar	Maastrichtian	Late Cretaceous	Adult or near adult	Right	d06	Lateral	13.67	7.82	24.99	27.11	0.572056	1.82809	11.25	5.76	0.512	0	27.11	100	0	absent	D medium on lingual	absent	absent	?	?	?	?	?	?	10	9.5	10.5	10	10	12.5	10	10.83
172	Majungasaurus	Majungasaurus lateral	Abelisauridae	Abelisauridae Lateral	FMNH PR 2100	d10	crenatissimus	Young et al., 2019 (C.H. pers. measurements)	Maevarano Formation	Berivotra Village	Majunga Basin	Madagascar	Maastrichtian	Late Cretaceous	Adult or near adult	Right	d10	Lateral	12.96	8.45	24.57	28.1	0.652006	1.89583	12.36	6.8	0.550162	0	28.1	100	1 or 2	extremely tenous on labial	D medium to well developped on lingual	absent	absent	?	?	?	?	?	?	?	10.83	11.25	12	10	11	11.04	11
173	Majungasaurus	Majungasaurus lateral	Abelisauridae	Abelisauridae Lateral	FMNH PR 2100	d11	crenatissimus	Young et al., 2019 (C.H. pers. measurements)	Maevarano Formation	Berivotra Village	Majunga Basin	Madagascar	Maastrichtian	Late Cretaceous	Adult or near adult	Right	d11	Lateral	12.82	6.94	22.76	28.16	0.541342	1.77535	12.13	6.29	0.518549	0	28.16	100	0	absent	D medium on lingual	absent	absent	?	?	?	?	?	?	12.5	11	13.75	12	10.5	13	12.42	11.83
174	Majungasaurus	Majungasaurus lateral	Abelisauridae	Abelisauridae Lateral	FMNH PR 2100	d15	crenatissimus	Young et al., 2019 (C.H. pers. measurements)	Maevarano Formation	Berivotra Village	Majunga Basin	Madagascar	Maastrichtian	Late Cretaceous	Adult or near adult	Right	d13	Lateral	11.07	6.07	18.78	20.72	0.548329	1.69648	10.34	4.99	0.482592	0	20.72	100	0	absent	D short on lingual	absent	absent	?	?	?	?	?	?	?	11.66	?	13.33	11.66	16.25	10	13.75
175	Majungasaurus	Majungasaurus mesial	Abelisauridae	Abelisauridae Mesial	FMNH PR2008	pm02	crenatissimus	Smith et al., 2005	Maevarano Formation	Berivotra Village	Majunga Basin	Madagascar	Maastrichtian	Late Cretaceous	?	Right	pm02	Mesial	12.99	9.46	30.11	31.92	0.73	2.32	?	?	?	?	?	?	?	?	?	?	?	?	?	?	?	82.42	0.17	12	11	16	11	12	12	13	12.5
176	Majungasaurus	Majungasaurus mesial	Abelisauridae	Abelisauridae Mesial	UA 8716	pm02	crenatissimus	Smith et al., 2005	Maevarano Formation	Berivotra Village	Majunga Basin	Madagascar	Maastrichtian	Late Cretaceous	?	Right	pm02	Mesial	12.41	9.26	27.05	27.84	0.75	2.18	?	?	?	?	?	?	?	?	?	?	?	?	?	?	?	81.89	0.15	9	10	15	8.8	10	9	11.3	10.9
177	Majungasaurus	Majungasaurus mesial	Abelisauridae	Abelisauridae Mesial	UA 8716	pm04	crenatissimus	Smith et al., 2005	Maevarano Formation	Berivotra Village	Majunga Basin	Madagascar	Maastrichtian	Late Cretaceous	?	Right	pm04	Mesial	12.51	8.3	27.69	30.73	0.66	2.21	?	?	?	?	?	?	?	?	?	?	?	?	?	?	?	81.41	0.15	10	10	16	11	11	10	12	12
178	Majungasaurus	Majungasaurus mesial	Abelisauridae	Abelisauridae Mesial	FMNH PR2100	pm01	crenatissimus	Smith et al., 2005	Maevarano Formation	Berivotra Village	Majunga Basin	Madagascar	Maastrichtian	Late Cretaceous	Adult or near adult	Right	pm01	Mesial	12.08	11.09	31.52	33.67	0.92	2.61	?	?	?	?	?	?	?	?	?	?	?	?	?	?	?	82.57	?	8	8.5	?	10	9	8	?	?
179	Majungasaurus	Majungasaurus mesial	Abelisauridae	Abelisauridae Mesial	FMNH PR2100	pm02	crenatissimus	Smith et al., 2005	Maevarano Formation	Berivotra Village	Majunga Basin	Madagascar	Maastrichtian	Late Cretaceous	Adult or near adult	Right	pm02	Mesial	14.81	11.72	32.38	?	0.79	2.19	?	?	?	?	?	?	?	?	?	?	?	?	?	?	?	8.5	?	9	9	?	8.5	8.5	?	?	?
180	Majungasaurus	Majungasaurus mesial	Abelisauridae	Abelisauridae Mesial	FMNH PR2100	pm04	crenatissimus	Smith et al., 2005	Maevarano Formation	Berivotra Village	Majunga Basin	Madagascar	Maastrichtian	Late Cretaceous	Adult or near adult	Right	pm04	Mesial	14.6	9.13	31.68	?	0.63	2.17	?	?	?	?	?	?	?	?	?	?	?	?	?	?	?	?	?	9	9.5	?	9.5	9.8	9	?	?
181	Majungasaurus	Majungasaurus mesial	Abelisauridae	Abelisauridae Mesial	FMNH PR2100	mx02	crenatissimus	Smith et al., 2005	Maevarano Formation	Berivotra Village	Majunga Basin	Madagascar	Maastrichtian	Late Cretaceous	Adult or near adult	Left	mx02	Lateral	16.76	9.85	?	33.18	0.59	?	?	?	?	?	?	?	?	?	?	?	?	?	?	?	?	?	?	9	8.5	9.5	8.5	9	9	9	9.9
182	Majungasaurus	Majungasaurus lateral	Abelisauridae	Abelisauridae Lateral	FMNH PR2100	mx04	crenatissimus	Smith et al., 2005	Maevarano Formation	Berivotra Village	Majunga Basin	Madagascar	Maastrichtian	Late Cretaceous	Adult or near adult	Left	mx04	Lateral	18.3	8.62	36.9	39.33	0.47	2.02	?	?	?	?	?	?	?	?	?	?	?	?	?	?	?	83.89	0.04	9	8.5	11	10	9	9	9.4	10
183	Majungasaurus	Majungasaurus lateral	Abelisauridae	Abelisauridae Lateral	FMNH PR2100	mx06	crenatissimus	Smith et al., 2005	Maevarano Formation	Berivotra Village	Majunga Basin	Madagascar	Maastrichtian	Late Cretaceous	Adult or near adult	Left	mx06	Lateral	18.37	9.21	38.08	39.87	0.5	2.07	?	?	?	?	?	?	?	?	?	?	?	?	?	?	?	84.16	0.05	11	9.5	10	10	9	11	10	10
184	Majungasaurus	Majungasaurus lateral	Abelisauridae	Abelisauridae Lateral	FMNH PR2100	mx01	crenatissimus	Smith et al., 2005	Maevarano Formation	Berivotra Village	Majunga Basin	Madagascar	Maastrichtian	Late Cretaceous	Adult or near adult	Right	mx01	Lateral	14.57	6.64	?	31.74	0.46	?	?	?	?	?	?	?	?	?	?	?	?	?	?	?	?	?	?	9	8.5	10	10	9	?	?	?
185	Majungasaurus	Majungasaurus lateral	Abelisauridae	Abelisauridae Lateral	FMNH PR2100	mx03	crenatissimus	Smith et al., 2005	Maevarano Formation	Berivotra Village	Majunga Basin	Madagascar	Maastrichtian	Late Cretaceous	Adult or near adult	Right	mx03	Lateral	17.99	8.49	30	?	0.47	1.67	?	?	?	?	?	?	?	?	?	?	?	?	?	?	?	?	?	8	8	9.5	8.5	7.5	8	8.5	8.6
186	Majungasaurus	Majungasaurus lateral	Abelisauridae	Abelisauridae Lateral	FMNH PR2100	mx05	crenatissimus	Smith et al., 2005	Maevarano Formation	Berivotra Village	Majunga Basin	Madagascar	Maastrichtian	Late Cretaceous	Adult or near adult	Right	mx05	Lateral	18.93	8.86	35.54	41.69	0.47	1.88	?	?	?	?	?	?	?	?	?	?	?	?	?	?	?	83.26	0.02	8.3	10	12	9.5	10	8.3	10.1	10.3
187	Majungasaurus	Majungasaurus lateral	Abelisauridae	Abelisauridae Lateral	FMNH PR2100	mx07	crenatissimus	Smith et al., 2005	Maevarano Formation	Berivotra Village	Majunga Basin	Madagascar	Maastrichtian	Late Cretaceous	Adult or near adult	Right	mx07	Lateral	18.17	9.1	38.68	44.19	0.5	2.13	?	?	?	?	?	?	?	?	?	?	?	?	?	?	?	83.76	0.04	9	9.7	11	9.5	9	9	9.9	9.5
188	Majungasaurus	Majungasaurus lateral	Abelisauridae	Abelisauridae Lateral	FMNH PR2100	mx09	crenatissimus	Smith et al., 2005	Maevarano Formation	Berivotra Village	Majunga Basin	Madagascar	Maastrichtian	Late Cretaceous	Adult or near adult	Right	mx09	Lateral	16.34	6.54	29.36	31.77	0.4	1.8	?	?	?	?	?	?	?	?	?	?	?	?	?	?	?	82.33	?	9.5	10	?	10	9.5	9.5	?	?
189	Majungasaurus	Majungasaurus lateral	Abelisauridae	Abelisauridae Lateral	FMNH PR2100	mx17	crenatissimus	Smith et al., 2005	Maevarano Formation	Berivotra Village	Majunga Basin	Madagascar	Maastrichtian	Late Cretaceous	Adult or near adult	Right	mx17	Lateral	7.88	3.47	12.45	13.8	0.44	1.58	?	?	?	?	?	?	?	?	?	?	?	?	?	?	?	71.72	0.08	14	12	15	13	14	14	13.5	14
190	Majungasaurus	Majungasaurus mesial	Abelisauridae	Abelisauridae Mesial	FMNH PR2100	d01	crenatissimus	Smith et al., 2005	Maevarano Formation	Berivotra Village	Majunga Basin	Madagascar	Maastrichtian	Late Cretaceous	Adult or near adult	Left	d01	Mesial	8.81	7.2	19.88	19.88	0.82	2.26	?	?	?	?	?	?	?	?	?	?	?	?	?	?	?	79.29	0.19	9	9	11	10	9	9	9.6	10
191	Majungasaurus	Majungasaurus lateral	Abelisauridae	Abelisauridae Lateral	FMNH PR2100	d05	crenatissimus	Smith et al., 2005	Maevarano Formation	Berivotra Village	Majunga Basin	Madagascar	Maastrichtian	Late Cretaceous	Adult or near adult	Left	d05	Lateral	13.3	8.56	25.37	29.45	0.64	1.91	?	?	?	?	?	?	?	?	?	?	?	?	?	?	?	80.57	0.09	11	11	11	12	9.5	11	11	11
192	Majungasaurus	Majungasaurus lateral	Abelisauridae	Abelisauridae Lateral	FMNH PR2100	d07	crenatissimus	Smith et al., 2005	Maevarano Formation	Berivotra Village	Majunga Basin	Madagascar	Maastrichtian	Late Cretaceous	Adult or near adult	Left	d07	Lateral	14.24	7.72	25.13	27.86	0.54	1.76	?	?	?	?	?	?	?	?	?	?	?	?	?	?	?	80.91	0.06	11	11	11	10	11	11	10.8	10.8
193	Majungasaurus	Majungasaurus lateral	Abelisauridae	Abelisauridae Lateral	FMNH PR2100	d12	crenatissimus	Smith et al., 2005	Maevarano Formation	Berivotra Village	Majunga Basin	Madagascar	Maastrichtian	Late Cretaceous	Adult or near adult	Left	d12	Lateral	12.66	7.12	19.93	23.79	0.56	1.57	?	?	?	?	?	?	?	?	?	?	?	?	?	?	?	78.31	0.04	12	12	16	13	10	12	13.2	11.3
194	Majungasaurus	Majungasaurus lateral	Abelisauridae	Abelisauridae Lateral	FMNH PR2100	d13	crenatissimus	Smith et al., 2005	Maevarano Formation	Berivotra Village	Majunga Basin	Madagascar	Maastrichtian	Late Cretaceous	Adult or near adult	Left	d13	Lateral	12.53	6.69	19.21	24.31	0.53	1.53	?	?	?	?	?	?	?	?	?	?	?	?	?	?	?	77.65	0.03	13	12	13	12	11	13	12.6	11.5
195	Majungasaurus	Majungasaurus lateral	Abelisauridae	Abelisauridae Lateral	FMNH PR2100	d14	crenatissimus	Smith et al., 2005	Maevarano Formation	Berivotra Village	Majunga Basin	Madagascar	Maastrichtian	Late Cretaceous	Adult or near adult	Left	d14	Lateral	12.28	6.7	17.87	23.41	0.55	1.46	?	?	?	?	?	?	?	?	?	?	?	?	?	?	?	76.77	0.02	13	12	14	13	11	13	13	12
196	Majungasaurus	Majungasaurus lateral	Abelisauridae	Abelisauridae Lateral	FMNH PR2100	d15	crenatissimus	Smith et al., 2005	Maevarano Formation	Berivotra Village	Majunga Basin	Madagascar	Maastrichtian	Late Cretaceous	Adult or near adult	Left	d15	Lateral	11.72	6.29	16.19	21.48	0.54	1.38	?	?	?	?	?	?	?	?	?	?	?	?	?	?	?	75.55	0.01	14	13	14	14	11	14	13.4	11.8
197	Majungasaurus	Majungasaurus lateral	Abelisauridae	Abelisauridae Lateral	FMNH PR2100	d17	crenatissimus	Smith et al., 2005	Maevarano Formation	Berivotra Village	Majunga Basin	Madagascar	Maastrichtian	Late Cretaceous	Adult or near adult	Left	d17	Lateral	9.33	5.36	14.48	17.93	0.57	1.55	?	?	?	?	?	?	?	?	?	?	?	?	?	?	?	73.6	0.06	14	15	16	14	11	14	15	12.3
198	Majungasaurus	Majungasaurus mesial	Abelisauridae	Abelisauridae Mesial	FMNH PR2100	d02	crenatissimus	Smith et al., 2005	Maevarano Formation	Berivotra Village	Majunga Basin	Madagascar	Maastrichtian	Late Cretaceous	Adult or near adult	Right	d02	Mesial	10.91	8.48	22.88	20.82	0.78	2.1	?	?	?	?	?	?	?	?	?	?	?	?	?	?	?	81.72	0.15	10	8	11	10	8.5	10	9.5	9.5
199	Majungasaurus	Majungasaurus mesial	Abelisauridae	Abelisauridae Mesial	FMNH PR2100	d03	crenatissimus	Smith et al., 2005	Maevarano Formation	Berivotra Village	Majunga Basin	Madagascar	Maastrichtian	Late Cretaceous	Adult or near adult	Right	d03	Mesial	13.53	8.27	22.87	25.98	0.61	1.69	?	?	?	?	?	?	?	?	?	?	?	?	?	?	?	79.93	0.05	10	9.5	10	11	9	10	9.8	10.4
200	Majungasaurus	Majungasaurus lateral	Abelisauridae	Abelisauridae Lateral	FMNH PR2100	d04	crenatissimus	Smith et al., 2005	Maevarano Formation	Berivotra Village	Majunga Basin	Madagascar	Maastrichtian	Late Cretaceous	Adult or near adult	Right	d04	Lateral	13.9	7.7	24.08	26.12	0.57	1.73	?	?	?	?	?	?	?	?	?	?	?	?	?	?	?	80.67	0.06	13	9.5	10	12	10	13	10.8	11
201	Majungasaurus	Majungasaurus lateral	Abelisauridae	Abelisauridae Lateral	FMNH PR2100	d06	crenatissimus	Smith et al., 2005	Maevarano Formation	Berivotra Village	Majunga Basin	Madagascar	Maastrichtian	Late Cretaceous	Adult or near adult	Right	d06	Lateral	13.5	7.77	25.75	27.54	0.58	1.91	?	?	?	?	?	?	?	?	?	?	?	?	?	?	?	81.26	0.09	11	9.5	13	11	11	11	11.2	11
202	Majungasaurus	Majungasaurus lateral	Abelisauridae	Abelisauridae Lateral	FMNH PR2100	d10	crenatissimus	Smith et al., 2005	Maevarano Formation	Berivotra Village	Majunga Basin	Madagascar	Maastrichtian	Late Cretaceous	Adult or near adult	Right	d10	Lateral	12.82	8.59	23.76	27.65	0.67	1.85	?	?	?	?	?	?	?	?	?	?	?	?	?	?	?	79.97	0.1	12	11	16	12	10	12	12.9	11.8
203	Majungasaurus	Majungasaurus lateral	Abelisauridae	Abelisauridae Lateral	FMNH PR2100	d11	crenatissimus	Smith et al., 2005	Maevarano Formation	Berivotra Village	Majunga Basin	Madagascar	Maastrichtian	Late Cretaceous	Adult or near adult	Right	d11	Lateral	13.17	7.05	23	26.02	0.54	1.75	?	?	?	?	?	?	?	?	?	?	?	?	?	?	?	79.94	0.06	12	11	14	11	9.5	12	12.3	11
204	Majungasaurus	Majungasaurus lateral	Abelisauridae	Abelisauridae Lateral	FMNH PR2100	d15	crenatissimus	Smith et al., 2005	Maevarano Formation	Berivotra Village	Majunga Basin	Madagascar	Maastrichtian	Late Cretaceous	Adult or near adult	Right	d15	Lateral	11.26	5.79	18.73	22.49	0.51	1.66	?	?	?	?	?	?	?	?	?	?	?	?	?	?	?	77.34	0.07	13	12	15	12	12	13	13.2	12.5
205	Majungasaurus	Majungasaurus lateral	Abelisauridae	Abelisauridae Lateral	FMNH PR2100	d16	crenatissimus	Smith et al., 2005	Maevarano Formation	Berivotra Village	Majunga Basin	Madagascar	Maastrichtian	Late Cretaceous	Adult or near adult	Right	d16	Lateral	12.88	5.25	18.71	23.06	0.41	1.45	?	?	?	?	?	?	?	?	?	?	?	?	?	?	?	77.62	0.02	13	12	15	13	12	13	13.4	13.3
206	Majungasaurus	Majungasaurus lateral	Abelisauridae	Abelisauridae Lateral	FMNH PR2278	mx02	crenatissimus	Smith et al., 2005	Maevarano Formation	Berivotra Village	Majunga Basin	Madagascar	Maastrichtian	Late Cretaceous	Adult or near adult	Right	mx02	Lateral	16.9	8.67	37.63	40.16	0.51	2.23	?	?	?	?	?	?	?	?	?	?	?	?	?	?	?	83.93	0.1	12	10	13	12	9.3	14	11.6	11.8
207	Majungasaurus	Majungasaurus lateral	Abelisauridae	Abelisauridae Lateral	FMNH PR2278	mx03	crenatissimus	Smith et al., 2005	Maevarano Formation	Berivotra Village	Majunga Basin	Madagascar	Maastrichtian	Late Cretaceous	Adult or near adult	Right	mx03	Lateral	17.1	8.81	35.01	41.03	0.52	2.05	?	?	?	?	?	?	?	?	?	?	?	?	?	?	?	83.01	0.07	12	12	14	12	10	13	12.5	11.5
208	Aucasaurus	Aucasaurus mesial	Abelisauridae	Abelisauridae Mesial	MCF-PVPH-236	Isolated	garridoi (large isolated)	Hendrickx et al., 2015	Anacleto Member of the Río Colorado Formation	Auca Mahuevo, near Mina La Escondida	Neuquén Province	Argentina	Maastrichtian	Late Cretaceous	Adult	/	Isolated, mesial/	Mesial	17.98	11.29	36.37	37.77	0.62792	2.0228	13.37	7.24	0.541511	0	37.77	100	3	extremely well visible	completely absent	absent	absent	?	?	?	?	?	?	14.5	13	15	12.5	15	?	14.16	13.75
209	Aucasaurus	Aucasaurus lateral	Abelisauridae	Abelisauridae Lateral	MCF-PVPH-236	mx last	garridoi	Hendrickx et al., 2015	Anacleto Member of the Río Colorado Formation	Auca Mahuevo, near Mina La Escondida	Neuquén Province	Argentina	Maastrichtian	Late Cretaceous	Adult	Right	last	Lateral	14.63	4.45	18.41	23.67	0.30417	1.25837	10.94	4.77	0.436015	0	23.67	100	4?	well visible	absent	absent	absent	?	?	?	?	?	?	17	13.5	15	16.66	12.5	?	15.16	14.72
210	Skorpiovenator	Skorpiovenator mesial	Abelisauridae	Abelisauridae Mesial	MMCH-PV 48	Most mesial - Isolated pmx?	bustingorryi	Hendrickx et al., 2015	Huincul Formation	Villa El Chocón	Neuquén Province	Argentina	Late Cenomanian–Early Turonian	'Middle Cretaceous'	Adult?	/	Most mesial - Isolated pmx?	Mesial	13.55	8.46	28.14	27.69	0.624354	2.07675	11.87	6.31	0.531592	0	27.69	100	3	very-well marked	absent	absent	absent	?	?	?	?	?	?	?	13.7	16.66	12.5	?	20	15.18	16.25
211	Skorpiovenator	Skorpiovenator lateral	Abelisauridae	Abelisauridae Lateral	MMCH-PV 48	Lateral - Isolated mx?	bustingorryi	Hendrickx et al., 2015	Huincul Formation	Villa El Chocón	Neuquén Province	Argentina	Late Cenomanian–Early Turonian	'Middle Cretaceous'	Adult?	/	Lateral - Isolated mx?	Lateral	18.76	6.68	41	43	0.356077	?	14.25	6.82	0.478596	0	43	100	3	very-well marked	absent	absent	absent	?	?	?	?	?	?	?	14	15.83	?	13	15	14.915	14
212	Carnotaurus	Carnotaurus mesial	Abelisauridae	Abelisauridae Mesial	MACN-CH 894	dt3	sastrei	Hendrickx et al., 2015	Gorro Frigio Formation	Pocho Sastre State, near Bajada Morneo	Chubut Province, Patagonia	Argentina	Albian/Cenomanian	'Middle Cretaceous'	Adult	Left	dt3	Mesial	13.93	9.94	30.13	30.57	0.713568	2.16296	?	?	?	?	?	?	?	?	?	absent	absent	?	?	?	?	?	?	?	?	?	?	?	?	?	?
213	Carnotaurus	Carnotaurus lateral	Abelisauridae	Abelisauridae Lateral	MACN-CH 894	dt6	sastrei	Hendrickx et al., 2015	Gorro Frigio Formation	Pocho Sastre State, near Bajada Morneo	Chubut Province, Patagonia	Argentina	Albian/Cenomanian	'Middle Cretaceous'	Adult	Left	dt6	Lateral	15.02	8.9	33.15	30.16	0.592543	2.20706	?	?	?	?	?	?	?	?	?	absent	absent	?	?	?	?	?	?	?	?	?	?	?	?	?	?
214	Carnotaurus	Carnotaurus lateral	Abelisauridae	Abelisauridae Lateral	MACN-CH 894	dt10	sastrei	Hendrickx et al., 2015	Gorro Frigio Formation	Pocho Sastre State, near Bajada Morneo	Chubut Province, Patagonia	Argentina	Albian/Cenomanian	'Middle Cretaceous'	Adult	Left	dt10	Lateral	13.53	8.78	27.03	29.25	0.648928	1.99778	?	?	?	?	?	?	?	?	?	absent	absent	?	?	?	?	?	?	?	?	?	?	?	?	?	?
215	Carnotaurus	Carnotaurus lateral	Abelisauridae	Abelisauridae Lateral	MACN-CH 894	dt11	sastrei	Hendrickx et al., 2015	Gorro Frigio Formation	Pocho Sastre State, near Bajada Morneo	Chubut Province, Patagonia	Argentina	Albian/Cenomanian	'Middle Cretaceous'	Adult	Left	dt11	Lateral	11.82	7.75	22.17	27.78	0.655668	1.87563	?	?	?	?	?	?	?	?	?	absent	absent	?	?	?	?	?	?	?	?	?	?	?	?	?	?
216	Abelisauridae	Abelisauridae lateral	Abelisauridae	Abelisauridae Lateral	MUCPv 641	Isolated	indet.	Hendrickx et al., 2015	Portezuilo Formation	Paleontological center of Lago Barreales	Neuquén Province	Argentina	Turonian/Coniacian	Late Cretaceous	?	/	Isolated	Lateral	10.95	4.6	19.25	22.56	0.420091	1.75799	8.99	4.18	0.464961	0	22.56	100	0	absent	short D	absent	absent	?	?	?	?	?	?	?	12	15.4	12.5	11.5	15	13.7	13
217	Abelisauridae	Abelisauridae lateral	Abelisauridae	Abelisauridae Lateral	MUCPv 482	Isolated	indet.	Hendrickx et al., 2015	Portezuilo Formation	Paleontological center of Lago Barreales	Neuquén Province	Argentina	Turonian/Coniacian	Late Cretaceous	?	/	Isolated	Lateral	10.5	4.18	19.55	18.8	0.398095	1.8619	9.08	3.97	0.437225	0	18.8	100	0	absent	short D	absent	absent	?	?	?	?	?	?	16.66	15	?	15	13.125	15	15.83	14.375
218	Abelisauridae	Abelisauridae mesial	Abelisauridae	Abelisauridae Mesial	MHNA.PV.2008.1.43	Isolated	indet.	Young et al., 2019 (C.H. pers. measurements)	Lower Argiles Rutilantes Formation	Jas Neuf Sud locality, Pourrières	Var Department	France	Late Campanian	Late Cretaceous	?	/	Isolated	Mesial	13.31	8.81	36.78	37.18	0.661908	2.76334	12.89	6.6	0.512025	0	37.18	100	0	absent	?	absent	absent	?	1.83	0.54	1.05	?	?	?	15	?	12.5	?	?	16.25	13.33
219	Abelisauridae	Abelisauridae lateral	Abelisauridae	Abelisauridae Lateral	MHNA.PV.2011.12.7	Isolated	indet.	Young et al., 2019 (C.H. pers. measurements)	Lower Argiles Rutilantes Formation	Jas Neuf Sud locality, Pourrières	Var Department	France	Late Campanian	Late Cretaceous	?	/	Isolated	Lateral	13.43	7.25	34.27	32.25	0.539836	2.55175	12.7	6.08	0.47874	0	32.25	100	0	absent	?	absent	absent	?	?	?	?	?	?	?	?	?	10	11.25	?	?	10.625
220	Abelisauridae	Abelisauridae lateral	Abelisauridae	Abelisauridae Lateral	NHM R4190 ("Massospondylus rawesi" of Lydekker, 1890)	Isolated	indet.	Young et al., 2019 (C.H. pers. measurements)	Lameta Formation (Lameta Beds)	Tákli	Nagpur area, Maharashtra, Central Province	India	Maastrichtian	Late Cretaceous	?	/	Isolated	Lateral	15.36	7.35	24.67	27.45	0.478516	1.60612	13	6.01	0.462308	0	27.45	100	?	too badly preserved to see	D, well developped labial	absent	absent	?	?	?	?	?	?	?	8.5	13.75	11.875	10	?	11.125	10.93
221	Abelisauridae	Abelisauridae lateral	Abelisauridae	Abelisauridae Lateral	MACN 18172 ("Megalosaurus inexpectatus" Del Corro, 1965)	Isolated	indet.	Young et al., 2019 (C.H. pers. measurements)	?	Cerca Corro Barcino	Chubut	Argentina	?	Late Cretaceous	?	/	Isolated	Lateral	12.13	5.68	27.04	28.88	0.468261	2.22918	8.79	3.95	0.449374	0	28.88	100	?	?	?	absent	absent	2.33	2.72	1.46	1.64	?	?	?	?	?	?	?	?	?	?
222	Abelisauridae	Abelisauridae lateral	Abelisauridae	Abelisauridae Lateral	UCPC 10	mx6	indet.	Hendrickx et al., 2015	Kem Kem Beds	Kem Kem	Meknès-Tafilalet	Morocco	Cenomanian	'Middle Cretaceous'	?	Right	mx6	Lateral	11.4	6.1	22	26	0.535088	1.92982	8.7	4.9	0.563218	0	26	100	0	absent	absent	absent	absent	?	?	?	?	?	?	12.5	12.5	12.5	10	13	?	12.5	11.5
223	Abelisauridae	Abelisauridae lateral	Abelisauridae	Abelisauridae Lateral	UCPC 10	mx6	indet.	Smith & Lamanna, 2006	Kem Kem Beds	Kem Kem	Meknès-Tafilalet	Morocco	Cenomanian	'Middle Cretaceous'	?	Right	maxilla	Lateral	13.43	6.53	23.8	25.78	0.486225	1.77215	?	?	?	?	?	?	?	?	?	?	?	?	?	?	?	80.6	0.076	13	12	?	?	?	11	12.5	11
224	Abelisauridae	Abelisauridae lateral	Abelisauridae	Abelisauridae Lateral	MGUP MEGA002	Isolated	indet.	Smith & Lamanna, 2006	Kem Kem Beds	Kem Kem	Meknès-Tafilalet	Morocco	Cenomanian	'Middle Cretaceous'	?	/	Isolated	Lateral	13.01	6.69	16.63	20.97	0.51422	1.27825	?	?	?	?	?	?	?	?	?	?	?	?	?	?	?	76.4	0.029	11	10	13	11.8	13	15.7	11.33	13.5
225	Abelisauridae	Abelisauridae lateral	Abelisauridae	Abelisauridae Lateral	MCPM 13693	Isolated	indet.	Smith & Vechia, 2006	Kem Kem Beds	Kem Kem	Meknès-Tafilalet	Morocco	Cenomanian	'Middle Cretaceous'	?	/	Isolated	Lateral	16.2	9.8	27.5	29.5	0.604938	1.69753	?	?	?	?	?	?	?	?	?	?	?	?	?	?	?	81.9	0.035	?	?	?	?	?	?	12.5	8.5
226	Abelisauridae	Abelisauridae lateral	Abelisauridae	Abelisauridae Lateral	MCNA-PV-3137; cast (Aerosteon holotype)	Isolated	indet.	Hendrickx et al., 2015	Anacleto Formation, Neuquén Group	Canãdon Amarillo, north of Cerro Colorado	Mendoza Province	Argentina	Santonian	Late Cretaceous	?	/	Isolated		16.5	8.4	33.3	34.8	0.509091	2.01818	13.4	6.4	0.477612	?	?	?	4	absent	absent	absent	absent	?	?	?	?	67	?	14	15	?	?	14	17	14.5	15.5
227	Monolophosaurus	Monolophosaurus mesial	Non-megalosaurian Megalosauroidea	Non-spinosaurid Megalosauroidea Mesial	IVPP 84019	pmx4	jiangi	This study	Shishugou Formation	Jiangjunmiao, Jiangjunmiao Depression	Xinjiang	China	Middle Bathonian–late Callovian	Middle Jurassic	Adult or subadult	Right	pmx4	Mesial	15.36	11.01	33.7	33.21	0.716797	2.19401	11.68	8.35	0.714897	18.04	15.17	45.679	2	visible on the labial side	?	absent	absent	?	?	?	?	?	?	?	?	/	13.33	17.5	?	?	15.415
228	Monolophosaurus	Monolophosaurus lateral	Non-megalosaurian Megalosauroidea	Non-spinosaurid Megalosauroidea Lateral	IVPP 84019	mx2	jiangi	This study	Shishugou Formation	Jiangjunmiao, Jiangjunmiao Depression	Xinjiang	China	Middle Bathonian–late Callovian	Middle Jurassic	Adult or subadult	Right	mx2	Lateral	19.36	9.89	41.51	46.8	0.510847	2.14411	14.06	8.07	0.573969	31	15.8	33.7607	3	marginal undualtion close to DC on labial side	?	absent	absent	?	?	?	?	?	?	16.25	15	/	14	16	?	15.625	15
229	Monolophosaurus	Monolophosaurus lateral	Non-megalosaurian Megalosauroidea	Non-spinosaurid Megalosauroidea Lateral	IVPP 84019	mx9	jiangi	This study	Shishugou Formation	Jiangjunmiao, Jiangjunmiao Depression	Xinjiang	China	Middle Bathonian–late Callovian	Middle Jurassic	Adult or subadult	Right	mx9	Lateral	15.95	5.76	17.71	28.85	0.361129	1.11034	?	?	?	?	?	?	?	?	?	absent	absent	?	?	?	?	?	?	17	15	?	14.375	15	?	16	14.6875
230	Monolophosaurus	Monolophosaurus lateral	Non-megalosaurian Megalosauroidea	Non-spinosaurid Megalosauroidea Lateral	IVPP 84019	dt7	jiangi	This study	Shishugou Formation	Jiangjunmiao, Jiangjunmiao Depression	Xinjiang	China	Middle Bathonian–late Callovian	Middle Jurassic	Adult or subadult	Right	dt7	Lateral	13.66	6.17	25.05	28.44	0.451684	2.08199	?	?	?	?	?	?	?	?	?	absent	absent	?	?	?	?	?	?	17	17.5	?	15.83	17.5	?	17.25	16.665
231	Monolophosaurus	Monolophosaurus lateral	Non-megalosaurian Megalosauroidea	Non-spinosaurid Megalosauroidea Lateral	IVPP 84019	dt8	jiangi	This study	Shishugou Formation	Jiangjunmiao, Jiangjunmiao Depression	Xinjiang	China	Middle Bathonian–late Callovian	Middle Jurassic	Adult or subadult	Right	dt8	Lateral	13.07	7.13	20.83	25	0.545524	1.59373	?	?	?	?	?	?	?	?	?	absent	absent	?	?	?	?	?	?	?	?	?	?	18	?	?	18
232	Monolophosaurus	Monolophosaurus lateral	Non-megalosaurian Megalosauroidea	Non-spinosaurid Megalosauroidea Lateral	IVPP 84019	dt11	jiangi	This study	Shishugou Formation	Jiangjunmiao, Jiangjunmiao Depression	Xinjiang	China	Middle Bathonian–late Callovian	Middle Jurassic	Adult or subadult	Right	dt11	Lateral	13.47	6.77	20.29	21.56	0.502598	1.50631	?	?	?	?	?	?	?	?	?	absent	absent	?	?	?	?	?	?	?	?	?	?	?	?	?	?
233	Monolophosaurus	Monolophosaurus lateral	Non-megalosaurian Megalosauroidea	Non-spinosaurid Megalosauroidea Lateral	IVPP 84019	dt12	jiangi	This study	Shishugou Formation	Jiangjunmiao, Jiangjunmiao Depression	Xinjiang	China	Middle Bathonian–late Callovian	Middle Jurassic	Adult or subadult	Right	dt12	Lateral	11.24	4.39	12.8	20.33	0.390569	1.13879	?	?	?	?	?	?	?	?	?	absent	absent	?	?	?	?	?	?	?	?	?	?	?	?	?	?
234	Monolophosaurus	Monolophosaurus lateral	Non-megalosaurian Megalosauroidea	Non-spinosaurid Megalosauroidea Lateral	IVPP 84019	dt14	jiangi	This study	Shishugou Formation	Jiangjunmiao, Jiangjunmiao Depression	Xinjiang	China	Middle Bathonian–late Callovian	Middle Jurassic	Adult or subadult	Right	dt14	Lateral	11.62	7.73	18.32	22.51	0.665232	1.57659	?	?	?	?	?	?	?	?	?	absent	absent	?	?	?	?	?	?	?	?	?	?	?	?	?	?
235	Monolophosaurus	Monolophosaurus mesial	Non-megalosaurian Megalosauroidea	Non-spinosaurid Megalosauroidea Mesial	IVPP 84019	dt1	jiangi	This study	Shishugou Formation	Jiangjunmiao, Jiangjunmiao Depression	Xinjiang	China	Middle Bathonian–late Callovian	Middle Jurassic	Adult or subadult	Left	dt1	Mesial	10.72	6.66	20.71	?	0.621269	1.93	9.25	5.92	0.64	?	?	?	0	absent	absent	absent	absent	?	?	?	?	?	?	?	?	/	?	17.5	20	?	18.75
236	Monolophosaurus	Monolophosaurus lateral	Non-megalosaurian Megalosauroidea	Non-spinosaurid Megalosauroidea Lateral	IVPP 84019	dt6	jiangi	This study	Shishugou Formation	Jiangjunmiao, Jiangjunmiao Depression	Xinjiang	China	Middle Bathonian–late Callovian	Middle Jurassic	Adult or subadult	Left	dt6	Lateral	12.01	6.58	21.58	23.87	0.547877	1.79684	8.94	4.88	0.545861	8.66	15.21	63.7202	0	absent	absent	absent	absent	?	?	?	?	?	?	?	20	/	?	17.5	?	20	17.5
237	Monolophosaurus	Monolophosaurus lateral	Non-megalosaurian Megalosauroidea	Non-spinosaurid Megalosauroidea Lateral	IVPP 84019	dt8	jiangi	This study	Shishugou Formation	Jiangjunmiao, Jiangjunmiao Depression	Xinjiang	China	Middle Bathonian–late Callovian	Middle Jurassic	Adult or subadult	Left	dt8	Lateral	12.31	5.66	19.85	22.41	0.459789	1.61251	8.82	4.82	0.546485	8.03	14.38	64.1678	1?	very tenuous	absent	absent	absent	?	?	?	?	?	?	?	?	/	?	16	20.5	?	18.25
238	Monolophosaurus	Monolophosaurus lateral	Non-megalosaurian Megalosauroidea	Non-spinosaurid Megalosauroidea Lateral	IVPP 84019	dt12	jiangi	This study	Shishugou Formation	Jiangjunmiao, Jiangjunmiao Depression	Xinjiang	China	Middle Bathonian–late Callovian	Middle Jurassic	Adult or subadult	Left	dt12	Lateral	12.93	4.94	21.1	21.4	0.382057	1.63186	10.14	4.91	0.484221	13.84	7.56	35.3271	1	very tenuous	absent	absent	absent	?	?	?	?	?	?	21.5	20	/	16.875	20	23.75	20.75	20.21
239	Monolophosaurus	Monolophosaurus lateral	Non-megalosaurian Megalosauroidea	Non-spinosaurid Megalosauroidea Lateral	IVPP 84019	dt16	jiangi	This study	Shishugou Formation	Jiangjunmiao, Jiangjunmiao Depression	Xinjiang	China	Middle Bathonian–late Callovian	Middle Jurassic	Adult or subadult	Left	dt16	Lateral	9.86	5.45	16.88	18.61	0.552738	1.71197	8.41	4.64	0.551724	?	?	?	0	absent	absent	absent	absent	?	?	?	?	?	?	?	?	?	?	19.16	26.25	?	22.705
240	Condorraptor	Condorraptor lateral	Non-megalosaurian Megalosauroidea	Non-spinosaurid Megalosauroidea Lateral	MPEF-PV 1695	Isolated	currumili	Rauhut, 2005	Cañadón Asfalto Formation	Cerro Cóndor	Chubut	Argentina	Callovian	Middle Jurassic	Juvenile or subadult	/	Isolated	Lateral	10.5	6.5	26	?	0.619048	2.47619	?	?	?	?	?	?	?	?	absent	absent	absent	?	?	?	?	?	?	17.5 (MCA)	15	/	14.85 (DCA)	16.5	?	16.25	15.64
241	Piatnitzkysaurus	Piatnitzkysaurus lateral	Non-megalosaurian Megalosauroidea	Non-spinosaurid Megalosauroidea Lateral	PVL 4073	Isolated with long root	floresi	Hendrickx et al., 2015	Cañadón Asfalto Formation	Cerro Cóndor	Chubut	Argentina	Callovian	Middle Jurassic	At least subadult	/	Isolated	Lateral	10.86	6.75	27.41	25.28	0.621547	2.52394	9.95	5.12	0.514573	0	25.28	100	2-3	marginal distal carina	very well developped DC lingual and labial	absent	absent	?	?	?	?	?	?	?	17.5	17.5	15	14.16	20	17.5	16.38
242	Piatnitzkysaurus	Piatnitzkysaurus lateral	Non-megalosaurian Megalosauroidea	Non-spinosaurid Megalosauroidea Lateral	PVL 4073	Isolated no root	floresi	Hendrickx et al., 2015	Cañadón Asfalto Formation	Cerro Cóndor	Chubut	Argentina	Callovian	Middle Jurassic	At least subadult	/	Isolated	Lateral	8.98	5.24	18.82	19.52	0.583519	2.09577	8.19	4.15	0.506716	6.54	12.98	66.4959	4	poorly visible on the lingual side	D, medium both lingual and labial	absent	absent	?	?	?	?	?	?	?	?	/	18.33	16.66	25	?	20
243	Piatnitzkysaurus	Piatnitzkysaurus lateral	Non-megalosaurian Megalosauroidea	Non-spinosaurid Megalosauroidea Lateral	MACN-CH 895 (largest crown, complete)	Isolated	floresi	Young et al., 2019 (C.H. pers. measurements)	Cañadón Asfalto Formation	Cerro Cóndor	Chubut	Argentina	Callovian	Middle Jurassic	?	/	Isolated	Lateral	23.26	14.15	52.27	56.76	0.60834	2.24721	19.48	11.37	0.583676	33.35	23.41	41.2438	3	visible adjacent to the distal carina	DB DC, very short	absent	absent	?	?	?	?	?	?	13,33 (MCA)	15	/	10 (DCA)	12	16	14.165	12.66
244	Piatnitzkysaurus	Piatnitzkysaurus lateral	Non-megalosaurian Megalosauroidea	Non-spinosaurid Megalosauroidea Lateral	MACN-CH 895 (small crown, complete)	Isolated	floresi	Young et al., 2019 (C.H. pers. measurements)	Cañadón Asfalto Formation	Cerro Cóndor	Chubut	Argentina	Callovian	Middle Jurassic	?	/	Isolated	Lateral	17.26	8.98	35.32	39.62	0.520278	2.04635	13.75	8.07	0.586909	15.88	23.74	59.9192	4	very well visible on both sides	DB short, otherwise absent	absent	absent	2.9	4.92	4.12	3.39	?	?	15 (MCA)	15	/	11.25	12	15	15	12.75
245	Marshosaurus	Marshosaurus lateral	Non-megalosaurian Megalosauroidea	Non-spinosaurid Megalosauroidea Lateral	UMNH VP 6368	dt4	bicentesimus	Young et al., 2019 (C.H. pers. measurements)	Brushy Basin Member, Morrisson Formation	Emery County	Utah	USA	Kimmeridgian	Late Jurassic	?	Right	dt4	Lateral	10.32	5.76	20.91	23.82	0.55814	2.02616	7.49	4.32	0.576769	8.87	14.95	62.7624	0	absent	DC short on labial	absent	absent	?	?	?	?	?	?	?	20	/	16.66	15	20	20	17.22
246	Marshosaurus	Marshosaurus lateral	Non-megalosaurian Megalosauroidea	Non-spinosaurid Megalosauroidea Lateral	UMNH VP 6368	dt7	bicentesimus	Young et al., 2019 (C.H. pers. measurements)	Brushy Basin Member, Morrisson Formation	Emery County	Utah	USA	Kimmeridgian	Late Jurassic	?	Right	dt7	Lateral	8.31	4.95	13.16	16.45	0.595668	1.58363	6.73	3.54	0.526003	11.76	4.69	28.5106	3	very tenuous on labial side	?	absent	absent	?	?	?	?	?	?	17.5	?	/	?	17.5	?	17.5	17.5
247	Marshosaurus	Marshosaurus lateral	Non-megalosaurian Megalosauroidea	Non-spinosaurid Megalosauroidea Lateral	DMNH 3718	mx2	bicentesimus	Young et al., 2019 (C.H. pers. measurements)	Morrisson Formation	Moffat	Colorado	USA	Kimmeridgian-Tithonian	Late Jurassic	?	Right	mx2	Lateral	15.55	5.5	31.31	29.48	0.353698	2.0135	12.02	5.86	0.487521	?	?	?	2/3mm	very tenuous on labial	absent	absent	absent	?	?	?	?	?	?	?	20	?	?	15	?	20	15
248	Marshosaurus	Marshosaurus lateral	Non-megalosaurian Megalosauroidea	Non-spinosaurid Megalosauroidea Lateral	DMNH 3718	mx4	bicentesimus	Young et al., 2019 (C.H. pers. measurements)	Morrisson Formation	Moffat	Colorado	USA	Kimmeridgian-Tithonian	Late Jurassic	?	Right	mx4	Lateral	16.55	5.43	40.9	42.3	0.328097	2.4713	15.07	6.25	0.414731	?	?	?	2/3 or 4mm	visible with light on labial side	?	absent	absent	?	?	?	?	?	?	?	?	?	15.5	15	?	?	15.25
249	Marshosaurus	Marshosaurus lateral	Non-megalosaurian Megalosauroidea	Non-spinosaurid Megalosauroidea Lateral	DMNH 3718	mx7	bicentesimus	Young et al., 2019 (C.H. pers. measurements)	Morrisson Formation	Moffat	Colorado	USA	Kimmeridgian-Tithonian	Late Jurassic	?	Right	mx7	Lateral	15.58	4.44	23.92	29.25	0.284981	1.5353	11.85	5.22	0.440506	?	?	?	2/3mm	tenuous on labial and lingual	?	absent	absent	?	?	?	?	?	?	?	?	?	?	16.66	?	?	16.66
250	Marshosaurus	Marshosaurus lateral	Non-megalosaurian Megalosauroidea	Non-spinosaurid Megalosauroidea Lateral	DMNH 3718	mx9	bicentesimus	Young et al., 2019 (C.H. pers. measurements)	Morrisson Formation	Moffat	Colorado	USA	Kimmeridgian-Tithonian	Late Jurassic	?	Right	mx9	Lateral	12.51	4.69	19.51	25.75	0.3749	1.55955	10.17	4.31	0.423795	?	?	?	2/3mm	visible with light on labial	?	absent	absent	?	?	?	?	?	?	?	18.75	?	?	16.25	19.16	18.75	17.705
251	Marshosaurus	Marshosaurus lateral	Non-megalosaurian Megalosauroidea	Non-spinosaurid Megalosauroidea Lateral	DMNH 3718	mx10	bicentesimus	Young et al., 2019 (C.H. pers. measurements)	Morrisson Formation	Moffat	Colorado	USA	Kimmeridgian-Tithonian	Late Jurassic	?	Right	mx10	Lateral	11.8	3.67	18	20.66	0.311017	1.52542	10.09	4.58	0.453915	?	?	?	2/2mm	visible with light on labial	?	absent	absent	?	?	?	?	?	?	?	21	?	?	17.5	20	21	18.75
252	Marshosaurus	Marshosaurus lateral	Non-megalosaurian Megalosauroidea	Non-spinosaurid Megalosauroidea Lateral	DMNH 3718	mx13	bicentesimus	Young et al., 2019 (C.H. pers. measurements)	Morrisson Formation	Moffat	Colorado	USA	Kimmeridgian-Tithonian	Late Jurassic	?	Right	mx13	Lateral	7.3	3.14	7.77	9.73	0.430137	1.06438	5.53	3.12	0.564195	4.05	5.68	58.3762	2/1mm	very tenuous on labial	?	absent	absent	?	?	?	?	?	?	?	37.5	?	20	20	?	37.5	20
253	Afrovenator	Afrovenator lateral	Megalosauridae	Non-spinosaurid Megalosauroidea Lateral	UC UBA 1	Isolated	abakensis	Hendrickx et al., 2015	Tiourarén Formation	Tedreft & Fako	Département d'Agadez	Niger	Bathonian - Oxfordian	Middle Jurassic	Adult?	/	Isolated	Lateral	27.6	11.7	61.1	64.6	0.423913	2.21377	21.8	11.6	0.53211	12.1	52.5	81.2693	3	well visible	D, short	absent	absent	5	4.1	3.2	3.5	?	?	7.5	8	?	8	10	15	7.75	11
254	Duriavenator	Duriavenator lateral	Megalosauridae	Non-spinosaurid Megalosauroidea Lateral	BMNH R332	mx03	hesperis	Hendrickx et al., 2015	Upper Inferior Oolite	Greenhill, Sherborne,	Dorset	U.K.	Late Bajocian	Middle Jurassic	No indication of maturity	Right	mx03	Lateral	24.31	12.74	51.73	57.2	0.524064	2.12793	19.07	10.07	0.528055	23.55	33.65	58.8287	absent	absent	D and M short, almost not visible	absent	absent	?	?	?	?	?	?	?	12	/	9	11	14	12	11.33
255	Duriavenator	Duriavenator lateral	Megalosauridae	Non-spinosaurid Megalosauroidea Lateral	BMNH R332	mx06	hesperis	Hendrickx et al., 2015	Upper Inferior Oolite	Greenhill, Sherborne,	Dorset	U.K.	Late Bajocian	Middle Jurassic	No indication of maturity	Right	mx06	Lateral	20.97	8.01	39.42	49.15	0.381974	1.87983	18.2	8.48	0.465934	10.77	38.38	78.0875	absent	absent	D, short	absent	absent	?	?	?	?	?	?	10	13	/	10	12.5	15	11.5	12.5
256	Duriavenator	Duriavenator lateral	Megalosauridae	Non-spinosaurid Megalosauroidea Lateral	BMNH R332	dt8	hesperis	Young et al., 2019 (C.H. pers. measurements)	Upper Inferior Oolite	Greenhill, Sherborne,	Dorset	U.K.	Late Bajocian	Middle Jurassic	No indication of maturity	Right	dt8	Lateral	18.43	9.2	29.97	30.27	0.499186	1.62615	14.43	7.46	0.516979	12.77	17.5	57.813	2/5	visible on basal part of labial, very tenous on crown base of lingual	DC very short on labial, medium on lingual side	absent	absent	?	?	?	?	?	?	11.25	9.16	/	10.25	12	?	10.2	11.125
257	Duriavenator	Duriavenator lateral	Megalosauridae	Non-spinosaurid Megalosauroidea Lateral	BMNH R332	dt10	hesperis	Young et al., 2019 (C.H. pers. measurements)	Upper Inferior Oolite	Greenhill, Sherborne,	Dorset	U.K.	Late Bajocian	Middle Jurassic	No indication of maturity	Right	dt10	Lateral	17.2	8.02	28.53	27.46	0.466279	1.65872	13.6	6.98	0.513235	9.03	18.43	67.1158	2/3	very tenuous on labial	absent	absent	absent	?	?	?	?	?	?	12	10	/	11.5	10.5	16.25	11	12.75
258	Duriavenator	Duriavenator lateral	Megalosauridae	Non-spinosaurid Megalosauroidea Lateral	BMNH R332	mx03	hesperis	Smith et al., 2005	Upper Inferior Oolite	Greenhill, Sherborne,	Dorset	U.K.	Late Bajocian	Middle Jurassic	No indication of maturity	Right	mx03	Lateral	24.3	12.8	51.09	57.85	0.526749	2.10247	?	?	?	?	?	?	?	?	?	?	?	?	?	?	?	85.32	0.028	10	8.5	13	11	11	14	10.5	12
259	Duriavenator	Duriavenator lateral	Megalosauridae	Non-spinosaurid Megalosauroidea Lateral	BMNH R332	mx06	hesperis	Smith et al., 2005	Upper Inferior Oolite	Greenhill, Sherborne,	Dorset	U.K.	Late Bajocian	Middle Jurassic	No indication of maturity	Right	mx06	Lateral	20.9	11.8	38.92	45.56	0.564593	1.8622	?	?	?	?	?	?	?	?	?	?	?	?	?	?	?	83.87	0.034	12	10.5	13	10	11	15	11.8333	12
260	Duriavenator	Duriavenator lateral	Megalosauridae	Non-spinosaurid Megalosauroidea Lateral	BMNH R332	Isolated	hesperis	Smith et al., 2005	Upper Inferior Oolite	Greenhill, Sherborne,	Dorset	U.K.	Late Bajocian	Middle Jurassic	No indication of maturity	/	Isolated	Lateral	18.2	8.32	29.29	34.06	0.457143	1.60934	?	?	?	?	?	?	?	?	?	?	?	?	?	?	?	83.87	0.056	12	9	12	12	12	16	11	13.2
261	Megalosaurus	Megalosaurus lateral	Megalosauridae	Non-spinosaurid Megalosauroidea Lateral	BMNH R39476 (Purchid 1865)	Isolated	bucklandi	Hendrickx et al., 2015	Forest Marble	Stanton	Witshire	U.K.	Bathonian	Middle Jurassic	?	/	Isolated	Lateral	18.31	10.11	35.45	38.83	0.552157	1.9361	15.8	8	0.506329	15.39	23.44	60.3657	2 large/5	well visible, numerous	D, short	absent	absent	4.96	6.48	4.78	4.11	?	?	?	?	/	13.33	14.5	15	?	14.27
262	Megalosaurus	Megalosaurus lateral	Megalosauridae	Non-spinosaurid Megalosauroidea Lateral	BMNH R47152 (Purchid 1876)	Isolated	bucklandi	Hendrickx et al., 2015	Chipping Norton Limestone, Inferior Oolite	Daston	Northamptonshire	U.K.	Bathonian	Middle Jurassic	?	/	Isolated	Lateral	11.25	6.37	22.5	24.25	0.566222	2	9.1	5.4	0.593407	?	?	?	3-4/5'	well visible, numerous	absent	absent	absent	?	?	?	?	?	?	18.75	20.625	/	18	20	20	19.68	19.33
263	Megalosaurus	Megalosaurus lateral	Megalosauridae	Non-spinosaurid Megalosauroidea Lateral	BMNH R234 (one large tooth, Purchid 1882)	Isolated	bucklandi	Hendrickx et al., 2015	Stonefield Slate Beds, Tayton Limestone	Stonefield	Oxfordshire	U.K.	Bathonian	Middle Jurassic	?	/	Isolated	Lateral	24.28	13.14	52.33	54.19	0.541186	2.15527	18.07	10.3	0.570006	28.68	25.51	47.0751	3 large	well visible, adjacent to the mesial carina	D, long; M, short	absent	absent	1.5	4.78	2.16	2.26	?	?	10.65	9.5	/	10	12	15	10.075	12.33
264	Megalosaurus	Megalosaurus lateral	Megalosauridae	Non-spinosaurid Megalosauroidea Lateral	BMNH R31834 (Purchid 1854)	Isolated	bucklandi	Hendrickx et al., 2015	Stonefield Slate Beds, Tayton Limestone	Stonefield	Oxfordshire	U.K.	Bathonian	Middle Jurassic	?	/	Isolated	Lateral	17.7	6.84	28.64	33.38	0.386441	1.61808	13.14	6.66	0.506849	14.24	19.14	57.3397	3-4/5'	well visible, numerous	D, moderate	absent	absent	1.77	3.38	3.2	2.14	?	?	12.5	12	/	12.5	14	16	12.25	14.16
265	Megalosaurus	Megalosaurus lateral	Megalosauridae	Non-spinosaurid Megalosauroidea Lateral	BMNH R47963 (Purchid 1877)	Isolated	bucklandi	Hendrickx et al., 2015	Stonefield Slate Beds, Tayton Limestone	Stonefield	Oxfordshire	U.K.	Bathonian	Middle Jurassic	?	/	Isolated	Lateral	23.92	12.06	51.74	48.85	0.504181	2.16304	18.53	9.72	0.524555	23.77	25.08	51.3408	3 large	well visible, numerous	D, long; M, short	absent	absent	?	?	?	?	?	?	10.83	11	/	12	13	17	10.915	14
266	Megalosaurus	Megalosaurus lateral	Megalosauridae	Non-spinosaurid Megalosauroidea Lateral	BMNH R28608 (Purchid 1853)	Isolated	bucklandi	Hendrickx et al., 2015	Stonefield Slate Beds, Tayton Limestone	Eyeford	Gloucesters	U.K.	Bathonian	Middle Jurassic	?	/	Isolated	Lateral	21.38	13.66	47.37	44.93	0.638915	2.21562	17.25	11.65	0.675362	12.78	32.15	71.5558	?	very tenuous	D, short	absent	absent	4.86	5.2	4.68	4.96	?	?	6,5 (MCA)	8.5	/	7	8.75	10	7.5	8.58
267	Megalosaurus	Megalosaurus lateral	Megalosauridae	Non-spinosaurid Megalosauroidea Lateral	BMNH R2635 big (Purchid 1895)	Isolated	bucklandi	Hendrickx et al., 2015	Stonefield Slate Beds, Tayton Limestone	Eyeford	Gloucesters	U.K.	Bathonian	Middle Jurassic	?	/	Isolated	Lateral	26.45	13.93	54.42	59.29	0.526654	2.05747	20.64	11.12	0.53876	35.34	23.95	40.3947	3/5mm	visible, little tennous	D, short	absent	absent	2.08	5.3	5.12	4.04	?	?	11,25 (MCA)	11.25	/	10	11	12	11.25	11
268	Megalosaurus	Megalosaurus mesial	Megalosauridae	Non-spinosaurid Megalosauroidea Mesial	BMNH R2635 small (Purchid 1985)	Isolated	bucklandi	Hendrickx et al., 2015	Stonefield Slate Beds, Tayton Limestone	Eyeford	Gloucesters	U.K.	Bathonian	Middle Jurassic	?	/	Isolated	Mesial	11.36	7.72	26.63	29.75	0.679577	2.34419	8.63	5.63	0.652375	?	?	?	?	absent	absent	absent	absent	4.26	3.59	2.87	3.3	?	?	?	?	/	10	13	16	?	13
269	Megalosaurus	Megalosaurus lateral	Megalosauridae	Non-spinosaurid Megalosauroidea Lateral	OUMNH J13505	dt06	bucklandi (holotype)	Hendrickx et al., 2015	Taynton Limestone Formation	Stonefield	Oxfordshire	U.K.	Bathonian	Middle Jurassic	Adult?	Right	dt06	Lateral	24.12	12.8	46.54	55.81	0.53068	1.92952	19.28	10.2	0.529046	21.61	34.2	61.2793	2	large bands well visible	DC lingual, medium	absent	absent	?	?	?	?	?	?	?	?	/	9	10	15	?	11.33
270	Megalosaurus	Megalosaurus lateral	Megalosauridae	Non-spinosaurid Megalosauroidea Lateral	OUMNH J13506	mx01	bucklandi	Hendrickx et al., 2015	Taynton Limestone Formation	Stonefield	Oxfordshire	U.K.	Bathonian	Middle Jurassic	Adult?	Left	mx01	Lateral	24.82	14.85	62.72	68.02	0.598308	2.52699	?	?	?	36.68	31.34	46.0747	?	?	?	absent	absent	?	?	?	?	?	?	8.75	?	/	?	?	15	8.75	15
271	Dubreuillosaurus	Dubreuillosaurus mesial	Megalosauridae	Non-spinosaurid Megalosauroidea Mesial	MNHN 1998-13	pmx1	valesdunensis	Hendrickx et al., 2015	‘Calcaire de Caen’ Formation	Conteville	Département du Calvados	France	Bathonian	Middle Jurassic	Immature	Left	pmx1	Mesial	8.3	6	18	17	0.722892	2.16867	6	4.5	0.75	7.5	9.5	55.8824	0	absent	absent	absent	absent	?	?	?	?	?	?	12	/	/	12	11.5	17	12	13.5
272	Dubreuillosaurus	Dubreuillosaurus mesial	Megalosauridae	Non-spinosaurid Megalosauroidea Mesial	MNHN 1998-13	pmx2	valesdunensis	Hendrickx et al., 2015	‘Calcaire de Caen’ Formation	Conteville	Département du Calvados	France	Bathonian	Middle Jurassic	Immature	Left	pmx2	Mesial	10.5	7.7	22	23.6	0.733333	2.09524	7.7	5.2	0.675325	8.87	14.73	62.4153	?	very tenuous	absent	absent	absent	?	?	?	?	?	?	13	12.5	/	12	12.5	16	12.75	13.5
273	Dubreuillosaurus	Dubreuillosaurus lateral	Megalosauridae	Non-spinosaurid Megalosauroidea Lateral	MNHN 1998-13	mx4	valesdunensis	Hendrickx et al., 2015	‘Calcaire de Caen’ Formation	Conteville	Département du Calvados	France	Bathonian	Middle Jurassic	Immature	Right, cast	mx4	Lateral	17.52	6.34	27.67	32.11	0.361872	1.57934	11.29	4.92	0.435784	?	?	?	?	?	?	absent	absent	?	?	?	?	?	?	?	?	?	?	?	?	?	?
274	Dubreuillosaurus	Dubreuillosaurus lateral	Megalosauridae	Non-spinosaurid Megalosauroidea Lateral	MNHN 1998-13	mx5	valesdunensis	Hendrickx et al., 2015	‘Calcaire de Caen’ Formation	Conteville	Département du Calvados	France	Bathonian	Middle Jurassic	Immature	Right, cast	mx5	Lateral	17.6	7.06	39.07	37.75	0.401136	2.21989	13.96	5.46	0.391117	?	?	?	?	?	?	absent	absent	?	?	?	?	?	?	?	?	?	?	?	?	?	?
275	Dubreuillosaurus	Dubreuillosaurus lateral	Megalosauridae	Non-spinosaurid Megalosauroidea Lateral	MNHN 1998-13	mx6	valesdunensis	Hendrickx et al., 2015	‘Calcaire de Caen’ Formation	Conteville	Département du Calvados	France	Bathonian	Middle Jurassic	Immature	Right, cast	mx6	Lateral	14.77	6.02	21.29	28.4	0.407583	1.44144	10.58	5.01	0.473535	?	?	?	?	?	?	absent	absent	?	?	?	?	?	?	?	?	?	?	?	?	?	?
276	Dubreuillosaurus	Dubreuillosaurus lateral	Megalosauridae	Non-spinosaurid Megalosauroidea Lateral	MNHN 1998-13	mx7	valesdunensis	Hendrickx et al., 2015	‘Calcaire de Caen’ Formation	Conteville	Département du Calvados	France	Bathonian	Middle Jurassic	Immature	Right, cast	mx7	Lateral	15.71	6.45	27.72	36.02	0.410567	1.76448	12.21	5.57	0.456183	?	?	?	?	?	?	absent	absent	?	?	?	?	?	?	?	?	?	?	?	?	?	?
277	Dubreuillosaurus	Dubreuillosaurus lateral	Megalosauridae	Non-spinosaurid Megalosauroidea Lateral	MNHN 1998-13	mx9	valesdunensis	Hendrickx et al., 2015	‘Calcaire de Caen’ Formation	Conteville	Département du Calvados	France	Bathonian	Middle Jurassic	Immature	Right, cast	mx9	Lateral	10.39	5.68	16.83	22.24	0.546679	1.61983	10.08	4.55	0.451389	?	?	?	?	?	?	absent	absent	?	?	?	?	?	?	?	?	?	?	?	?	?	?
278	Dubreuillosaurus	Dubreuillosaurus lateral	Megalosauridae	Non-spinosaurid Megalosauroidea Lateral	MNHN 1998-13	dt6	valesdunensis	Hendrickx et al., 2015	‘Calcaire de Caen’ Formation	Conteville	Département du Calvados	France	Bathonian	Middle Jurassic	Immature	Left	dt6	Lateral	10.7	5.4	18	17.6	0.504673	1.68224	6.8	3.8	0.558824	6	11.6	65.9091	0	absent	D short	absent	absent	?	?	?	?	?	?	17.5	?	/	13.5	16	17	17.5	15.5
279	Dubreuillosaurus	Dubreuillosaurus lateral	Megalosauridae	Non-spinosaurid Megalosauroidea Lateral	MNHN 1998-13	dt8	valesdunensis	Hendrickx et al., 2015	‘Calcaire de Caen’ Formation	Conteville	Département du Calvados	France	Bathonian	Middle Jurassic	Immature	Left	dt8	Lateral	10.5	5.2	16	15.9	0.495238	1.52381	6.4	3.4	0.53125	?	?	?	0	absent	D short to medium	absent	absent	?	?	?	?	?	?	16.6	?	/	14	16	20	16.6	16.6667
280	Dubreuillosaurus	Dubreuillosaurus lateral	Megalosauridae	Non-spinosaurid Megalosauroidea Lateral	MNHN 1998-13	Isolated	valesdunensis	Hendrickx et al., 2015	‘Calcaire de Caen’ Formation	Conteville	Département du Calvados	France	Bathonian	Middle Jurassic	Immature	/	Isolated	Lateral	9.9	4.3	14.1	12.8	0.434343	1.42424	6.3	3.2	0.507937	4	8.8	68.75	0	absent	D short to medium; barely visible	absent	absent	?	?	?	?	?	?	17	16	/	14	16	19	16.5	16.3333
281	Torvosaurus	Torvosaurus lateral	Megalosauridae	Non-spinosaurid Megalosauroidea Lateral	BYUVP 725 12817	Isolated	tanneri	Young et al., 2019 (C.H. pers. measurements)	Morrisson Formation	Dry Mesa Quarry, Dry Mesa	Colorado	U.S.	Kimmeridgian-Tithonian	Late Jurassic	Adult	/	Isolated	Lateral	42.43	21.09	105.28	105.12	0.497054	2.48126	28.13	15.67	0.557057	0	105.12	100	2	well visible close to D carina	D medium to long, M labial long	absent	absent	?	?	?	?	?	?	8	6	?	6	7	12	7	8.33333
282	Torvosaurus	Torvosaurus lateral	Megalosauridae	Non-spinosaurid Megalosauroidea Lateral	BMNH R36728 (cast; Presid. Martin Munt 18/10/2013)	Isolated	cf. tanneri	Young et al., 2019 (C.H. pers. measurements)	Morrisson Formation	Moffat County	Utah	U.S.	Kimmeridgian-Tithonian	Late Jurassic	Adult	/	Isolated	Lateral	40.44	21.54	101.98	102.36	0.532641	2.52176	30.68	15.08	0.491525	45.33	57.03	55.7151	1-2	relatively tenuous, short	D medium to long, M labial long	absent	absent	?	?	?	?	?	?	7	7.5	/	?	7.5	?	7.25	7
283	Torvosaurus	Torvosaurus lateral	Megalosauridae	Non-spinosaurid Megalosauroidea Lateral	ML 1100	mx02	gurneyi	Hendrickx et al., 2015	Lourinhã Formation	Cliffs of Praia da Vermelha, Peniche Municipality	Lisbon District	Portugal	Upper Kimmeridgian	Late Jurassic	Adult	Left	mx02	Lateral	45.52	16.4	106.4	118.57	0.360281	2.33743	33.1	16.8	0.507553	55.51	63.06	53.1838	1	extremely tenuous	D well-developped, M short to medium	absent	absent	6.9	5.29	5.48	5.51	?	?	6	8	/	7	8	11	7	8.66667
284	Torvosaurus	Torvosaurus lateral	Megalosauridae	Non-spinosaurid Megalosauroidea Lateral	ML 1853	Isolated	cf. gurneyi	Hendrickx et al., 2015	Lourinhã Formation	Lourinhã	Lisbon District	Portugal	Kimmeridgian-Tithonian	Late Jurassic	?	/	Isolated	Lateral	24.81	13.74	43.53	46.39	0.553809	1.75453	21.5	11.16	0.51907	16.52	29.87	64.3889	1 or 2	very tenuous	D well developped, M short to absent	absent	absent	?	?	?	?	?	?	7.5	9.5	/	7.5	9.5	?	8.5	8.5
285	Torvosaurus	Torvosaurus mesial	Megalosauridae	Non-spinosaurid Megalosauroidea Mesial	ML 962 (Mesial)	Isolated, mesial	cf. gurneyi	Hendrickx et al., 2015	Lourinhã Formation	Cliffs of Praia da Area Branca North, Praia da Area Branca, Lourinhã,	Lisbon District	Portugal	Tithonian	Late Jurassic	Adult	/	Isolated, mesial	Mesial	31.2	20.2	85.8	91.9	0.647436	2.75	?	?	?	30	61.9	67.3558	?	?	DB short	absent	absent	?	?	?	?	?	?	/	8	/	7	8	11	8	8.66667
286	Torvosaurus	Torvosaurus lateral	Megalosauridae	Non-spinosaurid Megalosauroidea Lateral	ML 857	Isolated	cf. gurneyi	Hendrickx et al., 2015	Lourinhã Formation	Lourinhã	Lisbon District	Portugal	Kimmeridgian - Tithonian	Late Jurassic	Adult	/	Isolated	Lateral	32.2	15.8	61.1	67.8	0.490683	1.89752	?	?	?	?	?	?	?	?	?	absent	absent	?	?	?	?	?	?	9	10	/	7	8	10	9.5	8.33333
287	Torvosaurus	Torvosaurus lateral	Megalosauridae	Non-spinosaurid Megalosauroidea Lateral	SHN.067	Isolated	cf. gurneyi	Malafaia et al., 2017	Lourinhã Formation	Almagreira, Peniche	Lisbon District	Portugal	Upper Kimmeridgian - Lowermost Tithonian	Late Jurassic	?	/	Isolated	Lateral	47.99	22.89	141.52	145.07	0.48	2.95	?	?	?	?	?	?	?	?	?	?	?	?	?	?	?	?	?	?	5	?	?	5	?	5	5
288	Torvosaurus	Torvosaurus lateral	Megalosauridae	Non-spinosaurid Megalosauroidea Lateral	SHN.215	Isolated	cf. gurneyi	Malafaia et al., 2017	Lourinhã Formation	Santa Rita, Torres Vedras	Lisbon District	Portugal	Upper Kimmeridgian - Lowermost Tithonian	Late Jurassic	?	/	Isolated	Lateral	25.35	12.62	62.29	63.64	0.5	2.46	?	?	?	?	?	?	?	?	?	?	?	?	?	?	?	?	?	?	7.5	?	?	7.5	?	7.5	7.5
289	Torvosaurus	Torvosaurus lateral	Megalosauridae	Non-spinosaurid Megalosauroidea Lateral	SHN.221	Isolated	cf. gurneyi	Malafaia et al., 2017	Lourinhã Formation	Peralta, Lourinhã	Lisbon District	Portugal	Upper Kimmeridgian - Lowermost Tithonian	Late Jurassic	?	/	Isolated	Lateral	30.65	17.55	79.79	84.91	0.57	2.6	?	?	?	?	?	?	?	?	?	?	?	?	?	?	?	?	?	?	7	?	?	6	?	7	6
290	Torvosaurus	Torvosaurus lateral	Megalosauridae	Non-spinosaurid Megalosauroidea Lateral	SHN.257	Isolated	cf. gurneyi	Malafaia et al., 2017	Lourinhã Formation	?Almagreira, Peniche	Lisbon District	Portugal	Upper Kimmeridgian - Lowermost Tithonian	Late Jurassic	?	/	Isolated	Lateral	22.68	15.15	57.21	60.15	0.67	2.52	?	?	?	?	?	?	?	?	?	?	?	?	?	?	?	?	?	?	8	?	?	8	?	8	8
291	Torvosaurus	Torvosaurus lateral	Megalosauridae	Non-spinosaurid Megalosauroidea Lateral	SHN.266	Isolated	cf. gurneyi	Malafaia et al., 2017	Lourinhã Formation	Praia da Corva, Torres Vedras	Lisbon District	Portugal	Upper Kimmeridgian - Lowermost Tithonian	Late Jurassic	?	/	Isolated	Lateral	26.31	12.02	57.2	66.55	0.46	2.17	?	?	?	?	?	?	?	?	?	?	?	?	?	?	?	?	?	?	8	?	?	10	?	8	10
292	Torvosaurus	Torvosaurus lateral	Megalosauridae	Non-spinosaurid Megalosauroidea Lateral	SHN.268	Isolated	cf. gurneyi	Malafaia et al., 2017	Lourinhã Formation	Porto Dinheiro, Lourinhã	Lisbon District	Portugal	Upper Kimmeridgian - Lowermost Tithonian	Late Jurassic	?	/	Isolated	Lateral	36.27	16.93	91.72	98.86	0.47	2.53	?	?	?	?	?	?	?	?	?	?	?	?	?	?	?	?	?	?	5	?	?	6	?	5	6
293	Torvosaurus	Torvosaurus lateral	Megalosauridae	Non-spinosaurid Megalosauroidea Lateral	SHN.294	Isolated	cf. gurneyi	Malafaia et al., 2017	Lourinhã Formation	Valmitão, Lourinhã	Lisbon District	Portugal	Upper Kimmeridgian - Lowermost Tithonian	Late Jurassic	?	/	Isolated	Lateral	23.23	13.75	52.25	56.71	0.59	2.25	?	?	?	?	?	?	?	?	?	?	?	?	?	?	?	?	?	?	8	?	?	8	?	8	8
294	Torvosaurus	Torvosaurus lateral	Megalosauridae	Non-spinosaurid Megalosauroidea Lateral	SHN.304	Isolated	cf. gurneyi	Malafaia et al., 2017	Lourinhã Formation	Valmitão, Lourinhã	Lisbon District	Portugal	Upper Kimmeridgian - Lowermost Tithonian	Late Jurassic	?	/	Isolated	Lateral	25.11	14.17	65.5	65.99	0.56	2.61	?	?	?	?	?	?	?	?	?	?	?	?	?	?	?	?	?	?	?	?	?	8	?	?	8
295	Torvosaurus	Torvosaurus mesial	Megalosauridae	Non-spinosaurid Megalosauroidea Mesial	SHN.319	Isolated	cf. gurneyi	Malafaia et al., 2017	Lourinhã Formation	Valmitão, Lourinhã	Lisbon District	Portugal	Upper Kimmeridgian - Lowermost Tithonian	Late Jurassic	?	/	Isolated	Mesial	33.69	20.4	93.87	97.05	0.61	2.79	?	?	?	?	?	?	?	?	?	?	?	?	?	?	?	?	?	?	8	?	?	8.5	?	8	8.5
296	Torvosaurus	Torvosaurus lateral	Megalosauridae	Non-spinosaurid Megalosauroidea Lateral	SHN.320	Isolated	cf. gurneyi	Malafaia et al., 2017	Lourinhã Formation	Valmitão, Lourinhã	Lisbon District	Portugal	Upper Kimmeridgian - Lowermost Tithonian	Late Jurassic	?	/	Isolated	Lateral	39.71	21.6	109.51	116.79	0.54	2.76	?	?	?	?	?	?	?	?	?	?	?	?	?	?	?	?	?	?	7	?	?	7	?	7	7
297	Torvosaurus	Torvosaurus lateral	Megalosauridae	Non-spinosaurid Megalosauroidea Lateral	SHN.359a	Isolated	cf. gurneyi	Malafaia et al., 2017	Lourinhã Formation	Porto Novo, Torres Vedras	Lisbon District	Portugal	Upper Kimmeridgian - Lowermost Tithonian	Late Jurassic	?	/	Isolated	Lateral	16.26	7.87	38.76	40.25	0.48	2.38	?	?	?	?	?	?	?	?	?	?	?	?	?	?	?	?	?	?	10	?	?	10	?	10	10
298	Torvosaurus	Torvosaurus lateral	Megalosauridae	Non-spinosaurid Megalosauroidea Lateral	SHN.362	Isolated	cf. gurneyi	Malafaia et al., 2017	Lourinhã Formation	Salir do Porto, Caldas da Rainha	Lisbon District	Portugal	Upper Kimmeridgian - Lowermost Tithonian	Late Jurassic	?	/	Isolated	Lateral	26.39	14.58	52.77	57.95	0.55	2	?	?	?	?	?	?	?	?	?	?	?	?	?	?	?	?	?	?	6.5	?	?	7	?	6.5	7
299	Torvosaurus	Torvosaurus lateral	Megalosauridae	Non-spinosaurid Megalosauroidea Lateral	SHN.364	Isolated	cf. gurneyi	Malafaia et al., 2017	Lourinhã Formation	Praia da Corva, Torres Vedras	Lisbon District	Portugal	Upper Kimmeridgian - Lowermost Tithonian	Late Jurassic	?	/	Isolated	Lateral	21.54	15.58	54.46	54.81	0.72	2.53	?	?	?	?	?	?	?	?	?	?	?	?	?	?	?	?	?	?	?	?	?	8	?	?	8
300	Torvosaurus	Torvosaurus lateral	Megalosauridae	Non-spinosaurid Megalosauroidea Lateral	SHN.374	Isolated	cf. gurneyi	Malafaia et al., 2017	Lourinhã Formation	Praia da Corva, Torres Vedras	Lisbon District	Portugal	Upper Kimmeridgian - Lowermost Tithonian	Late Jurassic	?	/	Isolated	Lateral	47.09	16.75	104.99	117.91	0.36	2.23	?	?	?	?	?	?	?	?	?	?	?	?	?	?	?	?	?	?	6	?	?	7	?	6	7
301	Torvosaurus	Torvosaurus lateral	Megalosauridae	Non-spinosaurid Megalosauroidea Lateral	SHN.401	Isolated	cf. gurneyi	Malafaia et al., 2017	Lourinhã Formation	Porto Dinheiro, Lourinhã	Lisbon District	Portugal	Upper Kimmeridgian - Lowermost Tithonian	Late Jurassic	?	/	Isolated	Lateral	48.35	20.64	145.55	152.84	0.43	3.01	?	?	?	?	?	?	?	?	?	?	?	?	?	?	?	?	?	?	7	?	?	6	?	7	6
302	Torvosaurus	Torvosaurus lateral	Megalosauridae	Non-spinosaurid Megalosauroidea Lateral	SHN.440	Isolated	cf. gurneyi	Malafaia et al., 2017	Lourinhã Formation	Valmitão, Lourinhã	Lisbon District	Portugal	Upper Kimmeridgian - Lowermost Tithonian	Late Jurassic	?	/	Isolated	Lateral	25.75	14.04	70.29	78.49	0.55	2.73	?	?	?	?	?	?	?	?	?	?	?	?	?	?	?	?	?	?	/	?	?	7	?	0	7
303	Torvosaurus	Torvosaurus lateral	Megalosauridae	Non-spinosaurid Megalosauroidea Lateral	SHN.441	Isolated	cf. gurneyi	Malafaia et al., 2017	Lourinhã Formation	Praia dos Frades, Peniche	Lisbon District	Portugal	Upper Kimmeridgian - Lowermost Tithonian	Late Jurassic	?	/	Isolated	Lateral	42.44	23.49	123.67	129.76	0.55	2.91	?	?	?	?	?	?	?	?	?	?	?	?	?	?	?	?	?	?	7.5	?	?	6.5	?	7.5	6.5
304	Torvosaurus	Torvosaurus lateral	Megalosauridae	Non-spinosaurid Megalosauroidea Lateral	SHN.442	Isolated	cf. gurneyi	Malafaia et al., 2017	Lourinhã Formation	Valmitão, Lourinhã	Lisbon District	Portugal	Upper Kimmeridgian - Lowermost Tithonian	Late Jurassic	?	/	Isolated	Lateral	29.1	16.41	84.13	86.24	0.56	2.89	?	?	?	?	?	?	?	?	?	?	?	?	?	?	?	?	?	?	?	?	?	7	?	?	7
305	Torvosaurus	Torvosaurus lateral	Megalosauridae	Non-spinosaurid Megalosauroidea Lateral	SHN.470	Isolated	cf. gurneyi	Malafaia et al., 2017	Lourinhã Formation	Porto Dinheiro, Lourinhã	Lisbon District	Portugal	Upper Kimmeridgian - Lowermost Tithonian	Late Jurassic	?	/	Isolated	Lateral	48.38	19.94	145.54	152.44	0.41	3.01	?	?	?	?	?	?	?	?	?	?	?	?	?	?	?	?	?	?	7	?	?	7.5	?	7	7.5
306	cf. Baryonychinae	cf. Baryonychinae lateral	Spinosauridae	Spinosauridae	XMDFEC V0010	Isolated	sp.	Young et al., 2019 (C.H. pers. measurements)	Majiacun Formation	Sanlimiao	Xixia county, Henan Province	China	Middle Santonian	Late Cretaceous	?	/	Isolated	Lateral	14.57	8.91	40.69	41.63	0.611531	2.79272	10.85	6.77	0.623963	6.03	35.6	85.5153	0	absent	absent	absent	absent	?	?	?	?	?	?	?	15.83	25.83	?	15	25	20.83	20
307	Suchosaurus	Suchosaurus lateral	Spinosauridae	Spinosauridae	BMNH R36536 (Owen, 1841)	Isolated	cultridens	Young et al., 2019 (C.H. pers. measurements)	Wealden	Cuckfield	Sussex	U.K.	Hauterivian-Barremian	Early Cretaceous	?	/	Isolated	Lateral	15.21	13.17	32.8	34.19	0.865878	2.15648	11.43	9.33	0.816273	?	?	?	0	absent	absent	10	11 or 12	4.47	4.35	4.35	4.54	?	?	?	?	?	?	30	35	?	35
308	Baryonyx	Baryonyx mesial	Spinosauridae	Spinosauridae	BMNH R9951	pmx04	walkeri	Hendrickx et al., 2015	Wealden Series, Upper Weald Clay	Wallis Wood	Surrey	U.K.	Barremian	Early Cretaceous	Fairly mature	Right	pmx04	Mesial	13.29	11.19	33.32	33.53	0.841986	2.50715	10.34	8.73	0.844294	0	33.53	100	0	absent	absent	absent	4-5?	?	?	?	?	?	?	?	35	?	?	?	45	35	45
309	Baryonyx	Baryonyx mesial	Spinosauridae	Spinosauridae	BMNH R9951	pmx06	walkeri	Hendrickx et al., 2015	Wealden Series, Upper Weald Clay	Wallis Wood	Surrey	U.K.	Barremian	Early Cretaceous	Fairly mature	Right	pmx06	Mesial	10.72	8.54	25.41	27.61	0.796642	2.37034	7.74	6.98	0.901809	?	?	?	0	absent	absent	absent	4	?	?	?	?	?	?	?	35	?	?	35	?	?	35
310	Baryonyx	Baryonyx mesial	Spinosauridae	Spinosauridae	BMNH R9951	pmx07	walkeri	Hendrickx et al., 2015	Wealden Series, Upper Weald Clay	Wallis Wood	Surrey	U.K.	Barremian	Early Cretaceous	Fairly mature	Right	pmx07	Mesial	8.25	7.65	20.82	21.87	0.927273	2.52364	6.69	5.47	0.817638	0	21.87	100	0	absent	absent	absent	>3	?	?	?	?	?	?	35	35	?	35	30	40	35	35
311	Baryonyx	Baryonyx lateral	Spinosauridae	Spinosauridae	BMNH R9951	mx5	walkeri	Hendrickx et al., 2015	Wealden Series, Upper Weald Clay	Wallis Wood	Surrey	U.K.	Barremian	Early Cretaceous	Fairly mature	Left	mx5	Lateral	18.16	13.46	32.49	38.61	0.741189	1.7891	14.61	10.38	0.710472	0	38.61	100	0	absent	absent	absent	absent	?	?	?	?	?	?	25	30	?	?	?	?	27.5	?
312	Baryonyx	Baryonyx lateral	Spinosauridae	Spinosauridae	BMNH R9951, large with plaster block 14	Isolated	walkeri	Hendrickx et al., 2015	Wealden Series, Upper Weald Clay	Wallis Wood	Surrey	U.K.	Barremian	Early Cretaceous	Fairly mature	/	Isolated	Lateral	16.93	13.62	33.26	33.98	0.804489	1.96456	12.06	9.68	0.802653	-2.66	36.64	107.828	0	absent	absent	absent	absent	?	?	?	?	?	?	30	?	?	?	?	?	30	?
313	Baryonyx	Baryonyx lateral	Spinosauridae	Spinosauridae	BMNH R9951, small, complete with transparent glue on the root tip	Isolated	walkeri	Hendrickx et al., 2015	Wealden Series, Upper Weald Clay	Wallis Wood	Surrey	U.K.	Barremian	Early Cretaceous	Fairly mature	/	Isolated	Lateral	12.06	10.01	26.63	26.8	0.830017	2.20813	9.35	6.95	0.743316	-2.22	29.02	108.284	0	absent	absent	absent	8	?	?	?	?	?	?	40	35	?	30	35	35	37.5	33.33
314	Baryonyx	Baryonyx lateral	Spinosauridae	Spinosauridae	BMNH R9951, root cut diagonally with distal root on it	Isolated	walkeri	Hendrickx et al., 2015	Wealden Series, Upper Weald Clay	Wallis Wood	Surrey	U.K.	Barremian	Early Cretaceous	Fairly mature	/	Isolated	Lateral	13.4	10.4	29.39	28.97	0.776119	2.19328	10.68	7.73	0.723783	-1.77	30.74	106.11	0	absent	absent	absent	absent	?	?	?	?	?	?	40	35	?	30	35	40	37.5	35
315	Baryonyx	Baryonyx lateral	Spinosauridae	Spinosauridae	BMNH R9951, quite big with black dots on the upper root	Isolated	walkeri	Hendrickx et al., 2015	Wealden Series, Upper Weald Clay	Wallis Wood	Surrey	U.K.	Barremian	Early Cretaceous	Fairly mature	/	Isolated	Lateral	15.31	11.75	33.69	33.83	0.767472	2.20052	11.22	9.52	0.848485	?	?	?	0	absent	absent	1	6	?	?	?	?	?	?	40	35	?	?	40	45	37.5	42.5
316	Baryonyx	Baryonyx lateral	Spinosauridae	Spinosauridae	BMNH R9951, very small with very long root with white fractures	Isolated	walkeri	Hendrickx et al., 2015	Wealden Series, Upper Weald Clay	Wallis Wood	Surrey	U.K.	Barremian	Early Cretaceous	Fairly mature	/	Isolated	Lateral	9.01	8.44	20.79	21.05	0.936737	2.30744	7.67	5.99	0.780965	0	21.05	100	0	absent	absent	absent	7	?	?	?	?	?	?	40	35	45	40	35	40	40	38.33
317	Baryonyx	Baryonyx lateral	Spinosauridae	Spinosauridae	BMNH R9951, dark, missing entire root	Isolated	walkeri	Hendrickx et al., 2015	Wealden Series, Upper Weald Clay	Wallis Wood	Surrey	U.K.	Barremian	Early Cretaceous	Fairly mature	/	Isolated	Lateral	11.18	11.15	25.77	26.82	0.997317	2.30501	8.96	7.8	0.870536	?	?	?	0	absent	absent	absent	7	?	?	?	?	?	?	?	?	?	35	?	?	?	35
318	Baryonyx	Baryonyx lateral	Spinosauridae	Spinosauridae	BMNH R9951, 22 quite small, complete, root complete, fractured on lingual side	Isolated	walkeri	Hendrickx et al., 2015	Wealden Series, Upper Weald Clay	Wallis Wood	Surrey	U.K.	Barremian	Early Cretaceous	Fairly mature	/	Isolated	Lateral	11.79	10.73	24.15	26.79	0.910093	2.04835	9.64	7.57	0.78527	0	26.79	100	0	absent	absent	absent	6	?	?	?	?	?	?	?	30	?	30	35	40	30	35
319	Baryonyx	Baryonyx lateral	Spinosauridae	Spinosauridae	BMNH R9951, very small with part of the root	Isolated	walkeri	Hendrickx et al., 2015	Wealden Series, Upper Weald Clay	Wallis Wood	Surrey	U.K.	Barremian	Early Cretaceous	Fairly mature	/	Isolated	Lateral	8.82	7.5	16.86	18.01	0.85034	1.91156	7.97	5.86	0.735257	0	18.01	100	0	absent	absent	?	?	?	?	?	?	?	?	?	?	?	?	?	?	?	?
320	Baryonyx	Baryonyx lateral	Spinosauridae	Spinosauridae	BMNH R9951, small with tip recontstucted block 14	Isolated	walkeri	Hendrickx et al., 2015	Wealden Series, Upper Weald Clay	Wallis Wood	Surrey	U.K.	Barremian	Early Cretaceous	Fairly mature	/	Isolated	Lateral	9.3	7.95	17.91	17.96	0.854839	1.92581	7.9	6.27	0.793671	0	17.96	100	0	absent	absent	absent	absent	?	?	?	?	?	?	?	?	?	?	35	40	?	37.5
321	Baryonyx	Baryonyx lateral	Spinosauridae	Spinosauridae	BMNH R9951, small with root very elongated block 14	Isolated	walkeri	Hendrickx et al., 2015	Wealden Series, Upper Weald Clay	Wallis Wood	Surrey	U.K.	Barremian	Early Cretaceous	Fairly mature	/	Isolated	Lateral	9.27	7.34	20.44	19.56	0.791802	2.20496	7.4	6.11	0.825676	-1.39	20.95	?	0	absent	absent	absent	?	?	?	?	?	?	?	?	45	?	?	35	?	45	35
322	Baryonyx	Baryonyx lateral	Spinosauridae	Spinosauridae	BMNH R9951, 26 with large plastic stuff on the middle root	Isolated	walkeri	Hendrickx et al., 2015	Wealden Series, Upper Weald Clay	Wallis Wood	Surrey	U.K.	Barremian	Early Cretaceous	Fairly mature	/	Isolated	Lateral	15.84	13.25	36.48	37.69	0.83649	2.30303	12.39	9.72	0.784504	0	37.69	100	0	absent	absent	absent	7	?	?	?	?	?	?	?	40	?	30	35	?	40	32.5
323	Baryonyx	Baryonyx lateral	Spinosauridae	Spinosauridae	BMNH R9951, 26 large with long root, tip worn	Isolated	walkeri	Hendrickx et al., 2015	Wealden Series, Upper Weald Clay	Wallis Wood	Surrey	U.K.	Barremian	Early Cretaceous	Fairly mature	/	Isolated	Lateral	17.11	14.29	30.93	33.33	0.835184	1.80771	13.51	10.46	0.774241	0	33.33	100	0	absent	absent	absent	7	?	?	?	?	?	?	30	35	?	?	?	35	32.5	35
324	Baryonyx	Baryonyx lateral	Spinosauridae	Spinosauridae	BMNH R9951, 278 broken	Isolated	walkeri	Hendrickx et al., 2015	Wealden Series, Upper Weald Clay	Wallis Wood	Surrey	U.K.	Barremian	Early Cretaceous	Fairly mature	/	Isolated	Lateral	19.3	14.41	42.83	41.67	0.746632	2.21917	14.3	10.68	0.746853	-2.57	44.24	?	0	absent	absent	absent	absent	?	?	?	?	?	?	35	30	35	35	30	40	33.33	35
325	Baryonyx	Baryonyx lateral	Spinosauridae	Spinosauridae	BMNH R9951, small, lacking root and part of the base	Isolated	walkeri	Hendrickx et al., 2015	Wealden Series, Upper Weald Clay	Wallis Wood	Surrey	U.K.	Barremian	Early Cretaceous	Fairly mature	/	Isolated	Lateral	12.73	9.3	21.1	25.01	0.730558	1,8	11.69	8.35	0.714286	0	25.01	100	4	very tenuous	absent	absent	absent	?	?	?	?	?	?	30	30	?	25	30	30	30	28.33
326	Baryonyx	Baryonyx mesial	Spinosauridae	Spinosauridae	BMNH R9951	pm04	walkeri	Smith et al., 2005	Wealden Series, Upper Weald Clay	Wallis Wood	Surrey	U.K.	Barremian	Early Cretaceous	Fairly mature	Right	pm04	Mesial	13.06	11.24	31.37	32.29	0.860643	2.40199	?	?	?	?	?	?	?	?	?	?	?	?	?	?	?	82.96	0.34	?	35	?	?	35	?	?	35
327	Baryonyx	Baryonyx mesial	Spinosauridae	Spinosauridae	BMNH R9951	pm06	walkeri	Smith et al., 2005	Wealden Series, Upper Weald Clay	Wallis Wood	Surrey	U.K.	Barremian	Early Cretaceous	Fairly mature	Right	pm06	Mesial	10.49	7.9	23.72	24.77	0.753098	2.2612	?	?	?	?	?	?	?	?	?	?	?	?	?	?	?	80.56	0.35	?	35	?	?	35	?	?	35
328	Baryonyx	Baryonyx lateral	Spinosauridae	Spinosauridae	BMNH R9951a	Isolated	walkeri	Smith et al., 2005	Wealden Series, Upper Weald Clay	Wallis Wood	Surrey	U.K.	Barremian	Early Cretaceous	Fairly mature	/	Isolated	Lateral	11.69	11.19	28.72	29.22	0.957228	2.4568	?	?	?	?	?	?	?	?	?	?	?	?	?	?	?	82.42	0.36	?	35	?	?	35	?	?	35
329	Baryonyx	Baryonyx lateral	Spinosauridae	Spinosauridae	BMNH R9951d	Isolated	walkeri	Smith et al., 2005	Wealden Series, Upper Weald Clay	Wallis Wood	Surrey	U.K.	Barremian	Early Cretaceous	Fairly mature	/	Isolated	Lateral	15.76	12.05	34.8	37.41	0.764594	2.20812	?	?	?	?	?	?	?	?	?	?	?	?	?	?	?	83.39	0.3	?	35	?	?	35	?	?	35
330	Baryonyx	Baryonyx lateral	Spinosauridae	Spinosauridae	BMNH R9951e	Isolated	walkeri	Smith et al., 2005	Wealden Series, Upper Weald Clay	Wallis Wood	Surrey	U.K.	Barremian	Early Cretaceous	Fairly mature	/	Isolated	Lateral	13.18	10.88	29.67	30.52	0.825493	2.25114	?	?	?	?	?	?	?	?	?	?	?	?	?	?	?	82.6	0.32	?	35	?	?	35	?	?	35
331	Baryonyx	Baryonyx lateral	Spinosauridae	Spinosauridae	BMNH R9951f	Isolated	walkeri	Smith et al., 2005	Wealden Series, Upper Weald Clay	Wallis Wood	Surrey	U.K.	Barremian	Early Cretaceous	Fairly mature	/	Isolated	Lateral	12.12	10.35	27.19	30.46	0.85396	2.2434	?	?	?	?	?	?	?	?	?	?	?	?	?	?	?	81.14	0.34	?	35	?	?	35	?	?	35
332	Baryonyx	Baryonyx lateral	Spinosauridae	Spinosauridae	BMNH R9951h	Isolated	walkeri	Smith et al., 2005	Wealden Series, Upper Weald Clay	Wallis Wood	Surrey	U.K.	Barremian	Early Cretaceous	Fairly mature	/	Isolated	Lateral	16.42	15.19	38.55	43.88	0.925091	2.34775	?	?	?	?	?	?	?	?	?	?	?	?	?	?	?	83.6	0.32	?	35	?	?	35	?	?	35
333	Baryonyx	Baryonyx lateral	Spinosauridae	Spinosauridae	BMNH R9951n	Isolated	walkeri	Smith et al., 2005	Wealden Series, Upper Weald Clay	Wallis Wood	Surrey	U.K.	Barremian	Early Cretaceous	Fairly mature	/	Isolated	Lateral	16.47	13.65	34.12	38.11	0.82878	2.07165	?	?	?	?	?	?	?	?	?	?	?	?	?	?	?	83.08	0.29	?	35	?	?	35	?	?	35
334	Suchomimus	Suchomimus lateral	Spinosauridae	Spinosauridae	UC G69-5 (biggest, with black plastic base)	Isolated	tenerensis	Hendrickx et al., 2015	Elrhaz Formation	“Gadoufaoua”	Ténéré Desert	Niger	Aptian-Albian	'Middle Cretaceous'	?	/	Isolated	Lateral	18.2	14.2	54	57.8	0.78022	2.96703	13.2	10.4	0.787879	10.1	47.7	82.526	0	?	?	2	absent	?	?	?	?	?	?	?	?	?	?	?	?	?	?
335	Suchomimus	Suchomimus lateral	Spinosauridae	Spinosauridae	UC G67-1	Isolated	tenerensis	Hendrickx et al., 2015	Elrhaz Formation	“Gadoufaoua”	Ténéré Desert	Niger	Aptian-Albian	'Middle Cretaceous'	?	/	Isolated	Lateral	18.6	14.9	48.5	53	0.801075	2.60753	13.6	9.2	0.676471	-5.3	58.3	110	6	well visible	?	>5	9	1.2	1.5	1.2	1.4	?	?	35	35	35	30	25	30	35	28.33
336	Suchomimus	Suchomimus lateral	Spinosauridae	Spinosauridae	UC G67-8	Isolated	tenerensis	Hendrickx et al., 2015	Elrhaz Formation	“Gadoufaoua”	Ténéré Desert	Niger	Aptian-Albian	'Middle Cretaceous'	?	/	Isolated	Lateral	12.4	8.2	32.6	33.3	0.66129	2.62903	8.4	5.7	0.678571	-4.1	37.4	112.312	0	?	?	6	6	?	?	?	?	?	?	?	?	?	?	?	?	?	?
337	Suchomimus	Suchomimus lateral	Spinosauridae	Spinosauridae	UC G35-9 (biggest one)	Isolated	tenerensis	Hendrickx et al., 2015	Elrhaz Formation	“Gadoufaoua”	Ténéré Desert	Niger	Aptian-Albian	'Middle Cretaceous'	?	/	Isolated	Lateral	15	11.3	40.4	42.4	0.753333	2.69333	10.7	6.8	0.635514	-4.2	46.6	109.906	5	well visible	?	6	5	?	?	?	?	?	?	?	30	30	25	?	30	?	?
338	Suchomimus	Suchomimus lateral	Spinosauridae	Spinosauridae	UC G35-9 (smallest one)	Isolated	tenerensis	Hendrickx et al., 2015	Elrhaz Formation	“Gadoufaoua”	Ténéré Desert	Niger	Aptian-Albian	'Middle Cretaceous'	?	/	Isolated	Lateral	15.2	11.3	32.4	34	0.743421	2.13158	10.6	7.5	0.707547	?	?	?	4	?	?	6	7	1.8	2.4	2	2.3	?	?	?	30	?	32.5	30	40	30	34.16
339	Suchomimus	Suchomimus lateral	Spinosauridae	Spinosauridae	UC G43-4	Isolated	tenerensis	Hendrickx et al., 2015	Elrhaz Formation	“Gadoufaoua”	Ténéré Desert	Niger	Aptian-Albian	'Middle Cretaceous'	?	/	Isolated	Lateral	18	14.4	36.9	46.5	0.8	2.05	13.6	9.8	0.720588	?	?	?	0	?	?	6	6	2.8	3	2.4	3.4	?	?	?	?	?	?	?	?	?	?
340	Suchomimus	Suchomimus lateral	Spinosauridae	Spinosauridae	UC G26-5 (biggest one)	Isolated	tenerensis	Hendrickx et al., 2015	Elrhaz Formation	“Gadoufaoua”	Ténéré Desert	Niger	Aptian-Albian	'Middle Cretaceous'	?	/	Isolated	Lateral	15.9	10.8	41.7	47.8	0.679245	2.62264	11.6	7.8	0.672414	-6.5	54.3	113.598	0	?	?	8	2	0.5	0.5	0.1	0.1	?	?	30	30	30	25	25	30	30	26.66
341	Suchomimus	Suchomimus lateral	Spinosauridae	Spinosauridae	UC G73-3 (medium laterally compressed one)	Isolated	tenerensis	Hendrickx et al., 2015	Elrhaz Formation	“Gadoufaoua”	Ténéré Desert	Niger	Aptian-Albian	'Middle Cretaceous'	?	/	Isolated	Lateral	15.1	9.8	41.2	43.1	0.649007	2.72848	10.8	6.8	0.62963	-5.9	49	113.689	0	?	?	8	absent?	2.2	1.3	1.8	1.7	?	?	30	25	30	25	25	30	28.33	26.66
342	Suchomimus	Suchomimus lateral	Spinosauridae	Spinosauridae	UC G73-3 (small laterally compressed one with worn tip)	Isolated	tenerensis	Hendrickx et al., 2015	Elrhaz Formation	“Gadoufaoua”	Ténéré Desert	Niger	Aptian-Albian	'Middle Cretaceous'	?	/	Isolated	Lateral	9.4	7.8	26.5	28.6	0.829787	2.81915	7.9	6.2	0.78481	-1.8	30.4	106.294	0	?	?	6	7	1.4	1.2	1	1.3	?	?	?	?	?	?	?	?	?	?
343	Suchomimus	Suchomimus lateral	Spinosauridae	Spinosauridae	UC G34-12 (most completed laterally compressed one)	Isolated	tenerensis	Hendrickx et al., 2015	Elrhaz Formation	“Gadoufaoua”	Ténéré Desert	Niger	Aptian-Albian	'Middle Cretaceous'	?	/	Isolated	Lateral	13.4	9.7	39.3	41	0.723881	2.93284	9.5	6.7	0.705263	0	41	100	0	?	?	absent	absent	0.6	0.9	0.8	0.7	?	?	30	27.5	?	27.5	25	30	28.75	27.5
344	Suchomimus	Suchomimus lateral	Spinosauridae	Spinosauridae	UC G100-4 (small one)	Isolated	tenerensis	Hendrickx et al., 2015	Elrhaz Formation	“Gadoufaoua”	Ténéré Desert	Niger	Aptian-Albian	'Middle Cretaceous'	?	/	Isolated	Lateral	14.5	9.5	37.3	39	0.655172	2.57241	10.6	6.7	0.632075	0	39	100	0	?	?	absent	>3	1.8	1	0.9	1.2	?	?	30	30	?	30	32.5	?	30	31.25
345	Suchomimus	Suchomimus lateral	Spinosauridae	Spinosauridae	UC G22-7 (complete one with root)	Isolated	tenerensis	Hendrickx et al., 2015	Elrhaz Formation	“Gadoufaoua”	Ténéré Desert	Niger	Aptian-Albian	'Middle Cretaceous'	?	/	Isolated	Lateral	12.8	9.8	38.5	39.5	0.765625	3.00781	9	6.6	0.733333	0	39.5	100	0	?	?	5	5	2	2.6	?	2.3	?	?	?	?	?	?	35	?	?	35
346	Suchomimus	Suchomimus lateral	Spinosauridae	Spinosauridae	UC G34-12 (with big mesial wear facet)	Isolated	tenerensis	Hendrickx et al., 2015	Elrhaz Formation	“Gadoufaoua”	Ténéré Desert	Niger	Aptian-Albian	'Middle Cretaceous'	?	/	Isolated	Lateral	17.2	11.6	38.8	38	0.674419	2.25581	10.5	7.9	0.752381	?	?	?	0	?	?	5	5	4.5	4.1	3.9	3.3	?	?	?	?	?	?	32.5	?	?	32.5
347	Suchomimus	Suchomimus lateral	Spinosauridae	Spinosauridae	UC G34-7 (smallest complete one)	Isolated	tenerensis	Hendrickx et al., 2015	Elrhaz Formation	“Gadoufaoua”	Ténéré Desert	Niger	Aptian-Albian	'Middle Cretaceous'	?	/	Isolated	Lateral	9	8.3	18.2	19.5	0.922222	2.02222	6.5	5.4	0.830769	0	19.5	100	0	?	?	10	8	0.1	0.1	0.1	0.1	?	?	?	30	?	?	30	?	30	30
348	Suchomimus	Suchomimus lateral	Spinosauridae	Spinosauridae	UC G34-7 (biggest complete one)	Isolated	tenerensis	Hendrickx et al., 2015	Elrhaz Formation	“Gadoufaoua”	Ténéré Desert	Niger	Aptian-Albian	'Middle Cretaceous'	?	/	Isolated	Lateral	8	7	23.8	21.4	0.875	2.975	6	4.9	0.816667	0	21.4	100	0	?	?	9	9	0.2	0.2	0.2	0.2	?	?	?	?	?	?	?	30	?	30
349	Suchomimus	Suchomimus lateral	Spinosauridae	Spinosauridae	UC G54-4 (most complete one)	Isolated	tenerensis	Hendrickx et al., 2015	Elrhaz Formation	“Gadoufaoua”	Ténéré Desert	Niger	Aptian-Albian	'Middle Cretaceous'	?	/	Isolated	Lateral	19.9	15	47.6	47.8	0.753769	2.39196	14.7	10.6	0.721088	4	43.8	91.6318	0	?	?	5	5	4.6	3.2	4.3	3.3	?	?	30	25	?	25	25	25	27.5	25
350	Suchomimus	Suchomimus lateral	Spinosauridae	Spinosauridae	UC G89-5	Isolated	tenerensis	Smith et al., 2005	Elrhaz Formation	“Gadoufaoua”	Ténéré Desert	Niger	Aptian-Albian	'Middle Cretaceous'	?	/	Isolated	Lateral	18.9	15.2	62.94	70.64	0.804233	3.33016	?	?	?	?	?	?	?	?	?	?	?	?	?	?	?	85.78	0.3	?	?	?	?	27.5	?	?	27.5
351	Suchomimus	Suchomimus lateral	Spinosauridae	Spinosauridae	UC G54-4	Isolated	tenerensis	Smith et al., 2005	Elrhaz Formation	“Gadoufaoua”	Ténéré Desert	Niger	Aptian-Albian	'Middle Cretaceous'	?	/	Isolated	Lateral	20.8	18.1	56.94	64.22	0.870192	2.7375	?	?	?	?	?	?	?	?	?	?	?	?	?	?	?	85.54	0.25	?	?	?	?	27	?	?	27
352	Suchomimus	Suchomimus lateral	Spinosauridae	Spinosauridae	UC G48-9	Isolated	tenerensis	Smith et al., 2005	Elrhaz Formation	“Gadoufaoua”	Ténéré Desert	Niger	Aptian-Albian	'Middle Cretaceous'	?	/	Isolated	Lateral	18.7	13.3	52.66	60.2	0.71123	2.81604	?	?	?	?	?	?	?	?	?	?	?	?	?	?	?	85.06	0.29	?	?	?	?	35	?	?	35
353	Suchomimus	Suchomimus lateral	Spinosauridae	Spinosauridae	UC G67-1	Isolated	tenerensis	Smith et al., 2005	Elrhaz Formation	“Gadoufaoua”	Ténéré Desert	Niger	Aptian-Albian	'Middle Cretaceous'	?	/	Isolated	Lateral	19.2	14.4	54.34	55.6	0.75	2.83021	?	?	?	?	?	?	?	?	?	?	?	?	?	?	?	85.94	0.28	?	?	?	?	29	?	?	29
354	Irritator	Irritator lateral	Spinosauridae	Spinosauridae	SMNS 58022	mx3rd last	challengeri	Hendrickx et al., 2015	Santana Formation	Santana do Carici	Araripe Plateau	Brazil	Aptian	'Middle Cretaceous'	Immature?	Right	mx3rd last	Lateral	8.2	7.13	21	19.8	0.869512	2.56098	6.44	5.21	0.809006	0	19.8	100	0	absent	/	8	?	?	?	?	?	?	?	/	/	/	/	/	/	/	/
355	Sinopliosaurus	Sinopliosaurus lateral	Spinosauridae	Spinosauridae	IVPP V4793.1	Isolated	fusuiensis	Young et al., 2019 (C.H. pers. measurements)	Napai Formation	Fusui County	Guangxi Zhuang Autonomous Region	China	Early Cretaceous	Early Cretaceous	?	/	Isolated	Lateral	16.22	11.55	56.23	62.05	0.712084	3.46671	12.53	9.75	0.778132	?	?	?	0	absent	/	12	10-13	?	?	?	?	?	?	/	/	/	/	/	/	/	/
356	Spinosaurinae indet.	Spinosaurus lateral	Spinosauridae	Spinosauridae	SMA 0173	Isolated	indet.	Hendrickx et al., 2015 (formerly known as Spinosaurus)	Kem Kem Beds	Kem Kem	Meknès-Tafilalet	Morocco	Cenomanian	'Middle Cretaceous'	?	/	Isolated	Lateral	27.78	23.86	81.63	85.96	0.858891	2.93844	22.6	17.25	0.763274	0	85.96	100	0	absent	/	7	11	?	?	?	?	?	?	/	/	/	/	/	/	/	/
357	Spinosaurinae indet.	Spinosaurus lateral	Spinosauridae	Spinosauridae	MSNM V6422	Isolated	indet.	Hendrickx et al., 2015 (formerly known as Spinosaurus)	Kem Kem Beds	Kem Kem, Taouz	Meknès-Tafilalet	Morocco	Cenomanian	'Middle Cretaceous'	?	/	Isolated	Lateral	26.28	23.27	55.17	59	0.885464	2.09932	?	?	?	0	59	100	0	absent	/	14	<7	?	?	?	?	?	?	/	/	/	/	/	/	/	/
358	Spinosaurinae indet.	Spinosaurus lateral	Spinosauridae	Spinosauridae	MSNM V3976	Isolated	indet.	Hendrickx et al., 2015 (formerly known as Spinosaurus)	Kem Kem Beds	Kem Kem, Taouz	Meknès-Tafilalet	Morocco	Cenomanian	'Middle Cretaceous'	?	/	Isolated	Lateral	18.08	17.12	45.62	50.41	0.946903	2.52323	14.5	12.13	0.836552	?	?	?	0	absent	/	15	12	?	?	?	?	?	?	/	/	/	/	/	/	/	/
359	Spinosaurinae indet.	Spinosaurus lateral	Spinosauridae	Spinosauridae	GZG.V.19990	Isolated	indet.	Richter et al., 2013	Kem Kem Beds	Kem Kem	Meknès-Tafilalet	Morocco	Cenomanian	'Middle Cretaceous'	?	/	Isolated	Lateral	13	11.5	29.8	30.8	0.884615	2.29231	?	?	?	?	?	?	?	?	?	?	?	?	?	?	?	?	?	/	/	/	/	/	/	/	/
360	Spinosaurinae indet.	Spinosaurus lateral	Spinosauridae	Spinosauridae	GZG.V.20001	Isolated	indet.	Richter et al., 2013	Kem Kem Beds	Kem Kem	Meknès-Tafilalet	Morocco	Cenomanian	'Middle Cretaceous'	?	/	Isolated	Lateral	14.1	11	32.2	32.8	0.780142	2.28369	?	?	?	?	?	?	?	?	?	?	?	?	?	?	?	?	?	/	/	/	/	/	/	/	/
361	Spinosaurinae indet.	Spinosaurus lateral	Spinosauridae	Spinosauridae	GZG.V.20011	Isolated	indet.	Richter et al., 2013	Kem Kem Beds	Kem Kem	Meknès-Tafilalet	Morocco	Cenomanian	'Middle Cretaceous'	?	/	Isolated	Lateral	13.4	10.1	37.9	38	0.753731	2.82836	?	?	?	?	?	?	?	?	?	?	?	?	?	?	?	?	?	/	/	/	/	/	/	/	/
362	Spinosaurinae indet.	Spinosaurus lateral	Spinosauridae	Spinosauridae	GZG.V.20030	Isolated	indet.	Richter et al., 2013	Kem Kem Beds	Kem Kem	Meknès-Tafilalet	Morocco	Cenomanian	'Middle Cretaceous'	?	/	Isolated	Lateral	11.9	9.2	20.5	22.5	0.773109	1.72269	?	?	?	?	?	?	?	?	?	?	?	?	?	?	?	?	?	/	/	/	/	/	/	/	/
363	Spinosaurinae indet.	Spinosaurus lateral	Spinosauridae	Spinosauridae	GZG.V.20034	Isolated	indet.	Richter et al., 2013	Kem Kem Beds	Kem Kem	Meknès-Tafilalet	Morocco	Cenomanian	'Middle Cretaceous'	?	/	Isolated	Lateral	17.5	12.1	48	48.5	0.691429	2.74286	?	?	?	?	?	?	?	?	?	?	?	?	?	?	?	?	?	/	/	/	/	/	/	/	/
364	Chienkosaurus	Chienkosaurus lateral	Metriacanthosauridae	Metriacanthosauridae Lateral	IVPP V237.1	Isolated mesial	ceratosauroides	This study	Shangshaximiao Formation	Chentsianyen escarpment, Guangyuan	Sichuan	China	early Late Jurassic	Late Jurassic	?	/	Isolated mesial	Mesial	15.78	11.94	36.42	38.53	0.756654	2.30798	13.49	9.35	0.693106	6.5	32.03	83.13	2 to 3	labial, tenous	DC, short to medium on labial side, no MC	absent	absent	0.8	0.89	0.81	0.71	?	?	13	11.66	19	12	12	16.5	14.55	13.5
365	Sinraptor	Sinraptor lateral	Metriacanthosauridae	Metriacanthosauridae Lateral	IVPP V10600	mx3	dongi	This study	Shishugou Formation	Jiangjunmiao	Xinjiang	China	Oxfordian	Late Jurassic	Adult?	Right	mx3	Lateral	24.39	12.3	59.44	59.5	0.504305	2.43706	21.43	10.27	0.479235	-4.7	64.2	100	2-3	labial & lingual, very tenuous	DC well-developped, MC short	absent	absent	?	?	?	?	?	?	9.375	11	21.66	?	10	20.83	14.01	15.415
366	Sinraptor	Sinraptor lateral	Metriacanthosauridae	Metriacanthosauridae Lateral	IVPP V10600	mx4	dongi	This study	Shishugou Formation	Jiangjunmiao	Xinjiang	China	Oxfordian	Late Jurassic	Adult?	Right	mx4	Lateral	26.63	10.14	63.43	65.47	0.380774	2.3819	22.47	9.9	0.440587	-2.4	67.87	100	3	labial & lingual, tenuous	DC well-developped, MC moderate to long	absent	absent	?	?	?	?	?	?	9	10	18.75	9.5	10	15	12.58	11.5
367	Sinraptor	Sinraptor lateral	Metriacanthosauridae	Metriacanthosauridae Lateral	IVPP V10600	mx6	dongi	This study	Shishugou Formation	Jiangjunmiao	Xinjiang	China	Oxfordian	Late Jurassic	Adult?	Right	mx6	Lateral	26.74	10.22	60.07	63.48	0.382199	2.24645	22.75	9.3	0.408791	-5.25	68.73	100	2	lingual, very tenuous	DC well-developped, MC short	absent	absent	?	?	?	?	?	?	10	11	17.5	8.75	10	20	12.83	12.91
368	Sinraptor	Sinraptor lateral	Metriacanthosauridae	Metriacanthosauridae Lateral	IVPP V10600	mx7	dongi	This study	Shishugou Formation	Jiangjunmiao	Xinjiang	China	Oxfordian	Late Jurassic	Adult?	Right	mx7	Lateral	26.83	8.88	55.94	53.21	0.330973	2.08498	21.63	8.43	0.389736	-3	56.21	100	2	lingual, very tenuous	DC well-developped, MC short	absent	absent	?	?	?	?	?	?	11	12	13.75	11.66	11.5	16.875	12.25	13.34
369	Sinraptor	Sinraptor lateral	Metriacanthosauridae	Metriacanthosauridae Lateral	IVPP V10600	mx13	dongi	This study	Shishugou Formation	Jiangjunmiao	Xinjiang	China	Oxfordian	Late Jurassic	Adult?	Right	mx13	Lateral	14.76	6.68	21.62	20.15	0.452575	1.46477	12.46	5.52	0.443018	0	20.15	100	?	absent	DC short, MC ?	absent	absent	?	?	?	?	?	?	?	?	?	15	15	20	?	16.66
370	Sinraptor	Sinraptor lateral	Metriacanthosauridae	Metriacanthosauridae Lateral	IVPP V10600	dt8	dongi	This study	Shishugou Formation	Jiangjunmiao	Xinjiang	China	Oxfordian	Late Jurassic	Adult?	Right	dt8	Lateral	21.13	8.23	37.01	38.6	0.389494	1.75154	17.12	8.35	0.487734	0	38.6	100	3	labial, weak	DC well-developped, MC short	absent	absent	?	?	?	?	?	?	12	11	21.25	10	11.5	17.5	14.75	13
371	Sinraptor	Sinraptor lateral	Metriacanthosauridae	Metriacanthosauridae Lateral	IVPP V10600, black no plaster	Isolated	dongi	This study	Shishugou Formation	Jiangjunmiao	Xinjiang	China	Oxfordian	Late Jurassic	Adult?	/	Isolated	Lateral	19	9.6	40.55	40.05	0.505263	2.13421	16.49	9.03	0.547605	0	40.05	100	3	labial, very weak	DC well-developped, MC short	absent	absent	?	?	?	?	?	?	11.25	11.5	16.66	9.5	10.5	18	13.14	12.66
372	Sinraptor	Sinraptor lateral	Metriacanthosauridae	Metriacanthosauridae Lateral	IVPP V10600, black plaster	Isolated	dongi	This study	Shishugou Formation	Jiangjunmiao	Xinjiang	China	Oxfordian	Late Jurassic	Adult?	/	Isolated	Lateral	19.58	9.48	38.42	38.97	0.484168	1.96221	17.13	8.62	0.503211	0	38.97	100	2-3	labial, visible with light	DC well-developped, MC moderate	absent	absent	?	?	?	?	?	?	12	12.5	17.5	11	11.5	17	14	13.16
373	Sinraptor	Sinraptor mesial	Metriacanthosauridae	Metriacanthosauridae Mesial	IVPP V10600, light brown no pit	Isolated, mesial	dongi	This study	Shishugou Formation	Jiangjunmiao	Xinjiang	China	Oxfordian	Late Jurassic	Adult?	/	Isolated, mesial	Mesial	15.33	10.2	32.29	33.33	0.665362	2.10633	15.53	8.66	0.55763	0	33.33	100	0	absent	DC well-developped, MC absent	absent	absent	?	?	?	?	?	?	13	12.5	15	11	11	?	13.5	11
374	Sinraptor	Sinraptor mesial	Metriacanthosauridae	Metriacanthosauridae Mesial	IVPP V10600, light brown deep pit	Isolated, mesial	dongi	This study	Shishugou Formation	Jiangjunmiao	Xinjiang	China	Oxfordian	Late Jurassic	Adult?	/	Isolated, mesial	Mesial	17.08	11.36	38	37.18	0.665105	2.22482	15.43	9.69	0.627997	-2.8	39.98	100	0	absent	DC well-developped, MC short	absent	absent	?	?	?	?	?	?	12.5	12	17.5	11	11	16	14	12.66
375	Sinraptor	Sinraptor lateral	Metriacanthosauridae	Metriacanthosauridae Lateral	IVPP V10600, brown plaster	Isolated	dongi	This study	Shishugou Formation	Jiangjunmiao	Xinjiang	China	Oxfordian	Late Jurassic	Adult?	/	Isolated	Lateral	19.89	10.54	39.97	41.04	0.529915	2.00955	17.6	8.86	0.503409	-4.4	45.44	100	3	labial, weak	DC well-developped, MC moderate	absent	absent	?	?	?	?	?	?	11.25	11.5	18	11	11	16	13.58	12.66
376	Erectopus	Erectopus lateral	Metriacanthosauridae	Metriacanthosauridae Lateral	MNHN 2001-4	mx01	superbus	Hendrickx et al., 2015	Phosphate-bearing Beds of La Penthiève	Louppy-le-Château	Département de la Meuse	France	Lower Albian	'Middle Cretaceous'	Adult?	Left	mx01	Lateral	16.2	7.5	45	49	0.462963	2.77778	13.2	6.6	0.5	0	49	100	0	tenuous	DB, very short	absent	absent	?	?	?	?	?	?	14	15	22	12.5	14	18	17	14.8333
377	Erectopus	Erectopus lateral	Metriacanthosauridae	Metriacanthosauridae Lateral	MNHN 2001-4	mx02 (aveolus)	superbus	Hendrickx et al., 2015	Phosphate-bearing Beds of La Penthiève	Louppy-le-Château	Département de la Meuse	France	Lower Albian	'Middle Cretaceous'	Adult?	Left	mx02 (aveolus)	Lateral	18.7	7.4	48.3	55.3	0.395722	2.58289	14.5	6.9	0.475862	0	55.3	100	5	well visible	DB, very short	absent	absent	?	?	?	?	?	?	12.5	14	20	13.5	13	17	15.5	14.5
378	Erectopus	Erectopus lateral	Metriacanthosauridae	Metriacanthosauridae Lateral	MNHN 2001-4	mx03	superbus	Hendrickx et al., 2015	Phosphate-bearing Beds of La Penthiève	Louppy-le-Château	Département de la Meuse	France	Lower Albian	'Middle Cretaceous'	Adult?	Left	mx03	Lateral	21.5	10.3	49	56	0.47907	2.27907	16	7.5	0.46875	0	56	100	3	tenuous	DB, very short	absent	absent	?	?	?	?	?	?	12.5	13	14	12	12	14.375	13.1667	12.7917
379	Allosaurus	Allosaurus mesial	Allosauridae	Allosauridae Mesial	YPM 4944 (or 1333?)	pm02	fragilis	Smith et al., 2005	Morrison Formation	Emery County	Utah	U.S.	Kimmeridgian-Tithonian	Late Jurassic	?	Right	pm02	Mesial	12.46	6	28.65	25.49	0.481541	2.29936	?	?	?	?	?	?	?	?	?	?	?	?	?	?	?	83.79	0.22	11.8	10	9.8	11.9	10	11	10.5	11
380	Allosaurus	Allosaurus mesial	Allosauridae	Allosauridae Mesial	YPM 4944 (or 1333?)	pm03	fragilis	Smith et al., 2005	Morrison Formation	Emery County	Utah	U.S.	Kimmeridgian-Tithonian	Late Jurassic	?	Right	pm03	Mesial	12	11.07	20.69	25.59	0.9225	1.72417	?	?	?	?	?	?	?	?	?	?	?	?	?	?	?	78.27	0.09	11.8	10	13.7	11	10	12.8	11.8	11.3
381	Allosaurus	Allosaurus mesial	Allosauridae	Allosauridae Mesial	YPM 4944 (or 1333?)	pm05	fragilis	Smith et al., 2005	Morrison Formation	Emery County	Utah	U.S.	Kimmeridgian-Tithonian	Late Jurassic	?	Right	pm05	Mesial	13.04	9.28	26.98	30.39	0.711656	2.06902	?	?	?	?	?	?	?	?	?	?	?	?	?	?	?	81.18	0.15	12.6	10	15.7	12	11	17.7	12.8	13.6
382	Allosaurus	Allosaurus mesial	Allosauridae	Allosauridae Mesial	SDSM 25248	pm03	fragilis	Smith et al., 2005	Morrison Formation	Little Houston Quarry (Unit 2)	Wyoming	U.S.	Kimmeridgian-Tithonian	Late Jurassic	?	Left	pm03	Mesial	20.36	12.29	49.57	54	0.603635	2.43468	?	?	?	?	?	?	?	?	?	?	?	?	?	?	?	85.22	0.08	10	9	11	10	9	12	10	10.3
383	Allosaurus	Allosaurus mesial	Allosauridae	Allosauridae Mesial	SDSM 25248	pm05	fragilis	Smith et al., 2005	Morrison Formation	Little Houston Quarry (Unit 2)	Wyoming	U.S.	Kimmeridgian-Tithonian	Late Jurassic	?	Left	pm05	Mesial	16.01	8.23	34.05	39.74	0.514054	2.1268	?	?	?	?	?	?	?	?	?	?	?	?	?	?	?	82.76	0.11	13	16	24	14	12.5	15	17.7	13.8
384	Allosaurus	Allosaurus mesial	Allosauridae	Allosauridae Mesial	UMNH VP 6499	pmx2	fragilis	Young et al., 2019 (C.H. pers. measurements)	Morrison Formation	Cleveland-Lloyd Dinosaur Quarry, Emery Co.	Utah	U.S.	Kimmeridgian-Tithonian	Late Jurassic	Adult	Left	pmx2	Mesial	16.75	15.89	38.35	39.57	0.948657	2.28955	13.39	11.7	0.873786	0	39.57	100	2	very tenous on labial side	MC short, DC medium on lingual	absent	absent	?	?	?	?	?	?	8.75	9.5	11.66	9.5	9.5	15	9.97	11.33
385	Allosaurus	Allosaurus mesial	Allosauridae	Allosauridae Mesial	UMNH VP 6499	pmx3	fragilis	Young et al., 2019 (C.H. pers. measurements)	Morrison Formation	Cleveland-Lloyd Dinosaur Quarry, Emery Co.	Utah	U.S.	Kimmeridgian-Tithonian	Late Jurassic	Adult	Left	pmx3	Mesial	16.74	14.27	35.93	38.68	0.852449	2.14636	14.6	10.48	0.717808	0	38.68	100	2	very tenous on labial side	DC short on labial, MC absent	absent	absent	?	?	?	?	?	?	?	8.33	14.5	?	10	11	11.45	10.5
386	Allosaurus	Allosaurus mesial	Allosauridae	Allosauridae Mesial	UMNH VP 6499	pmx4	fragilis	Young et al., 2019 (C.H. pers. measurements)	Morrison Formation	Cleveland-Lloyd Dinosaur Quarry, Emery Co.	Utah	U.S.	Kimmeridgian-Tithonian	Late Jurassic	Adult	Left	pmx4	Mesial	16.96	15.28	43.95	39.1	0.900943	2.59139	16.43	11.76	0.715764	0	39.1	100	3	very tenous on labial side	MC absent, DC medium to well-developped on lingual	absent	absent	?	?	?	?	?	?	?	9	13.75	?	10	10.5	11.37	10.25
387	Allosaurus	Allosaurus mesial	Allosauridae	Allosauridae Mesial	UMNH VP 20687	pmx4	fragilis	Young et al., 2019 (C.H. pers. measurements)	Morrison Formation	Cleveland-Lloyd Dinosaur Quarry, Emery Co.	Utah	U.S.	Kimmeridgian-Tithonian	Late Jurassic	Adult	Left	pmx4	Mesial	16.4	14.76	39.52	39.29	0.9	2.40976	15.1	11.75	0.778146	0	39.29	100	2	well-visible on the root in lingual	DC medium on lingual side	absent	absent	?	?	?	?	?	?	?	11.25	12	10.62	10.62	13.33	11.625	11.52
388	Allosaurus	Allosaurus mesial	Allosauridae	Allosauridae Mesial	UMNH VP 10393 (juvenile)	pmx4	fragilis	Young et al., 2019 (C.H. pers. measurements)	Morrison Formation	Cleveland-Lloyd Dinosaur Quarry, Emery Co.	Utah	U.S.	Kimmeridgian-Tithonian	Late Jurassic	Immature	Right	pmx4	Mesial	10.47	8.88	27.23	28.67	0.848138	2.60076	9.34	7.05	0.754818	0	28.67	100	0	absent	DC short on lingual, medium to well-developped on labial	absent	absent	?	?	?	?	?	?	13	10.83	13.75	12.5	10.5	13.75	13	12.5
389	Allosaurus	Allosaurus lateral	Allosauridae	Allosauridae Lateral	UMNH VP 9369	dt6	fragilis	Young et al., 2019 (C.H. pers. measurements)	Morrison Formation	Cleveland-Lloyd Dinosaur Quarry, Emery Co.	Utah	U.S.	Kimmeridgian-Tithonian	Late Jurassic	Immature	Right	dt6	Lateral	11.52	8.42	25.69	28.54	0.730903	2.23003	10.4	5.98	0.575	?	?	?	2	visible with light on labial side	DC short to medium, M absent	absent	absent	?	?	?	?	?	?	?	16.25	?	13.75	13.75	17.5	16.25	15
390	Allosaurus	Allosaurus lateral	Allosauridae	Allosauridae Mesial	UMNH VP 6475 (juvenile)	dt1	fragilis	Young et al., 2019 (C.H. pers. measurements)	Morrison Formation	Cleveland-Lloyd Dinosaur Quarry, Emery Co.	Utah	U.S.	Kimmeridgian-Tithonian	Late Jurassic	Immature	Left	dt1	Mesial	5.47	6.39	12.27	11.9	1.16819	2.24314	5.36	4.3	0.802239	0	11.9	100	0	absent	DC short	absent	absent	?	?	?	?	?	?	?	12.5	?	?	13	15.5	12.5	14.25
391	Allosaurus	Allosaurus lateral	Allosauridae	Allosauridae Lateral	UMNH VP 6475 (juvenile)	dt4	fragilis	Young et al., 2019 (C.H. pers. measurements)	Morrison Formation	Cleveland-Lloyd Dinosaur Quarry, Emery Co.	Utah	U.S.	Kimmeridgian-Tithonian	Late Jurassic	Immature	Left	dt4	Lateral	7.74	6.07	19.1	19.03	0.784238	2.4677	6.91	4.48	0.648336	0	19.03	100	2 or 3	very tenous on labial side	DC short	absent	absent	?	?	?	?	?	?	17.5	15	?	14.5	13.5	19.16	16.25	15.72
392	Allosaurus	Allosaurus lateral	Allosauridae	Allosauridae Lateral	UMNH VP 9351	dt2	fragilis	Young et al., 2019 (C.H. pers. measurements)	Morrison Formation	Cleveland-Lloyd Dinosaur Quarry, Emery Co.	Utah	U.S.	Kimmeridgian-Tithonian	Late Jurassic	Subadult?	Left	dt2	Lateral	12.75	11.8	23.25	25.22	0.92549	1.82353	10.38	7.56	0.728324	0	25.22	100	?	?	?	absent	absent	?	?	?	?	?	?	?	11	?	?	10	11	11	10.5
393	Allosaurus	Allosaurus lateral	Allosauridae	Allosauridae Lateral	UMNH VP 9351	dt4	fragilis	Young et al., 2019 (C.H. pers. measurements)	Morrison Formation	Cleveland-Lloyd Dinosaur Quarry, Emery Co.	Utah	U.S.	Kimmeridgian-Tithonian	Late Jurassic	Subadult?	Left	dt4	Lateral	14.13	13.29	30.83	37.68	0.940552	2.18188	12.61	8.3	0.658208	0	37.68	100	?	?	?	absent	absent	?	?	?	?	?	?	12.5	11.25	20	11.25	10	?	14.58	10.625
394	Allosaurus	Allosaurus lateral	Allosauridae	Allosauridae Lateral	UMNH VP 9351	dt6	fragilis	Young et al., 2019 (C.H. pers. measurements)	Morrison Formation	Cleveland-Lloyd Dinosaur Quarry, Emery Co.	Utah	U.S.	Kimmeridgian-Tithonian	Late Jurassic	Subadult?	Left	dt6	Lateral	14.68	11.23	29.2	32.24	0.764986	1.9891	13.33	8.65	0.648912	0	32.24	100	?	?	?	absent	absent	?	?	?	?	?	?	12.5	10.62	17.5	12.5	11.66	18	13.54	14.05
395	Allosaurus	Allosaurus lateral	Allosauridae	Allosauridae Lateral	UMNH VP 9211	mx4	fragilis	Young et al., 2019 (C.H. pers. measurements)	Morrison Formation	Cleveland-Lloyd Dinosaur Quarry, Emery Co.	Utah	U.S.	Kimmeridgian-Tithonian	Late Jurassic	Immature	Left	mx4	Lateral	14.94	7.17	31.47	36.57	0.47992	2.10643	13.14	6.21	0.472603	0	36.57	100	?	?	?	absent	absent	?	?	?	?	?	?	12.9	12.5	?	?	13.125	?	12.7	13.125
396	Allosaurus	Allosaurus lateral	Allosauridae	Allosauridae Lateral	UMNH VP 9211	mx6	fragilis	Young et al., 2019 (C.H. pers. measurements)	Morrison Formation	Cleveland-Lloyd Dinosaur Quarry, Emery Co.	Utah	U.S.	Kimmeridgian-Tithonian	Late Jurassic	Immature	Left	mx6	Lateral	14.99	6.54	29.27	33.5	0.436291	1.95264	13.89	7.43	0.534917	0	33.5	100	2/3mm	very tenuous on lingual	DC medium on labial side	absent	absent	?	?	?	?	?	?	?	?	?	16.66	?	?	?	16.66
397	Allosaurus	Allosaurus lateral	Allosauridae	Allosauridae Lateral	UMNH VP 9229	mx7	fragilis	Young et al., 2019 (C.H. pers. measurements)	Morrison Formation	Cleveland-Lloyd Dinosaur Quarry, Emery Co.	Utah	U.S.	Kimmeridgian-Tithonian	Late Jurassic	Adult	Right	mx7	Lateral	22.59	12.05	47.49	46.36	0.533422	2.10226	18.06	10.01	0.554264	0	46.36	100	3	very well visible on labial, tenuous on lingual	D short	absent	absent	?	?	?	?	?	?	12.5	11.5	?	12.5	11.5	19	12	14.33
398	Allosaurus	Allosaurus lateral	Allosauridae	Allosauridae Lateral	UMNH VP 9168	mx6	fragilis	Young et al., 2019 (C.H. pers. measurements)	Morrison Formation	Cleveland-Lloyd Dinosaur Quarry, Emery Co.	Utah	U.S.	Kimmeridgian-Tithonian	Late Jurassic	Adult	Left	mx6	Lateral	20.57	13.93	47.29	50.15	0.6772	2.29898	19.29	10.42	0.540176	0	50.15	100	3	very well visible on labial, marginal undulations on DC labial,	absent	absent	absent	?	?	?	?	?	?	12.5	13.33	16.25	13	12.5	18	14.02	14.5
399	Allosaurus	Allosaurus lateral	Allosauridae	Allosauridae Lateral	UMNH VP 9218	mx1	fragilis	Young et al., 2019 (C.H. pers. measurements)	Morrison Formation	Cleveland-Lloyd Dinosaur Quarry, Emery Co.	Utah	U.S.	Kimmeridgian-Tithonian	Late Jurassic	Adult	Left	mx1	Lateral	18.67	13.44	42.12	44.07	0.719871	2.25603	15.93	10.67	0.669805	0	44.07	100	?	?	D medium	absent	absent	?	?	?	?	?	?	13.125	10	?	12	10.5	16	11.56	12.83
400	Allosaurus	Allosaurus mesial	Allosauridae	Allosauridae Mesial	UMNH VP 5837	Isolated	fragilis	Young et al., 2019 (C.H. pers. measurements)	Morrison Formation	Cleveland-Lloyd Dinosaur Quarry, Emery Co.	Utah	U.S.	Kimmeridgian-Tithonian	Late Jurassic	?	Isolated	Mesial	Mesial	14.88	17.3	33.97	34.95	1.16263	2.28293	12.27	11.51	0.93806	?	?	?	3	marginal undualtions well-visible close to MC on labial	absent	absent	absent	?	?	?	?	?	?	11.66	10	13	10	9	?	11.55	9.5
401	Allosaurus	Allosaurus mesial	Allosauridae	Allosauridae Mesial	UMNH VP 7438	Isolated	fragilis	Young et al., 2019 (C.H. pers. measurements)	Morrison Formation	Cleveland-Lloyd Dinosaur Quarry, Emery Co.	Utah	U.S.	Kimmeridgian-Tithonian	Late Jurassic	?	Isolated	Mesial	Mesial	17.92	15.38	40.2	41.09	0.858259	2.2433	15.91	10.51	0.660591	0	41.09	100	2	very tenous close to DC on lingual	D short to medium	absent	absent	?	?	?	?	?	?	8.75	9.16	11.66	10.625	10	15.83	9.85	12.15
402	Allosaurus	Allosaurus mesial	Allosauridae	Allosauridae Mesial	UMNH VP 6145	Isolated	fragilis	Young et al., 2019 (C.H. pers. measurements)	Morrison Formation	Cleveland-Lloyd Dinosaur Quarry, Emery Co.	Utah	U.S.	Kimmeridgian-Tithonian	Late Jurassic	?	Isolated	Mesial	Mesial	10.93	12.56	25.25	27.09	1.14913	2.31016	9.65	9.06	0.93886	0	27.09	100	3	tenuous on labial close to DC	D short	absent	absent	?	?	?	?	?	?	10.83	10	12.5	10.62	10.25	15.83	11.11	12.23
403	Allosaurus	Allosaurus mesial	Allosauridae	Allosauridae Mesial	UMNH VP 6239	Isolated	fragilis	Young et al., 2019 (C.H. pers. measurements)	Morrison Formation	Cleveland-Lloyd Dinosaur Quarry, Emery Co.	Utah	U.S.	Kimmeridgian-Tithonian	Late Jurassic	?	Isolated	Mesial	Mesial	17.64	14.49	36.54	39.45	0.821429	2.07143	15.6	10.89	0.698077	0	39.45	100	3	very tenuous on lingual	?	absent	absent	?	?	?	?	?	?	10.62	8.75	13.33	11.66	10	?	10.82	10.83
404	Allosaurus	Allosaurus mesial	Allosauridae	Allosauridae Mesial	UMNH VP 5812	Isolated	fragilis	Young et al., 2019 (C.H. pers. measurements)	Morrison Formation	Cleveland-Lloyd Dinosaur Quarry, Emery Co.	Utah	U.S.	Kimmeridgian-Tithonian	Late Jurassic	?	Isolated	Mesiolateral	Mesial	10.67	9.53	24.03	26.51	0.893158	2.25211	9.49	6.33	0.667018	0	26.51	100	2/3mm	tenuous on labial	D short	absent	absent	?	?	?	?	?	?	15	11	16	13	12	14.375	14	13.125
405	Allosaurus	Allosaurus lateral	Allosauridae	Allosauridae Lateral	UMNH VP 6189	Isolated	fragilis	Young et al., 2019 (C.H. pers. measurements)	Morrison Formation	Cleveland-Lloyd Dinosaur Quarry, Emery Co.	Utah	U.S.	Kimmeridgian-Tithonian	Late Jurassic	?	Isolated	Lateral	Lateral	23.33	10.77	45.44	44.71	0.461637	1.94771	19.06	10.03	0.526233	0	44.71	100	3	marginal, visible on lingual, DBC	D medium	absent	absent	?	?	?	?	?	?	11.25	13.75	19.16	12	11	19	14.72	14
406	Allosaurus	Allosaurus lateral	Allosauridae	Allosauridae Lateral	UMNH VP 5841	Isolated	fragilis	Young et al., 2019 (C.H. pers. measurements)	Morrison Formation	Cleveland-Lloyd Dinosaur Quarry, Emery Co.	Utah	U.S.	Kimmeridgian-Tithonian	Late Jurassic	?	Isolated	Lateral	Lateral	16.74	8.25	29.24	35.61	0.492832	1.74671	15.29	8.06	0.527142	?	?	?	2 on crown, 3 on root	very well visible on root, numerous on root and base of crown	D medium	absent	absent	?	?	?	?	?	?	16.66	17.5	22.5 (MBC)	15	12	20	15.41	15.66
407	Allosaurus	Allosaurus lateral	Allosauridae	Allosauridae Lateral	UMNH VP 5785	Isolated	fragilis	Young et al., 2019 (C.H. pers. measurements)	Morrison Formation	Cleveland-Lloyd Dinosaur Quarry, Emery Co.	Utah	U.S.	Kimmeridgian-Tithonian	Late Jurassic	?	Isolated	Lateral	Lateral	15.63	10.09	35.91	38.86	0.645553	2.2975	13.67	8.51	0.622531	0	38.86	100	2 to 4	visible on labial, close to D on lingual	D medium	absent	absent	?	?	?	?	?	?	?	13.75	20	11.25	12	20	16.875	14.41
408	Allosaurus	Allosaurus lateral	Allosauridae	Allosauridae Lateral	UMNH VP 6101	Isolated	fragilis	Young et al., 2019 (C.H. pers. measurements)	Morrison Formation	Cleveland-Lloyd Dinosaur Quarry, Emery Co.	Utah	U.S.	Kimmeridgian-Tithonian	Late Jurassic	?	Isolated	Lateral	Lateral	20.28	13.4	41.08	46.62	0.66075	2.29882	17.6	9.4	0.534091	0	46.62	100	3	tenuous on labial side, very tenuous on lingual	D short to medium	absent	absent	?	?	?	?	?	?	12.5	?	21.66	12.5	12.5	16.25	17.08	13.75
409	Allosaurus	Allosaurus lateral	Allosauridae	Allosauridae Lateral	UMNH VP 6113	Isolated	fragilis	Young et al., 2019 (C.H. pers. measurements)	Morrison Formation	Cleveland-Lloyd Dinosaur Quarry, Emery Co.	Utah	U.S.	Kimmeridgian-Tithonian	Late Jurassic	?	Isolated	Lateral	Lateral	21.71	14.01	47.12	51.21	0.645325	2.17043	20.51	11.05	0.538762	0	51.21	100	3	marginal to DC on lingual	?	absent	absent	?	?	?	?	?	?	?	?	?	10	13.5	22.5	?	22.5
410	Allosaurus	Allosaurus lateral	Allosauridae	Allosauridae Lateral	UMNH VP 6177	Isolated	fragilis	Young et al., 2019 (C.H. pers. measurements)	Morrison Formation	Cleveland-Lloyd Dinosaur Quarry, Emery Co.	Utah	U.S.	Kimmeridgian-Tithonian	Late Jurassic	?	Isolated	Lateral	Lateral	16.24	8.01	32.22	35.8	0.493227	1.98399	14.55	6.79	0.466667	0	35.8	100	2/3mm labial, 3/5mm lingual	very tenuous on labial side, tenuous on lingual	D medium to well developped on lingual	absent	absent	?	?	?	?	?	?	12	14.5	27.5	?	13	22.5	18	17.75
411	Allosaurus	Allosaurus lateral	Allosauridae	Allosauridae Lateral	UMNH VP 7436	Isolated	fragilis	Young et al., 2019 (C.H. pers. measurements)	Morrison Formation	Cleveland-Lloyd Dinosaur Quarry, Emery Co.	Utah	U.S.	Kimmeridgian-Tithonian	Late Jurassic	?	Isolated	Lateral	Lateral	20.64	12.89	45.06	46.08	0.624516	2.18314	18.46	9.6	0.520043	0	46.08	100	2	marginal on labial close to DBC	?	absent	absent	?	?	?	?	?	?	12	12.5	?	11.5	12.5	13.33	12.25	12.44
412	Allosaurus	Allosaurus lateral	Allosauridae	Allosauridae Lateral	UMNH VP 6105	Isolated	fragilis	Young et al., 2019 (C.H. pers. measurements)	Morrison Formation	Cleveland-Lloyd Dinosaur Quarry, Emery Co.	Utah	U.S.	Kimmeridgian-Tithonian	Late Jurassic	?	Isolated	Lateral	Lateral	22.87	15.86	49.87	55.28	0.693485	2.18059	20.35	11.17	0.548894	0	55.28	100	2	visible with light on labial, abundant	D medium	absent	absent	?	?	?	?	?	?	9.375	10.5	14.375	12.5	10.5	22.5	11.41	15.16
413	Allosaurus	Allosaurus lateral	Allosauridae	Allosauridae Lateral	UMNH VP 9211	mx04	fragilis	Smith et al., 2005	Morrison Formation	Cleveland-Lloyd Dinosaur Quarry, Emery Co.	Utah	U.S.	Kimmeridgian-Tithonian	Late Jurassic	Immature	Left	mx04	Lateral	14.99	7.33	30.02	37.51	0.488993	2.00267	?	?	?	?	?	?	?	?	?	?	?	?	?	?	?	81.51	0.08	14	11.5	15	12	10	15	13.5	12.3
414	Allosaurus	Allosaurus lateral	Allosauridae	Allosauridae Lateral	UMNH VP 9211	mx06	fragilis	Smith et al., 2005	Morrison Formation	Cleveland-Lloyd Dinosaur Quarry, Emery Co.	Utah	U.S.	Kimmeridgian-Tithonian	Late Jurassic	Immature	Left	mx06	Lateral	15.22	7.04	33.48	37.9	0.462549	2.19974	?	?	?	?	?	?	?	?	?	?	?	?	?	?	?	82.77	0.13	15	11	15	15	11	19	13.7	15
415	Allosaurus	Allosaurus lateral	Allosauridae	Allosauridae Lateral	UMNH VP 9275	mx07	fragilis	Smith et al., 2005	Morrison Formation	Cleveland-Lloyd Dinosaur Quarry, Emery Co.	Utah	U.S.	Kimmeridgian-Tithonian	Late Jurassic	?	Right	mx07	Lateral	12.08	7.45	25.43	30.53	0.616722	2.10513	?	?	?	?	?	?	?	?	?	?	?	?	?	?	?	80.09	0.18	18	14	21	17	17.5	18	17.7	17.5
416	Allosaurus	Allosaurus lateral	Allosauridae	Allosauridae Lateral	UMNH VP 9273	mx07	fragilis	Smith et al., 2005	Morrison Formation	Cleveland-Lloyd Dinosaur Quarry, Emery Co.	Utah	U.S.	Kimmeridgian-Tithonian	Late Jurassic	Immature	Right	mx07	Lateral	14.06	7.59	28.5	32.12	0.539829	2.02703	?	?	?	?	?	?	?	?	?	?	?	?	?	?	?	81.69	0.14	15	13.5	20	16	14	18.5	16.2	16.2
417	Allosaurus	Allosaurus lateral	Allosauridae	Allosauridae Lateral	UMNH VP 9273	mx06	fragilis	Smith et al., 2005	Morrison Formation	Cleveland-Lloyd Dinosaur Quarry, Emery Co.	Utah	U.S.	Kimmeridgian-Tithonian	Late Jurassic	Immature	Right	mx06	Lateral	14.78	7.21	25.52	29.82	0.487821	1.72666	?	?	?	?	?	?	?	?	?	?	?	?	?	?	?	80.8	0.1	16	12.5	22	18	15	18	16.8	17
418	Allosaurus	Allosaurus lateral	Allosauridae	Allosauridae Lateral	UMNH VP 9218	mx01	fragilis	Smith et al., 2005	Morrison Formation	Cleveland-Lloyd Dinosaur Quarry, Emery Co.	Utah	U.S.	Kimmeridgian-Tithonian	Late Jurassic	Adult	Left	mx01	Lateral	17.32	13.03	38.25	42.19	0.752309	2.20843	?	?	?	?	?	?	?	?	?	?	?	?	?	?	?	83.83	0.12	11	9.5	20	12	11.5	13	13.5	12.2
419	Allosaurus	Allosaurus lateral	Allosauridae	Allosauridae Lateral	UMNH VP 9369	d06	fragilis	Smith et al., 2005	Morrison Formation	Cleveland-Lloyd Dinosaur Quarry, Emery Co.	Utah	U.S.	Kimmeridgian-Tithonian	Late Jurassic	Immature	Right	d06	Lateral	11.77	8.26	25.8	29.1	0.701784	2.19201	?	?	?	?	?	?	?	?	?	?	?	?	?	?	?	80.64	0.19	16	18	20	15	13.5	18	18	15.5
420	Allosaurus	Allosaurus lateral	Allosauridae	Allosauridae Lateral	UMNH VP 9365	d02	fragilis	Smith et al., 2005	Morrison Formation	Cleveland-Lloyd Dinosaur Quarry, Emery Co.	Utah	U.S.	Kimmeridgian-Tithonian	Late Jurassic	Immature	Right	d02	Mesial	10.63	9.77	24.62	27.61	0.919097	2.31609	?	?	?	?	?	?	?	?	?	?	?	?	?	?	?	80.13	0.19	12	10	15	12	11	13.7	12.3	12.2
421	Allosaurus	Allosaurus lateral	Allosauridae	Allosauridae Lateral	UMNH VP 1251	pm05	fragilis	Smith et al., 2005	Morrison Formation	Cleveland-Lloyd Dinosaur Quarry, Emery Co.	Utah	U.S.	Kimmeridgian-Tithonian	Late Jurassic	Adult	Right	pm05	Mesial	16.1	13.82	40.85	40.61	0.858385	2.53727	?	?	?	?	?	?	?	?	?	?	?	?	?	?	?	84.86	0.19	11	10	14	12	11	17.5	11.7	13.5
422	Allosaurus	Allosaurus lateral	Allosauridae	Allosauridae Lateral	USNM 8335	mx1	fragilis	Hendrickx et al., 2015	Morrison Formation	Canyon City, Garden Park, Quarry I	Colorado	U.S.	Kimmeridgian-Tithonian	Late Jurassic	Adult	Right	mx1	Lateral	16.7	13.4	34.1	45	0.802395	2.04192	15.3	8.9	0.581699	0	45	100	0	?	?	absent	absent	?	?	?	?	?	?	11.66	12	?	11.66	11	?	11.83	11.33
423	Allosaurus	Allosaurus lateral	Allosauridae	Allosauridae Lateral	USNM 8335	mx10	fragilis	Hendrickx et al., 2015	Morrison Formation	Canyon City, Garden Park, Quarry I	Colorado	U.S.	Kimmeridgian-Tithonian	Late Jurassic	Adult	Right	mx10	Lateral	18.7	6.9	31.9	35	0.368984	1.70588	14.5	7.4	0.510345	0	35	100	0	?	?	absent	absent	?	?	?	?	?	?	13.5	13	?	11.25	13.33	17	13.25	13.86
424	Allosaurus	Allosaurus lateral	Allosauridae	Allosauridae Mesial	CM 11844	right pmx	fragilis	Hendrickx et al., 2015	Morrison Formation	Carnegie Museum Quarry - Uintah Co.	Utah	U.S.	Kimmeridgian-Tithonian	Late Jurassic	Adult	/	right pmx	Mesial	17.9	17.3	39.5	39.2	0.96648	2.2067	14.2	11.2	0.788732	0	39.2	100	0	?	?	absent	absent	2.4	3.7	4	?	?	?	?	10	12	9	12	19	11	11
425	Allosaurus	Allosaurus lateral	Allosauridae	Allosauridae Lateral	CM 11844	Isolated	fragilis	Hendrickx et al., 2015	Morrison Formation	Carnegie Museum Quarry - Uintah Co.	Utah	U.S.	Kimmeridgian-Tithonian	Late Jurassic	Adult	/	Isolated	Lateral	18.2	14.4	50.8	56.2	0.791209	2.79121	18	10.7	0.594444	0	56.2	100	4	?	?	absent	absent	3*	3,6*	3.4	?	?	?	?	?	?	?	?	?	?	?
426	Allosaurus	Allosaurus mesial	Allosauridae	Allosauridae Mesial	CM 21703	pmx2	fragilis	Hendrickx et al., 2015	Morrison Formation	Carnegie Museum Quarry - Uintah Co.	Utah	U.S.	Kimmeridgian-Tithonian	Late Jurassic	Adult	Left	pm02	Mesial	12.6	14.5	33.8	34.8	1.15079	2.68254	12.6	9.8	0.777778	0	34.8	100	0	?	?	absent	absent	?	?	?	?	?	?	?	10	12.5	?	10	11	11.25	10.5
427	Allosaurus	Allosaurus mesial	Allosauridae	Allosauridae Mesial	CM 21703	pmx3	fragilis	Hendrickx et al., 2015	Morrison Formation	Carnegie Museum Quarry - Uintah Co.	Utah	U.S.	Kimmeridgian-Tithonian	Late Jurassic	Adult	Left	pm03	Mesial	15.6	12.6	33.3	37	0.807692	2.13462	11.4	9.4	0.824561	0	37	100	0	?	?	absent	absent	?	?	?	?	?	?	?	?	?	?	?	?	?	?
428	Allosaurus	Allosaurus mesial	Allosauridae	Allosauridae Mesial	CM 21703	pmx4	fragilis	Hendrickx et al., 2015	Morrison Formation	Carnegie Museum Quarry - Uintah Co.	Utah	U.S.	Kimmeridgian-Tithonian	Late Jurassic	Adult	Left	pm04	Mesial	15.5	12.8	34.8	35.1	0.825806	2.24516	12.4	8.8	0.709677	0	35.1	100	0	?	?	absent	absent	?	?	?	?	?	?	?	10.5	?	?	11	13	10.5	12
429	Allosaurus	Allosaurus mesial	Allosauridae	Allosauridae Mesial	CM 21703	pm02	fragilis	Smith et al., 2005	Morrison Formation	Carnegie Museum Quarry - Uintah Co.	Utah	U.S.	Kimmeridgian-Tithonian	Late Jurassic	Adult	Left	pm02	Mesial	14.05	12.52	34.31	34.82	0.891103	2.44199	?	?	?	?	?	?	?	?	?	?	?	?	?	?	?	83.69	0.16	11	10	11	9	10	11	10.7	10
430	Allosaurus	Allosaurus mesial	Allosauridae	Allosauridae Mesial	CM 21703	pm03	fragilis	Smith et al., 2005	Morrison Formation	Carnegie Museum Quarry - Uintah Co.	Utah	U.S.	Kimmeridgian-Tithonian	Late Jurassic	Adult	Left	pm03	Mesial	12.79	10.5	34.2	36.53	0.820954	2.67396	?	?	?	?	?	?	?	?	?	?	?	?	?	?	?	83.13	0.17	11	9.5	11.5	9.5	10	10	10.7	9.8
431	Allosaurus	Allosaurus mesial	Allosauridae	Allosauridae Mesial	CM 21703	pm04	fragilis	Smith et al., 2005	Morrison Formation	Carnegie Museum Quarry - Uintah Co.	Utah	U.S.	Kimmeridgian-Tithonian	Late Jurassic	Adult	Left	pm04	Mesial	13.73	10.65	33.19	35.51	0.775674	2.41733	?	?	?	?	?	?	?	?	?	?	?	?	?	?	?	83.01	0.15	11.5	10.5	12.7	9.5	11	11	11.6	10.5
432	Allosaurus	Allosaurus mesial	Allosauridae	Allosauridae Mesial	AMNH851	pmx3	fragilis	Hendrickx et al., 2015	Morrison Formation	Bone Cabin Quarry	Wyoming	U.S.	Kimmeridgian-Tithonian	Late Jurassic	Adult	Right	pmx03	Mesial	17.95	17.72	36.4	38.02	0.987187	2.02786	13.46	12.21	0.907132	5	33.02	?	2/5mm	labial well visible	MA short	absent	absent	?	?	?	?	?	?	10	10	9.5	10	9.5	13.5	9.83	11
433	Allosaurus	Allosaurus lateral	Allosauridae	Allosauridae Lateral	AMNH851	mx09	fragilis	Hendrickx et al., 2015	Morrison Formation	Bone Cabin Quarry	Wyoming	U.S.	Kimmeridgian-Tithonian	Late Jurassic	Adult	Right	mx09	Lateral	22.2	9.74	43.67	48.75	0.438739	1.96712	19.58	9.67	0.493871	?	?	?	3/6mm	well visible on both sides	D short	absent	absent	?	?	?	?	?	?	10	10	?	10	11	14	10	11.66
434	Allosaurus	Allosaurus mesial	Allosauridae	Allosauridae Mesial	LACM 46030	pm01	fragilis	Smith et al., 2005	Morrison Formation	Emery County	Utah	U.S.	Kimmeridgian-Tithonian	Late Jurassic	?	Comp/	pm01	Mesial	16.1	15.3	33.9	36.69	0.950311	2.10559	?	?	?	?	?	?	?	?	?	?	?	?	?	?	?	83.22	0.04	8	9.5	13	9.5	10	/	10.2	9.75
435	Allosaurus	Allosaurus mesial	Allosauridae	Allosauridae Mesial	LACM 46030	pm02	fragilis	Smith et al., 2005	Morrison Formation	Emery County	Utah	U.S.	Kimmeridgian-Tithonian	Late Jurassic	?	Comp/	pm02	Mesial	16	14.6	33.89	35.99	0.9125	2.11813	?	?	?	?	?	?	?	?	?	?	?	?	?	?	?	83.33	0.12	8	9.3	12.5	9.8	10.3	12.8	9.9	10.9
436	Allosaurus	Allosaurus mesial	Allosauridae	Allosauridae Mesial	LACM 46030	pm03	fragilis	Smith et al., 2005	Morrison Formation	Emery County	Utah	U.S.	Kimmeridgian-Tithonian	Late Jurassic	?	Comp/	pm03	Mesial	15.5	14.9	36.81	38.3	0.96	2.37	?	?	?	?	?	?	?	?	?	?	?	?	?	?	?	83.93	0.134	9	9.5	13	10.8	10	13.3	10.5	11.3
437	Allosaurus	Allosaurus mesial	Allosauridae	Allosauridae Mesial	LACM 46030	pm04	fragilis	Smith et al., 2005	Morrison Formation	Emery County	Utah	U.S.	Kimmeridgian-Tithonian	Late Jurassic	?	Comp/	pm04	Mesial	16.3	13.5	37.69	38.98	0.828221	2.31227	?	?	?	?	?	?	?	?	?	?	?	?	?	?	?	84.13	0.13	9.3	9.8	12.5	10.3	10	13	10.5	11.1
438	Allosaurus	Allosaurus mesial	Allosauridae	Allosauridae Mesial	LACM 46030	pm05	fragilis	Smith et al., 2005	Morrison Formation	Emery County	Utah	U.S.	Kimmeridgian-Tithonian	Late Jurassic	?	Left	pm05	Mesial	17.5	12.8	38.85	40.26	0.731429	2.22	?	?	?	?	?	?	?	?	?	?	?	?	?	?	?	84.31	0.12	11	11	12	11.5	11	13.5	11.3	12
439	Megaraptor	Megaraptor lateral	Neovenatoridae	Neovenatoridae Lateral	MUCPv 595	mx5	namunhuaiquii	Hendrickx et al., 2015	Portezuelo Formation	Futalognko site, Lago Bareales	Neuquén Province	Argentina	Turonian	Late Cretaceous	Juvenile	Left	mx5	Lateral	8.1	3.76	14.23	16.45	0.464198	1.75679	6.76	2.9	0.428994	/	/	/	0	absent	absent	absent	absent	?	?	?	?	?	?	/	/	/	?	17.5	?	?	17.5
440	Megaraptor	Megaraptor lateral	Neovenatoridae	Neovenatoridae Lateral	MUCPv 595	mx2	namunhuaiquii	Hendrickx et al., 2015	Portezuelo Formation	Futalognko site, Lago Bareales	Neuquén Province	Argentina	Turonian	Late Cretaceous	Juvenile	Right	mx2	Lateral	6.24	3.16	11.42	11.28	0.50641	1.83013	5.71	3.31	0.579685	/	/	/	3?/2 mm	tenuous on labial side	absent	absent	absent	?	?	?	?	?	?	/	/	/	?	?	?	/	?
441	Megaraptor	Megaraptor lateral	Neovenatoridae	Neovenatoridae Lateral	MUCPv 595	mx5	namunhuaiquii	Hendrickx et al., 2015	Portezuelo Formation	Futalognko site, Lago Bareales	Neuquén Province	Argentina	Turonian	Late Cretaceous	Juvenile	Right	mx5	Lateral	8.06	3.87	13.72	15.27	0.480149	1.70223	6.35	3.4	0.535433	/	/	/	2?/1 mm	tenuous on labial side	absent	absent	absent	?	?	?	?	?	?	/	/	/	17.5	15	?	/	16.25
442	Megaraptor	Megaraptor lateral	Neovenatoridae	Neovenatoridae Lateral	MUCPv 595	mx7	namunhuaiquii	Hendrickx et al., 2015	Portezuelo Formation	Futalognko site, Lago Bareales	Neuquén Province	Argentina	Turonian	Late Cretaceous	Juvenile	Right	mx7	Lateral	7.35	3.63	12.4	13.73	0.493878	1.68707	6.39	3.2	0.500782	/	/	/	2?/3 mm	tenuous on labial side	absent	absent	absent	?	?	?	?	?	?	/	/	/	17.5	17.5	20	/	18.33
443	Megaraptor	Megaraptor lateral	Neovenatoridae	Neovenatoridae Lateral	MUCPv 595	mx9	namunhuaiquii	Hendrickx et al., 2015	Portezuelo Formation	Futalognko site, Lago Bareales	Neuquén Province	Argentina	Turonian	Late Cretaceous	Juvenile	Right	mx9	Lateral	7.73	3.68	10.57	13.66	0.476067	1.3674	5.94	3.39	0.570707	/	/	/	2?/1 mm	tenuous on lingual side	absent	absent	absent	?	?	?	?	?	?	/	/	/	?	?	?	/	?
444	Megaraptor	Megaraptor lateral	Neovenatoridae	Neovenatoridae Lateral	MUCPv 595	mx10	namunhuaiquii	Hendrickx et al., 2015	Portezuelo Formation	Futalognko site, Lago Bareales	Neuquén Province	Argentina	Turonian	Late Cretaceous	Juvenile	Right	mx10	Lateral	7.65	3.51	11.22	13.92	0.458824	1.46667	6.61	3.17	0.479576	/	/	/	2?/1 mm	tenuous on lingual side	absent	absent	absent	?	?	?	?	?	?	/	/	/	17.5	17.5	?	/	17.5
445	Neovenator	Neovenator lateral	Neovenatoridae	Neovenatoridae Lateral	MIWG 6348, well preserved root, fractured middle crown	Isolated	salerii	Hendrickx et al., 2015	Wessex Formation	Grange Chine, Brightstone Bay	Isle of Wight	U.K.	Barremian	Early Cretaceous	Adult?	/	Isolated	Lateral	14.28	7.71	24.87	28.99	0.539916	1.7416	12.19	6.06	0.497129	17.83	11.16	38.496	3	large, well visible	DCA short to medium	absent	absent	?	?	?	?	?	?	15	15	/	15	15	18.5	15	16.16
446	Neovenator	Neovenator lateral	Neovenatoridae	Neovenatoridae Lateral	MIWG 6348, small one	Isolated	salerii	Hendrickx et al., 2015	Wessex Formation	Grange Chine, Brightstone Bay	Isle of Wight	U.K.	Barremian	Early Cretaceous	Adult?	/	Isolated	Lateral	13.71	7.8	20.62	22.95	0.568928	1.50401	9.45	5.35	0.566138	14.04	8.91	38.8235	4	large to short, well visible	DC, short	absent	absent	?	?	?	?	?	?	15.5	15	/	16	18	20	15.25	18
447	Neovenator	Neovenator lateral	Neovenatoridae	Neovenatoridae Lateral	MIWG 6348, large on stone	Isolated	salerii	Hendrickx et al., 2015	Wessex Formation	Grange Chine, Brightstone Bay	Isle of Wight	U.K.	Barremian	Early Cretaceous	Adult?	/	Isolated	Lateral	18.12	9.79	40.16	36.63	0.540287	2.21634	13.93	8.55	0.613783	23.07	13.56	37.0188	3	large, well pronounced close to D carina	DA, short to medium	absent	absent	?	?	?	?	?	?	?	15	/	13	14.5	15	15	14.16
448	Fukuiraptor	Fukuiraptor lateral	Neovenatoridae	Neovenatoridae Lateral	FPDM-V96080810	Isolated mx	kitadaniensis	Currie & Azuma, 2006	Kitadani Formation	Kitadani locality, Sugiyama River, Katsuyama	Fukui Prefecture	Japan	Barremian	Early Cretaceous	?	/	Isolated mx	Lateral	18	7.5	50	?	0.416667	2.77778	?	?	?	?	?	?	?	?	?	?	?	?	?	?	?	?	?	?	12.5	?	?	12.5	?	12.5	12.5
449	Fukuiraptor	Fukuiraptor lateral	Neovenatoridae	Neovenatoridae Lateral	FPDM-V97081128	Isolated d	kitadaniensis	Currie & Azuma, 2006	Kitadani Formation	Kitadani locality, Sugiyama River, Katsuyama	Fukui Prefecture	Japan	Barremian	Early Cretaceous	?	/	Isolated d	Lateral	17.4	7.5	33.4	?	0.431034	1.91954	?	?	?	?	?	?	?	?	?	?	?	?	?	?	?	?	?	?	16.5	?	?	16.5	?	16.5	16.5
450	Fukuiraptor	Fukuiraptor lateral	Neovenatoridae	Neovenatoridae Lateral	FPDM-V97082330	Isolated mx	kitadaniensis	Currie & Azuma, 2006	Kitadani Formation	Kitadani locality, Sugiyama River, Katsuyama	Fukui Prefecture	Japan	Barremian	Early Cretaceous	?	/	Isolated mx	Lateral	9	5.1	17	?	0.566667	1.88889	?	?	?	?	?	?	?	?	?	?	?	?	?	?	?	?	?	?	17	?	?	17	?	17	17
451	Fukuiraptor	Fukuiraptor lateral	Neovenatoridae	Neovenatoridae Lateral	FPDM-V97082574	Isolated mx	kitadaniensis	Currie & Azuma, 2006	Kitadani Formation	Kitadani locality, Sugiyama River, Katsuyama	Fukui Prefecture	Japan	Barremian	Early Cretaceous	?	/	Isolated mx	Lateral	11.9	5.7	33	?	0.478992	2.77311	?	?	?	?	?	?	?	?	?	?	?	?	?	?	?	?	?	?	17.5	?	?	17.5	?	17.5	17.5
452	Fukuiraptor	Fukuiraptor lateral	Neovenatoridae	Neovenatoridae Lateral	FPDM-V9712203	Isolated mx	kitadaniensis	Currie & Azuma, 2006	Kitadani Formation	Kitadani locality, Sugiyama River, Katsuyama	Fukui Prefecture	Japan	Barremian	Early Cretaceous	Subadult	/	Isolated mx	Lateral	15.4	6.1	31.3	?	0.396104	2.03247	?	?	?	?	?	?	?	?	?	?	?	?	?	?	?	?	?	?	14	?	?	14	?	14	14
453	Fukuiraptor	Fukuiraptor mesial	Neovenatoridae	Neovenatoridae Mesial	FPDM-V9712204	Isolated d	kitadaniensis	Currie & Azuma, 2006	Kitadani Formation	Kitadani locality, Sugiyama River, Katsuyama	Fukui Prefecture	Japan	Barremian	Early Cretaceous	Subadult	/	Isolated d	Mesial	13.2	8.2	34	?	0.621212	2.57576	?	?	?	?	?	?	?	?	?	?	?	?	?	?	?	?	?	?	15	?	?	15	?	15	15
454	Fukuiraptor	Fukuiraptor lateral	Neovenatoridae	Neovenatoridae Lateral	FPDM-V9712233	Isolated d	kitadaniensis	Currie & Azuma, 2006	Kitadani Formation	Kitadani locality, Sugiyama River, Katsuyama	Fukui Prefecture	Japan	Barremian	Early Cretaceous	?	/	Isolated d	Lateral	11.5	5.6	18.8	?	0.486957	1.63478	?	?	?	?	?	?	?	?	?	?	?	?	?	?	?	?	?	?	19	?	?	16	?	19	16
455	Fukuiraptor	Fukuiraptor lateral	Neovenatoridae	Neovenatoridae Lateral	FPDM-V9712234	Isolated mx	kitadaniensis	Currie & Azuma, 2006	Kitadani Formation	Kitadani locality, Sugiyama River, Katsuyama	Fukui Prefecture	Japan	Barremian	Early Cretaceous	?	/	Isolated mx	Lateral	10.4	4.6	12.6	?	0.442308	1.21154	?	?	?	?	?	?	?	?	?	?	?	?	?	?	?	?	?	?	16.5	?	?	16.5	?	16.5	16.5
456	Fukuiraptor	Fukuiraptor lateral	Neovenatoridae	Neovenatoridae Lateral	FPDM-V9712236	Isolated d	kitadaniensis	Currie & Azuma, 2006	Kitadani Formation	Kitadani locality, Sugiyama River, Katsuyama	Fukui Prefecture	Japan	Barremian	Early Cretaceous	?	/	Isolated d	Lateral	12	5	18.5	?	0.416667	1.54167	?	?	?	?	?	?	?	?	?	?	?	?	?	?	?	?	?	?	19	?	?	16	?	19	16
457	Fukuiraptor	Fukuiraptor lateral	Neovenatoridae	Neovenatoridae Lateral	FPDM-V980721002	Isolated d	kitadaniensis	Currie & Azuma, 2006	Kitadani Formation	Kitadani locality, Sugiyama River, Katsuyama	Fukui Prefecture	Japan	Barremian	Early Cretaceous	?	/	Isolated d	Lateral	9.9	4.2	18	?	0.424242	1.81818	?	?	?	?	?	?	?	?	?	?	?	?	?	?	?	?	?	?	19.5	?	?	18	?	19.5	18
458	Fukuiraptor	Fukuiraptor lateral	Neovenatoridae	Neovenatoridae Lateral	FPDM-V980810141	Isolated mx	kitadaniensis	Currie & Azuma, 2006	Kitadani Formation	Kitadani locality, Sugiyama River, Katsuyama	Fukui Prefecture	Japan	Barremian	Early Cretaceous	?	/	Isolated mx	Lateral	15.9	5.6	34	?	0.352201	2.13836	?	?	?	?	?	?	?	?	?	?	?	?	?	?	?	?	?	?	14	?	?	13	?	14	13
459	Fukuiraptor	Fukuiraptor lateral	Neovenatoridae	Neovenatoridae Lateral	FPDM-V980813008	Isolated mx	kitadaniensis	Currie & Azuma, 2006	Kitadani Formation	Kitadani locality, Sugiyama River, Katsuyama	Fukui Prefecture	Japan	Barremian	Early Cretaceous	?	/	Isolated mx	Lateral	10.5	5.6	23	?	0.533333	2.19048	?	?	?	?	?	?	?	?	?	?	?	?	?	?	?	?	?	?	16	?	?	16	?	16	16
460	Fukuiraptor	Fukuiraptor lateral	Neovenatoridae	Neovenatoridae Lateral	FPDM-V98081540	Isolated mx	kitadaniensis	Currie & Azuma, 2006	Kitadani Formation	Kitadani locality, Sugiyama River, Katsuyama	Fukui Prefecture	Japan	Barremian	Early Cretaceous	?	/	Isolated mx	Lateral	22	7.5	54.8	?	0.340909	2.49091	?	?	?	?	?	?	?	?	?	?	?	?	?	?	?	?	?	?	14	?	?	12.5	?	14	12.5
461	Fukuiraptor	Fukuiraptor lateral	Neovenatoridae	Neovenatoridae Lateral	FPDM-V981200012	Isolated d	kitadaniensis	Currie & Azuma, 2006	Kitadani Formation	Kitadani locality, Sugiyama River, Katsuyama	Fukui Prefecture	Japan	Barremian	Early Cretaceous	?	/	Isolated d	Lateral	5	2.3	6	?	0.46	1.2	?	?	?	?	?	?	?	?	?	?	?	?	?	?	?	?	?	?	25	?	?	22	?	25	22
462	Fukuiraptor	Fukuiraptor lateral	Neovenatoridae	Neovenatoridae Lateral	NDC-P0001	Isolated	kitadaniensis	Molnar et al., 2009	Sebayashi Formation	Sebayashi	Sanchu area	Japan	Upper Hauterivian-Barremian	Late Cretaceous	?	/	Isolated	Lateral	16.75	6.2	34.8	40.4	0.370149	2.07761	?	?	?	?	?	?	?	?	?	?	?	?	?	?	?	60	?	?	?	?	?	?	?	?	?
463	Australovenator	Australovenator mesial	Neovenatoridae	Neovenatoridae Mesial	AODF 604-341	Isolated Mesial	wintonensis	Hocknull et al., 2009	Winton Formation	AODF 85, ‘‘Matilda Site’’, Elderslie Station	Queensland	Australia	latest Albian	'Middle Cretaceous'	?	/	Isolated Mesial	Mesial	7.16	5.12	13.83	14.45	0.715084	1.93156	5.46	?	?	?	?	?	?	?	?	?	?	?	?	?	?	?	?	?	?	?	?	?	?	?	?
464	Australovenator	Australovenator mesial	Neovenatoridae	Neovenatoridae Mesial	AODF 604-42	Isolated Mesial	wintonensis	Hocknull et al., 2009	Winton Formation	AODF 85, ‘‘Matilda Site’’, Elderslie Station	Queensland	Australia	latest Albian	'Middle Cretaceous'	?	/	Isolated Mesial	Mesial	6.84	5.25	14.62	16.65	0.767544	2.13743	6	?	?	?	?	?	?	?	?	?	?	?	?	?	?	?	?	?	?	?	?	?	?	?	?
465	Australovenator	Australovenator lateral	Neovenatoridae	Neovenatoridae Lateral	AODF 604-343a	Isolated	wintonensis	Hocknull et al., 2009	Winton Formation	AODF 85, ‘‘Matilda Site’’, Elderslie Station	Queensland	Australia	latest Albian	'Middle Cretaceous'	?	/	Isolated	Lateral	8.32	3.99	12.53	16.26	0.479567	1.50601	6.29	?	?	?	?	?	?	?	?	?	?	?	?	?	?	?	?	?	?	?	?	?	?	?	?
466	Australovenator	Australovenator lateral	Neovenatoridae	Neovenatoridae Lateral	AODF 604-343b	Isolated	wintonensis	Hocknull et al., 2009	Winton Formation	AODF 85, ‘‘Matilda Site’’, Elderslie Station	Queensland	Australia	latest Albian	'Middle Cretaceous'	?	/	Isolated	Lateral	11.11	5.94	20.85	23.66	0.534653	1.87669	10.03	?	?	?	?	?	?	?	?	?	?	?	?	?	?	?	?	?	?	?	?	?	?	?	?
467	Australovenator	Australovenator lateral	Neovenatoridae	Neovenatoridae Lateral	AODF 604-342	Isolated	wintonensis	Hocknull et al., 2009	Winton Formation	AODF 85, ‘‘Matilda Site’’, Elderslie Station	Queensland	Australia	latest Albian	'Middle Cretaceous'	?	/	Isolated	Lateral	9.3	4.97	17.21	20.1	0.534409	1.85054	8.24	?	?	?	?	?	?	?	?	?	?	?	?	?	?	?	?	?	?	?	?	?	?	?	?
468	Australovenator	Australovenator lateral	Neovenatoridae	Neovenatoridae Lateral	AODF 604-344	Isolated	wintonensis	Hocknull et al., 2009	Winton Formation	AODF 85, ‘‘Matilda Site’’, Elderslie Station	Queensland	Australia	latest Albian	'Middle Cretaceous'	?	/	Isolated	Lateral	10.81	6.37	21.97	25.6	0.589269	2.03238	9.3	?	?	?	?	?	?	?	?	?	?	?	?	?	?	?	?	?	?	?	?	?	?	?	?
469	Australovenator	Australovenator lateral	Neovenatoridae	Neovenatoridae Lateral	AODF 831	Isolated	wintonensis	White et al., 2015	Winton Formation	Matilda site	Queensland	Australia	latest Albian	'Middle Cretaceous'	?	/	Isolated	Lateral	7.3	4.8	12.5	?	0.657534	1.71233	?	?	?	?	?	?	?	?	?	?	?	?	?	?	?	?	?	?	/	?	?	15	?	?	?
470	Australovenator	Australovenator lateral	Neovenatoridae	Neovenatoridae Lateral	AODF 822	Isolated	wintonensis	White et al., 2015	Winton Formation	Matilda site	Queensland	Australia	latest Albian	'Middle Cretaceous'	?	/	Isolated	Lateral	6.8	6	14	?	0.882353	2.05882	?	?	?	?	?	?	?	?	?	?	?	?	?	?	?	?	?	?	15	?	?	15	?	?	?
471	Australovenator	Australovenator lateral	Neovenatoridae	Neovenatoridae Lateral	AODF 823	Isolated	wintonensis	White et al., 2015	Winton Formation	Matilda site	Queensland	Australia	latest Albian	'Middle Cretaceous'	?	/	Isolated	Lateral	9.3	5.5	13.6	?	0.591398	1.46237	?	?	?	?	?	?	?	?	?	?	?	?	?	?	?	?	?	?	/	?	?	15	?	?	?
472	Australovenator	Australovenator lateral	Neovenatoridae	Neovenatoridae Lateral	AODF 824	Isolated	wintonensis	White et al., 2015	Winton Formation	Matilda site	Queensland	Australia	latest Albian	'Middle Cretaceous'	?	/	Isolated	Lateral	8.4	4.3	12.8	?	0.511905	1.52381	?	?	?	?	?	?	?	?	?	?	?	?	?	?	?	?	?	?	/	?	?	15	?	?	?
473	Australovenator	Australovenator lateral	Neovenatoridae	Neovenatoridae Lateral	AODF 825	Isolated	wintonensis	White et al., 2015	Winton Formation	Matilda site	Queensland	Australia	latest Albian	'Middle Cretaceous'	?	/	Isolated	Lateral	10	6.2	18.4	?	0.62	1.84	?	?	?	?	?	?	?	?	?	?	?	?	?	?	?	?	?	?	10	?	?	15	?	?	?
474	Australovenator	Australovenator lateral	Neovenatoridae	Neovenatoridae Lateral	AODF 826	Isolated	wintonensis	White et al., 2015	Winton Formation	Matilda site	Queensland	Australia	latest Albian	'Middle Cretaceous'	?	/	Isolated	Lateral	9.5	6.5	16.5	?	0.684211	1.73684	?	?	?	?	?	?	?	?	?	?	?	?	?	?	?	?	?	?	/	?	?	15	?	?	?
475	Australovenator	Australovenator lateral	Neovenatoridae	Neovenatoridae Lateral	AODF 829	Isolated	wintonensis	White et al., 2015	Winton Formation	Matilda site	Queensland	Australia	latest Albian	'Middle Cretaceous'	?	/	Isolated	Lateral	10.4	5.7	16.4	?	0.548077	1.57692	?	?	?	?	?	?	?	?	?	?	?	?	?	?	?	?	?	?	/	?	?	15	?	?	?
476	Australovenator	Australovenator lateral	Neovenatoridae	Neovenatoridae Lateral	AODF 828	Isolated	wintonensis	White et al., 2015	Winton Formation	Matilda site	Queensland	Australia	latest Albian	'Middle Cretaceous'	?	/	Isolated	Lateral	9.4	5.8	14.4	?	0.617021	1.53191	?	?	?	?	?	?	?	?	?	?	?	?	?	?	?	?	?	?	/	?	?	15	?	?	?
477	Australovenator	Australovenator mesial	Neovenatoridae	Neovenatoridae Mesial	AODF 664	Isolated mesial	wintonensis	White et al., 2015	Winton Formation	Pegler's site	Queensland	Australia	latest Albian	'Middle Cretaceous'	?	/	Isolated Mesial	Mesial	5.3	4.1	9	?	0.773585	1.69811	?	?	?	?	?	?	?	?	?	?	?	?	?	?	?	?	?	?	/	?	?	15	?	?	?
478	Australovenator	Australovenator mesial	Neovenatoridae	Neovenatoridae Mesial	AODF 820	Isolated mesial	wintonensis	White et al., 2015	Winton Formation	Pete site	Queensland	Australia	latest Albian	'Middle Cretaceous'	?	/	Isolated Mesial	Mesial	9.7	7.2	16.5	?	0.742268	1.70103	?	?	?	?	?	?	?	?	?	?	?	?	?	?	?	?	?	?	15	?	?	15	?	?	?
479	Australovenator	Australovenator mesial	Neovenatoridae	Neovenatoridae Mesial	AODF 819	Isolated mesial	wintonensis	White et al., 2015	Winton Formation	Wade site	Queensland	Australia	latest Albian	'Middle Cretaceous'	?	/	Isolated Mesial	Mesial	8.3	10.2	17.8	?	1.22892	2.14458	?	?	?	?	?	?	?	?	?	?	?	?	?	?	?	?	?	?	/	?	?	10	?	?	?
480	Cf. Acrocanthosaurus	Acrocanthosaurus lateral	Carcharodontosauridae	Carcharodontosauridae Lateral	SMU Acrocan.	Isolated	sp.	Hendrickx et al., 2015	Antlers Formation, Trinity Group	Greenwood Canyon?	Texas	U.S.	Aptian-Albian	'Middle Cretaceous'	?	/	Isolated	Lateral	30.7	19	95.4	89.5	0.618893	3.10749	24.2	16.1	0.665289	31.9	57.6	64.3575	1	?	?	absent	absent	1.7	1.8	3.1	3	?	?	9	10	/	11	12	17	9.5	13.3333
481	Cf. Acrocanthosaurus	Acrocanthosaurus lateral	Carcharodontosauridae	Carcharodontosauridae Lateral	SMU 73417	Isolated	sp.	Hendrickx et al., 2015	Antlers Formation, Trinity Group	Greenwood Canyon?	Texas	U.S.	Aptian-Albian	'Middle Cretaceous'	?	/	Isolated	Lateral	23.1	10.6	58.9	60.8	0.458874	2.54978	17.6	9.3	0.528409	?	?	?	5	?	?	absent	absent	4.6	3.6	2.8	3	?	?	13	20	/	14	14	26	16.5	18
482	Acrocanthosaurus	Acrocanthosaurus mesial	Carcharodontosauridae	Carcharodontosauridae Mesial	NCSM 14345	pm01	atokensis	Hendrickx et al., 2015	Antlers Formation, Trinity Group	McCurtain County	Oklahoma	U.S.	Aptian-Albian	'Middle Cretaceous'	Adult	Right	pm01	Mesial	21.12	16.16	49.12	50.35	0.765152	2.32576	15.55	13.53	0.870096	22.94	27.41	54.4389	0	absent	absent	absent	absent	?	?	?	?	?	?	13.75	18	/	12	11.5	?	15.875	11.75
483	Acrocanthosaurus	Acrocanthosaurus mesial	Carcharodontosauridae	Carcharodontosauridae Mesial	NCSM 14345	pm03	atokensis	Hendrickx et al., 2015	Antlers Formation, Trinity Group	McCurtain County	Oklahoma	U.S.	Aptian-Albian	'Middle Cretaceous'	Adult	Right	pm03	Mesial	28.63	16.61	63.42	62.9	0.580161	2.21516	17.97	12.99	0.722871	19.72	43.18	68.6486	0	absent	absent	absent	absent	?	?	?	?	?	?	13.5	18	/	12.5	13.33	18.33	15.75	12.915
484	Acrocanthosaurus	Acrocanthosaurus mesial	Carcharodontosauridae	Carcharodontosauridae Mesial	NCSM 14345	pm01	atokensis	Hendrickx et al., 2015	Antlers Formation, Trinity Group	McCurtain County	Oklahoma	U.S.	Aptian-Albian	'Middle Cretaceous'	Adult	Left	pm01	Mesial	20.56	20.82	49.51	49.17	1.01265	2.40807	15.66	13.76	0.878672	22.84	26.33	53.5489	0	absent	absent	absent	absent	?	?	?	?	?	?	14	19	/	14	13	19	16.5	13.5
485	Acrocanthosaurus	Acrocanthosaurus mesial	Carcharodontosauridae	Carcharodontosauridae Mesial	NCSM 14345	pm03	atokensis	Hendrickx et al., 2015	Antlers Formation, Trinity Group	McCurtain County	Oklahoma	U.S.	Aptian-Albian	'Middle Cretaceous'	Adult	Left	pm03	Mesial	24.05	16.59	63.44	59.51	0.689813	2.63784	18.21	12.63	0.693575	17.17	42.34	71.1477	0	absent	absent	absent	absent	?	?	?	?	?	?	12	17	/	13	12	?	14.5	12.5
486	Acrocanthosaurus	Acrocanthosaurus mesial	Carcharodontosauridae	Carcharodontosauridae Mesial	NCSM 14345	mx01	atokensis	Hendrickx et al., 2015	Antlers Formation, Trinity Group	McCurtain County	Oklahoma	U.S.	Aptian-Albian	'Middle Cretaceous'	Adult	Left	mx01	Mesial	26.01	16.87	51.84	63.55	0.648597	1.99308	17.89	10.07	0.562884	0	63.55	100	2/10 mm	tenuous on the lingual side	absent	absent	absent	?	?	?	?	?	?	13.5	16	18.75	13.33	13.33	15	16.08	13.88
487	Acrocanthosaurus	Acrocanthosaurus lateral	Carcharodontosauridae	Carcharodontosauridae Lateral	NCSM 14345	mx02	atokensis	Hendrickx et al., 2015	Antlers Formation, Trinity Group	McCurtain County	Oklahoma	U.S.	Aptian-Albian	'Middle Cretaceous'	Adult	Left	mx02	Lateral	38.87	20.28	90.06	93.61	0.521739	2.31695	27.61	16.44	0.595436	?	?	?	2/7mm; 2-3/10mm	well visible on the lingual side	absent	absent	absent	?	?	?	?	?	?	13.75	15	17	10	13	19	15.25	14
488	Acrocanthosaurus	Acrocanthosaurus lateral	Carcharodontosauridae	Carcharodontosauridae Lateral	NCSM 14345	mx04	atokensis	Young et al., 2019 (C.H. pers. measurements)	Antlers Formation, Trinity Group	McCurtain County	Oklahoma	U.S.	Aptian-Albian	'Middle Cretaceous'	Adult	Left	mx04	Lateral	38.77	22.18	94.96	94.12	0.572092	2.44932	27.65	16.9	0.611212	0	94.12	100	3/10 mm	well visible on the lingual side	absent	absent	absent	?	?	?	?	?	?	12	12	16.25	11.5	13	17.5	13.41	14
489	Acrocanthosaurus	Acrocanthosaurus lateral	Carcharodontosauridae	Carcharodontosauridae Lateral	NCSM 14345	mx01	atokensis	Young et al., 2019 (C.H. pers. measurements)	Antlers Formation, Trinity Group	McCurtain County	Oklahoma	U.S.	Aptian-Albian	'Middle Cretaceous'	Adult	Right	mx01	Lateral	27.92	18.59	73.58	70.28	0.665831	2.63539	20.54	14.19	0.690847	23.21	47.07	66.975	2/5mm	well-visible on the labial side	DC short	absent	absent	?	?	?	?	?	?	12.5	16.5	/	10.5	15	23	15.5	16.66
490	Acrocanthosaurus	Acrocanthosaurus lateral	Carcharodontosauridae	Carcharodontosauridae Lateral	NCSM 14345	mx02	atokensis	Young et al., 2019 (C.H. pers. measurements)	Antlers Formation, Trinity Group	McCurtain County	Oklahoma	U.S.	Aptian-Albian	'Middle Cretaceous'	Adult	Right	mx02	Lateral	32.97	21.39	66.25	74.68	0.648772	2.0094	23.25	14.69	0.631828	?	?	?	2/5mm	well-visible on the labial side	absent	absent	absent	?	?	?	?	?	?	9	13	/	11.25	12	14.5	11.5	12.58
491	Acrocanthosaurus	Acrocanthosaurus lateral	Carcharodontosauridae	Carcharodontosauridae Lateral	NCSM 14345	mx03	atokensis	Young et al., 2019 (C.H. pers. measurements)	Antlers Formation, Trinity Group	McCurtain County	Oklahoma	U.S.	Aptian-Albian	'Middle Cretaceous'	Adult	Right	mx03	Lateral	37.85	21.61	92.03	92.82	0.570938	2.43144	27.86	16.58	0.595118	26.28	66.54	71.6871	2/5mm	well-visible on the labial side	absent	absent	absent	?	?	?	?	?	?	11.3	11	/	12.5	15	?	12.98	13.75
492	Acrocanthosaurus	Acrocanthosaurus lateral	Carcharodontosauridae	Carcharodontosauridae Lateral	NCSM 14345	mx04	atokensis	Young et al., 2019 (C.H. pers. measurements)	Antlers Formation, Trinity Group	McCurtain County	Oklahoma	U.S.	Aptian-Albian	'Middle Cretaceous'	Adult	Right	mx04	Lateral	33.23	18.83	71.01	74.62	0.566657	2.13692	24.33	15.14	0.622277	0	74.62	100	2-3/5mm	well-visible on the labial side	absent	absent	absent	?	?	?	?	?	?	9.5	12	18	12	11.5	15	13.16	12.83
493	Acrocanthosaurus	Acrocanthosaurus lateral	Carcharodontosauridae	Carcharodontosauridae Lateral	NCSM 14345	mx05	atokensis	Young et al., 2019 (C.H. pers. measurements)	Antlers Formation, Trinity Group	McCurtain County	Oklahoma	U.S.	Aptian-Albian	'Middle Cretaceous'	Adult	Right	mx05	Lateral	39.85	21.96	91.33	92.57	0.551066	2.29184	29.7	17.46	0.587879	26.75	65.82	71.1029	2-3/5mm	well-visible on the labial side	DC short	absent	absent	?	?	?	?	?	?	11	12.5	/	12	14	18.33	12.83	14.776
494	Acrocanthosaurus	Acrocanthosaurus lateral	Carcharodontosauridae	Carcharodontosauridae Lateral	NCSM 14345	mx06	atokensis	Young et al., 2019 (C.H. pers. measurements)	Antlers Formation, Trinity Group	McCurtain County	Oklahoma	U.S.	Aptian-Albian	'Middle Cretaceous'	Adult	Right	mx06	Lateral	40.35	19.95	89.18	97.97	0.494424	2.21016	29.13	15.53	0.533127	18.22	79.75	81.4025	3/5mm	well-visible on the labial side	absent	absent	absent	?	?	?	?	?	?	12	12	/	12.5	14	15	12	13.83
495	Acrocanthosaurus	Acrocanthosaurus lateral	Carcharodontosauridae	Carcharodontosauridae Lateral	NCSM 14345	mx08	atokensis	Young et al., 2019 (C.H. pers. measurements)	Antlers Formation, Trinity Group	McCurtain County	Oklahoma	U.S.	Aptian-Albian	'Middle Cretaceous'	Adult	Right	mx08	Lateral	31.54	19.1	73.41	97.14	0.60558	2.32752	23.77	14.87	0.625578	?	?	?	3/5mm	visible on the labial side	absent	absent	absent	?	?	?	?	?	?	13	12	?	11.25	14.5	17	12.5	14.25
496	Acrocanthosaurus	Acrocanthosaurus lateral	Carcharodontosauridae	Carcharodontosauridae Lateral	NCSM 14345	mx09	atokensis	Young et al., 2019 (C.H. pers. measurements)	Antlers Formation, Trinity Group	McCurtain County	Oklahoma	U.S.	Aptian-Albian	'Middle Cretaceous'	Adult	Right	mx09	Lateral	29.47	15.58	62.68	71.54	0.528673	2.12691	21.88	11.68	0.533821	?	?	?	?	?	absent	absent	absent	?	?	?	?	?	?	?	12.5	?	?	15	?	12.81	15
497	Acrocanthosaurus	Acrocanthosaurus mesial	Carcharodontosauridae	Carcharodontosauridae Mesial	NCSM 14345	d01	atokensis	Young et al., 2019 (C.H. pers. measurements)	Antlers Formation, Trinity Group	McCurtain County	Oklahoma	U.S.	Aptian-Albian	'Middle Cretaceous'	Adult	Left	d01	Mesial	14.67	13.12	33.66	37.63	0.894342	2.29448	12.22	9.91	0.810966	?	?	?	?	?	?	absent	absent	?	?	?	?	?	?	21?	?	?	13.75	?	?	?	13.75
498	Acrocanthosaurus	Acrocanthosaurus mesial	Carcharodontosauridae	Carcharodontosauridae Mesial	NCSM 14345	d02	atokensis	Young et al., 2019 (C.H. pers. measurements)	Antlers Formation, Trinity Group	McCurtain County	Oklahoma	U.S.	Aptian-Albian	'Middle Cretaceous'	Adult	Left	d02	Mesial	24.18	20.73	68.47	74.61	0.85732	2.83168	19.02	15.7	0.825447	?	?	?	?	?	?	absent	absent	?	?	?	?	?	?	?	?	?	?	?	?	?	?
499	Acrocanthosaurus	Acrocanthosaurus lateral	Carcharodontosauridae	Carcharodontosauridae Lateral	NCSM 14345	d04	atokensis	Young et al., 2019 (C.H. pers. measurements)	Antlers Formation, Trinity Group	McCurtain County	Oklahoma	U.S.	Aptian-Albian	'Middle Cretaceous'	Adult	Left	d04	Lateral	31.64	18.96	82.62	86.44	0.599241	2.61125	23.46	16.66	0.710145	?	?	?	?	?	?	absent	absent	?	?	?	?	?	?	?	?	?	13.25	15	?	?	14.125
500	Acrocanthosaurus	Acrocanthosaurus lateral	Carcharodontosauridae	Carcharodontosauridae Lateral	NCSM 14345	d05	atokensis	Young et al., 2019 (C.H. pers. measurements)	Antlers Formation, Trinity Group	McCurtain County	Oklahoma	U.S.	Aptian-Albian	'Middle Cretaceous'	Adult	Left	d05	Lateral	30.09	17.36	70.98	76.22	0.576936	2.35892	24.54	14.56	0.593317	?	?	?	?	?	?	absent	absent	?	?	?	?	?	?	?	?	?	12.5	15	?	?	13.75
501	Acrocanthosaurus	Acrocanthosaurus lateral	Carcharodontosauridae	Carcharodontosauridae Lateral	NCSM 14345	d07	atokensis	Young et al., 2019 (C.H. pers. measurements)	Antlers Formation, Trinity Group	McCurtain County	Oklahoma	U.S.	Aptian-Albian	'Middle Cretaceous'	Adult	Left	d07	Lateral	30.89	16.06	62.87	69.8	0.519909	2.03529	22.45	12.87	0.573274	?	?	?	?	?	?	absent	absent	?	?	?	?	?	?	?	?	?	12.5	15	?	?	13.75
502	Acrocanthosaurus	Acrocanthosaurus lateral	Carcharodontosauridae	Carcharodontosauridae Lateral	NCSM 14345	d08	atokensis	Young et al., 2019 (C.H. pers. measurements)	Antlers Formation, Trinity Group	McCurtain County	Oklahoma	U.S.	Aptian-Albian	'Middle Cretaceous'	Adult	Left	d08	Lateral	31.06	16.8	55.84	56.6	0.540889	1.79781	20.53	11.96	0.582562	?	?	?	?	?	?	absent	absent	?	?	?	?	?	?	14.375	13.75	?	13	15	?	14	14
503	Acrocanthosaurus	Acrocanthosaurus lateral	Carcharodontosauridae	Carcharodontosauridae Lateral	NCSM 14345	d10	atokensis	Young et al., 2019 (C.H. pers. measurements)	Antlers Formation, Trinity Group	McCurtain County	Oklahoma	U.S.	Aptian-Albian	'Middle Cretaceous'	Adult	Left	d10	Lateral	27.93	13.63	47.26	55.82	0.488006	1.69209	21.91	12	0.547695	?	?	?	?	?	?	absent	absent	?	?	?	?	?	?	?	16.25 (MCA)	?	14.5	15	?	16.25	14.75
504	Acrocanthosaurus	Acrocanthosaurus lateral	Carcharodontosauridae	Carcharodontosauridae Lateral	NCSM 14345	d12	atokensis	Young et al., 2019 (C.H. pers. measurements)	Antlers Formation, Trinity Group	McCurtain County	Oklahoma	U.S.	Aptian-Albian	'Middle Cretaceous'	Adult	Left	d12	Lateral	24.87	13.54	39.66	49.15	0.544431	1.59469	20.42	9.65	0.472576	29.13	20.02	40.7325	?	?	?	absent	absent	?	?	?	?	?	?	14.5	16.25	?	?	16	?	16.66	16
505	Acrocanthosaurus	Acrocanthosaurus lateral	Carcharodontosauridae	Carcharodontosauridae Lateral	NCSM 14345	d13	atokensis	Young et al., 2019 (C.H. pers. measurements)	Antlers Formation, Trinity Group	McCurtain County	Oklahoma	U.S.	Aptian-Albian	'Middle Cretaceous'	Adult	Left	d13	Lateral	20.07	11.51	29.11	38.4	0.573493	1.45042	17	9.96	0.585882	19.67	18.73	48.776	?	?	?	absent	absent	?	?	?	?	?	?	14	14.375	?	?	15	?	14.375	15
506	Acrocanthosaurus	Acrocanthosaurus mesial	Carcharodontosauridae	Carcharodontosauridae Mesial	NCSM 14345	d02	atokensis	Young et al., 2019 (C.H. pers. measurements)	Antlers Formation, Trinity Group	McCurtain County	Oklahoma	U.S.	Aptian-Albian	'Middle Cretaceous'	Adult	Right	d2	Mesial	22.63	18.23	58.49	67.09	0.805568	2.58462	15.96	12.35	0.77381	?	?	?	?	?	?	absent	absent	?	?	?	?	?	?	?	?	?	?	?	?	?	?
507	Acrocanthosaurus	Acrocanthosaurus lateral	Carcharodontosauridae	Carcharodontosauridae Lateral	NCSM 14345	d04	atokensis	Young et al., 2019 (C.H. pers. measurements)	Antlers Formation, Trinity Group	McCurtain County	Oklahoma	U.S.	Aptian-Albian	'Middle Cretaceous'	Adult	Right	d4	Lateral	31.09	20.01	73.41	79.36	0.643615	2.36121	19.68	15.3	0.777439	35.55	43.81	55.2041	?	?	?	absent	absent	?	?	?	?	?	?	12.5	11.875	?	?	14.16	18.33	12.5	16.245
508	Acrocanthosaurus	Acrocanthosaurus lateral	Carcharodontosauridae	Carcharodontosauridae Lateral	NCSM 14345	d05	atokensis	Young et al., 2019 (C.H. pers. measurements)	Antlers Formation, Trinity Group	McCurtain County	Oklahoma	U.S.	Aptian-Albian	'Middle Cretaceous'	Adult	Right	d5	Lateral	32.27	16.53	68.47	64.36	0.51224	2.12178	21.03	13.14	0.624822	?	?	?	?	?	?	absent	absent	?	?	?	?	?	?	?	?	?	12.5	13	?	?	12.75
509	Acrocanthosaurus	Acrocanthosaurus lateral	Carcharodontosauridae	Carcharodontosauridae Lateral	NCSM 14345	d06	atokensis	Young et al., 2019 (C.H. pers. measurements)	Antlers Formation, Trinity Group	McCurtain County	Oklahoma	U.S.	Aptian-Albian	'Middle Cretaceous'	Adult	Right	d6	Lateral	31.69	16.38	77.54	85.05	0.516882	2.44683	22.83	14.33	0.627683	38.3	46.75	54.9677	?	?	?	absent	absent	?	?	?	?	?	?	12	12.5	13.125	11.25	13.5	17	12.54	14.08
510	Acrocanthosaurus	Acrocanthosaurus lateral	Carcharodontosauridae	Carcharodontosauridae Lateral	NCSM 14345	d07	atokensis	Young et al., 2019 (C.H. pers. measurements)	Antlers Formation, Trinity Group	McCurtain County	Oklahoma	U.S.	Aptian-Albian	'Middle Cretaceous'	Adult	Right	d7	Lateral	30.96	18.08	67.57	77.14	0.583979	1.93992	22.24	13.05	0.586781	?	?	?	?	?	?	absent	absent	?	?	?	?	?	?	13	12.5	?	12.5	12.5	?	12.75	12.5
511	Acrocanthosaurus	Acrocanthosaurus lateral	Carcharodontosauridae	Carcharodontosauridae Lateral	NCSM 14345	d09	atokensis	Young et al., 2019 (C.H. pers. measurements)	Antlers Formation, Trinity Group	McCurtain County	Oklahoma	U.S.	Aptian-Albian	'Middle Cretaceous'	Adult	Right	d9	Lateral	32.79	15.19	60.06	73.09	0.463251	1.30711	23.06	12.36	0.535993	?	?	?	?	?	?	absent	absent	?	?	?	?	?	?	13.75	12.5	14.5	12	12.81	15	13.58	13.27
512	Acrocanthosaurus	Acrocanthosaurus lateral	Carcharodontosauridae	Carcharodontosauridae Lateral	NCSM 14345	d12	atokensis	Young et al., 2019 (C.H. pers. measurements)	Antlers Formation, Trinity Group	McCurtain County	Oklahoma	U.S.	Aptian-Albian	'Middle Cretaceous'	Adult	Right	d12	Lateral	26.07	16.14	42.86	53.08	0.619102	1.95474	17.13	10.35	0.604203	?	?	?	?	?	?	absent	absent	?	?	?	?	?	?	?	?	?	?	?	?	?	?
513	Acrocanthosaurus	Acrocanthosaurus lateral	Carcharodontosauridae	Carcharodontosauridae Lateral	NCSM 14345	d13	atokensis	Young et al., 2019 (C.H. pers. measurements)	Antlers Formation, Trinity Group	McCurtain County	Oklahoma	U.S.	Aptian-Albian	'Middle Cretaceous'	Adult	Right	d13	Lateral	24.19	14.89	50.96	60.88	0.615544	2.15916	22.25	12.5	0.561798	?	?	?	?	?	?	absent	absent	?	?	?	?	?	?	?	?	?	?	?	?	?	?
514	Acrocanthosaurus	Acrocanthosaurus mesial	Carcharodontosauridae	Carcharodontosauridae Mesial	NCSM 14345	pm01	atokensis	Smith et al., 2005	Antlers Formation, Trinity Group	McCurtain County	Oklahoma	U.S.	Aptian-Albian	'Middle Cretaceous'	Adult	Comp/	pm01	Mesial	21.7	16.26	52.23	55.15	0.749309	2.40691	?	?	?	?	?	?	?	?	?	?	?	?	?	?	?	85.64	0.13	14.4	15.1	17.9	12.7	14.1	18.8	15.8	15.2
515	Acrocanthosaurus	Acrocanthosaurus mesial	Carcharodontosauridae	Carcharodontosauridae Mesial	NCSM 14345	pm03	atokensis	Smith et al., 2005	Antlers Formation, Trinity Group	McCurtain County	Oklahoma	U.S.	Aptian-Albian	'Middle Cretaceous'	Adult	Comp/	pm03	Mesial	26.84	16.56	72.35	77.51	0.61699	2.6956	?	?	?	?	?	?	?	?	?	?	?	?	?	?	?	86.73	0.11	13.4	12.4	19	12.4	13.7	19.1	14.9	15.1
516	Acrocanthosaurus	Acrocanthosaurus lateral	Carcharodontosauridae	Carcharodontosauridae Lateral	NCSM 14345	mx01	atokensis	Smith et al., 2005	Antlers Formation, Trinity Group	McCurtain County	Oklahoma	U.S.	Aptian-Albian	'Middle Cretaceous'	Adult	Comp/	mx01	Lateral	26.73	17.56	62.6	71.29	0.65694	2.34194	?	?	?	?	?	?	?	?	?	?	?	?	?	?	?	85.95	0.08	13.5	12	19.6	13.6	14.2	18.2	15	15.3
517	Acrocanthosaurus	Acrocanthosaurus lateral	Carcharodontosauridae	Carcharodontosauridae Lateral	NCSM 14345	mx02	atokensis	Smith et al., 2005	Antlers Formation, Trinity Group	McCurtain County	Oklahoma	U.S.	Aptian-Albian	'Middle Cretaceous'	Adult	Comp/	mx02	Lateral	35.24	20.59	79.23	90.02	0.584279	2.2483	?	?	?	?	?	?	?	?	?	?	?	?	?	?	?	86.78	0.02	12.1	12.3	19.6	13.7	13.4	19.2	14.6	15.4
518	Acrocanthosaurus	Acrocanthosaurus lateral	Carcharodontosauridae	Carcharodontosauridae Lateral	NCSM 14345	mx04	atokensis	Smith et al., 2005	Antlers Formation, Trinity Group	McCurtain County	Oklahoma	U.S.	Aptian-Albian	'Middle Cretaceous'	Adult	Comp/	mx04	Lateral	36.6	20.64	87.09	97.5	0.563934	2.37951	?	?	?	?	?	?	?	?	?	?	?	?	?	?	?	87.16	0.03	12.2	12.1	16.2	13	13.6	19.5	13.5	15.4
519	Acrocanthosaurus	Acrocanthosaurus lateral	Carcharodontosauridae	Carcharodontosauridae Lateral	NCSM 14345	mx05	atokensis	Smith et al., 2005	Antlers Formation, Trinity Group	McCurtain County	Oklahoma	U.S.	Aptian-Albian	'Middle Cretaceous'	Adult	Comp/	mx05	Lateral	42.07	20.74	93.08	107.9	0.492988	2.2125	?	?	?	?	?	?	?	?	?	?	?	?	?	?	?	87.35	0.03	12.8	?	21	12.9	12.9	/	12.8	14
520	Acrocanthosaurus	Acrocanthosaurus lateral	Carcharodontosauridae	Carcharodontosauridae Lateral	NCSM 14345	mx13	atokensis	Smith et al., 2005	Antlers Formation, Trinity Group	McCurtain County	Oklahoma	U.S.	Aptian-Albian	'Middle Cretaceous'	Adult	Left	mx13	Lateral	22.43	10.87	33.79	41.87	0.484619	1.50646	?	?	?	?	?	?	?	?	?	?	?	?	?	?	?	83.11	0	/	15	/	14	16	/	15	15
521	Acrocanthosaurus	Acrocanthosaurus lateral	Carcharodontosauridae	Carcharodontosauridae Lateral	NCSM 14345	mx14	atokensis	Smith et al., 2005	Antlers Formation, Trinity Group	McCurtain County	Oklahoma	U.S.	Aptian-Albian	'Middle Cretaceous'	Adult	Comp/	mx14	Lateral	17.11	8.55	25.03	32.12	0.499708	1.46289	?	?	?	?	?	?	?	?	?	?	?	?	?	?	?	80.55	0.02	18	?	?	?	?	/	18	15
522	Acrocanthosaurus	Acrocanthosaurus lateral	Carcharodontosauridae	Carcharodontosauridae Lateral	NCSM 14345	mx03	atokensis	Smith et al., 2005	Antlers Formation, Trinity Group	McCurtain County	Oklahoma	U.S.	Aptian-Albian	'Middle Cretaceous'	Adult	Right	mx03	Lateral	37.21	21.44	90.75	101.46	0.576189	2.43886	?	?	?	?	?	?	?	?	?	?	?	?	?	?	?	87.31	0.03	12.1	11	16.8	11.7	15.3	17.8	13.3	14.9
523	Acrocanthosaurus	Acrocanthosaurus lateral	Carcharodontosauridae	Carcharodontosauridae Lateral	NCSM 14345	mx06	atokensis	Smith et al., 2005	Antlers Formation, Trinity Group	McCurtain County	Oklahoma	U.S.	Aptian-Albian	'Middle Cretaceous'	Adult	Right	mx06	Lateral	40.79	17.86	82.3	90.25	0.437852	2.01765	?	?	?	?	?	?	?	?	?	?	?	?	?	?	?	87.2	0.04	12.8	13	18	12.3	12	20	14.6	14.8
524	Acrocanthosaurus	Acrocanthosaurus lateral	Carcharodontosauridae	Carcharodontosauridae Lateral	NCSM 14345	mx08	atokensis	Smith et al., 2005	Antlers Formation, Trinity Group	McCurtain County	Oklahoma	U.S.	Aptian-Albian	'Middle Cretaceous'	Adult	Right	mx08	Lateral	31.94	16.73	66.78	76.59	0.523795	2.0908	?	?	?	?	?	?	?	?	?	?	?	?	?	?	?	86.39	0	11.3	?	/	12.1	14.9	/	11.3	13.5
525	Acrocanthosaurus	Acrocanthosaurus lateral	Carcharodontosauridae	Carcharodontosauridae Lateral	NCSM 14345	mx09	atokensis	Smith et al., 2005	Antlers Formation, Trinity Group	McCurtain County	Oklahoma	U.S.	Aptian-Albian	'Middle Cretaceous'	Adult	Right	mx09	Lateral	29.11	14.43	54.97	64	0.495706	1.88835	?	?	?	?	?	?	?	?	?	?	?	?	?	?	?	85.66	0.01	13	?	/	13.3	?	/	13	13.3
526	Acrocanthosaurus	Acrocanthosaurus lateral	Carcharodontosauridae	Carcharodontosauridae Lateral	NCSM 14345	mx11	atokensis	Smith et al., 2005	Antlers Formation, Trinity Group	McCurtain County	Oklahoma	U.S.	Aptian-Albian	'Middle Cretaceous'	Adult	Right	mx11	Lateral	26.64	11.78	39.4	46.47	0.442192	1.47898	?	?	?	?	?	?	?	?	?	?	?	?	?	?	?	84.23	0.04	16	15	/	13.8	?	/	15.5	13.8
527	Acrocanthosaurus	Acrocanthosaurus mesial	Carcharodontosauridae	Carcharodontosauridae Mesial	NCSM 14345	d01	atokensis	Smith et al., 2005	Antlers Formation, Trinity Group	McCurtain County	Oklahoma	U.S.	Aptian-Albian	'Middle Cretaceous'	Adult	Left	d01	Mesial	14.42	11.77	29.46	35.42	0.816227	2.043	?	?	?	?	?	?	?	?	?	?	?	?	?	?	?	81.53	0.14	13.4	?	/	13.3	?	/	13.4	13.3
528	Acrocanthosaurus	Acrocanthosaurus mesial	Carcharodontosauridae	Carcharodontosauridae Mesial	NCSM 14345	d02	atokensis	Smith et al., 2005	Antlers Formation, Trinity Group	McCurtain County	Oklahoma	U.S.	Aptian-Albian	'Middle Cretaceous'	Adult	Comp/	d02	Mesial	23.91	17.1	58.55	63.55	0.715182	2.44877	?	?	?	?	?	?	?	?	?	?	?	?	?	?	?	85.95	0.11	/	?	/	12.5	13	18	/	14.5
529	Acrocanthosaurus	Acrocanthosaurus lateral	Carcharodontosauridae	Carcharodontosauridae Lateral	NCSM 14345	d03	atokensis	Smith et al., 2005	Antlers Formation, Trinity Group	McCurtain County	Oklahoma	U.S.	Aptian-Albian	'Middle Cretaceous'	Adult	Left	d03	Lateral	29.63	17.63	72.23	79.2	0.595005	2.43773	?	?	?	?	?	?	?	?	?	?	?	?	?	?	?	86.7	0.07	13.8	13.3	/	15	/	/	13.55	15
530	Acrocanthosaurus	Acrocanthosaurus lateral	Carcharodontosauridae	Carcharodontosauridae Lateral	NCSM 14345	d04	atokensis	Smith et al., 2005	Antlers Formation, Trinity Group	McCurtain County	Oklahoma	U.S.	Aptian-Albian	'Middle Cretaceous'	Adult	Comp/	d04	Lateral	29.11	19.33	70.62	77.81	0.664033	2.42597	?	?	?	?	?	?	?	?	?	?	?	?	?	?	?	86.57	0.06	12.6	13.3	18.3	12.6	11.5	/	14.7	13
531	Acrocanthosaurus	Acrocanthosaurus lateral	Carcharodontosauridae	Carcharodontosauridae Lateral	NCSM 14345	d05	atokensis	Smith et al., 2005	Antlers Formation, Trinity Group	McCurtain County	Oklahoma	U.S.	Aptian-Albian	'Middle Cretaceous'	Adult	Left	d05	Lateral	30.6	18.75	60.48	68.81	0.612745	1.97647	?	?	?	?	?	?	?	?	?	?	?	?	?	?	?	86.08	0.02	13.3	?	/	13	13	18.3	13.3	14.8
532	Acrocanthosaurus	Acrocanthosaurus lateral	Carcharodontosauridae	Carcharodontosauridae Lateral	NCSM 14345	d07	atokensis	Smith et al., 2005	Antlers Formation, Trinity Group	McCurtain County	Oklahoma	U.S.	Aptian-Albian	'Middle Cretaceous'	Adult	Comp/	d07	Lateral	31.1	17.19	64.85	76.07	0.552733	2.08521	?	?	?	?	?	?	?	?	?	?	?	?	?	?	?	86.2	0.01	13.5	15.9	18.3	12	16.5	13	15.9	13.8
533	Acrocanthosaurus	Acrocanthosaurus lateral	Carcharodontosauridae	Carcharodontosauridae Lateral	NCSM 14345	d08	atokensis	Smith et al., 2005	Antlers Formation, Trinity Group	McCurtain County	Oklahoma	U.S.	Aptian-Albian	'Middle Cretaceous'	Adult	Left	d08	Lateral	26.08	16.58	43.01	58.07	0.635736	1.64916	?	?	?	?	?	?	?	?	?	?	?	?	?	?	?	84.24	0.01	15	15	/	14	13.3	17.5	15	14.9
534	Acrocanthosaurus	Acrocanthosaurus lateral	Carcharodontosauridae	Carcharodontosauridae Lateral	NCSM 14345	d10	atokensis	Smith et al., 2005	Antlers Formation, Trinity Group	McCurtain County	Oklahoma	U.S.	Aptian-Albian	'Middle Cretaceous'	Adult	Left	d10	Lateral	28.26	14.35	47.47	55.54	0.507785	1.67976	?	?	?	?	?	?	?	?	?	?	?	?	?	?	?	85.09	0.01	14	17	/	/	14.5	21	15.5	16
535	Acrocanthosaurus	Acrocanthosaurus lateral	Carcharodontosauridae	Carcharodontosauridae Lateral	NCSM 14345	d12	atokensis	Smith et al., 2005	Antlers Formation, Trinity Group	McCurtain County	Oklahoma	U.S.	Aptian-Albian	'Middle Cretaceous'	Adult	Left	d12	Lateral	24.96	13.22	38.96	49	0.529647	1.5609	?	?	?	?	?	?	?	?	?	?	?	?	?	?	?	83.93	0.01	15	17	18.8	14	15.5	/	16.9	14.5
536	Acrocanthosaurus	Acrocanthosaurus lateral	Carcharodontosauridae	Carcharodontosauridae Lateral	NCSM 14345	d14	atokensis	Smith et al., 2005	Antlers Formation, Trinity Group	McCurtain County	Oklahoma	U.S.	Aptian-Albian	'Middle Cretaceous'	Adult	Left	d14	Lateral	20.42	11.46	33.13	38.86	0.561214	1.62243	?	?	?	?	?	?	?	?	?	?	?	?	?	?	?	83.01	0.04	13	10	/	14	15	/	11.5	14.5
537	Acrocanthosaurus	Acrocanthosaurus lateral	Carcharodontosauridae	Carcharodontosauridae Lateral	NCSM 14345	d17	atokensis	Smith et al., 2005	Antlers Formation, Trinity Group	McCurtain County	Oklahoma	U.S.	Aptian-Albian	'Middle Cretaceous'	Adult	Left	d17	Lateral	15.37	9.1	16.04	22.61	0.592062	1.04359	?	?	?	?	?	?	?	?	?	?	?	?	?	?	?	76.51	0.04	12.5	?	/	13	16.7	/	12.5	15
538	Acrocanthosaurus	Acrocanthosaurus lateral	Carcharodontosauridae	Carcharodontosauridae Lateral	NCSM 14345	d05	atokensis	Smith et al., 2005	Antlers Formation, Trinity Group	McCurtain County	Oklahoma	U.S.	Aptian-Albian	'Middle Cretaceous'	Adult	Right	d05	Lateral	28.98	16.54	68.15	72.16	0.570738	2.35162	?	?	?	?	?	?	?	?	?	?	?	?	?	?	?	86.66	0.07	17.5	?	/	14	17.5	/	17.5	15.5
539	Acrocanthosaurus	Acrocanthosaurus lateral	Carcharodontosauridae	Carcharodontosauridae Lateral	NCSM 14345	d06	atokensis	Smith et al., 2005	Antlers Formation, Trinity Group	McCurtain County	Oklahoma	U.S.	Aptian-Albian	'Middle Cretaceous'	Adult	Right	d06	Lateral	31.35	16.71	62.15	72.97	0.533014	1.98246	?	?	?	?	?	?	?	?	?	?	?	?	?	?	?	86.09	0.02	12	14	19	16.3	12.8	19.5	15	16.2
540	Eocarcharia	Eocarcharia lateral	Carcharodontosauridae	Carcharodontosauridae Lateral	MNN GAD14	Isolated	dinops	Hendrickx et al., 2015	Elrhaz Formation	“Gadoufaoua”	Ténéré Desert	Niger	Aptian–Albian	'Middle Cretaceous'	Adult	/	Isolated	Lateral	24	11.5	42	45.3	0.479167	1.75	16.1	8.9	0.552795	9.4	35.9	79.2494	3	?	?	absent	absent	0.5	0.7	0.5	0.4	?	?	11	14	17	12	16	19	14	15.6
541	Eocarcharia	Eocarcharia lateral	Carcharodontosauridae	Carcharodontosauridae Lateral	MNN GAD14	Isolated	dinops	Sereno & Brusatte, 2008	Elrhaz Formation	“Gadoufaoua”	Ténéré Desert	Niger	Aptian–Albian	'Middle Cretaceous'	Adult	/	Isolated	Lateral	24	11	48	57	0.458333	2	?	?	?	?	?	?	?	?	?	?	?	?	?	?	?	?	?	?	?	?	?	?	?	13	15
542	Carcharodontosaurus	Carcharodontosaurus lateral	Carcharodontosauridae	Carcharodontosauridae Lateral	SGM Din-1	mx03	saharicus	Smith et al., 2005	Kem Kem Beds	Kem Kem	Meknès-Tafilalet	Morocco	Cenomanian	'Middle Cretaceous'	Adult	Right	mx03	Lateral	41.46	15.15	71.01	82.32	0.365412	1.71274	?	?	?	?	?	?	?	?	?	?	?	?	?	?	?	86.73	-0.13	10	8	10.2	10.3	9	12	9.4	10.4
543	Carcharodontosaurus	Carcharodontosaurus lateral	Carcharodontosauridae	Carcharodontosauridae Lateral	SGM Din-1	mx05	saharicus	Smith et al., 2005	Kem Kem Beds	Kem Kem	Meknès-Tafilalet	Morocco	Cenomanian	'Middle Cretaceous'	Adult	Right	mx05	Lateral	41.04	14.88	73.96	80.59	0.362573	1.80214	?	?	?	?	?	?	?	?	?	?	?	?	?	?	?	86.95	-0.12	9.2	7.7	10	10	9	11.2	9	10.1
544	Carcharodontosaurus	Carcharodontosaurus lateral	Carcharodontosauridae	Carcharodontosauridae Lateral	SGM Din-1	mx06	saharicus	Smith et al., 2005	Kem Kem Beds	Kem Kem	Meknès-Tafilalet	Morocco	Cenomanian	'Middle Cretaceous'	Adult	Right	mx06	Lateral	41.17	14.88	73.17	79.51	0.361428	1.77726	?	?	?	?	?	?	?	?	?	?	?	?	?	?	?	86.93	-0.12	8.5	8.9	10	10.7	9	11	9.1	10.2
545	Carcharodontosaurus	Carcharodontosaurus lateral	Carcharodontosauridae	Carcharodontosauridae Lateral	SGM Din-1	mx08	saharicus	Smith et al., 2005	Kem Kem Beds	Kem Kem	Meknès-Tafilalet	Morocco	Cenomanian	'Middle Cretaceous'	Adult	Right	mx08	Lateral	39.91	14.49	73.99	80.02	0.363067	1.85392	?	?	?	?	?	?	?	?	?	?	?	?	?	?	?	86.95	-0.11	9	8	9	10	8.2	11.8	8.7	10
546	Carcharodontosaurus	Carcharodontosaurus lateral	Carcharodontosauridae	Carcharodontosauridae Lateral	SGM Din-1	Isolated	saharicus	Smith et al., 2005	Kem Kem Beds	Kem Kem	Meknès-Tafilalet	Morocco	Cenomanian	'Middle Cretaceous'	Adult	/	Isolated	Lateral	41.53	15.09	80.68	89.82	0.363352	1.94269	?	?	?	?	?	?	?	?	?	?	?	?	?	?	?	87.12	-0.09	10	8	12	10.3	10	14	10	11.4
547	Carcharodontosaurus	Carcharodontosaurus lateral	Carcharodontosauridae	Carcharodontosauridae Lateral	SGM Din-1	Isolated	saharicus	Smith et al., 2005	Kem Kem Beds	Kem Kem	Meknès-Tafilalet	Morocco	Cenomanian	'Middle Cretaceous'	Adult	/	Isolated	Lateral	46.65	16.88	97.55	102.25	0.361844	2.0911	?	?	?	?	?	?	?	?	?	?	?	?	?	?	?	87.72	-0.12	8	8	11.6	9.5	9	11	9.2	9.8
548	Carcharodontosaurus	Carcharodontosaurus lateral	Carcharodontosauridae	Carcharodontosauridae Lateral	SGM Din-1	mx03	saharicus	Hendrickx et al., 2015	Kem Kem Beds	Kem Kem	Meknès-Tafilalet	Morocco	Cenomanian	'Middle Cretaceous'	Adult	Right	mx03	Lateral	40.6	17.1	72	81	0.421182	1.7734	29.4	15.9	0.540816	0	81	100	3	?	?	absent	absent	?	?	?	?	?	?	7	7	8	7	8.5	?	7.33	7.75
549	Carcharodontosaurus	Carcharodontosaurus lateral	Carcharodontosauridae	Carcharodontosauridae Lateral	SGM Din-1	mx05	saharicus	Hendrickx et al., 2015	Kem Kem Beds	Kem Kem	Meknès-Tafilalet	Morocco	Cenomanian	'Middle Cretaceous'	Adult	Right	mx05	Lateral	41.4	16.6	73	75	0.400966	1.76329	32.5	15.6	0.48	0	75	100	3	?	?	absent	absent	?	?	?	?	?	?	8.5	8	7.5	8	9.5	?	8	8.75
550	Carcharodontosaurus	Carcharodontosaurus lateral	Carcharodontosauridae	Carcharodontosauridae Lateral	SGM Din-1	mx06	saharicus	Hendrickx et al., 2015	Kem Kem Beds	Kem Kem	Meknès-Tafilalet	Morocco	Cenomanian	'Middle Cretaceous'	Adult	Right	mx06	Lateral	41.1	15.5	69	77	0.377129	1.67883	30	12.4	0.413333	0	77	100	3	?	?	absent	absent	?	?	?	?	?	?	7.5	8	8.5	8.5	9	9	8	8.83
551	Carcharodontosaurus	Carcharodontosaurus lateral	Carcharodontosauridae	Carcharodontosauridae Lateral	SGM Din-1	Isolated	saharicus	Hendrickx et al., 2015	Kem Kem Beds	Kem Kem	Meknès-Tafilalet	Morocco	Cenomanian	'Middle Cretaceous'	Adult	/	Isolated	Lateral	40.4	15.9	80.9	93.4	0.393564	2.00248	32.8	13.6	0.414634	0	93.4	100	3	?	?	absent	absent	3.4	3.7	2	2.5	?	?	8.5	7.5	13	9	10	10.5	9.66	9.83
552	Carcharodontosaurus	Carcharodontosaurus lateral	Carcharodontosauridae	Carcharodontosauridae Lateral	UCRC PV6	Isolated	saharicus	Hendrickx et al., 2015	Kem Kem Beds	Kem Kem	Meknès-Tafilalet	Morocco	Cenomanian	'Middle Cretaceous'	?	/	Isolated	Lateral	45.1	16.8	102.6	113	0.372506	2.27494	37.1	16.1	0.433962	0	113	100	3	?	?	absent	absent	4.6	6.7	3.3	?	?	?	6.5	8	9	7.5	8.5	10.5	7.83	8.83
553	Carcharodontosaurus	Carcharodontosaurus lateral	Carcharodontosauridae	Carcharodontosauridae Lateral	MNN IGV6	Isolated	sp.	Hendrickx et al., 2015	Kem Kem Beds	Kem Kem	Meknès-Tafilalet	Morocco	Cenomanian	'Middle Cretaceous'	?	/	Isolated	Lateral	43.8	22.6	85	89.9	0.515982	1.94064	32.6	16.1	0.493865	-11.7	101.6	113.014	3	?	?	absent	absent	3	3.6	2.7	3.3	?	?	8.5	9	15	8.5	10.5	15.5	10.83	11.5
554	Carcharodontosaurus	Carcharodontosaurus lateral	Carcharodontosauridae	Carcharodontosauridae Lateral	MNN IGV10	Isolated	sp.	Hendrickx et al., 2015	Kem Kem Beds	Kem Kem	Meknès-Tafilalet	Morocco	Cenomanian	'Middle Cretaceous'	?	/	Isolated	Lateral	30.1	19.3	60.6	67.8	0.641196	2.01329	25.1	15.4	0.613546	0	67.8	0	0	?	?	absent	absent	2	2	2.8	1.9	?	?	8.5	9.5	13	8.5	11.5	15.5	10.33	11.83
555	Carcharodontosaurus	Carcharodontosaurus lateral	Carcharodontosauridae	Carcharodontosauridae Lateral	MNN GAD12	Isolated	sp.	Hendrickx et al., 2015	Kem Kem Beds	Kem Kem	Meknès-Tafilalet	Morocco	Cenomanian	'Middle Cretaceous'	?	/	Isolated	Lateral	32.1	18.2	67.4	76.6	0.566978	2.09969	24.5	15.9	0.64898	31.4	45.2	59.0078	4	?	?	absent	absent	6.1	6.2	2.9	2.5	?	?	8.5	10	?	11.5	14	17.5	9.25	14.33
556	Carcharodontosaurus	Carcharodontosaurus lateral	Carcharodontosauridae	Carcharodontosauridae Lateral	SMNS uncatalogued, largest one (Algerien Stiftung der Gesellschaft zur Förderung des Naturkunde-museums 1993)	Isolated	sp.	Young et al., 2019 (C.H. pers. measurements)	Kem Kem Beds	Hamada du Guir	Taouz	Morocco	Cenomanian	'Middle Cretaceous'	?	/	Isolated	Lateral	43.32	23.51	99.25	109.75	0.542705	2.29109	35.08	18.08	0.515393	-13.88	123.63	100	3	Marginal undulation very well-visible close to both carinae, long DB, short M	well-developped on both D and M	absent	absent	8.41	10.32	8.14	6.81	?	?	7.5	7	15	7	8	14	9.83	9.66
557	Carcharodontosaurus	Carcharodontosaurus lateral	Carcharodontosauridae	Carcharodontosauridae Lateral	SMNS uncatalogued, medium one (Algerien Stiftung der Gesellschaft zur Förderung des Naturkunde-museums 1993)	Isolated	sp.	Young et al., 2019 (C.H. pers. measurements)	Kem Kem Beds	Hamada du Guir	Taouz	Morocco	Cenomanian	'Middle Cretaceous'	?	/	Isolated	Lateral	31.23	14.42	57.22	63.79	0.461736	1.83221	26.25	10.76	0.409905	-12.55	76.34	100	3	transversal undulations well-visible, especially on labial side close to D carina	well-developped on both D and M	absent	absent	6.42	6.39	4.45	0.99	?	?	8.5	9.5	14	9.5	10.5	17	10.66	12.33
558	Carcharodontosaurus	Carcharodontosaurus lateral	Carcharodontosauridae	Carcharodontosauridae Lateral	SMNS uncatalogued, small white (Algerien Stiftung der Gesellschaft zur Förderung des Naturkunde-museums 1993)	Isolated	sp.	Young et al., 2019 (C.H. pers. measurements)	Kem Kem Beds	Hamada du Guir	Taouz	Morocco	Cenomanian	'Middle Cretaceous'	?	/	Isolated	Lateral	26.69	13.63	42.01	45.53	0.510678	1.574	24.03	10.96	0.456097	6.14	39.39	100	2	only visible with orientating crown	well-developped on both D and M	absent	absent	?	?	?	?	?	?	9	9.5	20	?	11	16	12.83	13.5
559	Giganotosaurus	Giganotosaurus mesial	Carcharodontosauridae	Carcharodontosauridae Mesial	MUCPV-CH-1	dt3	carolinii	Hendrickx et al., 2015	Candeleros Member, Río Limay Formation	Vila El Chócon	Neuquén Province	Argentina	Albian-Cenomania	'Middle Cretaceous'	Adult	Left	dt3	Mesial	33.82	22.83	81.62	88.54	0.675044	2.41336	28.86	18.5	0.641026	0	88.54	100	?	?	well-developped DB (only visible)	absent	absent	?	?	?	?	?	?	?	8.5	?	?	9.5	13.75	8.5	11.62
560	Giganotosaurus	Giganotosaurus lateral	Carcharodontosauridae	Carcharodontosauridae Lateral	MUCPV-CH-1	dt7	carolinii	Hendrickx et al., 2015	Candeleros Member, Río Limay Formation	Vila El Chócon	Neuquén Province	Argentina	Albian-Cenomania	'Middle Cretaceous'	Adult	Left	dt7	Lateral	37.3	20.32	79.26	86.87	0.544772	2.12493	30.65	16.18	0.527896	0	86.87	100	3	well-visible on the labial side at the tip	absent both mesially and distally	absent	absent	?	?	?	?	?	?	?	9	13.5	?	9.5	11	11.25	10.25
561	Giganotosaurus	Giganotosaurus lateral	Carcharodontosauridae	Carcharodontosauridae Lateral	MUCPV-CH-1 complete root and crown	Isolated	carolinii	Hendrickx et al., 2015	Candeleros Member, Río Limay Formation	Vila El Chócon	Neuquén Province	Argentina	Albian-Cenomania	'Middle Cretaceous'	Adult	/	Isolated	Lateral	37.83	21.07	96.02	97.74	0.556965	2.5382	33.33	17.54	0.526253	?	?	?	2	visible on both sides	well developped on D, medium to absent on M	absent	absent	?	?	?	?	?	?	7	7.5	10	8	8.5	?	8.16	8.25
562	Giganotosaurus	Giganotosaurus lateral	Carcharodontosauridae	Carcharodontosauridae Lateral	MUCPV-CH-1 L1 small	Isolated	carolinii	Hendrickx et al., 2015	Candeleros Member, Río Limay Formation	Vila El Chócon	Neuquén Province	Argentina	Albian-Cenomania	'Middle Cretaceous'	Adult	/	Isolated	Lateral	30.86	19.37	70.36	72.53	0.627673	2.27997	24.9	16.04	0.644177	?	?	?	2	tenuous lingual	DB DC well-developped, M absent	absent	absent	?	?	?	?	?	?	7.5	7.5	10	8	10	13	8.33	10.33
563	Giganotosaurus	Giganotosaurus lateral	Carcharodontosauridae	Carcharodontosauridae Lateral	MUCPV-CH-1 L2 small complete	Isolated	carolinii	Hendrickx et al., 2015	Candeleros Member, Río Limay Formation	Vila El Chócon	Neuquén Province	Argentina	Albian-Cenomania	'Middle Cretaceous'	Adult	/	Isolated	Lateral	34.92	14.6	72.6	72.36	0.418099	2.07904	29.73	13.46	0.452741	0	72.36	100	2	well visible labial	well developped everywhere except MA	absent	absent	?	?	?	?	?	?	7.5	9.5	16	9.37	10	16	11	11.79
564	Giganotosaurus	Giganotosaurus lateral	Carcharodontosauridae	Carcharodontosauridae Lateral	MUCPV-CH-1 mesial part of root broken wear facet	Isolated	carolinii	Hendrickx et al., 2015	Candeleros Member, Río Limay Formation	Vila El Chócon	Neuquén Province	Argentina	Albian-Cenomania	'Middle Cretaceous'	Adult	/	Isolated	Lateral	33.24	21.56	70.16	76.02	0.648616	2.11071	25.07	17.08	0.681292	0	76.02	100	2	tenuous close to D	absent	absent	absent	?	?	?	?	?	?	?	?	12.5	8	9	11.25	12.5	9.41
565	Giganotosaurus	Giganotosaurus lateral	Carcharodontosauridae	Carcharodontosauridae Lateral	MUCPV-CH-1 small lateral part of root broken	Isolated	carolinii	Hendrickx et al., 2015	Candeleros Member, Río Limay Formation	Vila El Chócon	Neuquén Province	Argentina	Albian-Cenomania	'Middle Cretaceous'	Adult	/	Isolated	Lateral	27.75	11.77	45.5	50.75	0.4241	1.63964	21.26	9.2	0.432738	0	50.75	100	0	absent	DB well developped	absent	absent	?	?	?	?	?	?	?	10	?	10	10	13	10	11
566	Mapusaurus	Mapusaurus mesial	Carcharodontosauridae	Carcharodontosauridae Mesial	MCF-PVPH-108.166	Isolated (Mesial)	roseae	Hendrickx et al., 2015	Huincul Formation	Cañadón del Gato, Cortaderas area, Plaza Huincul	Neuquén Province	Argentina	Cenomanian	'Middle Cretaceous'	?	/	Isolated (Mesial)	Mesial	21.48	17.31	42.74	40.76	0.805866	1.98976	18.62	13.64	0.732546	?	?	?	?	present at the base, very tenuous adjacent to D	absent?	absent	absent	?	?	?	?	?	?	?	10	12	8.75	11.5	13	11	11.08
567	Mapusaurus	Mapusaurus lateral	Carcharodontosauridae	Carcharodontosauridae Lateral	MCF-PVPH-108.8	Isolated	roseae	Hendrickx et al., 2015	Huincul Formation	Cañadón del Gato, Cortaderas area, Plaza Huincul	Neuquén Province	Argentina	Cenomanian	'Middle Cretaceous'	?	/	Isolated	Lateral	32.97	19.71	65.35	69.76	0.597816	1.9821	25.57	18.09	0.70747	0	69.76	100	3	very well visible adjacent to D	well developped on D, absent on M	absent	absent	?	?	?	?	?	?	8.33	10	12	8.5	?	12	10.11	10.5
568	Mapusaurus	Mapusaurus lateral	Carcharodontosauridae	Carcharodontosauridae Lateral	MCF-PVPH-108.9	Isolated	roseae	Hendrickx et al., 2015	Huincul Formation	Cañadón del Gato, Cortaderas area, Plaza Huincul	Neuquén Province	Argentina	Cenomanian	'Middle Cretaceous'	?	/	Isolated	Lateral	32.6	17.11	74.01	75.71	0.524847	2.27025	28.35	13.68	0.48254	0	75.71	100	3	well visible and very short, adjacent to M	medium to well-developped on both D and M	absent	absent	?	?	?	?	?	?	8.75	10	11.5	10	12.5	13.5	10.08	12
569	Mapusaurus	Mapusaurus lateral	Carcharodontosauridae	Carcharodontosauridae Lateral	MCF-PVPH-108.171	Isolated	roseae	Hendrickx et al., 2015	Huincul Formation	Cañadón del Gato, Cortaderas area, Plaza Huincul	Neuquén Province	Argentina	Cenomanian	'Middle Cretaceous'	?	/	Isolated	Lateral	28.93	15.39	55.1	58.58	0.531974	1.9046	24.74	12.59	0.508892	0	58.58	100	2 to 3	well visible adjacent to D on labial	short to well developped in D, medium in M	absent	absent	?	?	?	?	?	?	8.75	10	14	10	12	13.75	10.91	11.91
570	Mapusaurus	Mapusaurus lateral	Carcharodontosauridae	Carcharodontosauridae Lateral	MCF-PVPH-108.10	Isolated	roseae	Hendrickx et al., 2015	Huincul Formation	Cañadón del Gato, Cortaderas area, Plaza Huincul	Neuquén Province	Argentina	Cenomanian	'Middle Cretaceous'	?	/	Isolated	Lateral	23.92	13.23	40.32	48.77	0.553094	1.68562	21.51	11.54	0.536495	0	48.77	100	~3	very tenous, adjacent to carinae	well developped in D, medium to absent in M	absent	absent	?	?	?	?	?	?	9.16	12	18	10.5	13	15	13.05	12.83
571	Mapusaurus	Mapusaurus lateral	Carcharodontosauridae	Carcharodontosauridae Lateral	MCF-PVPH-108.141	Isolated	roseae	Hendrickx et al., 2015	Huincul Formation	Cañadón del Gato, Cortaderas area, Plaza Huincul	Neuquén Province	Argentina	Cenomanian	'Middle Cretaceous'	?	/	Isolated	Lateral	23.8	12.32	38.66	46.8	0.517647	1.62437	20.04	9.09	0.453593	?	?	?	?	?	?	absent	absent	?	?	?	?	?	?	?	?	?	?	?	?	?	?
572	Mapusaurus	Mapusaurus lateral	Carcharodontosauridae	Carcharodontosauridae Lateral	MCF-PVPH-108.103	Isolated	roseae	Hendrickx et al., 2015	Huincul Formation	Cañadón del Gato, Cortaderas area, Plaza Huincul	Neuquén Province	Argentina	Cenomanian	'Middle Cretaceous'	?	/	Isolated	Lateral	19.77	8.6	22.6	24.89	0.435003	1.14315	18.54	7.86	0.423948	0	24.89	100	4	very well developped on all the crown	medium on M, short on D	absent	absent	?	?	?	?	?	?	10	12	15	11.875	12	16.5	12.33	13.45
573	Bicentenaria	Bicentenaria lateral	Basal Coelurosauria	Basal Coelurosauria	MPCA 866	mx2	argentina	Young et al., 2019 (C.H. pers. measurements)	Candeleros Formation	Shore of Ramos Mexia Lake	Rio Negro Province	Argentina	Cenomanian	'Middle Cretaceous'	Adult?	Right	mx2	Lateral	4.15	?	6.62	7.33	?	1.59518	2.96	1.82	0.614865	2	5.33	72.7149	?	absent	absent	absent	absent	?	?	?	?	?	?	45	37.5	/	30	30	35	40.8	32.5
574	Ornitholestes	Ornitholestes mesial	Basal Coelurosauria	Basal Coelurosauria	AMNH 619	pmx3	hermanni	Young et al., 2019 (C.H. pers. measurements)	Morrison Formation	Bone cabin Quarry, 13 km north of Como Bluff	Wyoming	USA	Kimmeridgian-Tithonian	Late Jurassic	?	Right	pmx3	Mesial	2.96	2.41	6.8	?	0.814189	2.2973	?	?	?	?	?	?	0	absent	absent	absent	absent	?	?	?	?	?	?	?	/	?	?	/	?	/	/
575	Ornitholestes	Ornitholestes lateral	Basal Coelurosauria	Basal Coelurosauria	AMNH 619	mx1	hermanni	Young et al., 2019 (C.H. pers. measurements)	Morrison Formation	Bone cabin Quarry, 13 km north of Como Bluff	Wyoming	USA	Kimmeridgian-Tithonian	Late Jurassic	?	Left	mx1	Lateral	2.61	1.65	4.84	5.46	0.632184	1.85441	?	?	?	?	?	?	0	absent	absent	absent	absent	?	?	?	?	?	?	?	/	?	?	/	?	/	/
576	Ornitholestes	Ornitholestes lateral	Basal Coelurosauria	Basal Coelurosauria	AMNH 619	mx4	hermanni	Young et al., 2019 (C.H. pers. measurements)	Morrison Formation	Bone cabin Quarry, 13 km north of Como Bluff	Wyoming	USA	Kimmeridgian-Tithonian	Late Jurassic	?	Left	mx4	Lateral	3.53	1.85	6.53	6.62	0.524079	1.84986	?	?	?	?	?	?	0	absent	absent	absent	absent	?	?	?	?	?	?	?	?	?	?	50	?	?	50
577	Ornitholestes	Ornitholestes lateral	Basal Coelurosauria	Basal Coelurosauria	AMNH 619	mx6	hermanni	Young et al., 2019 (C.H. pers. measurements)	Morrison Formation	Bone cabin Quarry, 13 km north of Como Bluff	Wyoming	USA	Kimmeridgian-Tithonian	Late Jurassic	?	Left	mx6	Lateral	2.52	1.44	3.86	4.37	0.571429	1.53175	?	?	?	?	?	?	0	absent	absent	absent	absent	?	?	?	?	?	?	?	/	?	?	/	?	/	/
578	Ornitholestes	Ornitholestes lateral	Basal Coelurosauria	Basal Coelurosauria	AMNH 619	mx7	hermanni	Young et al., 2019 (C.H. pers. measurements)	Morrison Formation	Bone cabin Quarry, 13 km north of Como Bluff	Wyoming	USA	Kimmeridgian-Tithonian	Late Jurassic	?	Left	mx7	Lateral	2.14	1.23	3.12	3.65	0.574766	1.45794	?	?	?	?	?	?	0	absent	absent	absent	absent	?	?	?	?	?	?	?	/	?	?	/	?	/	/
579	Ornitholestes	Ornitholestes mesial	Basal Coelurosauria	Basal Coelurosauria	AMNH 619	dt2	hermanni	Young et al., 2019 (C.H. pers. measurements)	Morrison Formation	Bone cabin Quarry, 13 km north of Como Bluff	Wyoming	USA	Kimmeridgian-Tithonian	Late Jurassic	?	Right	dt2	Mesial	2.49	1.91	5.32	4.93	0.767068	2.13655	?	?	?	?	?	?	0	absent	absent	absent	absent	?	?	?	?	?	?	?	?	?	?	?	?	?	?
580	Ornitholestes	Ornitholestes lateral	Basal Coelurosauria	Basal Coelurosauria	AMNH 619	dt5	hermanni	Young et al., 2019 (C.H. pers. measurements)	Morrison Formation	Bone cabin Quarry, 13 km north of Como Bluff	Wyoming	USA	Kimmeridgian-Tithonian	Late Jurassic	?	Right	dt5	Lateral	2.96	2.12	4.87	5.3	0.716216	1.64527	?	?	?	?	?	?	0	absent	absent	absent	absent	?	?	?	?	?	?	?	?	?	?	?	?	?	?
581	Ornitholestes	Ornitholestes lateral	Basal Coelurosauria	Basal Coelurosauria	AMNH 619	dt4	hermanni	Young et al., 2019 (C.H. pers. measurements)	Morrison Formation	Bone cabin Quarry, 13 km north of Como Bluff	Wyoming	USA	Kimmeridgian-Tithonian	Late Jurassic	?	Left	dt4	Lateral	2.48	1.99	5	5.02	0.802419	2.01613	?	?	?	?	?	?	0	absent	absent	absent	absent	?	?	?	?	?	?	?	?	?	?	/	?	?	/
582	Ornitholestes	Ornitholestes lateral	Basal Coelurosauria	Basal Coelurosauria	AMNH 619	dt5	hermanni	Young et al., 2019 (C.H. pers. measurements)	Morrison Formation	Bone cabin Quarry, 13 km north of Como Bluff	Wyoming	USA	Kimmeridgian-Tithonian	Late Jurassic	?	Left	dt5	Lateral	2.93	2.06	5.63	6.16	0.703072	1.9215	?	?	?	?	?	?	0	absent	absent	absent	absent	?	?	?	?	?	?	?	/	?	?	/	?	/	/
583	Ornitholestes	Ornitholestes lateral	Basal Coelurosauria	Basal Coelurosauria	AMNH 619	dt8	hermanni	Young et al., 2019 (C.H. pers. measurements)	Morrison Formation	Bone cabin Quarry, 13 km north of Como Bluff	Wyoming	USA	Kimmeridgian-Tithonian	Late Jurassic	?	Left	dt8	Lateral	2.52	1.54	4.49	4.72	0.611111	1.78175	?	?	?	?	?	?	0	absent	absent	absent	absent	?	?	?	?	?	?	?	?	?	?	60	?	?	60
584	Ornitholestes	Ornitholestes lateral	Basal Coelurosauria	Basal Coelurosauria	AMNH 619	dt9	hermanni	Young et al., 2019 (C.H. pers. measurements)	Morrison Formation	Bone cabin Quarry, 13 km north of Como Bluff	Wyoming	USA	Kimmeridgian-Tithonian	Late Jurassic	?	Left	dt9	Lateral	2.06	1.23	3.89	4.01	0.597087	1.88835	?	?	?	?	?	?	0	absent	absent	absent	absent	?	?	?	?	?	?	?	?	?	?	?	?	?	?
585	Proceratosaurus	Proceratosaurus	Non-tyrannosaurid Tyrannosauroidea	Non-tyrannosaurid Tyrannosauroidea Lateral	BMBH R4860	mx7	bradleyi	Gerke & Wings, 2016	Great Oolite	Minchinhampton	Gloucestershire	U.K.	Late Bathonian	Middle Jurassic	Late juvenile or subadult	Right	mx7	Lateral	6.9	3.5	12.8	14.8	0.507246	1.85507	?	?	?	?	?	?	?	?	?	absent	absent	?	?	?	?	?	?	?	33.75	?	?	22.5	?	?	22.5
586	Proceratosaurus	Proceratosaurus	Non-tyrannosaurid Tyrannosauroidea	Non-tyrannosaurid Tyrannosauroidea Lateral	BMBH R4860	mx4	bradleyi	Gerke & Wings, 2016	Great Oolite	Minchinhampton	Gloucestershire	U.K.	Late Bathonian	Middle Jurassic	Late juvenile or subadult	Left	mx4	Lateral	6.7	3.3	12.6	14.6	0.492537	1.8806	?	?	?	?	?	?	?	?	?	absent	absent	?	?	?	?	?	?	?	33.75	?	?	26.25	?	?	26.25
587	Proceratosaurus	Proceratosaurus	Non-tyrannosaurid Tyrannosauroidea	Non-tyrannosaurid Tyrannosauroidea Lateral	BMBH R4860	mx8	bradleyi	Gerke & Wings, 2016	Great Oolite	Minchinhampton	Gloucestershire	U.K.	Late Bathonian	Middle Jurassic	Late juvenile or subadult	Left	mx8	Lateral	6.7	3.4	12.2	14.1	0.507463	1.8209	?	?	?	?	?	?	?	?	?	absent	absent	?	?	?	?	?	?	?	30	?	?	25	?	?	25
588	Proceratosaurus	Proceratosaurus	Non-tyrannosaurid Tyrannosauroidea	Non-tyrannosaurid Tyrannosauroidea Lateral	BMBH R4860	mx9	bradleyi	Gerke & Wings, 2016	Great Oolite	Minchinhampton	Gloucestershire	U.K.	Late Bathonian	Middle Jurassic	Late juvenile or subadult	Left	mx9	Lateral	6.4	3.3	11.2	13.4	0.515625	1.75	?	?	?	?	?	?	?	?	?	absent	absent	?	?	?	?	?	?	?	30	?	?	25	?	?	25
589	Proceratosaurus	Proceratosaurus	Non-tyrannosaurid Tyrannosauroidea	Non-tyrannosaurid Tyrannosauroidea Mesial	BMBH R4860	dt3	bradleyi	Gerke & Wings, 2016	Great Oolite	Minchinhampton	Gloucestershire	U.K.	Late Bathonian	Middle Jurassic	Late juvenile or subadult	Right	dt3	Mesial	3.5	2.9	6.5	7.1	0.828571	1.85714	?	?	?	?	?	?	?	?	?	absent	absent	?	?	?	?	?	?	?	33.75	?	?	26.25	?	?	26.25
590	Proceratosaurus	Proceratosaurus	Non-tyrannosaurid Tyrannosauroidea	Non-tyrannosaurid Tyrannosauroidea Lateral	BMBH R4860	dt4	bradleyi	Gerke & Wings, 2016	Great Oolite	Minchinhampton	Gloucestershire	U.K.	Late Bathonian	Middle Jurassic	Late juvenile or subadult	Right	dt4	Lateral	4.4	3.1	9	9.9	0.704545	2.04545	?	?	?	?	?	?	?	?	?	absent	absent	?	?	?	?	?	?	?	37.5	?	?	26.25	?	?	26.25
591	Proceratosaurus	Proceratosaurus	Non-tyrannosaurid Tyrannosauroidea	Non-tyrannosaurid Tyrannosauroidea Lateral	BMBH R4860	dt8	bradleyi	Gerke & Wings, 2016	Great Oolite	Minchinhampton	Gloucestershire	U.K.	Late Bathonian	Middle Jurassic	Late juvenile or subadult	Right	dt8	Lateral	5.4	3.4	9.3	11.3	0.62963	1.72222	?	?	?	?	?	?	?	?	?	absent	absent	?	?	?	?	?	?	?	37.5	?	?	26.25	?	37.5	26.25
592	Proceratosaurus	Proceratosaurus	Non-tyrannosaurid Tyrannosauroidea	Non-tyrannosaurid Tyrannosauroidea Lateral	BMBH R4860	dt5	bradleyi	Gerke & Wings, 2016	Great Oolite	Minchinhampton	Gloucestershire	U.K.	Late Bathonian	Middle Jurassic	Late juvenile or subadult	Left	dt5	Lateral	5.4	3.5	11	12.2	0.648148	2.03704	?	?	?	?	?	?	?	?	?	absent	absent	?	?	?	?	?	?	?	33.75	?	?	26.25	?	?	26.25
593	Proceratosaurus	Proceratosaurus	Non-tyrannosaurid Tyrannosauroidea	Non-tyrannosaurid Tyrannosauroidea Lateral	BMBH R4860	dt7	bradleyi	Gerke & Wings, 2016	Great Oolite	Minchinhampton	Gloucestershire	U.K.	Late Bathonian	Middle Jurassic	Late juvenile or subadult	Left	dt7	Lateral	5.6	3.4	10.2	11.6	0.607143	1.82143	?	?	?	?	?	?	?	?	?	absent	absent	?	?	?	?	?	?	?	33.75	?	?	26.25	?	?	26.25
594	Guanlong	Guanlong mesial	Non-tyrannosaurid Tyrannosauroidea	Non-tyrannosaurid Tyrannosauroidea Mesial	IVPP V14531	pmx1	wucaii	This study	Shishugou Formation	Wucaiwan area, Junggar Basin	Xinjiang	China	Oxfordian	Late Jurassic	Old adult (12 yo)	Left	pmx1	Mesial	4.54	5.65	8.9	10.32	1.24449	1.96035	?	?	?	?	?	?	?	?	?	absent	absent	?	?	?	?	?	?		13.75			13.33
595	Guanlong	Guanlong mesial	Non-tyrannosaurid Tyrannosauroidea	Non-tyrannosaurid Tyrannosauroidea Mesial	IVPP V14531	pmx3	wucaii	This study	Shishugou Formation	Wucaiwan area, Junggar Basin	Xinjiang	China	Oxfordian	Late Jurassic	Old adult (12 yo)	Left	pmx3	Mesial	6.82	5.04	12.19	15.16	0.739003	1.78739	?	?	?	?	?	?	?	?	?	absent	absent	?	?	?	?	?	?		?			13
596	Guanlong	Guanlong lateral	Non-tyrannosaurid Tyrannosauroidea	Non-tyrannosaurid Tyrannosauroidea Lateral	IVPP V14531	mx2	wucaii	This study	Shishugou Formation	Wucaiwan area, Junggar Basin	Xinjiang	China	Oxfordian	Late Jurassic	Old adult (12 yo)	Left	mx2	Lateral	9.34	4.92	17.58	20.11	0.526767	1.88223	?	?	?	?	?	?	?	?	?	absent	absent	?	?	?	?	?	?		?			16.25
597	Guanlong	Guanlong lateral	Non-tyrannosaurid Tyrannosauroidea	Non-tyrannosaurid Tyrannosauroidea Lateral	IVPP V14531	mx3	wucaii	This study	Shishugou Formation	Wucaiwan area, Junggar Basin	Xinjiang	China	Oxfordian	Late Jurassic	Old adult (12 yo)	Left	mx3	Lateral	8.84	4.81	15.31	19.92	0.544118	1.7319	?	?	?	?	?	?	?	?	?	absent	absent	?	?	?	?	?	?	20	?			16.66
598	Guanlong	Guanlong lateral	Non-tyrannosaurid Tyrannosauroidea	Non-tyrannosaurid Tyrannosauroidea Lateral	IVPP V14531	mx6	wucaii	This study	Shishugou Formation	Wucaiwan area, Junggar Basin	Xinjiang	China	Oxfordian	Late Jurassic	Old adult (12 yo)	Left	mx6	Lateral	8.46	4.63	14.17	16.88	0.547281	1.67494	?	?	?	?	?	?	?	?	?	absent	absent	?	?	?	?	?	?	?	?	?	?	?	?	?	?
599	Guanlong	Guanlong lateral	Non-tyrannosaurid Tyrannosauroidea	Non-tyrannosaurid Tyrannosauroidea Lateral	IVPP V14531	mx7	wucaii	This study	Shishugou Formation	Wucaiwan area, Junggar Basin	Xinjiang	China	Oxfordian	Late Jurassic	Old adult (12 yo)	Left	mx7	Lateral	8.74	3.97	12.3	16.31	0.454233	1.40732	?	?	?	?	?	?	?	?	?	absent	absent	?	?	?	?	?	?	18.75	?	?	18.75	20	22.5
600	Dilong	Dilong mesial	Non-tyrannosaurid Tyrannosauroidea	Non-tyrannosaurid Tyrannosauroidea Mesial	IVPP 14242	pmx1	paradoxus	This study	lower part of the Yixian Formation	Lujiatun, Beipiao	western Liaoning	China	Oxfordian	Late Jurassic	Immature (juvenile)	Left	pmx1	Mesial	1.38	1.75	4.77	4.9	1.26812	3.45652	?	?	?	?	?	?	?	?	?	absent	absent	?	?	?	?	?	?		?			33
601	Dilong	Dilong lateral	Non-tyrannosaurid Tyrannosauroidea	Non-tyrannosaurid Tyrannosauroidea Lateral	IVPP 14242	largest mx	paradoxus	This study	lower part of the Yixian Formation	Lujiatun, Beipiao	western Liaoning	China	Oxfordian	Late Jurassic	Immature (juvenile)	Left	largest mx	Lateral	3.78	1.79	7	7.5	0.473545	1.85185	?	?	?	?	?	?	?	?	?	absent	absent	?	?	?	?	?	?	?	30	/		27.5
602	Dilong	Dilong lateral	Non-tyrannosaurid Tyrannosauroidea	Non-tyrannosaurid Tyrannosauroidea Lateral	IVPP 14242	distalmost	paradoxus	This study	lower part of the Yixian Formation	Lujiatun, Beipiao	western Liaoning	China	Oxfordian	Late Jurassic	Immature (juvenile)	Left	distalmost	Lateral	2.88	1.33	4.82	5.12	0.461806	1.67361	?	?	?	?	?	?	?	?	?	absent	absent	?	?	?	?	?	?	35	/	/		27.5
603	Dilong	Dilong lateral	Non-tyrannosaurid Tyrannosauroidea	Non-tyrannosaurid Tyrannosauroidea Lateral	IVPP 14242	mx1	paradoxus	This study	lower part of the Yixian Formation	Lujiatun, Beipiao	western Liaoning	China	Oxfordian	Late Jurassic	Immature (juvenile)	Right	mx1	Lateral	2.64	1.88	5.19	5.77	0.712121	1.96591	?	?	?	?	?	?	?	?	?	absent	absent	?	?	?	?	?	?	?	/	/		28.75
604	Dilong	Dilong lateral	Non-tyrannosaurid Tyrannosauroidea	Non-tyrannosaurid Tyrannosauroidea Lateral	IVPP 14242	mx2	paradoxus	This study	lower part of the Yixian Formation	Lujiatun, Beipiao	western Liaoning	China	Oxfordian	Late Jurassic	Immature (juvenile)	Right	mx2	Lateral	2.68	2.16	7.3	7.19	0.80597	2.72388	?	?	?	?	?	?	?	?	?	12	?	?	?	?	?	?	?	?	/	/		27.5
605	Dilong	Dilong lateral	Non-tyrannosaurid Tyrannosauroidea	Non-tyrannosaurid Tyrannosauroidea Lateral	IVPP 14242	mx4	paradoxus	This study	lower part of the Yixian Formation	Lujiatun, Beipiao	western Liaoning	China	Oxfordian	Late Jurassic	Immature (juvenile)	Right	mx4	Lateral	3.53	2.36	7.26	8.29	0.668555	2.05666	?	?	?	?	?	?	?	?	?	13	?	?	?	?	?	?	?	?	/	/		27.5
606	Dilong	Dilong lateral	Non-tyrannosaurid Tyrannosauroidea	Non-tyrannosaurid Tyrannosauroidea Lateral	IVPP 14242	mx7	paradoxus	This study	lower part of the Yixian Formation	Lujiatun, Beipiao	western Liaoning	China	Oxfordian	Late Jurassic	Immature (juvenile)	Right	mx7	Lateral	3.3	1.74	6.05	7.28	0.527273	1.83333	?	?	?	?	?	?	?	?	?	absent	absent	?	?	?	?	?	?	34.28	34.28	/		26
607	Dilong	Dilong lateral	Non-tyrannosaurid Tyrannosauroidea	Non-tyrannosaurid Tyrannosauroidea Lateral	IVPP 14242	dt8	paradoxus	This study	lower part of the Yixian Formation	Lujiatun, Beipiao	western Liaoning	China	Oxfordian	Late Jurassic	Immature (juvenile)	Left	dt8	Lateral	2.8	1.39	5.8	6.37	0.496429	2.07143	?	?	?	?	?	?	?	?	?	absent	absent	?	?	?	?	?	?		?	/		25
608	Dilong	Dilong lateral	Non-tyrannosaurid Tyrannosauroidea	Non-tyrannosaurid Tyrannosauroidea Lateral	IVPP 14242	dt2	paradoxus	This study	lower part of the Yixian Formation	Lujiatun, Beipiao	western Liaoning	China	Oxfordian	Late Jurassic	Immature (juvenile)	Right	dt2	Lateral	2.57	1.98	4.65	5.87	0.770428	1.80934	?	?	?	?	?	?	?	?	?	absent	absent	?	?	?	?	?	?		?	/		27.5
609	Dilong	Dilong lateral	Non-tyrannosaurid Tyrannosauroidea	Non-tyrannosaurid Tyrannosauroidea Lateral	IVPP 14242	dt4	paradoxus	This study	lower part of the Yixian Formation	Lujiatun, Beipiao	western Liaoning	China	Oxfordian	Late Jurassic	Immature (juvenile)	Right	dt4	Lateral	2.92	1.63	5.84	6.93	0.558219	2	?	?	?	?	?	?	?	?	?	absent	absent	?	?	?	?	?	?		/	/		25
610	Dilong	Dilong lateral	Non-tyrannosaurid Tyrannosauroidea	Non-tyrannosaurid Tyrannosauroidea Lateral	IVPP 14242	dt9	paradoxus	This study	lower part of the Yixian Formation	Lujiatun, Beipiao	western Liaoning	China	Oxfordian	Late Jurassic	Immature (juvenile)	Right	dt9	Lateral	2.88	1.34	4.16	4.86	0.465278	1.44444	?	?	?	?	?	?	?	?	?	absent	absent	?	?	?	?	?	?	?	?	/		24
611	Dilong	Dilong mesial	Non-tyrannosaurid Tyrannosauroidea	Non-tyrannosaurid Tyrannosauroidea Mesial	IVPP 14243	pmx2	paradoxus	This study	lower part of the Yixian Formation	Lujiatun, Beipiao	western Liaoning	China	Oxfordian	Late Jurassic	Immature approaching maturity	Right	pmx2	Mesial	1.7	2.2	4.8	5.68	1.29412	2.82353	?	?	?	?	?	?	?	?	?	absent	absent	?	?	?	?	?	?		22.5			22.5
612	Dilong	Dilong mesial	Non-tyrannosaurid Tyrannosauroidea	Non-tyrannosaurid Tyrannosauroidea Mesial	IVPP 14243	pmx3	paradoxus	This study	lower part of the Yixian Formation	Lujiatun, Beipiao	western Liaoning	China	Oxfordian	Late Jurassic	Immature approaching maturity	Right	pmx3	Mesial	1.55	2.09	5.46	?	1.34839	3.52258	?	?	?	?	?	?	?	?	?	absent	absent	?	?	?	?	?	?		?			?
613	Eotyrannus	Eotyrannus	Non-tyrannosaurid Tyrannosauroidea	Non-tyrannosaurid Tyrannosauroidea Mesial	MIWG 1997.550	Isolated pmx (clean, nice)	lengi	Hendrickx et al., 2015	Wessex Formation, Wealden Group	Southwest coast of the Isle of Wight	Isle of Wight	U.K.	Barremian?	Early Cretaceous	Immature (juvenile)	/	Isolated pmx (clean, nice)	Mesial	5.73	6.95	14.77	14.74	1.21291	2.57766	4.56	5.38	1.17982	0	14.74	100	0	absent	D, short	absent	absent	?	?	?	?	?	?	17	15	20	17	14.16	17.5	17.33	16.22
614	Raptorex	Raptorex mesial	Non-tyrannosaurid Tyrannosauroidea	Non-tyrannosaurid Tyrannosauroidea Mesial	LH PV18	pmx1	kriegsteini	Hendrickx et al., 2015	Lujiatun Beds, Yixian Formation	Liaoning Province	Nei Mongol Autonomous Region	China	Hauterivian-Barremian	Early Cretaceous	Immature (juvenile)	Right	pmx1	Mesial	2.5	4.2	6.8	7.1	1.68	2.72	2.7	2.6	0.962963	0	7.1	0	0	absent	?	absent	absent	?	?	?	?	?	?	?	20	20	?	18	18	20	18
615	Raptorex	Raptorex mesial	Non-tyrannosaurid Tyrannosauroidea	Non-tyrannosaurid Tyrannosauroidea Mesial	LH PV18	pmx3	kriegsteini	Hendrickx et al., 2015	Lujiatun Beds, Yixian Formation	Liaoning Province	Nei Mongol Autonomous Region	China	Hauterivian-Barremian	Early Cretaceous	Immature (juvenile)	Right	pmx3	Mesial	3.5	5	9	9	1.42857	2.57143	3.5	3.2	0.914286	0	9	0	0	absent	?	absent	absent	?	?	?	?	?	?	?	19	20	?	17	20	19.5	18.5
616	Raptorex	Raptorex mesial	Non-tyrannosaurid Tyrannosauroidea	Non-tyrannosaurid Tyrannosauroidea Mesial	LH PV18	pmx4	kriegsteini	Hendrickx et al., 2015	Lujiatun Beds, Yixian Formation	Liaoning Province	Nei Mongol Autonomous Region	China	Hauterivian-Barremian	Early Cretaceous	Immature (juvenile)	Right	pmx4	Mesial	3.5	4.6	8.8	7.6	1.31429	2.51429	3.3	3	0.909091	0	7.6	0	0	absent	?	absent	absent	?	?	?	?	?	?	20	20	?	18	17.5	?	20	17.75
617	Raptorex	Raptorex mesial	Non-tyrannosaurid Tyrannosauroidea	Non-tyrannosaurid Tyrannosauroidea Mesial	LH PV18	Isolated7 (pxm)	kriegsteini	Hendrickx et al., 2015	Lujiatun Beds, Yixian Formation	Liaoning Province	Nei Mongol Autonomous Region	China	Hauterivian-Barremian	Early Cretaceous	Immature (juvenile)	/	Isolated7 (pxm)	Mesial	2.7	4.6	9.4	9.5	1.7037	3.48148	2	2.5	1.25	0	9.5	0	?	?	?	absent	absent	?	?	?	?	?	?	?	?	?	17	17.5	18	?	17.75
618	Raptorex	Raptorex lateral	Non-tyrannosaurid Tyrannosauroidea	Non-tyrannosaurid Tyrannosauroidea Lateral	LH PV18	mx2	kriegsteini	Hendrickx et al., 2015	Lujiatun Beds, Yixian Formation	Liaoning Province	Nei Mongol Autonomous Region	China	Hauterivian-Barremian	Early Cretaceous	Immature (juvenile)	Left	mx2	Lateral	9.5	4.8	16.8	20	0.505263	1.76842	6.9	4.3	0.623188	0	20	0	7	?	?	absent	absent	?	?	?	?	?	?	?	18	?	?	14	15	18	14.5
619	Raptorex	Raptorex lateral	Non-tyrannosaurid Tyrannosauroidea	Non-tyrannosaurid Tyrannosauroidea Lateral	LH PV18	mx6	kriegsteini	Hendrickx et al., 2015	Lujiatun Beds, Yixian Formation	Liaoning Province	Nei Mongol Autonomous Region	China	Hauterivian-Barremian	Early Cretaceous	Immature (juvenile)	Left	mx6	Lateral	9.8	4.2	19.4	22.3	0.428571	1.97959	7.2	3.5	0.486111	1.6	20.7	92.8251	7	?	?	absent	absent	?	?	?	?	?	?	?	18.33	?	?	16	?	18.33	16
620	Raptorex	Raptorex lateral	Non-tyrannosaurid Tyrannosauroidea	Non-tyrannosaurid Tyrannosauroidea Lateral	LH PV18	mx8	kriegsteini	Hendrickx et al., 2015	Lujiatun Beds, Yixian Formation	Liaoning Province	Nei Mongol Autonomous Region	China	Hauterivian-Barremian	Early Cretaceous	Immature (juvenile)	Left	mx8	Lateral	9.8	3.8	18.7	19.9	0.387755	1.90816	8	3.6	0.45	?	?	?	>6	?	?	absent	absent	?	?	?	?	?	?	?	?	?	?	?	25	?	25
621	Raptorex	Raptorex lateral	Non-tyrannosaurid Tyrannosauroidea	Non-tyrannosaurid Tyrannosauroidea Lateral	LH PV18	mx10	kriegsteini	Hendrickx et al., 2015	Lujiatun Beds, Yixian Formation	Liaoning Province	Nei Mongol Autonomous Region	China	Hauterivian-Barremian	Early Cretaceous	Immature (juvenile)	Left	mx10	Lateral	8.1	3.3	10	11.3	0.407407	1.23457	4.8	2.4	0.5	0	11.3	100	2/1 mm	?	?	absent	absent	?	?	?	?	?	?	20	18	?	18.75	18.5	?	19	18.6
622	Raptorex	Raptorex lateral	Non-tyrannosaurid Tyrannosauroidea	Non-tyrannosaurid Tyrannosauroidea Lateral	LH PV18	dt5	kriegsteini	Hendrickx et al., 2015	Lujiatun Beds, Yixian Formation	Liaoning Province	Nei Mongol Autonomous Region	China	Hauterivian-Barremian	Early Cretaceous	Immature (juvenile)	Right	dt5	Lateral	7.4	3.4	11	13.5	0.459459	1.48649	6.1	3.2	0.52459	0	13.5	100	3/2 mm	?	?	absent	absent	?	?	?	?	?	?	?	19	?	?	20	?	19	20
623	Raptorex	Raptorex lateral	Non-tyrannosaurid Tyrannosauroidea	Non-tyrannosaurid Tyrannosauroidea Lateral	LH PV18	dt8	kriegsteini	Hendrickx et al., 2015	Lujiatun Beds, Yixian Formation	Liaoning Province	Nei Mongol Autonomous Region	China	Hauterivian-Barremian	Early Cretaceous	Immature (juvenile)	Right	dt8	Lateral	9.6	3.8	14.3	17.4	0.395833	1.48958	8	3.6	0.45	0	17.4	100	?	?	?	absent	absent	?	?	?	?	?	?	?	20	/	?	18.33	?	20	18.33
624	Raptorex	Raptorex lateral	Non-tyrannosaurid Tyrannosauroidea	Non-tyrannosaurid Tyrannosauroidea Lateral	LH PV18	dt9	kriegsteini	Hendrickx et al., 2015	Lujiatun Beds, Yixian Formation	Liaoning Province	Nei Mongol Autonomous Region	China	Hauterivian-Barremian	Early Cretaceous	Immature (juvenile)	Right	dt9	Lateral	8.9	3.1	14	14.5	0.348315	1.57303	?	?	?	3	11.5	79.3103	?	?	?	absent	absent	?	?	?	?	?	?	?	19	?	17	18	?	19	17.5
625	Raptorex	Raptorex lateral	Non-tyrannosaurid Tyrannosauroidea	Non-tyrannosaurid Tyrannosauroidea Lateral	LH PV18	Isolated1	kriegsteini	Hendrickx et al., 2015	Lujiatun Beds, Yixian Formation	Liaoning Province	Nei Mongol Autonomous Region	China	Hauterivian-Barremian	Early Cretaceous	Immature (juvenile)	/	Isolated1	Lateral	10.7	4	19.1	20.3	0.373832	1.78505	7.6	4.1	0.539474	0	20.3	100	?	?	?	absent	absent	?	?	?	?	?	?		15.5			15
626	Raptorex	Raptorex lateral	Non-tyrannosaurid Tyrannosauroidea	Non-tyrannosaurid Tyrannosauroidea Lateral	LH PV18	Isolated2	kriegsteini	Hendrickx et al., 2015	Lujiatun Beds, Yixian Formation	Liaoning Province	Nei Mongol Autonomous Region	China	Hauterivian-Barremian	Early Cretaceous	Immature (juvenile)	/	Isolated2	Lateral	10.3	4.7	21.2	23.8	0.456311	2.05825	7.1	3.7	0.521127	0	23.8	100	?	?	?	absent	absent	?	?	?	?	?	?		16.5			17
627	Raptorex	Raptorex lateral	Non-tyrannosaurid Tyrannosauroidea	Non-tyrannosaurid Tyrannosauroidea Lateral	LH PV18	Isolated3	kriegsteini	Hendrickx et al., 2015	Lujiatun Beds, Yixian Formation	Liaoning Province	Nei Mongol Autonomous Region	China	Hauterivian-Barremian	Early Cretaceous	Immature (juvenile)	/	Isolated3	Lateral	8	4.9	18.8	18	0.6125	2.35	6.1	3.9	0.639344	0	18	100	?	?	?	absent	absent	?	?	?	?	?	?		16			15.5
628	Raptorex	Raptorex lateral	Non-tyrannosaurid Tyrannosauroidea	Non-tyrannosaurid Tyrannosauroidea Lateral	LH PV18	Isolated4	kriegsteini	Hendrickx et al., 2015	Lujiatun Beds, Yixian Formation	Liaoning Province	Nei Mongol Autonomous Region	China	Hauterivian-Barremian	Early Cretaceous	Immature (juvenile)	/	Isolated4	Lateral	9	3.6	13.4	19	0.4	1.48889	5.8	3.1	0.534483	?	?	?	?	?	?	absent	absent	?	?	?	?	?	?		?			16.66
629	Raptorex	Raptorex lateral	Non-tyrannosaurid Tyrannosauroidea	Non-tyrannosaurid Tyrannosauroidea Lateral	LH PV18	Isolated5	kriegsteini	Hendrickx et al., 2015	Lujiatun Beds, Yixian Formation	Liaoning Province	Nei Mongol Autonomous Region	China	Hauterivian-Barremian	Early Cretaceous	Immature (juvenile)	/	Isolated5	Lateral	7	4.2	14.2	16.4	0.6	2.02857	5.2	3.2	0.615385	0	16.4	100	?	?	?	absent	absent	?	?	?	?	?	?		18			15
630	Raptorex	Raptorex lateral	Non-tyrannosaurid Tyrannosauroidea	Non-tyrannosaurid Tyrannosauroidea Lateral	LH PV18	Isolated6	kriegsteini	Hendrickx et al., 2015	Lujiatun Beds, Yixian Formation	Liaoning Province	Nei Mongol Autonomous Region	China	Hauterivian-Barremian	Early Cretaceous	Immature (juvenile)	/	Isolated6	Lateral	8.7	3	12	14.6	0.344828	1.37931	5.9	2.7	0.457627	0	14.6	100	?	?	?	absent	absent	?	?	?	?	?	?		18			18.5
631	Alioramus	Alioramus lateral	Tyrannosauridae	Tyrannosauridae Lateral	IGM 100/1844	dt7	altai	Hendrickx et al., 2015	Nemegt Formation	Tsaggan Khuushuu	Gobi desert	Mongolia	Maastrichtian	Late Cretaceous	Immature (young)	Left	dt7	Lateral	12.44	6.7	22.85	24.35	0.538585	1.83682	10.61	5.3	0.499529	6.94	17.41	71.499	4/5 mm	visible on the lingual side	absent	absent	absent	?	?	?	?	?	?		14			13.5
632	Alioramus	Alioramus lateral	Tyrannosauridae	Tyrannosauridae Lateral	IGM 100/1844	dt13	altai	Hendrickx et al., 2015	Nemegt Formation	Tsaggan Khuushuu	Gobi desert	Mongolia	Maastrichtian	Late Cretaceous	Immature (young)	Left	dt13	Lateral	11.98	6	18.66	22.14	0.500835	1.5576	9.2	4.24	0.46087	2.71	19.43	87.7597	4/3 mm	well visible lingual side	absent	absent	absent	?	?	?	?	?	?		14.5			15
633	Alioramus	Alioramus lateral	Tyrannosauridae	Tyrannosauridae Lateral	IGM 100/1844	dt14	altai	Hendrickx et al., 2015	Nemegt Formation	Tsaggan Khuushuu	Gobi desert	Mongolia	Maastrichtian	Late Cretaceous	Immature (young)	Left	dt14	Lateral	11.99	5.59	18.2	22.77	0.466222	1.51793	10.29	4.96	0.482021	?	?	?	6/5 mm	well visible lingual side	absent	absent	absent	?	?	?	?	?	?		15			15
634	Alioramus	Alioramus lateral	Tyrannosauridae	Tyrannosauridae Lateral	IGM 100/1844	mx03	altai	Young et al., 2019 (C.H. pers. measurements)	Nemegt Formation	Tsaggan Khuushuu	Gobi desert	Mongolia	Maastrichtian	Late Cretaceous	Immature (young)	Right	mx03	Lateral	13.68	7.86	34.08	35.1	0.574561	2.49123	9.75	6.02	0.617436	5.36	29.74	84.7293	5/5mm	well visible on both sides	absent	absent	absent	?	?	?	?	?	?		13.5			13.5
635	Alioramus	Alioramus lateral	Tyrannosauridae	Tyrannosauridae Lateral	IGM 100/1844	mx05	altai	Hendrickx et al., 2015	Nemegt Formation	Tsaggan Khuushuu	Gobi desert	Mongolia	Maastrichtian	Late Cretaceous	Immature (young)	Right	mx05	Lateral	18.03	8.38	39.84	37.37	0.464781	2.20965	12.78	7.06	0.552426	3.2	34.17	91.437	5/5mm	well visible on both sides	absent	absent	absent	?	?	?	?	?	?		13.5			13
636	Alioramus	Alioramus lateral	Tyrannosauridae	Tyrannosauridae Lateral	IGM 100/1844	mx07	altai	Hendrickx et al., 2015	Nemegt Formation	Tsaggan Khuushuu	Gobi desert	Mongolia	Maastrichtian	Late Cretaceous	Immature (young)	Right	mx07	Lateral	16.63	6.25	31.71	31.46	0.375827	1.90679	12.7	6.04	0.475591	2.11	29.35	93.2931	5/5mm	well visible on both sides	absent	absent	absent	?	?	?	?	?	?		13.5			14
637	Alioramus	Alioramus lateral	Tyrannosauridae	Tyrannosauridae Lateral	IGM 100/1844	mx09	altai	Hendrickx et al., 2015	Nemegt Formation	Tsaggan Khuushuu	Gobi desert	Mongolia	Maastrichtian	Late Cretaceous	Immature (young)	Right	mx09	Lateral	15.81	5.99	26.49	26.79	0.378874	1.67552	12.16	5.35	0.439967	4.14	22.65	84.5465	5/5mm	well visible on both sides	absent	absent	absent	?	?	?	?	?	?		15			14
638	Alioramus	Alioramus lateral	Tyrannosauridae	Tyrannosauridae Lateral	IGM 100/1844	mx11	altai	Hendrickx et al., 2015	Nemegt Formation	Tsaggan Khuushuu	Gobi desert	Mongolia	Maastrichtian	Late Cretaceous	Immature (young)	Right	mx11	Lateral	15.48	5.81	24.21	25.49	0.375323	1.56395	12.34	5.411	0.438493	3.72	21.77	85.406	?	?	absent	absent	absent	?	?	?	?	?	?		15			16
639	Alioramus	Alioramus lateral	Tyrannosauridae	Tyrannosauridae Lateral	IGM 100/1844	mx13	altai	Hendrickx et al., 2015	Nemegt Formation	Tsaggan Khuushuu	Gobi desert	Mongolia	Maastrichtian	Late Cretaceous	Immature (young)	Right	mx13	Lateral	12.66	4.92	19.85	26.07	0.388626	1.56793	9.55	4.51	0.472251	8.37	17.7	67.8941	?	?	absent	absent	absent	?	?	?	?	?	?		15			16
640	Alioramus	Alioramus lateral	Tyrannosauridae	Tyrannosauridae Lateral	IGM 100/1844	mx14	altai	Hendrickx et al., 2015	Nemegt Formation	Tsaggan Khuushuu	Gobi desert	Mongolia	Maastrichtian	Late Cretaceous	Immature (young)	Right	mx14	Lateral	10.92	4.6	16.09	18.15	0.421245	1.47344	8.88	3.97	0.447072	3.9	14.25	78.5124	?	?	absent	absent	absent	?	?	?	?	?	?		16			15
641	Alioramus	Alioramus lateral	Tyrannosauridae	Tyrannosauridae Lateral	IGM 100/1844	Isolated1	altai	Hendrickx et al., 2015	Nemegt Formation	Tsaggan Khuushuu	Gobi desert	Mongolia	Maastrichtian	Late Cretaceous	Immature (young)	/	Isolated1	Lateral	13.45	6.74	23.44	24.88	0.501115	1.74275	10.46	5.86	0.560229	4.41	20.47	82.2749	6/5mm	well visible on both sides	absent	absent	absent	?	?	?	?	?	?		15			14
642	Alioramus	Alioramus lateral	Tyrannosauridae	Tyrannosauridae Lateral	IGM 100/1844	Isolated2	altai	Hendrickx et al., 2015	Nemegt Formation	Tsaggan Khuushuu	Gobi desert	Mongolia	Maastrichtian	Late Cretaceous	Immature (young)	/	Isolated2	Lateral	12.1	7.19	25.84	26.01	0.594215	2.13554	9.03	5.83	0.645626	4.45	21.56	82.8912	6/5mm	well visible on both sides	absent	absent	absent	?	?	?	?	?	?		15			13.5
643	Alioramus	Alioramus lateral	Tyrannosauridae	Tyrannosauridae Lateral	IGM 100/1844	Isolated3	altai	Hendrickx et al., 2015	Nemegt Formation	Tsaggan Khuushuu	Gobi desert	Mongolia	Maastrichtian	Late Cretaceous	Immature (young)	/	Isolated3	Lateral	13.12	5.6	22.97	24.29	0.426829	1.75076	10.17	5.34	0.525074	3.73	20.56	84.6439	6/5mm	well visible on both sides	D short	absent	absent	?	?	?	?	?	?		17			16
644	Alioramus	Alioramus lateral	Tyrannosauridae	Tyrannosauridae Lateral	IGM 100/1844	Isolated4	altai	Hendrickx et al., 2015	Nemegt Formation	Tsaggan Khuushuu	Gobi desert	Mongolia	Maastrichtian	Late Cretaceous	Immature (young)	/	Isolated4	Lateral	12.46	5.49	20.39	24.47	0.44061	1.63644	9.91	4.8	0.484359	3.63	20.84	85.1655	3/3mm	well visible on both sides	absent	absent	absent	?	?	?	?	?	?		15.5			16
645	Alioramus	Alioramus lateral	Tyrannosauridae	Tyrannosauridae Lateral	IGM 100/1844	Isolated5	altai	Hendrickx et al., 2015	Nemegt Formation	Tsaggan Khuushuu	Gobi desert	Mongolia	Maastrichtian	Late Cretaceous	Immature (young)	/	Isolated5	Lateral	12.29	5.49	19.74	20.77	0.446705	1.60618	9.85	4.9	0.497462	2.83	17.94	86.3746	6/5mm	well visible on both sides	absent	absent	absent	?	?	?	?	?	?		17			14
646	Alioramus	Alioramus lateral	Tyrannosauridae	Tyrannosauridae Lateral	IGM 100/1844	Isolated6	altai	Hendrickx et al., 2015	Nemegt Formation	Tsaggan Khuushuu	Gobi desert	Mongolia	Maastrichtian	Late Cretaceous	Immature (young)	/	Isolated6	Lateral	9.55	4.54	13.01	15.87	0.475393	1.3623	8.08	3.97	0.491337	2.01	13.86	87.3346	3/2,5mm	visible on both sides	absent	absent	absent	?	?	?	?	?	?		18			19
647	Gorgosaurus	Gorgosaurus mesial	Tyrannosauridae	Tyrannosauridae Mesial	ROM 1247	d02	libratus	Smith et al., 2005	Dinosaur Park Formation	Dinosaur Provincial Park	Alberta	U.S.	Late Campanian	Late Cretaceous	Immature (young); Stage 1	Right	d02	Mesial	12.4	11.6	25.53	25.99	0.935484	2.05887	?	?	?	?	?	?	?	?	?	?	?	?	?	?	?	81.52	0.16	/	?	15	12.8	11	12	15	11.9
648	Gorgosaurus	Gorgosaurus mesial	Tyrannosauridae	Tyrannosauridae Mesial	ROM 1247	d03	libratus	Smith et al., 2005	Dinosaur Park Formation	Dinosaur Provincial Park	Alberta	U.S.	Late Campanian	Late Cretaceous	Immature (young); Stage 1	Right	d03	Mesial	17.82	14.25	42.21	42.39	0.799663	2.36869	?	?	?	?	?	?	?	?	?	?	?	?	?	?	?	84.95	0.15	10.5	10	12	12	12.5	15.2	10.8	13.2
649	Gorgosaurus	Gorgosaurus lateral	Tyrannosauridae	Tyrannosauridae Lateral	ROM 1247	d04	libratus	Smith et al., 2005	Dinosaur Park Formation	Dinosaur Provincial Park	Alberta	U.S.	Late Campanian	Late Cretaceous	Immature (young); Stage 1	Right	d04	Lateral	21.28	10.77	39.68	45.91	0.506109	1.86466	?	?	?	?	?	?	?	?	?	?	?	?	?	?	?	84.03	0.02	/	12	12.5	11.5	11	12.8	12.3	11.8
650	Gorgosaurus	Gorgosaurus lateral	Tyrannosauridae	Tyrannosauridae Lateral	ROM 1247	d06	libratus	Smith et al., 2005	Dinosaur Park Formation	Dinosaur Provincial Park	Alberta	U.S.	Late Campanian	Late Cretaceous	Immature (young); Stage 1	Right	d06	Lateral	21.24	12.89	43.84	53.44	0.606874	2.06403	?	?	?	?	?	?	?	?	?	?	?	?	?	?	?	84.24	0.06	11	11	12.7	12.5	12	14.7	11.6	13.1
651	Gorgosaurus	Gorgosaurus lateral	Tyrannosauridae	Tyrannosauridae Lateral	ROM 1247	d08	libratus	Smith et al., 2005	Dinosaur Park Formation	Dinosaur Provincial Park	Alberta	U.S.	Late Campanian	Late Cretaceous	Immature (young); Stage 1	Right	d08	Lateral	19.96	13.56	43.31	44.01	0.679359	2.16984	?	?	?	?	?	?	?	?	?	?	?	?	?	?	?	85.02	0.11	/	10.5	11.5	12	14	14.2	11	13.4
652	Gorgosaurus	Gorgosaurus lateral	Tyrannosauridae	Tyrannosauridae Lateral	ROM 1247	d09	libratus	Smith et al., 2005	Dinosaur Park Formation	Dinosaur Provincial Park	Alberta	U.S.	Late Campanian	Late Cretaceous	Immature (young); Stage 1	Right	d09	Lateral	17.81	7.67	31.91	32.75	0.430657	1.79169	?	?	?	?	?	?	?	?	?	?	?	?	?	?	?	83.22	0.05	12	12	/	12	12.5	12	12	12.1
653	Gorgosaurus	Gorgosaurus lateral	Tyrannosauridae	Tyrannosauridae Lateral	ROM 1247	d11	libratus	Smith et al., 2005	Dinosaur Park Formation	Dinosaur Provincial Park	Alberta	U.S.	Late Campanian	Late Cretaceous	Immature (young); Stage 1	Right	d11	Lateral	18.48	11.41	37	41.35	0.617424	2.00216	?	?	?	?	?	?	?	?	?	?	?	?	?	?	?	83.66	0.08	/	10	14.3	13	13	/	12.2	13
654	Gorgosaurus	Gorgosaurus lateral	Tyrannosauridae	Tyrannosauridae Lateral	ROM 1247	d13	libratus	Smith et al., 2005	Dinosaur Park Formation	Dinosaur Provincial Park	Alberta	U.S.	Late Campanian	Late Cretaceous	Immature (young); Stage 1	Right	d13	Lateral	17.72	9.21	31.3	41.5	0.519752	1.76637	?	?	?	?	?	?	?	?	?	?	?	?	?	?	?	81.94	0.06	10	?	/	/	15	/	10	15
655	Gorgosaurus	Gorgosaurus lateral	Tyrannosauridae	Tyrannosauridae Lateral	ROM 1247	d15	libratus	Smith et al., 2005	Dinosaur Park Formation	Dinosaur Provincial Park	Alberta	U.S.	Late Campanian	Late Cretaceous	Immature (young); Stage 1	Right	d15	Lateral	13.69	8.83	22.19	24.9	0.644996	1.62089	?	?	?	?	?	?	?	?	?	?	?	?	?	?	?	79.76	0.09	/	?	/	/	14	/	/	14
656	Gorgosaurus	Gorgosaurus lateral	Tyrannosauridae	Tyrannosauridae Lateral	ROM 1247	mx04	libratus	Smith et al., 2005	Dinosaur Park Formation	Dinosaur Provincial Park	Alberta	U.S.	Late Campanian	Late Cretaceous	Immature (young); Stage 1	Right	mx04	Lateral	26.48	13.4	54.85	58.75	0.506042	2.07137	?	?	?	?	?	?	?	?	?	?	?	?	?	?	?	85.86	0.01	9	9	10	12	11.5	11	8.7	11.5
657	Gorgosaurus	Gorgosaurus lateral	Tyrannosauridae	Tyrannosauridae Lateral	ROM 1247	mx09	libratus	Smith et al., 2005	Dinosaur Park Formation	Dinosaur Provincial Park	Alberta	U.S.	Late Campanian	Late Cretaceous	Immature (young); Stage 1	Right	mx09	Lateral	20.55	10.57	40.31	36.92	0.514355	1.96156	?	?	?	?	?	?	?	?	?	?	?	?	?	?	?	85.21	0.06	12	12.5	14	12	11	/	12.8	11.5
658	Gorgosaurus	Gorgosaurus mesial	Tyrannosauridae	Tyrannosauridae Mesial	USNM 12814 (AMNH 5428)	d03	libratus	Hendrickx et al., 2015	Belly River Formation	Red Deer River	Alberta	Canada	Upper Campanian	Late Cretaceous	Subadult; Large Stage 1 (18 yo)	Left	d03	Mesial	22.2	15.8	40	45.1	0.711712	1.8018	16.4	13.4	0.817073	14.9	30.2	66.9623	0	?	?	absent	absent	?	?	?	?	?	?	?	9.5	?	10	10	?	9.5	10
659	Gorgosaurus	Gorgosaurus lateral	Tyrannosauridae	Tyrannosauridae Lateral	USNM 12814 (AMNH 5428)	d07	libratus	Hendrickx et al., 2015	Belly River Formation	Red Deer River	Alberta	Canada	Upper Campanian	Late Cretaceous	Subadult; Large Stage 1 (18 yo)	Left	d07	Lateral	20.6	14.6	38.9	45	0.708738	1.88835	18.2	12.1	0.664835	15	30	66.6667	3	?	?	absent	absent	?	?	?	?	?	?	?	11	?	10.5	10.5	12	11	11
660	Gorgosaurus	Gorgosaurus lateral	Tyrannosauridae	Tyrannosauridae Lateral	USNM 12814 (AMNH 5428)	d09	libratus	Hendrickx et al., 2015	Belly River Formation	Red Deer River	Alberta	Canada	Upper Campanian	Late Cretaceous	Subadult; Large Stage 1 (18 yo)	Left	d09	Lateral	20.3	14.9	42.5	45.1	0.73399	2.0936	17.1	11.4	0.666667	13.6	31.5	69.8448	3	?	?	absent	absent	?	?	?	?	?	?	13	11	?	11.5	10	14.5	12	12
661	Gorgosaurus	Gorgosaurus lateral	Tyrannosauridae	Tyrannosauridae Lateral	USNM 12814 (AMNH 5428)	d11	libratus	Hendrickx et al., 2015	Belly River Formation	Red Deer River	Alberta	Canada	Upper Campanian	Late Cretaceous	Subadult; Large Stage 1 (18 yo)	Left	d11	Lateral	16.6	12.4	29.6	35.6	0.746988	1.78313	16.2	10.7	0.660494	11.3	24.3	68.2584	4	?	?	absent	absent	?	?	?	?	?	?	13	11	?	?	11	?	12	11
662	Gorgosaurus	Gorgosaurus lateral	Tyrannosauridae	Tyrannosauridae Lateral	USNM 12814 (AMNH 5428)	d12	libratus	Hendrickx et al., 2015	Belly River Formation	Red Deer River	Alberta	Canada	Upper Campanian	Late Cretaceous	Subadult; Large Stage 1 (18 yo)	Left	d12	Lateral	17.9	12.6	27	33.1	0.703911	1.50838	13.4	7.9	0.589552	0	33.1	100	4	?	?	absent	absent	?	?	?	?	?	?	10.5	11	?	10.626	11.5	?	10.75	11.063
663	Gorgosaurus	Gorgosaurus lateral	Tyrannosauridae	Tyrannosauridae Lateral	USNM 12814 (AMNH 5428)	d13	libratus	Hendrickx et al., 2015	Belly River Formation	Red Deer River	Alberta	Canada	Upper Campanian	Late Cretaceous	Subadult; Large Stage 1 (18 yo)	Left	d13	Lateral	12.7	7.9	14.5	19.1	0.622047	1.14173	8.9	5.8	0.651685	0	19.1	100	0	?	?	absent	absent	?	?	?	?	?	?	11.5	?	?	13.5	?	?	11.5	13.5
664	Gorgosaurus	Gorgosaurus lateral	Tyrannosauridae	Tyrannosauridae Lateral	TMP 86.144.01	dt4	libratus	Young et al., 2019 (C.H. pers. measurements)	Oldman Member, Judith River Formation	Dinosaur Provincial Park	Alberta	Canada	Campanian	Late Cretaceous	Juvenile; Small Stage 1 (7 yo)	Left	dt4	Lateral	14.83	7.88	29.05	26.77	0.531355	1.95887	10.74	6.98	0.649907	4.24	22.53	84.1614	2/4mm	tenuous, visible with light on labial	short on D labial and lingual	absent	absent	?	?	?	?	?	?	14.16	15	/	15	15	20	14.58	16.66
665	Gorgosaurus	Gorgosaurus lateral	Tyrannosauridae	Tyrannosauridae Lateral	TMP 86.144.01	dt5	libratus	Young et al., 2019 (C.H. pers. measurements)	Oldman Member, Judith River Formation	Dinosaur Provincial Park	Alberta	Canada	Campanian	Late Cretaceous	Juvenile; Small Stage 1 (7 yo)	Left	dt5	Lateral	14.59	8.72	29.83	28.98	0.59767	2.04455	12.21	7.08	0.579853	8.75	20.23	69.8068	2/4mm	very tenuous on basolabial side	short on D labial and lingual	absent	absent	?	?	?	?	?	?	15	14.16	/	13.125	15	20	14.58	16.25
666	Gorgosaurus	Gorgosaurus lateral	Tyrannosauridae	Tyrannosauridae Lateral	TMP 86.144.01	dt10	libratus	Young et al., 2019 (C.H. pers. measurements)	Oldman Member, Judith River Formation	Dinosaur Provincial Park	Alberta	Canada	Campanian	Late Cretaceous	Juvenile; Small Stage 1 (7 yo)	Left	dt10	Lateral	13.69	7.51	23.65	24.77	0.548576	1.72754	11.4	6.36	0.557895	8.16	16.61	67.0569	0	absent	short to medium on D labial and lingual	absent	absent	?	?	?	?	?	?	16.25	18	/	15	15	22	17.125	17.33
667	Gorgosaurus	Gorgosaurus mesial	Tyrannosauridae	Tyrannosauridae Mesial	TMP 86.144.01	Isolated	libratus	Young et al., 2019 (C.H. pers. measurements)	Oldman Member, Judith River Formation	Dinosaur Provincial Park	Alberta	Canada	Campanian	Late Cretaceous	Juvenile; Small Stage 1 (7 yo)	Loose teeth, transitional	Small, transitional, very long root	Mesial	9.65	7.51	20.09	21.89	0.778238	2.08187	7.69	6.44	0.837451	2.15	19.74	90.1	2/3mm	visible with light on labial close to D	absent	absent	absent	?	?	?	?	?	?	?	?	/	12.5	13.5	16.5	?	14.16
668	Gorgosaurus	Gorgosaurus lateral	Tyrannosauridae	Tyrannosauridae Lateral	TMP 86.144.01	Isolated	libratus	Young et al., 2019 (C.H. pers. measurements)	Oldman Member, Judith River Formation	Dinosaur Provincial Park	Alberta	Canada	Campanian	Late Cretaceous	Juvenile; Small Stage 1 (7 yo)	Loose teeth, lateral	Lateral, largest with hollow root	Lateral	19.01	9.84	42.29	41.04	0.517622	2.22462	14.78	8.44	0.571042	13.79	27.25	66.3986	2/2mm	visible with light, numerous on basolabial	D medium, M short	absent	absent	?	?	?	?	?	?	14	13	/	14	13.5	17.5	13.5	15
669	Gorgosaurus	Gorgosaurus lateral	Tyrannosauridae	Tyrannosauridae Lateral	TMP 86.144.01	Isolated	libratus	Young et al., 2019 (C.H. pers. measurements)	Oldman Member, Judith River Formation	Dinosaur Provincial Park	Alberta	Canada	Campanian	Late Cretaceous	Juvenile; Small Stage 1 (7 yo)	Loose teeth, lateral	Lateral, large with crushed central crown imcomplete root	Lateral	16.15	8.81	35.22	33.73	0.545511	2.1808	13.14	6.82	0.519026	9.28	24.45	72.4874	2/2mm	well-visible with light basolabial	D medium, M short	absent	absent	?	?	?	?	?	?	17	14.5	/	15	15.5	20	15.75	16.83
670	Gorgosaurus	Gorgosaurus lateral	Tyrannosauridae	Tyrannosauridae Lateral	TMP 86.144.01	Isolated	libratus	Young et al., 2019 (C.H. pers. measurements)	Oldman Member, Judith River Formation	Dinosaur Provincial Park	Alberta	Canada	Campanian	Late Cretaceous	Juvenile; Small Stage 1 (7 yo)	Loose teeth, lateral	Lateral, medium mising DB on lingual	Lateral	15.48	8.13	29.09	29.46	0.525194	1.8792	12.33	6.68	0.541768	8.92	20.54	69.7217	2/2mm	tenuous, numerous close to D on labial, and at base on lingual	D medium, M short to absent	absent	absent	?	?	?	?	?	?	13.5	17.5	/	15	16.5	21	15.5	17.5
671	Gorgosaurus	Gorgosaurus lateral	Tyrannosauridae	Tyrannosauridae Lateral	TMP 86.144.01	Isolated	libratus	Young et al., 2019 (C.H. pers. measurements)	Oldman Member, Judith River Formation	Dinosaur Provincial Park	Alberta	Canada	Campanian	Late Cretaceous	Juvenile; Small Stage 1 (7 yo)	Loose teeth, lateral	Lateral, medium crushed root on both sides	Lateral	14.64	9.31	28.6	28.23	0.635929	1.95355	11.54	7.39	0.640381	?	?	?	2/1,5mm	visible with light on basolabial	D medium, M absent	absent	absent	?	?	?	?	?	?	14	15.375	/	15	14	20	14.6875	16.33
672	Gorgosaurus	Gorgosaurus lateral	Tyrannosauridae	Tyrannosauridae Lateral	TMP 86.144.01	Isolated	libratus	Young et al., 2019 (C.H. pers. measurements)	Oldman Member, Judith River Formation	Dinosaur Provincial Park	Alberta	Canada	Campanian	Late Cretaceous	Juvenile; Small Stage 1 (7 yo)	Loose teeth, lateral	Smallest, with incomplete root	Lateral	14.07	6.79	21.42	22	0.482587	1.52239	10.43	6.09	0.583893	4.9	17.1	77.7273	0	absent	D short, M?	absent	absent	?	?	?	?	?	?	17.5	?	/	15	17	23	17.5	16
673	Daspletosaurus	Daspletosaurus lateral	Tyrannosauridae	Tyrannosauridae Lateral	BMNH R4863 Cutler collection	d04	torosus	Smith et al., 2005	Dinosaur Park Formation	Dinosaur Provincial Park	Alberta	U.S.	Late Campanian	Late Cretaceous	Adult?	Right	d04	Lateral	28.83	19.82	55.99	59.02	0.687478	1.94207	?	?	?	?	?	?	?	?	?	?	?	?	?	?	?	86.03	0.01	12	11	15	12	10	12.5	12.7	11.5
674	Daspletosaurus	Daspletosaurus lateral	Tyrannosauridae	Tyrannosauridae Lateral	BMNH R4863 Cutler collection	d08	torosus	Smith et al., 2005	Dinosaur Park Formation	Dinosaur Provincial Park	Alberta	U.S.	Late Campanian	Late Cretaceous	Adult?	Right	d08	Lateral	26.37	17.7	44.57	51.28	0.671217	1.69018	?	?	?	?	?	?	?	?	?	?	?	?	?	?	?	84.81	-0.01	14	13	14	13	10	12	13.7	11.7
675	Daspletosaurus	Daspletosaurus lateral	Tyrannosauridae	Tyrannosauridae Lateral	BMNH R4863 Cutler collection	d10	torosus	Smith et al., 2005	Dinosaur Park Formation	Dinosaur Provincial Park	Alberta	U.S.	Late Campanian	Late Cretaceous	Adult?	Right	d10	Lateral	24.47	18.46	53.37	57.27	0.754393	2.18104	?	?	?	?	?	?	?	?	?	?	?	?	?	?	?	85.71	0.06	13	10	13	12	10	14	12	12
676	Daspletosaurus	Daspletosaurus mesial	Tyrannosauridae	Tyrannosauridae Mesial	BMNH R4863 Cutler collection	Isolated, pmx	torosus	Hendrickx et al., 2015	Dinosaur Park Formation	Dinosaur Provincial Park	Alberta	U.S.	Late Campanian	Late Cretaceous	Adult?	/	Isolated, pmx	Mesial	10.14	16.63	30.91	30.89	1.64004	3.04832	9.42	12.05	1.27919	6.66	24.23	78.4396	2/3	visible with light on distal side, extremely pronounced on root, on both mesial and distal sides	absent	absent	absent	?	?	?	?	?	?	20	20	?	?	20	?	?	?
677	Daspletosaurus	Daspletosaurus lateral	Tyrannosauridae	Tyrannosauridae Lateral	BMNH R4863 Cutler collection	d04	torosus	Hendrickx et al., 2015	Dinosaur Park Formation	Dinosaur Provincial Park	Alberta	U.S.	Late Campanian	Late Cretaceous	Adult?	Right	d04	Lateral	28.99	20.3	56.18	60.6	0.700241	1.93791	17.99	12.5	0.69483	?	?	?	2-3	Large, well visible	D, M, short	absent	absent	?	?	?	?	?	?	11.5	12.5	?	11.25	10	12.5	12	11.25
678	Daspletosaurus	Daspletosaurus lateral	Tyrannosauridae	Tyrannosauridae Lateral	BMNH R4863 Cutler collection	d08	torosus	Hendrickx et al., 2015	Dinosaur Park Formation	Dinosaur Provincial Park	Alberta	U.S.	Late Campanian	Late Cretaceous	Adult?	Right	d08	Lateral	26.79	18.15	43.82	51.84	0.677492	1.63568	20.65	13.1	0.634383	?	?	?	2,5-3	Large, well visible	M short, D medium	absent	absent	?	?	?	?	?	?	10	11	12.5	11.25	12	?	11.16	11.625
679	Daspletosaurus	Daspletosaurus lateral	Tyrannosauridae	Tyrannosauridae Lateral	BMNH R4863 Cutler collection	d10	torosus	Hendrickx et al., 2015	Dinosaur Park Formation	Dinosaur Provincial Park	Alberta	U.S.	Late Campanian	Late Cretaceous	Adult?	Right	d10	Lateral	25.87	18.3	54.4	57.32	0.707383	2.10282	19.6	12.49	0.637245	?	?	?	3	Large, well visible	D, M short	absent	absent	?	?	?	?	?	?	?	11.5	?	10	10.5	17	?	12.5
680	Daspletosaurus	Daspletosaurus lateral	Tyrannosauridae	Tyrannosauridae Lateral	BMNH R4863 Cutler collection	d12	torosus	Hendrickx et al., 2015	Dinosaur Park Formation	Dinosaur Provincial Park	Alberta	U.S.	Late Campanian	Late Cretaceous	Adult?	Right	d12	Lateral	16.62	11.37	23.14	24.23	0.684116	1.3923	13.49	8.84	0.6553	?	?	?	3	Large, well visible	D short, M medium	absent	absent	?	?	?	?	?	?	?	15	?	?	15	18.33	16.665	16.665
681	Daspletosaurus	Daspletosaurus lateral	Tyrannosauridae	Tyrannosauridae Lateral	BMNH R4863 Purchased by Sternberg 1910	Isolated	torosus	Hendrickx et al., 2015	Dinosaur Park Formation	Dinosaur Provincial Park	Alberta	Canada	Mid-Campanian	Late Cretaceous	Adult?	/	Isolated	Lateral	26.85	20.4	60.8	62.22	0.759777	2.26443	20.5	14.72	0.718049	8.59	53.63	86.1941	2,5-3	Large, well visible	M short, D long	absent	absent	?	?	?	?	?	?	11.25	10.5	11.66	11.5	9	13.75	11.136	11.41
682	Daspletosaurus	Daspletosaurus lateral	Tyrannosauridae	Tyrannosauridae Lateral	AMNH 5346	mx02	sp.	Smith et al., 2005	Dinosaur Park Formation	Dinosaur Provincial Park	Alberta	Canada	Late Campanian	Late Cretaceous	Adult; Stage 4	Left	mx02	Lateral	27	22.63	74.78	80.86	0.838148	2.76963	?	?	?	?	?	?	?	?	?	?	?	?	?	?	?	86.79	0.09	11.7	12	13.8	12	11	12.8	12.5	11.9
683	Daspletosaurus	Daspletosaurus mesial	Tyrannosauridae	Tyrannosauridae Mesial	MOR 590	d02	sp.	Smith et al., 2005	Two Medicine Formation	Rocky Mountains	Montana	U.S.	Campanian	Late Cretaceous	Immature; Stage 2	Right	d02 (not fully erupted)	Mesial	18.02	12.68	36.43	39.52	0.703663	2.02164	?	?	?	?	?	?	?	?	?	?	?	?	?	?	?	83.71	0.11	15.7	12	/	/	11.2	16.8	13.9	14
684	Daspletosaurus	Daspletosaurus lateral	Tyrannosauridae	Tyrannosauridae Lateral	MOR 590	d03	sp.	Smith et al., 2005	Two Medicine Formation	Rocky Mountains	Montana	U.S.	Campanian	Late Cretaceous	Immature; Stage 2	Right	d03	Lateral	22.88	17.81	52.62	56.49	0.778409	2.29983	?	?	?	?	?	?	?	?	?	?	?	?	?	?	?	85.62	0.07	11.5	11.3	12	10.8	10	11.8	11.6	10.9
685	Daspletosaurus	Daspletosaurus lateral	Tyrannosauridae	Tyrannosauridae Lateral	MOR 590	d05	sp.	Smith et al., 2005	Two Medicine Formation	Rocky Mountains	Montana	U.S.	Campanian	Late Cretaceous	Immature; Stage 2	Right	d05	Lateral	22.86	17.28	54.55	57.94	0.755906	2.38626	?	?	?	?	?	?	?	?	?	?	?	?	?	?	?	85.8	0.07	13.8	10.5	12.7	9.3	?	10	12.2	10.7
686	Daspletosaurus	Daspletosaurus lateral	Tyrannosauridae	Tyrannosauridae Lateral	MOR 590	d07	sp.	Smith et al., 2005	Two Medicine Formation	Rocky Mountains	Montana	U.S.	Campanian	Late Cretaceous	Immature; Stage 2	Right	d07	Lateral	22.53	16.63	49.57	49.81	0.738127	2.20018	?	?	?	?	?	?	?	?	?	?	?	?	?	?	?	85.7	0.06	12	10	12.8	12	9	/	11.6	10.5
687	Daspletosaurus	Daspletosaurus lateral	Tyrannosauridae	Tyrannosauridae Lateral	MOR 590	d08	sp.	Smith et al., 2005	Two Medicine Formation	Rocky Mountains	Montana	U.S.	Campanian	Late Cretaceous	Immature; Stage 2	Right	d08	Lateral	22.32	12.29	46.78	50.65	0.550627	2.09588	?	?	?	?	?	?	?	?	?	?	?	?	?	?	?	85.09	0.04	12	12.8	/	11	10	11	12.4	10.7
688	Daspletosaurus	Daspletosaurus lateral	Tyrannosauridae	Tyrannosauridae Lateral	MOR 590	d10	sp.	Smith et al., 2005	Two Medicine Formation	Rocky Mountains	Montana	U.S.	Campanian	Late Cretaceous	Immature; Stage 2	Right	d10	Lateral	19.19	12.17	34.93	35.69	0.634184	1.82022	?	?	?	?	?	?	?	?	?	?	?	?	?	?	?	83.82	0.05	13.8	/	/	12.8	11	11.1	13.8	11.6
689	Daspletosaurus	Daspletosaurus lateral	Tyrannosauridae	Tyrannosauridae Lateral	TMP 1997.12.223	mx5	torosus	Young et al., 2019 (C.H. pers. measurements)	Dinosaur Park Formation	Dinosaur Provincial Park	Alberta	Canada	Campanian	Late Cretaceous	Adult	Right	mx5	Lateral	33.24	23.64	74.88	79.05	0.711191	2.25271	25.87	18.01	0.696173	0	79.05	100	0	absent	absent	absent	absent	?	?	?	?	?	?	9.5	9	16	10	8.5	14	11.5	10.83
690	Daspletosaurus	Daspletosaurus lateral	Tyrannosauridae	Tyrannosauridae Lateral	TMP 1997.12.223	mx8	torosus	Young et al., 2019 (C.H. pers. measurements)	Dinosaur Park Formation	Dinosaur Provincial Park	Alberta	Canada	Campanian	Late Cretaceous	Adult	Right	mx8	Lateral	30.51	18.3	60.01	57.15	0.599803	1.9669	23.93	15.09	0.630589	0	57.15	100	0	absent	D short on labial	absent	absent	?	?	?	?	?	?	10.5	10.5	16.5	11.5	11.5	13.33	12.5	12.11
691	Daspletosaurus	Daspletosaurus lateral	Tyrannosauridae	Tyrannosauridae Lateral	TMP 1997.12.223	mx11	torosus	Young et al., 2019 (C.H. pers. measurements)	Dinosaur Park Formation	Dinosaur Provincial Park	Alberta	Canada	Campanian	Late Cretaceous	Adult	Right	mx11	Lateral	24.58	15.79	45.24	46.67	0.642392	1.84052	19.79	11.22	0.566953	0	46.67	100	2/3mm	very tenuous on labial side	D short on labial	absent	absent	?	?	?	?	?	?	11.5	11	19	12.5	12.5	17	13.83	14
692	Albertosaurus	Albertosaurus lateral	Tyrannosauridae	Tyrannosauridae Lateral	DMNH 22019	Isolated	sp.	Hendrickx et al., 2015	Prince Creek Formation	Calville R.	Alaska	U.S.	?	Late Cretaceous	?	/	Isolated	Lateral	22.8	13	45.9	49.8	0.570175	2.01316	?	?	?	7.6	42.2	84.739	2	?	absent	absent	absent	1.4	1	1.2	1.1	?	?	12	13	13	11.5	11	13	12.66	11.83
693	Albertosaurus	Albertosaurus lateral	Tyrannosauridae	Tyrannosauridae Lateral	TMP 81.10.01	mx4	sarcophagus	Young et al., 2019 (C.H. pers. measurements)	Horshoe Canyon Formation	Dinosaur Provincial Park	Alberta	Canada	Campanian to early Maastrichtian	Late Cretaceous	Adult (24 yo)	Right	mx4	Lateral	30.85	16.19	67.51	69.54	0.524797	2.18833	24.8	15.69	0.632661	0	69.54	100	2/4mm	tenuous on basolabial	D short to absent, M absent	absent	absent	?	?	?	?	?	?	9.5	8.5	15	10	9	12.5	11	10.5
694	Albertosaurus	Albertosaurus lateral	Tyrannosauridae	Tyrannosauridae Lateral	TMP 81.10.01	mx5	sarcophagus	Young et al., 2019 (C.H. pers. measurements)	Horshoe Canyon Formation	Dinosaur Provincial Park	Alberta	Canada	Campanian to early Maastrichtian	Late Cretaceous	Adult (24 yo)	Right	mx5	Lateral	25.79	14.15	52.7	50.81	0.548662	2.04343	20.17	12.31	0.610312	0	50.81	100	2/3or4mm	tenuous on basolabial and labial close to D	D short to absent, M absent	absent	absent	?	?	?	?	?	?	10	10.5	15.5	10	11	11.5	12	10.83
695	Albertosaurus	Albertosaurus lateral	Tyrannosauridae	Tyrannosauridae Lateral	TMP 81.10.01	mx3	sarcophagus	Young et al., 2019 (C.H. pers. measurements)	Horshoe Canyon Formation	Dinosaur Provincial Park	Alberta	Canada	Campanian to early Maastrichtian	Late Cretaceous	Adult (24 yo)	Left	mx3	Lateral	30.87	19.72	70.27	71.6	0.638808	2.27632	23.26	17.66	0.759243	18.21	53.39	74.567	?	?	?	absent	absent	?	?	?	?	?	?	8.5	9	13	9	9	10.5	10.16	9.5
696	Albertosaurus	Albertosaurus lateral	Tyrannosauridae	Tyrannosauridae Lateral	TMP 81.10.01	mx4	sarcophagus	Young et al., 2019 (C.H. pers. measurements)	Horshoe Canyon Formation	Dinosaur Provincial Park	Alberta	Canada	Campanian to early Maastrichtian	Late Cretaceous	Adult (24 yo)	Left	mx4	Lateral	33.26	19.54	76.39	73.46	0.587492	2.29675	25.15	16.18	0.64334	10.78	62.68	85.3253	?	?	?	absent	absent	?	?	?	?	?	?	11	9	11	9	9	11	10.33	9.66
697	Albertosaurus	Albertosaurus lateral	Tyrannosauridae	Tyrannosauridae Lateral	TMP 81.10.01	mx5	sarcophagus	Young et al., 2019 (C.H. pers. measurements)	Horshoe Canyon Formation	Dinosaur Provincial Park	Alberta	Canada	Campanian to early Maastrichtian	Late Cretaceous	Adult (24 yo)	Left	mx5	Lateral	33.84	18.68	74.92	77.45	0.552009	2.21395	26.53	16.2	0.610629	5.49	71.96	92.9116	?	?	?	absent	absent	?	?	?	?	?	?	7.5	10	16.66	9.25	9	11.5	11.38	9.91
698	Albertosaurus	Albertosaurus lateral	Tyrannosauridae	Tyrannosauridae Lateral	TMP 81.10.01	mx6	sarcophagus	Young et al., 2019 (C.H. pers. measurements)	Horshoe Canyon Formation	Dinosaur Provincial Park	Alberta	Canada	Campanian to early Maastrichtian	Late Cretaceous	Adult (24 yo)	Left	mx6	Lateral	29.02	16.6	62.1	67.57	0.572019	2.1399	22.42	13.18	0.587868	5.08	62.49	92.4819	?	?	?	absent	absent	?	?	?	?	?	?	11	9	?	9	9	10.5	10	9.5
699	Albertosaurus	Albertosaurus lateral	Tyrannosauridae	Tyrannosauridae Lateral	TMP 81.10.01	mx7	sarcophagus	Young et al., 2019 (C.H. pers. measurements)	Horshoe Canyon Formation	Dinosaur Provincial Park	Alberta	Canada	Campanian to early Maastrichtian	Late Cretaceous	Adult (24 yo)	Left	mx7	Lateral	31.78	18.01	63.77	79.18	0.566709	2.00661	24.11	14.22	0.589797	?	?	?	?	?	?	absent	absent	?	?	?	?	?	?	8.125	10	13	9.5	10	10	10.375	9.83
700	Albertosaurus	Albertosaurus lateral	Tyrannosauridae	Tyrannosauridae Lateral	TMP 81.10.01	mx8	sarcophagus	Young et al., 2019 (C.H. pers. measurements)	Horshoe Canyon Formation	Dinosaur Provincial Park	Alberta	Canada	Campanian to early Maastrichtian	Late Cretaceous	Adult (24 yo)	Left	mx8	Lateral	29.48	16.66	57.41	54.41	0.565129	1.94742	23.16	13.56	0.585492	4.91	49.5	90.9759	?	?	?	absent	absent	?	?	?	?	?	?	9	9.75	11.875	9.5	10	12	10.21	10.5
701	Albertosaurus	Albertosaurus lateral	Tyrannosauridae	Tyrannosauridae Lateral	TMP 81.10.01	mx12	sarcophagus	Young et al., 2019 (C.H. pers. measurements)	Horshoe Canyon Formation	Dinosaur Provincial Park	Alberta	Canada	Campanian to early Maastrichtian	Late Cretaceous	Adult (24 yo)	Left	mx12	Lateral	21.88	14.62	41.58	42.59	0.66819	1.90037	17.41	10.83	0.622056	3.24	39.35	92.3926	?	?	?	absent	absent	?	?	?	?	?	?	11	12	18.75	11	12	16.65	13.92	13.22
702	Albertosaurus	Albertosaurus lateral	Tyrannosauridae	Tyrannosauridae Lateral	TMP 99.50.40	dt11	sarcophagus	Young et al., 2019 (C.H. pers. measurements)	Horshoe Canyon Formation	Dinosaur Provincial Park	Alberta	Canada	Campanian to early Maastrichtian	Late Cretaceous	Adult (24 yo)	Left	dt11	Lateral	14.62	9.1	25.28	28.82	0.622435	1.72914	13.1	6.26	0.477863	0	28.82	100	2/2mm	numerous and closely packed on labial, well-visible	medium to well-developped on D, short on M	absent	absent	?	?	?	?	?	?	13.75	13.5	21	14	13.25	18.5	16.08	15.25
703	Tyrannosaurus	Tyrannosaurus mesial	Tyrannosauridae	Tyrannosauridae Mesial	FMNH PR2081 "Sue"	pm03	rex	Smith, 2005	Hell Creek Formation	Faith, Cheyenne River Indian Reservation	South Dakota	U.S.	Maastrichtian	Late Cretaceous	Old adult (28 yo)	Left	pm03	Mesial	24	36.06	63.65	71.97	1.5025	1.76511	?	?	?	?	?	?	?	?	?	?	?	?	?	?	?	86.38	-0.1	8.4	7	12	8	7.1	10	9.1	8.4
704	Tyrannosaurus	Tyrannosaurus lateral	Tyrannosauridae	Tyrannosauridae Lateral	FMNH PR2081 "Sue"	mx05	rex	Smith, 2005	Hell Creek Formation	Faith, Cheyenne River Indian Reservation	South Dakota	U.S.	Maastrichtian	Late Cretaceous	Old adult (28 yo)	Left	mx05	Lateral	45.46	32.63	94.06	108.36	0.717774	2.06907	?	?	?	?	?	?	?	?	?	?	?	?	?	?	?	87.43	-0.1	7.3	6.5	12.9	8.6	7.5	11.2	8.9	9.1
705	Tyrannosaurus	Tyrannosaurus lateral	Tyrannosauridae	Tyrannosauridae Lateral	FMNH PR2081 "Sue"	mx07	rex	Smith, 2005	Hell Creek Formation	Faith, Cheyenne River Indian Reservation	South Dakota	U.S.	Maastrichtian	Late Cretaceous	Old adult (28 yo)	Left	mx07	Lateral	39.41	27.18	75.75	86.34	0.689673	1.9221	?	?	?	?	?	?	?	?	?	?	?	?	?	?	?	86.88	-0.08	7	7.5	11.5	8.3	8.3	11.4	8.7	9.3
706	Tyrannosaurus	Tyrannosaurus lateral	Tyrannosauridae	Tyrannosauridae Lateral	FMNH PR2081 "Sue"	mx08	rex	Smith, 2005	Hell Creek Formation	Faith, Cheyenne River Indian Reservation	South Dakota	U.S.	Maastrichtian	Late Cretaceous	Old adult (28 yo)	Left	mx08	Lateral	38.56	26.2	72.55	83.44	0.679461	1.88148	?	?	?	?	?	?	?	?	?	?	?	?	?	?	?	86.75	-0.08	7	7	12	9.1	8.8	11.6	8.7	9.8
707	Tyrannosaurus	Tyrannosaurus lateral	Tyrannosauridae	Tyrannosauridae Lateral	FMNH PR2081 "Sue"	mx01	rex	Smith, 2005	Hell Creek Formation	Faith, Cheyenne River Indian Reservation	South Dakota	U.S.	Maastrichtian	Late Cretaceous	Old adult (28 yo)	Right	mx01	Lateral	44.86	32.6	91.12	101.55	0.726705	2.03121	?	?	?	?	?	?	?	?	?	?	?	?	?	?	?	87.43	-0.11	7	6	8.2	7.2	7	9.8	7.1	8
708	Tyrannosaurus	Tyrannosaurus lateral	Tyrannosauridae	Tyrannosauridae Lateral	FMNH PR2081 "Sue"	mx02	rex	Smith, 2005	Hell Creek Formation	Faith, Cheyenne River Indian Reservation	South Dakota	U.S.	Maastrichtian	Late Cretaceous	Old adult (28 yo)	Right	mx02	Lateral	47.69	37.58	105.26	117.64	0.788006	2.20717	?	?	?	?	?	?	?	?	?	?	?	?	?	?	?	87.73	-0.11	7	7	11.5	7	7	10	8.5	8
709	Tyrannosaurus	Tyrannosaurus lateral	Tyrannosauridae	Tyrannosauridae Lateral	FMNH PR2081 "Sue"	mx03	rex	Smith, 2005	Hell Creek Formation	Faith, Cheyenne River Indian Reservation	South Dakota	U.S.	Maastrichtian	Late Cretaceous	Old adult (28 yo)	Right	mx03	Lateral	46.74	37.21	108.82	122.99	0.796106	2.3282	?	?	?	?	?	?	?	?	?	?	?	?	?	?	?	87.76	-0.08	7	6	13.3	8.3	7	10.6	8.8	8.6
710	Tyrannosaurus	Tyrannosaurus lateral	Tyrannosauridae	Tyrannosauridae Lateral	FMNH PR2081 "Sue"	mx10	rex	Smith, 2005	Hell Creek Formation	Faith, Cheyenne River Indian Reservation	South Dakota	U.S.	Maastrichtian	Late Cretaceous	Old adult (28 yo)	Right	mx10	Lateral	35.65	23.48	61.04	71.65	0.658626	1.7122	?	?	?	?	?	?	?	?	?	?	?	?	?	?	?	86.16	-0.08	6.5	7	11.8	8	9	12.3	8.4	9.8
711	Tyrannosaurus	Tyrannosaurus lateral	Tyrannosauridae	Tyrannosauridae Lateral	FMNH PR2081 "Sue"	mx11	rex	Smith, 2005	Hell Creek Formation	Faith, Cheyenne River Indian Reservation	South Dakota	U.S.	Maastrichtian	Late Cretaceous	Old adult (28 yo)	Right	mx11	Lateral	27.86	18.18	45.96	49.9	0.652548	1.64968	?	?	?	?	?	?	?	?	?	?	?	?	?	?	?	85.15	-0.02	7.5	11	13.7	9.7	10	15.8	10.7	11.8
712	Tyrannosaurus	Tyrannosaurus lateral	Tyrannosauridae	Tyrannosauridae Lateral	FMNH PR2081 "Sue"	mx12	rex	Smith, 2005	Hell Creek Formation	Faith, Cheyenne River Indian Reservation	South Dakota	U.S.	Maastrichtian	Late Cretaceous	Old adult (28 yo)	Right	mx12	Lateral	18.96	13.2	29.72	32.17	0.696203	1.56751	?	?	?	?	?	?	?	?	?	?	?	?	?	?	?	82.55	0.03	9	9	14.8	10	12	13	10.9	11.7
713	Tyrannosaurus	Tyrannosaurus mesial	Tyrannosauridae	Tyrannosauridae Mesial	FMNH PR2081 "Sue"	d02	rex	Smith, 2005	Hell Creek Formation	Faith, Cheyenne River Indian Reservation	South Dakota	U.S.	Maastrichtian	Late Cretaceous	Old adult (28 yo)	Comp/	d02	Mesial	24.51	40.76	75.03	81.29	1.66299	1.84078	?	?	?	?	?	?	?	?	?	?	?	?	?	?	?	87	-0.11	8	7	12.9	9.5	7	9.4	9.3	8.6
714	Tyrannosaurus	Tyrannosaurus lateral	Tyrannosauridae	Tyrannosauridae Lateral	FMNH PR2081 "Sue"	d12	rex	Smith, 2005	Hell Creek Formation	Faith, Cheyenne River Indian Reservation	South Dakota	U.S.	Maastrichtian	Late Cretaceous	Old adult (28 yo)	Comp/	d12	Lateral	26.47	19.13	44.29	47.71	0.722705	1.67321	?	?	?	?	?	?	?	?	?	?	?	?	?	?	?	84.98	-0.01	8.5	7.5	14	9.3	10.5	13.5	10	11.1
715	Tyrannosaurus	Tyrannosaurus lateral	Tyrannosauridae	Tyrannosauridae Lateral	FMNH PR2081 "Sue"	d03	rex	Smith, 2005	Hell Creek Formation	Faith, Cheyenne River Indian Reservation	South Dakota	U.S.	Maastrichtian	Late Cretaceous	Old adult (28 yo)	Left	d03	Lateral	52.07	32.67	87.42	95.97	0.627425	1.67889	?	?	?	?	?	?	?	?	?	?	?	?	?	?	?	87.43	-0.17	8	6.5	11	7.5	6.5	11.8	8.5	8.6
716	Tyrannosaurus	Tyrannosaurus lateral	Tyrannosauridae	Tyrannosauridae Lateral	FMNH PR2081 "Sue"	d05	rex	Smith, 2005	Hell Creek Formation	Faith, Cheyenne River Indian Reservation	South Dakota	U.S.	Maastrichtian	Late Cretaceous	Old adult (28 yo)	Left	d05	Lateral	48.74	33.94	88.87	93.94	0.696348	1.82335	?	?	?	?	?	?	?	?	?	?	?	?	?	?	?	87.51	-0.14	7	7.3	10	8	7	10	8.1	8.3
717	Tyrannosaurus	Tyrannosaurus lateral	Tyrannosauridae	Tyrannosauridae Lateral	FMNH PR2081 "Sue"	d06	rex	Smith, 2005	Hell Creek Formation	Faith, Cheyenne River Indian Reservation	South Dakota	U.S.	Maastrichtian	Late Cretaceous	Old adult (28 yo)	Left	d06	Lateral	40.21	27.37	78.09	84.19	0.680676	1.94205	?	?	?	?	?	?	?	?	?	?	?	?	?	?	?	87.1	-0.08	9	9	11	8	9	11	9.7	9.3
718	Tyrannosaurus	Tyrannosaurus lateral	Tyrannosauridae	Tyrannosauridae Lateral	FMNH PR2081 "Sue"	d08	rex	Smith, 2005	Hell Creek Formation	Faith, Cheyenne River Indian Reservation	South Dakota	U.S.	Maastrichtian	Late Cretaceous	Old adult (28 yo)	Left	d08	Lateral	34.49	25.71	66.25	74.66	0.745433	1.92085	?	?	?	?	?	?	?	?	?	?	?	?	?	?	?	86.47	-0.07	6	7	14	7	8	11	9	8.7
719	Tyrannosaurus	Tyrannosaurus lateral	Tyrannosauridae	Tyrannosauridae Lateral	FMNH PR2081 "Sue"	d09	rex	Smith, 2005	Hell Creek Formation	Faith, Cheyenne River Indian Reservation	South Dakota	U.S.	Maastrichtian	Late Cretaceous	Old adult (28 yo)	Left	d09	Lateral	34.69	24.51	63.57	66.84	0.706544	1.83252	?	?	?	?	?	?	?	?	?	?	?	?	?	?	?	86.53	-0.04	7.5	8.8	14	9.8	9	13.8	10.1	10.9
720	Tyrannosaurus	Tyrannosaurus mesial	Tyrannosauridae	Tyrannosauridae Mesial	FMNH PR2081 "Sue"	Isolated, Lpmx	rex	Young et al., 2019 (C.H. pers. measurements)	Hell Creek Formation	Faith, Cheyenne River Indian Reservation	South Dakota	U.S.	Maastrichtian	Late Cretaceous	Old adult (28 yo)	Cast	Isolated, Lpmx	Mesial	16.3	35.6	57.2	60.8	2.18405	3.5092	18.1	20.4	1.12707	0	60.8	100	?	?	?	absent	absent	?	?	?	?	?	?	9	7	11.25	9.5	7	11.25	9.08	9.25
721	Tyrannosaurus	Tyrannosaurus lateral	Tyrannosauridae	Tyrannosauridae Lateral	FMNH PR2081 "Sue"	Isolated, LmxB	rex	Young et al., 2019 (C.H. pers. measurements)	Hell Creek Formation	Faith, Cheyenne River Indian Reservation	South Dakota	U.S.	Maastrichtian	Late Cretaceous	Old adult (28 yo)	Cast	Isolated, LmxB	Lateral	35	38.2	96.3	103.3	1.09143	2.75143	27.2	26.4	0.970588	19.2	84.1	81.4134	?	?	?	absent	absent	?	?	?	?	?	?	7.5	6	10	7	7.5	10	7.83	8.16
722	Tyrannosaurus	Tyrannosaurus lateral	Tyrannosauridae	Tyrannosauridae Lateral	FMNH PR2081 "Sue"	Isolated, LmxE	rex	Young et al., 2019 (C.H. pers. measurements)	Hell Creek Formation	Faith, Cheyenne River Indian Reservation	South Dakota	U.S.	Maastrichtian	Late Cretaceous	Old adult (28 yo)	Cast	Isolated, LmxE	Lateral	31	10.2	54	57.9	0.329032	1.74194	20.6	10.9	0.529126	?	?	?	?	?	?	absent	absent	?	?	?	?	?	?	6.66	8.25	12.5	8.33	9	12.5	9.13	9.74
723	Tyrannosaurus	Tyrannosaurus lateral	Tyrannosauridae	Tyrannosauridae Lateral	FMNH PR2081 "Sue"	Isolated, LmxF	rex	Young et al., 2019 (C.H. pers. measurements)	Hell Creek Formation	Faith, Cheyenne River Indian Reservation	South Dakota	U.S.	Maastrichtian	Late Cretaceous	Old adult (28 yo)	Cast	Isolated, LmxF	Lateral	21.9	14.3	34.5	35.3	0.652968	1.57534	16.2	11	0.679012	10.8	24.5	69.4051	?	?	?	absent	absent	?	?	?	?	?	?	?	?	?	?	?	?	?	?
724	Tyrannosaurus	Tyrannosaurus lateral	Tyrannosauridae	Tyrannosauridae Lateral	FMNH PR2081 "Sue"	Isolated, LmxG	rex	Young et al., 2019 (C.H. pers. measurements)	Hell Creek Formation	Faith, Cheyenne River Indian Reservation	South Dakota	U.S.	Maastrichtian	Late Cretaceous	Old adult (28 yo)	Cast	Isolated, LmxG	Lateral	14.6	6	28.3	36.5	0.410959	1.93836	11.3	5.5	0.486726	17.7	18.8	51.5068	?	?	?	absent	absent	?	?	?	?	?	?	16.25	16.875	22.5	13.33	14	?	18.54	13.665
725	Tyrannosaurus	Tyrannosaurus lateral	Tyrannosauridae	Tyrannosauridae Lateral	MOR 1125 "B-rex"	mx10	rex	Smith, 2005	Hell Creek Formation	Fort Peck Reservoir	Montana	U.S.	Maastrichtian	Late Cretaceous	Old adult	Right	mx10	Lateral	34.2	21.3	60.68	68	0.622807	1.77427	?	?	?	?	?	?	?	?	?	?	?	?	?	?	?	86.22	-0.07	8	8.5	12.5	9	9.5	12	9.7	10.2
726	Tyrannosaurus	Tyrannosaurus lateral	Tyrannosauridae	Tyrannosauridae Lateral	MOR 555 "Devil Rex"	mx07	rex	Smith, 2005	Hell Creek Formation	Charles M. Russell National Wildlife Refuge	Montana	U.S.	Maastrichtian	Late Cretaceous	Adult; Stage 4	Left	mx07	Lateral	42.86	28.35	72.67	80.21	0.661456	1.69552	?	?	?	?	?	?	?	?	?	?	?	?	?	?	?	86.9	-0.09	8.8	11.1	12	9	11	13.7	10.6	11.2
727	Tyrannosaurus	Tyrannosaurus lateral	Tyrannosauridae	Tyrannosauridae Lateral	MOR 555 "Devil Rex"	mx08	rex	Smith, 2005	Hell Creek Formation	Charles M. Russell National Wildlife Refuge	Montana	U.S.	Maastrichtian	Late Cretaceous	Adult; Stage 4	Left	mx08	Lateral	37.34	22.82	65.11	70.53	0.611141	1.74371	?	?	?	?	?	?	?	?	?	?	?	?	?	?	?	86.56	-0.07	9	9.3	13.8	9	10.4	13.1	10.7	10.8
728	Tyrannosaurus	Tyrannosaurus lateral	Tyrannosauridae	Tyrannosauridae Lateral	MOR 555 "Devil Rex"	mx09	rex	Smith, 2005	Hell Creek Formation	Charles M. Russell National Wildlife Refuge	Montana	U.S.	Maastrichtian	Late Cretaceous	Adult; Stage 4	Left	mx09	Lateral	33.72	24.44	55.11	56.72	0.724792	1.63434	?	?	?	?	?	?	?	?	?	?	?	?	?	?	?	86.09	-0.05	7.8	8.8	14	8.6	10.8	13.7	10.2	11
729	Tyrannosaurus	Tyrannosaurus lateral	Tyrannosauridae	Tyrannosauridae Lateral	MOR 008	d03	rex	Smith, 2005	Hell Creek Formation	Custer	Montana	U.S.	Maastrichtian	Late Cretaceous	Adult; Stage 4	Left	d03	Lateral	46.05	33.78	91	93	0.73355	1.97611	?	?	?	?	?	?	?	?	?	?	?	?	?	?	?	87.62	-0.1	/	8	/	12	7	11	10	9
730	Tyrannosaurus	Tyrannosaurus lateral	Tyrannosauridae	Tyrannosauridae Lateral	MOR 008	d05	rex	Smith, 2005	Hell Creek Formation	Custer	Montana	U.S.	Maastrichtian	Late Cretaceous	Adult; Stage 4	Left	d05	Lateral	39.29	31.25	78	79.5	0.795368	1.98524	?	?	?	?	?	?	?	?	?	?	?	?	?	?	?	87.23	-0.07	/	9	/	/	9	/	9	9
731	Tyrannosaurus	Tyrannosaurus lateral	Tyrannosauridae	Tyrannosauridae Lateral	MOR 008	d06	rex	Smith, 2005	Hell Creek Formation	Custer	Montana	U.S.	Maastrichtian	Late Cretaceous	Adult; Stage 4	Comp/	d06	Lateral	38.23	27.07	75	76.5	0.708083	1.96181	?	?	?	?	?	?	?	?	?	?	?	?	?	?	?	87.11	-0.07	/	8.3	/	/	8.5	6	8.3	9.3
732	Tyrannosaurus	Tyrannosaurus lateral	Tyrannosauridae	Tyrannosauridae Lateral	MOR 008	d08	rex	Smith, 2005	Hell Creek Formation	Custer	Montana	U.S.	Maastrichtian	Late Cretaceous	Adult; Stage 4	Right	d08	Lateral	35	26.6	65	67	0.76	1.85714	?	?	?	?	?	?	?	?	?	?	?	?	?	?	?	86.66	-0.06	7	?	/	/	9	/	7	9
733	Tyrannosaurus	Tyrannosaurus lateral	Tyrannosauridae	Tyrannosauridae Lateral	MOR 008	d10	rex	Smith, 2005	Hell Creek Formation	Custer	Montana	U.S.	Maastrichtian	Late Cretaceous	Adult; Stage 4	Right	d10	Lateral	31.5	21	55	56.5	0.666667	1.74603	?	?	?	?	?	?	?	?	?	?	?	?	?	?	?	86.07	-0.07	/	9	/	/	8.5	/	9	8.5
734	Tyrannosaurus	Tyrannosaurus mesial	Tyrannosauridae	Tyrannosauridae Mesial	BHI 3033 "Stan"	pm01	rex	Smith, 2005	Hell Creek Formation	Buffalo	South Dakota	U.S.	Maastrichtian	Late Cretaceous	Adult; Stage 4	Comp/	pm01	Mesial	14.27	27.38	44.22	50.21	1.91871	1.61505	?	?	?	?	?	?	?	?	?	?	?	?	?	?	?	84.85	-0.05	10.9	9.5	11.4	10.5	9.9	12.7	10.6	11
735	Tyrannosaurus	Tyrannosaurus mesial	Tyrannosauridae	Tyrannosauridae Mesial	BHI 3033 "Stan"	pm03	rex	Smith, 2005	Hell Creek Formation	Buffalo	South Dakota	U.S.	Maastrichtian	Late Cretaceous	Adult; Stage 4	Comp/	pm03	Mesial	21.75	34.87	58.66	60.01	1.60322	1.68225	?	?	?	?	?	?	?	?	?	?	?	?	?	?	?	86.33	-0.06	10.8	9.1	12.5	10	9.8	12.2	10.8	10.6
736	Tyrannosaurus	Tyrannosaurus mesial	Tyrannosauridae	Tyrannosauridae Mesial	BHI 3033 "Stan"	pm02	rex	Smith, 2005	Hell Creek Formation	Buffalo	South Dakota	U.S.	Maastrichtian	Late Cretaceous	Adult; Stage 4	Right	pm02	Mesial	18.04	31.75	50.14	56.28	1.75998	1.57921	?	?	?	?	?	?	?	?	?	?	?	?	?	?	?	85.51	-0.09	10.7	9	9	11.2	8.5	8	9.6	9.2
737	Tyrannosaurus	Tyrannosaurus mesial	Tyrannosauridae	Tyrannosauridae Mesial	BHI 3033 "Stan"	pm04	rex	Smith, 2005	Hell Creek Formation	Buffalo	South Dakota	U.S.	Maastrichtian	Late Cretaceous	Adult; Stage 4	Right	pm04	Mesial	19.03	30.05	52.8	53.94	1.57909	1.75707	?	?	?	?	?	?	?	?	?	?	?	?	?	?	?	85.92	-0.04	10.2	9	10	10	8.7	11.5	9.7	10.1
738	Tyrannosaurus	Tyrannosaurus lateral	Tyrannosauridae	Tyrannosauridae Lateral	BHI 3033 "Stan"	mx01	rex	Smith, 2005	Hell Creek Formation	Buffalo	South Dakota	U.S.	Maastrichtian	Late Cretaceous	Adult; Stage 4	Comp/	mx01	Lateral	45.88	34.97	93.68	98.79	0.762206	2.04185	?	?	?	?	?	?	?	?	?	?	?	?	?	?	?	87.62	-0.11	7.5	8	9.8	6.8	7.7	9.9	8.4	8.1
739	Tyrannosaurus	Tyrannosaurus lateral	Tyrannosauridae	Tyrannosauridae Lateral	BHI 3033 "Stan"	mx02	rex	Smith, 2005	Hell Creek Formation	Buffalo	South Dakota	U.S.	Maastrichtian	Late Cretaceous	Adult; Stage 4	Comp/	mx02	Lateral	51.98	34.23	102.21	108	0.658523	1.96633	?	?	?	?	?	?	?	?	?	?	?	?	?	?	?	87.81	-0.16	7.9	7.5	10.5	6.6	7.2	8	8.3	7.3
740	Tyrannosaurus	Tyrannosaurus lateral	Tyrannosauridae	Tyrannosauridae Lateral	BHI 3033 "Stan"	mx03	rex	Smith, 2005	Hell Creek Formation	Buffalo	South Dakota	U.S.	Maastrichtian	Late Cretaceous	Adult; Stage 4	Comp/	mx03	Lateral	48.63	33.03	115.3	118.82	0.67921	2.37096	?	?	?	?	?	?	?	?	?	?	?	?	?	?	?	88.09	-0.1	7.2	7	10.7	6.8	8.2	8.2	8.3	7.7
741	Tyrannosaurus	Tyrannosaurus lateral	Tyrannosauridae	Tyrannosauridae Lateral	BHI 3033 "Stan"	mx04	rex	Smith, 2005	Hell Creek Formation	Buffalo	South Dakota	U.S.	Maastrichtian	Late Cretaceous	Adult; Stage 4	Comp/	mx04	Lateral	49.71	29.58	103.42	110.83	0.595051	2.08047	?	?	?	?	?	?	?	?	?	?	?	?	?	?	?	87.81	-0.12	7	8.3	9.5	8.4	8	11.2	7.9	8.8
742	Tyrannosaurus	Tyrannosaurus lateral	Tyrannosauridae	Tyrannosauridae Lateral	BHI 3033 "Stan"	mx05	rex	Smith, 2005	Hell Creek Formation	Buffalo	South Dakota	U.S.	Maastrichtian	Late Cretaceous	Adult; Stage 4	Comp/	mx05	Lateral	48.15	31.47	94.89	99.43	0.653583	1.97072	?	?	?	?	?	?	?	?	?	?	?	?	?	?	?	87.67	-0.12	7	8	13.7	8.2	7	10.2	9.6	8.5
743	Tyrannosaurus	Tyrannosaurus lateral	Tyrannosauridae	Tyrannosauridae Lateral	BHI 3033 "Stan"	mx06	rex	Smith, 2005	Hell Creek Formation	Buffalo	South Dakota	U.S.	Maastrichtian	Late Cretaceous	Adult; Stage 4	Comp/	mx06	Lateral	38.48	27.2	73.7	79.43	0.706861	1.91528	?	?	?	?	?	?	?	?	?	?	?	?	?	?	?	86.93	-0.07	7.5	4.7	6	4	4.5	10.8	8.4	9.6
744	Tyrannosaurus	Tyrannosaurus lateral	Tyrannosauridae	Tyrannosauridae Lateral	BHI 3033 "Stan"	mx08	rex	Smith, 2005	Hell Creek Formation	Buffalo	South Dakota	U.S.	Maastrichtian	Late Cretaceous	Adult; Stage 4	Comp/	mx08	Lateral	29.25	19.01	48.55	56.35	0.649915	1.65983	?	?	?	?	?	?	?	?	?	?	?	?	?	?	?	85.01	-0.07	7.8	10.3	12.8	8.1	10.2	10	10.3	9.4
745	Tyrannosaurus	Tyrannosaurus lateral	Tyrannosauridae	Tyrannosauridae Lateral	BHI 3033 "Stan"	mx09	rex	Smith, 2005	Hell Creek Formation	Buffalo	South Dakota	U.S.	Maastrichtian	Late Cretaceous	Adult; Stage 4	Comp/	mx09	Lateral	32.08	21.86	55.34	56.57	0.681421	1.72506	?	?	?	?	?	?	?	?	?	?	?	?	?	?	?	86.11	-0.04	8.5	9.5	12.6	9.5	9.9	12.3	10.2	10.6
746	Tyrannosaurus	Tyrannosaurus lateral	Tyrannosauridae	Tyrannosauridae Lateral	BHI 3033 "Stan"	mx11	rex	Smith, 2005	Hell Creek Formation	Buffalo	South Dakota	U.S.	Maastrichtian	Late Cretaceous	Adult; Stage 4	Left	mx11	Lateral	21.25	14.57	31.96	32.14	0.685647	1.504	?	?	?	?	?	?	?	?	?	?	?	?	?	?	?	83.34	0.02	10	15.1	15.2	10.9	14	14.7	13.4	13.2
747	Tyrannosaurus	Tyrannosaurus lateral	Tyrannosauridae	Tyrannosauridae Lateral	BHI 3033 "Stan"	mx07	rex	Smith, 2005	Hell Creek Formation	Buffalo	South Dakota	U.S.	Maastrichtian	Late Cretaceous	Adult; Stage 4	Right	mx07	Lateral	40.19	23.64	66.28	69.94	0.588206	1.64917	?	?	?	?	?	?	?	?	?	?	?	?	?	?	?	86.7	-0.11	9	8.5	14.3	8.9	9	11.8	10.6	9.9
748	Tyrannosaurus	Tyrannosaurus mesial	Tyrannosauridae	Tyrannosauridae Mesial	BHI 3033 "Stan"	d01	rex	Smith, 2005	Hell Creek Formation	Buffalo	South Dakota	U.S.	Maastrichtian	Late Cretaceous	Adult; Stage 4	Comp/	d01	Mesial	26.23	18.32	45.17	46.31	0.698437	1.72207	?	?	?	?	?	?	?	?	?	?	?	?	?	?	?	85.22	-0.03	9.5	9	10.4	8.8	8.9	10.5	9.6	9.4
749	Tyrannosaurus	Tyrannosaurus mesial	Tyrannosauridae	Tyrannosauridae Mesial	BHI 3033 "Stan"	d02	rex	Smith, 2005	Hell Creek Formation	Buffalo	South Dakota	U.S.	Maastrichtian	Late Cretaceous	Adult; Stage 4	Comp/	d02	Mesial	40.66	26.36	71.99	78.02	0.648303	1.77054	?	?	?	?	?	?	?	?	?	?	?	?	?	?	?	86.89	-0.11	8.8	7	9.4	8.4	8.2	9.4	8.4	8.6
750	Tyrannosaurus	Tyrannosaurus lateral	Tyrannosauridae	Tyrannosauridae Lateral	BHI 3033 "Stan"	d03	rex	Smith, 2005	Hell Creek Formation	Buffalo	South Dakota	U.S.	Maastrichtian	Late Cretaceous	Adult; Stage 4	Comp/	d03	Lateral	46.2	32.7	94.97	96	0.707792	2.05563	?	?	?	?	?	?	?	?	?	?	?	?	?	?	?	86.89	-0.15	6	7	11	7.5	7	7	8	7.2
751	Tyrannosaurus	Tyrannosaurus lateral	Tyrannosauridae	Tyrannosauridae Lateral	BHI 3033 "Stan"	d04	rex	Smith, 2005	Hell Creek Formation	Buffalo	South Dakota	U.S.	Maastrichtian	Late Cretaceous	Adult; Stage 4	Comp/	d04	Lateral	46.28	31.88	89.01	90.85	0.68885	1.92329	?	?	?	?	?	?	?	?	?	?	?	?	?	?	?	87.56	-0.11	7	7.3	8.6	8	7.7	10.4	7.6	8.7
752	Tyrannosaurus	Tyrannosaurus lateral	Tyrannosauridae	Tyrannosauridae Lateral	BHI 3033 "Stan"	d06	rex	Smith, 2005	Hell Creek Formation	Buffalo	South Dakota	U.S.	Maastrichtian	Late Cretaceous	Adult; Stage 4	Comp/	d06	Lateral	37.65	27.74	62.01	66.1	0.736786	1.64701	?	?	?	?	?	?	?	?	?	?	?	?	?	?	?	86.44	-0.13	7.4	7.7	9.4	8.4	8	9.6	8.1	8.7
753	Tyrannosaurus	Tyrannosaurus lateral	Tyrannosauridae	Tyrannosauridae Lateral	BHI 3033 "Stan"	d07	rex	Smith, 2005	Hell Creek Formation	Buffalo	South Dakota	U.S.	Maastrichtian	Late Cretaceous	Adult; Stage 4	Comp/	d07	Lateral	33.38	23.15	50.54	53.48	0.693529	1.51408	?	?	?	?	?	?	?	?	?	?	?	?	?	?	?	85.65	-0.08	9.1	8.5	11	9	9.4	13.4	9.5	9.9
754	Tyrannosaurus	Tyrannosaurus lateral	Tyrannosauridae	Tyrannosauridae Lateral	BHI 3033 "Stan"	d09	rex	Smith, 2005	Hell Creek Formation	Buffalo	South Dakota	U.S.	Maastrichtian	Late Cretaceous	Adult; Stage 4	Comp/	d09	Lateral	30.62	21.42	46.83	50.62	0.699543	1.52939	?	?	?	?	?	?	?	?	?	?	?	?	?	?	?	85.29	-0.07	7.7	8.9	11	9.1	9.2	10.9	9.2	9.7
755	Tyrannosaurus	Tyrannosaurus lateral	Tyrannosauridae	Tyrannosauridae Lateral	BHI 3033 "Stan"	d10	rex	Smith, 2005	Hell Creek Formation	Buffalo	South Dakota	U.S.	Maastrichtian	Late Cretaceous	Adult; Stage 4	Comp/	d10	Lateral	28.05	20.44	41.56	45.04	0.728699	1.48164	?	?	?	?	?	?	?	?	?	?	?	?	?	?	?	84.71	-0.05	8.7	9.9	12.8	9.2	10.4	13.5	10.5	11
756	Tyrannosaurus	Tyrannosaurus lateral	Tyrannosauridae	Tyrannosauridae Lateral	BHI 3033 "Stan"	d13	rex	Smith, 2005	Hell Creek Formation	Buffalo	South Dakota	U.S.	Maastrichtian	Late Cretaceous	Adult; Stage 4	Left	d13	Lateral	15.01	9.22	15.85	17.41	0.614257	1.05596	?	?	?	?	?	?	?	?	?	?	?	?	?	?	?	76.45	-0.02	13.6	13.6	16.1	15.4	15.7	16	14.4	15.7
757	Tyrannosaurus	Tyrannosaurus lateral	Tyrannosauridae	Tyrannosauridae Lateral	BHI 3033 "Stan"	d05	rex	Smith, 2005	Hell Creek Formation	Buffalo	South Dakota	U.S.	Maastrichtian	Late Cretaceous	Adult; Stage 4	Right	d05	Lateral	45.89	32.17	77.74	78.96	0.701024	1.69405	?	?	?	?	?	?	?	?	?	?	?	?	?	?	?	87.25	-0.13	6.5	8	10.3	9	7	11	8.3	9
758	Tyrannosaurus	Tyrannosaurus lateral	Tyrannosauridae	Tyrannosauridae Lateral	BHI 3033 "Stan"	d08	rex	Smith, 2005	Hell Creek Formation	Buffalo	South Dakota	U.S.	Maastrichtian	Late Cretaceous	Adult; Stage 4	Right	d08	Lateral	33.12	24.75	54.12	56.48	0.747283	1.63406	?	?	?	?	?	?	?	?	?	?	?	?	?	?	?	85.98	-0.04	8	9	13.8	9	10	14.9	10.3	11.3
759	Tyrannosaurus	Tyrannosaurus lateral	Tyrannosauridae	Tyrannosauridae Lateral	BHI 3033 "Stan"	d11	rex	Smith, 2005	Hell Creek Formation	Buffalo	South Dakota	U.S.	Maastrichtian	Late Cretaceous	Adult; Stage 4	Right	d11	Lateral	23.64	16.61	30.34	33.09	0.702623	1.28342	?	?	?	?	?	?	?	?	?	?	?	?	?	?	?	82.84	-0.05	11	11	13.8	11	10.9	12.9	11.9	11.6
760	Tyrannosaurus	Tyrannosaurus lateral	Tyrannosauridae	Tyrannosauridae Lateral	BHI 3033 "Stan"	d12	rex	Smith, 2005	Hell Creek Formation	Buffalo	South Dakota	U.S.	Maastrichtian	Late Cretaceous	Adult; Stage 4	Right	d12	Lateral	18.52	13.56	21.91	24.25	0.732181	1.18305	?	?	?	?	?	?	?	?	?	?	?	?	?	?	?	80.12	-0.01	11.2	14.1	15.9	13	14	14.9	13.7	14
761	Tyrannosaurus	Tyrannosaurus mesial	Tyrannosauridae	Tyrannosauridae Mesial	AMNH 5027	pm01	rex	Smith, 2005	Hell Creek Formation?	Jordan, Dawson County	Montana	U.S.	Maastrichtian	Late Cretaceous	Adult; Stage 4	Comp/	pm01	Mesial	16.45	29.84	42.55	50.21	1.81398	1.42594	?	?	?	?	?	?	?	?	?	?	?	?	?	?	?	84.59	-0.09	10	9.1	11	10	9.6	11.6	10	10.4
762	Tyrannosaurus	Tyrannosaurus mesial	Tyrannosauridae	Tyrannosauridae Mesial	AMNH 5027	pm03	rex	Smith, 2005	Hell Creek Formation?	Jordan, Dawson County	Montana	U.S.	Maastrichtian	Late Cretaceous	Adult; Stage 4	Comp/	pm03	Mesial	19.46	30.94	45.42	58.26	1.58993	1.468	?	?	?	?	?	?	?	?	?	?	?	?	?	?	?	84.83	-0.09	10.5	8.5	11	10.5	9.5	11.5	10	10.5
763	Tyrannosaurus	Tyrannosaurus mesial	Tyrannosauridae	Tyrannosauridae Mesial	AMNH 5027	pm02	rex	Smith, 2005	Hell Creek Formation?	Jordan, Dawson County	Montana	U.S.	Maastrichtian	Late Cretaceous	Adult; Stage 4	Right	pm02	Mesial	16.94	29.93	43.64	54.33	1.76682	1.45807	?	?	?	?	?	?	?	?	?	?	?	?	?	?	?	84.7	-0.1	10.3	8.2	9	11	8	8.9	9.2	9.3
764	Tyrannosaurus	Tyrannosaurus mesial	Tyrannosauridae	Tyrannosauridae Mesial	AMNH 5027	pm04	rex	Smith, 2005	Hell Creek Formation?	Jordan, Dawson County	Montana	U.S.	Maastrichtian	Late Cretaceous	Adult; Stage 4	Right	pm04	Mesial	21.18	31.86	54.62	60.01	1.50425	1.71438	?	?	?	?	?	?	?	?	?	?	?	?	?	?	?	85.87	-0.06	10.8	9	9.2	11.2	8.9	10	9.7	10
765	Tyrannosaurus	Tyrannosaurus mesial	Tyrannosauridae	Tyrannosauridae Mesial	AMNH 5027	mx01	rex	Smith, 2005	Hell Creek Formation?	Jordan, Dawson County	Montana	U.S.	Maastrichtian	Late Cretaceous	Adult; Stage 4	Comp/	mx01	Mesial	38.89	31.57	85.47	93.14	0.811777	2.19774	?	?	?	?	?	?	?	?	?	?	?	?	?	?	?	87.28	-0.06	7	7.5	8.7	7	8.4	10	7.7	8.5
766	Tyrannosaurus	Tyrannosaurus lateral	Tyrannosauridae	Tyrannosauridae Lateral	AMNH 5027	mx03	rex	Smith, 2005	Hell Creek Formation?	Jordan, Dawson County	Montana	U.S.	Maastrichtian	Late Cretaceous	Adult; Stage 4	Comp/	mx03	Lateral	41.46	30.59	103.98	109.25	0.73782	2.50796	?	?	?	?	?	?	?	?	?	?	?	?	?	?	?	87.81	-0.04	7	6.9	10.3	8.9	7.8	10.3	8.1	9
767	Tyrannosaurus	Tyrannosaurus lateral	Tyrannosauridae	Tyrannosauridae Lateral	AMNH 5027	mx05	rex	Smith, 2005	Hell Creek Formation?	Jordan, Dawson County	Montana	U.S.	Maastrichtian	Late Cretaceous	Adult; Stage 4	Comp/	mx05	Lateral	48.6	31.17	102.44	104.79	0.641358	2.10782	?	?	?	?	?	?	?	?	?	?	?	?	?	?	?	87.87	-0.11	7.2	7	12.1	7.8	7.5	12.3	8.8	9.2
768	Tyrannosaurus	Tyrannosaurus lateral	Tyrannosauridae	Tyrannosauridae Lateral	AMNH 5027	mx06	rex	Smith, 2005	Hell Creek Formation?	Jordan, Dawson County	Montana	U.S.	Maastrichtian	Late Cretaceous	Adult; Stage 4	Comp/	mx06	Lateral	38.37	24.42	77.64	88.33	0.636435	2.02346	?	?	?	?	?	?	?	?	?	?	?	?	?	?	?	86.99	-0.08	8.5	8	11.1	8	7.4	11.4	9.2	8.9
769	Tyrannosaurus	Tyrannosaurus lateral	Tyrannosauridae	Tyrannosauridae Lateral	AMNH 5027	mx07	rex	Smith, 2005	Hell Creek Formation?	Jordan, Dawson County	Montana	U.S.	Maastrichtian	Late Cretaceous	Adult; Stage 4	Comp/	mx07	Lateral	40.01	25.31	79.7	84.23	0.632592	1.992	?	?	?	?	?	?	?	?	?	?	?	?	?	?	?	87.32	-0.09	9	8.6	10.4	8	7.4	11	9.3	8.8
770	Tyrannosaurus	Tyrannosaurus lateral	Tyrannosauridae	Tyrannosauridae Lateral	AMNH 5027	mx08	rex	Smith, 2005	Hell Creek Formation?	Jordan, Dawson County	Montana	U.S.	Maastrichtian	Late Cretaceous	Adult; Stage 4	Comp/	mx08	Lateral	37.54	26.05	82.14	84.04	0.693926	2.18807	?	?	?	?	?	?	?	?	?	?	?	?	?	?	?	87.35	-0.05	9.3	8.3	10.3	9.1	8.3	10	9.3	9.1
771	Tyrannosaurus	Tyrannosaurus lateral	Tyrannosauridae	Tyrannosauridae Lateral	AMNH 5027	mx11	rex	Smith, 2005	Hell Creek Formation?	Jordan, Dawson County	Montana	U.S.	Maastrichtian	Late Cretaceous	Adult; Stage 4	Right	mx11	Lateral	25.92	16.46	37.57	42.72	0.635031	1.44946	?	?	?	?	?	?	?	?	?	?	?	?	?	?	?	84.05	-0.04	9.5	10	11	10.5	10.5	14	10.2	11.7
772	Tyrannosaurus	Tyrannosaurus lateral	Tyrannosauridae	Tyrannosauridae Lateral	AMNH 5027	mx04	rex	Smith, 2005	Hell Creek Formation?	Jordan, Dawson County	Montana	U.S.	Maastrichtian	Late Cretaceous	Adult; Stage 4	Left	mx04	Lateral	50.01	33.93	104.06	115.51	0.678464	2.08078	?	?	?	?	?	?	?	?	?	?	?	?	?	?	?	87.75	-0.13	7	8.5	10	7.5	8	10	7.8	7.8
773	Tyrannosaurus	Tyrannosaurus lateral	Tyrannosauridae	Tyrannosauridae Lateral	SDSM 12047	mx01	rex	Smith, 2005	Hell Creek Formation	Floden's ranch, Butte County	South Dakota	U.S.	Maastrichtian	Late Cretaceous	Subadult	Left	mx01	Lateral	49.49	34.82	100.89	103.67	0.703576	2.03859	?	?	?	?	?	?	?	?	?	?	?	?	?	?	?	87.84	-0.14	9.5	7	10.5	7	6.5	8	9	7.2
774	Tyrannosaurus	Tyrannosaurus lateral	Tyrannosauridae	Tyrannosauridae Lateral	SDSM 12047	mx02	rex	Smith, 2005	Hell Creek Formation	Floden's ranch, Butte County	South Dakota	U.S.	Maastrichtian	Late Cretaceous	Subadult	Left	mx02	Lateral	36.77	28.68	81.6	88.33	0.779984	2.2192	?	?	?	?	?	?	?	?	?	?	?	?	?	?	?	87.16	-0.05	7.5	7	8	6.5	7	11.5	7.5	8.3
775	Tyrannosaurus	Tyrannosaurus lateral	Tyrannosauridae	Tyrannosauridae Lateral	SDSM 12047	mx03	rex	Smith, 2005	Hell Creek Formation	Floden's ranch, Butte County	South Dakota	U.S.	Maastrichtian	Late Cretaceous	Subadult	Left	mx03	Lateral	47.17	32.77	117.06	120.69	0.694721	2.48166	?	?	?	?	?	?	?	?	?	?	?	?	?	?	?	88.11	-0.09	7.5	7	11	6.5	7.5	8.5	8.5	7.5
776	Tyrannosaurus	Tyrannosaurus lateral	Tyrannosauridae	Tyrannosauridae Lateral	SDSM 12047	mx04	rex	Smith, 2005	Hell Creek Formation	Floden's ranch, Butte County	South Dakota	U.S.	Maastrichtian	Late Cretaceous	Subadult	Left	mx04	Lateral	46.68	36.68	108.53	116.36	0.785775	2.32498	?	?	?	?	?	?	?	?	?	?	?	?	?	?	?	87.88	-0.09	7.5	7	11	7	6.7	10.5	8.5	8.1
777	Tyrannosaurus	Tyrannosaurus lateral	Tyrannosauridae	Tyrannosauridae Lateral	SDSM 12047	mx08	rex	Smith, 2005	Hell Creek Formation	Floden's ranch, Butte County	South Dakota	U.S.	Maastrichtian	Late Cretaceous	Subadult	Comp/	mx08	Lateral	43.6	27.5	87.85	105.7	0.630734	2.01491	?	?	?	?	?	?	?	?	?	?	?	?	?	?	?	87.18	-0.11	7.5	8	11	7	8	11	8.8	8.7
778	Tyrannosaurus	Tyrannosaurus lateral	Tyrannosauridae	Tyrannosauridae Lateral	SDSM 12047	mx10	rex	Smith, 2005	Hell Creek Formation	Floden's ranch, Butte County	South Dakota	U.S.	Maastrichtian	Late Cretaceous	Subadult	Left	mx10	Lateral	42.51	26.68	91.27	103.51	0.627617	2.14702	?	?	?	?	?	?	?	?	?	?	?	?	?	?	?	87.37	-0.09	8	8	11	7	7.8	10.7	9	8.5
779	Tyrannosaurus	Tyrannosaurus lateral	Tyrannosauridae	Tyrannosauridae Lateral	SDSM 12047	mx11	rex	Smith, 2005	Hell Creek Formation	Floden's ranch, Butte County	South Dakota	U.S.	Maastrichtian	Late Cretaceous	Subadult	Comp/	mx11	Lateral	30.97	20.17	51.14	57.92	0.651275	1.65128	?	?	?	?	?	?	?	?	?	?	?	?	?	?	?	85.4	-0.08	8.5	7.8	9.5	9.3	8.5	10	8.6	9.3
780	Tyrannosaurus	Tyrannosaurus lateral	Tyrannosauridae	Tyrannosauridae Lateral	SDSM 12047	mx06	rex	Smith, 2005	Hell Creek Formation	Floden's ranch, Butte County	South Dakota	U.S.	Maastrichtian	Late Cretaceous	Subadult	Right	mx06	Lateral	48	33.14	105.46	116.94	0.690417	2.19708	?	?	?	?	?	?	?	?	?	?	?	?	?	?	?	87.76	-0.11	6	?	/	/	7	/	0	8
781	Tyrannosaurus	Tyrannosaurus lateral	Tyrannosauridae	Tyrannosauridae Lateral	SDSM 12047	mx12	rex	Smith, 2005	Hell Creek Formation	Floden's ranch, Butte County	South Dakota	U.S.	Maastrichtian	Late Cretaceous	Subadult	Right	mx12	Lateral	22.5	12.83	32.08	39.31	0.570222	1.42578	?	?	?	?	?	?	?	?	?	?	?	?	?	?	?	82.87	-0.07	8.5	9	12.5	7.5	9	11	10	9.2
782	Tyrannosaurus	Tyrannosaurus lateral	Tyrannosauridae	Tyrannosauridae Lateral	SDSM 12047	d04	rex	Smith, 2005	Hell Creek Formation	Floden's ranch, Butte County	South Dakota	U.S.	Maastrichtian	Late Cretaceous	Subadult	Left	d04	Lateral	44.9	32.89	105.61	115.88	0.732517	2.35212	?	?	?	?	?	?	?	?	?	?	?	?	?	?	?	87.75	-0.09	/	?	/	7.5	6.7	9	/	7.7
783	Tyrannosaurus	Tyrannosaurus lateral	Tyrannosauridae	Tyrannosauridae Lateral	SDSM 12047	d05	rex	Smith, 2005	Hell Creek Formation	Floden's ranch, Butte County	South Dakota	U.S.	Maastrichtian	Late Cretaceous	Subadult	Comp/	d05	Lateral	42.37	28.11	96.28	98.9	0.663441	2.27236	?	?	?	?	?	?	?	?	?	?	?	?	?	?	?	87.72	-0.08	7.8	6.9	10.5	8.5	7.5	9.1	8.4	8.4
784	Tyrannosaurus	Tyrannosaurus lateral	Tyrannosauridae	Tyrannosauridae Lateral	SDSM 12047	d06	rex	Smith, 2005	Hell Creek Formation	Floden's ranch, Butte County	South Dakota	U.S.	Maastrichtian	Late Cretaceous	Subadult	Comp/	d06	Lateral	40.22	28.37	82.23	93.04	0.70537	2.04451	?	?	?	?	?	?	?	?	?	?	?	?	?	?	?	87.11	-0.09	8	7	10	8	7	10.5	8.3	8.5
785	Tyrannosaurus	Tyrannosaurus lateral	Tyrannosauridae	Tyrannosauridae Lateral	SDSM 12047	d07	rex	Smith, 2005	Hell Creek Formation	Floden's ranch, Butte County	South Dakota	U.S.	Maastrichtian	Late Cretaceous	Subadult	Left	d07	Lateral	39.1	26.46	74.66	80.16	0.676726	1.90946	?	?	?	?	?	?	?	?	?	?	?	?	?	?	?	86.99	-0.06	7.2	8	12	8	9	15	9.1	10.7
786	Tyrannosaurus	Tyrannosaurus lateral	Tyrannosauridae	Tyrannosauridae Lateral	SDSM 12047	d08	rex	Smith, 2005	Hell Creek Formation	Floden's ranch, Butte County	South Dakota	U.S.	Maastrichtian	Late Cretaceous	Subadult	Comp/	d08	Lateral	34.77	25.6	68.24	75.89	0.736267	1.96261	?	?	?	?	?	?	?	?	?	?	?	?	?	?	?	86.59	-0.06	6.9	7.5	10.3	8.1	7.5	11.4	8.2	9
787	Tyrannosaurus	Tyrannosaurus lateral	Tyrannosauridae	Tyrannosauridae Lateral	SDSM 12047	d09	rex	Smith, 2005	Hell Creek Formation	Floden's ranch, Butte County	South Dakota	U.S.	Maastrichtian	Late Cretaceous	Subadult	Comp/	d09	Lateral	30.92	20.59	55.57	63.53	0.665912	1.79722	?	?	?	?	?	?	?	?	?	?	?	?	?	?	?	85.81	-0.04	7.5	8	12.5	9.5	8.5	12.8	9.3	10.3
788	Tyrannosaurus	Tyrannosaurus mesial	Tyrannosauridae	Tyrannosauridae Mesial	SDSM 12047	d03	rex	Smith, 2005	Hell Creek Formation	Floden's ranch, Butte County	South Dakota	U.S.	Maastrichtian	Late Cretaceous	Subadult	Right	d03	Mesial	46.11	30.97	99.03	109.1	0.671655	2.14769	?	?	?	?	?	?	?	?	?	?	?	?	?	?	?	87.64	-0.12	9	7.2	9.2	7.8	7	8	8.5	7.6
789	Tyrannosaurus	Tyrannosaurus mesial	Tyrannosauridae	Tyrannosauridae Mesial	CM 9380	d2	rex	Hendrickx et al., 2015	Hell Creek Formation	Garfield County, Lance	Montana	U.S.	Maastrichtian	Late Cretaceous	Adult; Stage 4	Left	d2	Mesial	30.6	44.5	82.8	103.2	1.45425	2.70588	26.4	28.7	1.08712	34.6	68.6	66.4729	3	present	?	absent	absent	?	?	?	?	?	?		6.5			8
790	Tyrannosaurus	Tyrannosaurus lateral	Tyrannosauridae	Tyrannosauridae Lateral	CM 9380	d4	rex	Hendrickx et al., 2015	Hell Creek Formation	Garfield County, Lance	Montana	U.S.	Maastrichtian	Late Cretaceous	Adult; Stage 4	Left	d4	Lateral	43.4	37.6	93.5	99.6	0.866359	2.15438	30	25.9	0.863333	58.4	41.2	41.3655	0	absent	?	absent	absent	?	?	?	?	?	?		6.5			6.5
791	Tyrannosaurus	Tyrannosaurus lateral	Tyrannosauridae	Tyrannosauridae Lateral	CM 9380	d6	rex	Hendrickx et al., 2015	Hell Creek Formation	Garfield County, Lance	Montana	U.S.	Maastrichtian	Late Cretaceous	Adult; Stage 4	Left	d6	Lateral	38.4	32.6	77	85.1	0.848958	2.00521	29.4	24.1	0.819728	38.1	47	55.2291	?	?	?	absent	absent	?	?	?	?	?	?		6.5			8
792	Tyrannosaurus	Tyrannosaurus lateral	Tyrannosauridae	Tyrannosauridae Lateral	CM 9380	d7	rex	Hendrickx et al., 2015	Hell Creek Formation	Garfield County, Lance	Montana	U.S.	Maastrichtian	Late Cretaceous	Adult; Stage 4	Left	d7	Lateral	34.2	28.3	66.9	67.9	0.827485	1.95614	26.3	19.5	0.741445	23.3	44.6	65.6848	?	?	?	absent	absent	?	?	?	?	?	?		7.5			8
793	Tyrannosaurus	Tyrannosaurus lateral	Tyrannosauridae	Tyrannosauridae Lateral	CM 9380	d12	rex	Hendrickx et al., 2015	Hell Creek Formation	Garfield County, Lance	Montana	U.S.	Maastrichtian	Late Cretaceous	Adult; Stage 4	Left	d12	Lateral	20.2	15.8	26.2	28.3	0.782178	1.29703	14.6	9.9	0.678082	3.5	24.8	87.6325	?	?	?	absent	absent	?	?	?	?	?	?		11			12
794	Tyrannosaurus	Tyrannosaurus mesial	Tyrannosauridae	Tyrannosauridae Mesial	CM 9380	d1	rex	Hendrickx et al., 2015	Hell Creek Formation	Garfield County, Lance	Montana	U.S.	Maastrichtian	Late Cretaceous	Adult; Stage 4	Right	d1	Mesial	16.5	23.6	37.2	36.2	1.4303	2.25455	13.6	15.5	1.13971	0	36.2	100	?	?	?	absent	absent	?	?	?	?	?	?		?			8
795	Tyrannosaurus	Tyrannosaurus mesial	Tyrannosauridae	Tyrannosauridae Mesial	CM 9380	d3	rex	Hendrickx et al., 2015	Hell Creek Formation	Garfield County, Lance	Montana	U.S.	Maastrichtian	Late Cretaceous	Adult; Stage 4	Right	d3	Mesial	38.1	48.6	95.6	112.3	1.27559	2.50919	30.6	30.2	0.986928	40.6	71.7	63.8468	?	?	?	absent	absent	?	?	?	?	?	?		6.5			7
796	Tyrannosaurus	Tyrannosaurus lateral	Tyrannosauridae	Tyrannosauridae Lateral	CM 9380	d5	rex	Hendrickx et al., 2015	Hell Creek Formation	Garfield County, Lance	Montana	U.S.	Maastrichtian	Late Cretaceous	Adult; Stage 4	Right	d5	Lateral	40.4	42.1	87.7	84.4	1.04208	2.17079	29.4	24.2	0.823129	34.9	49.5	58.6493	?	?	?	absent	absent	?	?	?	?	?	?		7			7.5
797	Tyrannosaurus	Tyrannosaurus lateral	Tyrannosauridae	Tyrannosauridae Lateral	CM 9380	d7	rex	Hendrickx et al., 2015	Hell Creek Formation	Garfield County, Lance	Montana	U.S.	Maastrichtian	Late Cretaceous	Adult; Stage 4	Right	d7	Lateral	35.7	31.7	67.7	74.8	0.887955	1.89636	27.4	21.7	0.791971	8.6	66.2	88.5027	?	?	?	absent	absent	?	?	?	?	?	?		8			9
798	Tyrannosaurus	Tyrannosaurus lateral	Tyrannosauridae	Tyrannosauridae Lateral	CM 9380	d8	rex	Pers. obs.	Hell Creek Formation	Garfield County, Lance	Montana	U.S.	Maastrichtian	Late Cretaceous	Adult; Stage 4	Right	d8	Lateral	34.8	26.4	67.8	66	0.7586	1.94828	26.7	18.4	0.689139	?	?	?	?	?	?	absent	absent	?	?	?	?	?	?		9.5			9
799	Tyrannosaurus	Tyrannosaurus lateral	Tyrannosauridae	Tyrannosauridae Lateral	CM 9380	d10	rex	Hendrickx et al., 2015	Hell Creek Formation	Garfield County, Lance	Montana	U.S.	Maastrichtian	Late Cretaceous	Adult; Stage 4	Right	d10	Lateral	29.1	22.1	46.4	52	0.75945	1.5945	22.4	15.1	0.674107	15.5	36.5	70.1923	?	?	?	absent	absent	?	?	?	?	?	?		9			9
800	Tyrannosaurus	Tyrannosaurus mesial	Tyrannosauridae	Tyrannosauridae Mesial	CM 9380	d02	rex	Smith, 2005	Hell Creek Formation	Garfield County, Lance	Montana	U.S.	Maastrichtian	Late Cretaceous	Adult; Stage 4	Left	d02	Mesial	42.34	30.87	86.64	87.83	0.729098	2.04629	?	?	?	?	?	?	?	?	?	?	?	?	?	?	?	87.52	-0.07	/	?	/	10	?	8	/	9.7
801	Tyrannosaurus	Tyrannosaurus lateral	Tyrannosauridae	Tyrannosauridae Lateral	CM 9380	d04	rex	Smith, 2005	Hell Creek Formation	Garfield County, Lance	Montana	U.S.	Maastrichtian	Late Cretaceous	Adult; Stage 4	Left	d04	Lateral	51.1	38.04	92.07	104.05	0.744423	1.80176	?	?	?	?	?	?	?	?	?	?	?	?	?	?	?	87.49	-0.14	/	?	/	/	9	/	/	9
802	Tyrannosaurus	Tyrannosaurus lateral	Tyrannosauridae	Tyrannosauridae Lateral	CM 9380	d06	rex	Smith, 2005	Hell Creek Formation	Garfield County, Lance	Montana	U.S.	Maastrichtian	Late Cretaceous	Adult; Stage 4	Left	d06	Lateral	46.93	35.35	82.01	87.03	0.75325	1.7475	?	?	?	?	?	?	?	?	?	?	?	?	?	?	?	87.31	-0.11	7.5	9	11	9	10	10	9.2	9.7
803	Tyrannosaurus	Tyrannosaurus lateral	Tyrannosauridae	Tyrannosauridae Lateral	CM 9380	d07	rex	Smith, 2005	Hell Creek Formation	Garfield County, Lance	Montana	U.S.	Maastrichtian	Late Cretaceous	Adult; Stage 4	Comp/	d07	Lateral	41.69	31.29	70.93	78.07	0.75054	1.70137	?	?	?	?	?	?	?	?	?	?	?	?	?	?	?	86.82	-0.1	9.5	9	11.5	8.8	8.5	11.9	9.8	9.8
804	Tyrannosaurus	Tyrannosaurus lateral	Tyrannosauridae	Tyrannosauridae Lateral	CM 9380	d12	rex	Smith, 2005	Hell Creek Formation	Garfield County, Lance	Montana	U.S.	Maastrichtian	Late Cretaceous	Adult; Stage 4	Left	d12	Lateral	21.5	16.32	34.05	37.1	0.75907	1.58372	?	?	?	?	?	?	?	?	?	?	?	?	?	?	?	83.47	0.02	10	10	12.5	12	13	11.8	10.8	12.3
805	Tyrannosaurus	Tyrannosaurus mesial	Tyrannosauridae	Tyrannosauridae Mesial	CM 9380	d01	rex	Smith, 2005	Hell Creek Formation	Garfield County, Lance	Montana	U.S.	Maastrichtian	Late Cretaceous	Adult; Stage 4	Right	d01	Mesial	25.56	18.09	35.01	40.02	0.707746	1.36972	?	?	?	?	?	?	?	?	?	?	?	?	?	?	?	83.66	-0.05	10	9.5	12	12	11	11.8	10	11.6
806	Tyrannosaurus	Tyrannosaurus mesial	Tyrannosauridae	Tyrannosauridae Mesial	CM 9380	d03	rex	Smith, 2005	Hell Creek Formation	Garfield County, Lance	Montana	U.S.	Maastrichtian	Late Cretaceous	Adult; Stage 4	Right	d03	Mesial	48.46	37.48	97.52	102.32	0.773421	2.01238	?	?	?	?	?	?	?	?	?	?	?	?	?	?	?	87.73	-0.09	9	8	12	10	7.5	11.2	9.7	9.6
807	Tyrannosaurus	Tyrannosaurus lateral	Tyrannosauridae	Tyrannosauridae Lateral	CM 9380	d05	rex	Smith, 2005	Hell Creek Formation	Garfield County, Lance	Montana	U.S.	Maastrichtian	Late Cretaceous	Adult; Stage 4	Right	d05	Lateral	47.34	37.21	96.12	100.54	0.786016	2.03042	?	?	?	?	?	?	?	?	?	?	?	?	?	?	?	87.7	-0.07	11.5	8.5	13	12	9	11	11	10.7
808	Tyrannosaurus	Tyrannosaurus lateral	Tyrannosauridae	Tyrannosauridae Lateral	CM 9380	d08	rex	Smith, 2005	Hell Creek Formation	Garfield County, Lance	Montana	U.S.	Maastrichtian	Late Cretaceous	Adult; Stage 4	Right	d08	Lateral	39.08	28.71	68.04	72	0.734647	1.74104	?	?	?	?	?	?	?	?	?	?	?	?	?	?	?	86.76	-0.05	8	8	11.5	9	11	16	9.2	12
809	Tyrannosaurus	Tyrannosaurus lateral	Tyrannosauridae	Tyrannosauridae Lateral	CM 9380	d10	rex	Smith, 2005	Hell Creek Formation	Garfield County, Lance	Montana	U.S.	Maastrichtian	Late Cretaceous	Adult; Stage 4	Right	d10	Lateral	30.2	23.9	51.94	62.75	0.791391	1.71987	?	?	?	?	?	?	?	?	?	?	?	?	?	?	?	85.41	-0.01	/	9	/	8	?	/	9	12.5
810	Tyrannosaurus	Tyrannosaurus lateral	Tyrannosauridae	Tyrannosauridae Lateral	BMNH R7994 (formely AMNH 5866)	d07	rex	Hendrickx et al., 2015	Lance Formation	Weston County	Wyoming	U.S.	Maastrichtian	Late Cretaceous	Adult; Stage 4	Left	d07	Lateral	35.72	25.63	59.32	72.66	0.717525	1.66069	26.05	19.81	0.760461	11.18	61.48	84.6133	0	absent on lingual side	?	absent	absent	?	?	?	?	?	?		9			?
811	Tyrannosaurus	Tyrannosaurus lateral	Tyrannosauridae	Tyrannosauridae Lateral	BMNH R7994 (formely AMNH 5866)	d08	rex	Hendrickx et al., 2015	Lance Formation	Weston County	Wyoming	U.S.	Maastrichtian	Late Cretaceous	Adult; Stage 4	Left	d08	Lateral	38.54	29.2	61.14	71.14	0.757654	1.5864	29.6	21.39	0.722635	17.77	53.37	75.0211	?	present, tenuous	?	absent	absent	?	?	?	?	?	?		9			7
812	Tyrannosaurus	Tyrannosaurus lateral	Tyrannosauridae	Tyrannosauridae Lateral	BMNH R7994 (formely AMNH 5866)	d09	rex	Hendrickx et al., 2015	Lance Formation	Weston County	Wyoming	U.S.	Maastrichtian	Late Cretaceous	Adult; Stage 4	Left	d09	Lateral	32.28	26.79	56.51	60.11	0.829926	1.75062	26	19.82	0.762308	15.61	44.5	74.0309	?	present, tenuous	?	absent	absent	?	?	?	?	?	?		7.5			?
813	Tyrannosaurus	Tyrannosaurus lateral	Tyrannosauridae	Tyrannosauridae Lateral	BMNH R7994 (formely AMNH 5866)	d11	rex	Hendrickx et al., 2015	Lance Formation	Weston County	Wyoming	U.S.	Maastrichtian	Late Cretaceous	Adult; Stage 4	Left	d11	Lateral	23.88	17.22	31.45	38.74	0.721106	1.317	18.67	11.88	0.636315	?	?	?	3/3mm	present, numerous	?	absent	absent	?	?	?	?	?	?		10			10.5
814	Tyrannosaurus	Tyrannosaurus lateral	Tyrannosauridae	Tyrannosauridae Lateral	BMNH R7994 (formely AMNH 5866)	d12	rex	Hendrickx et al., 2015	Lance Formation	Weston County	Wyoming	U.S.	Maastrichtian	Late Cretaceous	Adult; Stage 4	Left	d12	Lateral	17.83	12.06	16.35	24.51	0.676388	0.916994	12.98	8.84	0.681048	?	?	?	0	absent on lingual side	?	absent	absent	?	?	?	?	?	?		11			11
815	Tyrannosaurus	Tyrannosaurus lateral	Tyrannosauridae	Tyrannosauridae Lateral	BMNH R7994 (formely AMNH 5866)	d07	rex	Smith, 2005	Lance Formation	Weston County	Wyoming	U.S.	Maastrichtian	Late Cretaceous	Adult; Stage 4	Left	d07	Lateral	40.46	28.55	76.12	86.28	0.705635	1.88136	?	?	?	?	?	?	?	?	?	?	?	?	?	?	?	86.93	-0.1	9	6.8	15	9	7.7	10	10.3	8.9
816	Tyrannosaurus	Tyrannosaurus lateral	Tyrannosauridae	Tyrannosauridae Lateral	BMNH R7994 (formely AMNH 5866)	d08	rex	Smith, 2005	Lance Formation	Weston County	Wyoming	U.S.	Maastrichtian	Late Cretaceous	Adult; Stage 4	Left	d08	Lateral	38.87	33.12	65.23	79.88	0.852071	1.67816	?	?	?	?	?	?	?	?	?	?	?	?	?	?	?	86.35	-0.1	8.5	7	12.3	8.5	7.5	11	9.3	9
817	Tyrannosaurus	Tyrannosaurus lateral	Tyrannosauridae	Tyrannosauridae Lateral	BMNH R7994 (formely AMNH 5866)	d09	rex	Smith, 2005	Lance Formation	Weston County	Wyoming	U.S.	Maastrichtian	Late Cretaceous	Adult; Stage 4	Left	d09	Lateral	32.59	26.99	56.6	62.74	0.828168	1.73673	?	?	?	?	?	?	?	?	?	?	?	?	?	?	?	85.99	-0.05	8.5	8.3	12.5	9	8	11.5	9.8	9.5
818	Tyrannosaurus	Tyrannosaurus lateral	Tyrannosauridae	Tyrannosauridae Lateral	BMNH R7994 (formely AMNH 5866)	d11	rex	Smith, 2005	Lance Formation	Weston County	Wyoming	U.S.	Maastrichtian	Late Cretaceous	Adult; Stage 4	Left	d11	Lateral	30.49	22.12	45.63	52.6	0.725484	1.49656	?	?	?	?	?	?	?	?	?	?	?	?	?	?	?	85.05	-0.07	9	10.3	12.5	9.5	9	12	10.6	10.2
819	Tyrannosaurus	Tyrannosaurus lateral	Tyrannosauridae	Tyrannosauridae Lateral	BMNH R7994 (formely AMNH 5866)	d12	rex	Smith, 2005	Lance Formation	Weston County	Wyoming	U.S.	Maastrichtian	Late Cretaceous	Adult; Stage 4	Left	d12	Lateral	23.98	16.12	32.38	37.07	0.672227	1.35029	?	?	?	?	?	?	?	?	?	?	?	?	?	?	?	83.16	-0.05	9	12	13.5	9.5	10.5	12.5	11.5	10.8
820	Tyrannosaurus	Tyrannosaurus lateral	Tyrannosauridae	Tyrannosauridae Lateral	BMNH R7994 (formely AMNH 5866)	d13	rex	Smith, 2005	Lance Formation	Weston County	Wyoming	U.S.	Maastrichtian	Late Cretaceous	Adult; Stage 4	Left	d13	Lateral	18.37	10.35	22.51	26.85	0.563419	1.22537	?	?	?	?	?	?	?	?	?	?	?	?	?	?	?	80.21	-0.02	10	10.5	13	12	14	16	11.2	14
821	Tyrannosaurus	Tyrannosaurus lateral	Tyrannosauridae	Tyrannosauridae Lateral	LACM 150167	mx06	rex	Smith, 2005	Hell Creek Formation	Carter County	Montana	U.S.	Maastrichtian	Late Cretaceous	Adult	Left	mx06	Lateral	42.1	25.8	88.82	92.44	0.612827	2.10974	?	?	?	?	?	?	?	?	?	?	?	?	?	?	?	87.51	-0.07	9	8	8.5	8.5	8.5	12	8.5	9.7
822	Tyrannosaurus	Tyrannosaurus lateral	Tyrannosauridae	Tyrannosauridae Lateral	LACM 150167	d03	rex	Smith, 2005	Hell Creek Formation	Carter County	Montana	U.S.	Maastrichtian	Late Cretaceous	Adult	Right	d03	Lateral	38.1	23.9	73.35	86.7	0.627297	1.9252	?	?	?	?	?	?	?	?	?	?	?	?	?	?	?	86.7	-0.07	9.5	8	12	9.5	10	12	9.8	10.5
823	Tyrannosaurus	Tyrannosaurus lateral	Tyrannosauridae	Tyrannosauridae Lateral	LACM 150167	d04	rex	Smith, 2005	Hell Creek Formation	Carter County	Montana	U.S.	Maastrichtian	Late Cretaceous	Adult	Right	d04	Lateral	42.1	28.9	76.02	87.89	0.686461	1.8057	?	?	?	?	?	?	?	?	?	?	?	?	?	?	?	86.91	-0.08	7.5	8	9.5	10	8.5	14	8.3	10.8
824	Tyrannosaurus	Tyrannosaurus lateral	Tyrannosauridae	Tyrannosauridae Lateral	LACM 150167	d13	rex	Smith, 2005	Hell Creek Formation	Carter County	Montana	U.S.	Maastrichtian	Late Cretaceous	Adult	Right	d13	Lateral	16.2	11	17.75	19.9	0.679012	1.09568	?	?	?	?	?	?	?	?	?	?	?	?	?	?	?	77.86	-0.01	11	12	16	12	14	19.5	13	15.2
825	Tyrannosaurus	Tyrannosaurus mesial	Tyrannosauridae	Tyrannosauridae Mesial	LACM 23844	mx01	rex	Smith, 2005	Hell Creek Formation	Jordan, Dawson County	Montana	U.S.	Maastrichtian	Late Cretaceous	Adult	Right	mx01	Mesial	46	33.7	79.09	88.18	0.732609	1.71935	?	?	?	?	?	?	?	?	?	?	?	?	?	?	?	87.12	-0.11	/	?	?	?	?	?	?	?
826	Tyrannosaurus	Tyrannosaurus lateral	Tyrannosauridae	Tyrannosauridae Lateral	LACM 23844	mx03	rex	Smith, 2005	Hell Creek Formation	Jordan, Dawson County	Montana	U.S.	Maastrichtian	Late Cretaceous	Adult	Right	mx03	Lateral	54.5	34.4	117.1	138.9	0.631193	2.14862	?	?	?	?	?	?	?	?	?	?	?	?	?	?	?	87.87	-0.1	/	6.5	8.5	/	8	/	/	8.5
827	Tyrannosaurus	Tyrannosaurus lateral	Tyrannosauridae	Tyrannosauridae Lateral	LACM 23844	mx05	rex	Smith, 2005	Hell Creek Formation	Jordan, Dawson County	Montana	U.S.	Maastrichtian	Late Cretaceous	Adult	Right	mx05	Lateral	47.8	32.6	100.5	110.9	0.682008	2.10251	?	?	?	?	?	?	?	?	?	?	?	?	?	?	?	87.68	-0.06	9	6.5	10	9	10	12	8.5	10.3
828	Tyrannosaurus	Tyrannosaurus lateral	Tyrannosauridae	Tyrannosauridae Lateral	LACM 23844	d02	rex	Smith, 2005	Hell Creek Formation	Jordan, Dawson County	Montana	U.S.	Maastrichtian	Late Cretaceous	Adult	Comp/	d02	Lateral	38.8	27.4	68.93	77.65	0.706186	1.77655	?	?	?	?	?	?	?	?	?	?	?	?	?	?	?	86.5	-0.06	7	?	?	?	?	?	?	?
829	Tyrannosaurus	Tyrannosaurus lateral	Tyrannosauridae	Tyrannosauridae Lateral	LACM 23844	d04	rex	Smith, 2005	Hell Creek Formation	Jordan, Dawson County	Montana	U.S.	Maastrichtian	Late Cretaceous	Adult	Left	d04	Lateral	47.1	35.1	87.99	107.4	0.745223	1.86815	?	?	?	?	?	?	?	?	?	?	?	?	?	?	?	87.22	-0.05	/	?	?	?	?	?	?	?
830	Tyrannosaurus	Tyrannosaurus lateral	Tyrannosauridae	Tyrannosauridae Lateral	LACM 23844	d05	rex	Smith, 2005	Hell Creek Formation	Jordan, Dawson County	Montana	U.S.	Maastrichtian	Late Cretaceous	Adult	Right	d05	Lateral	47.6	33.9	96.94	102.2	0.712185	2.03655	?	?	?	?	?	?	?	?	?	?	?	?	?	?	?	87.7	-0.1	8	7.5	/	8.5	7	10	7.8	8.5
831	Tyrannosaurus	Tyrannosaurus lateral	Tyrannosauridae	Tyrannosauridae Lateral	LACM 23844	d07	rex	Smith, 2005	Hell Creek Formation	Jordan, Dawson County	Montana	U.S.	Maastrichtian	Late Cretaceous	Adult	Comp/	d07	Lateral	37.2	27.1	60.98	71.93	0.728495	1.63925	?	?	?	?	?	?	?	?	?	?	?	?	?	?	?	86.05	-0.12	8	8.5	10	9	8	11	8.8	9.3
832	Tyrannosaurus	Tyrannosaurus lateral	Tyrannosauridae	Tyrannosauridae Lateral	LACM 23844	d08	rex	Smith, 2005	Hell Creek Formation	Jordan, Dawson County	Montana	U.S.	Maastrichtian	Late Cretaceous	Adult	Left	d08	Lateral	41.2	28.5	85.3	96.94	0.691748	2.07039	?	?	?	?	?	?	?	?	?	?	?	?	?	?	?	87.2	-0.04	/	?	?	?	?	?	?	?
833	Tyrannosaurus	Tyrannosaurus lateral	Tyrannosauridae	Tyrannosauridae Lateral	LACM 23844	d11	rex	Smith, 2005	Hell Creek Formation	Jordan, Dawson County	Montana	U.S.	Maastrichtian	Late Cretaceous	Adult	Left	d11	Lateral	20	15.9	21.78	27.29	0.795	1.089	?	?	?	?	?	?	?	?	?	?	?	?	?	?	?	80.06	0	/	?	?	?	?	?	?	?
834	Tyrannosaurus	Tyrannosaurus lateral	Tyrannosauridae	Tyrannosauridae Lateral	UCMP 118742	mx07	rex	Smith, 2005	Hell Creek Formation	Garfield County	Montana	U.S.	Maastrichtian	Late Cretaceous	Adult	Right	mx07	Lateral	45.4	35	83.09	94.84	0.770925	1.83018	?	?	?	?	?	?	?	?	?	?	?	?	?	?	?	87.19	-0.08	/	?	/	9	10	13	8	9
835	Tyrannosaurus	Tyrannosaurus lateral	Tyrannosauridae	Tyrannosauridae Lateral	UCMP 118742	mx08	rex	Smith, 2005	Hell Creek Formation	Garfield County	Montana	U.S.	Maastrichtian	Late Cretaceous	Adult	Right	mx08	Lateral	42	30.5	71.36	78.29	0.72619	1.69905	?	?	?	?	?	?	?	?	?	?	?	?	?	?	?	86.85	-0.09	/	?	/	9	9	16	8	9
836	Tyrannosaurus	Tyrannosaurus lateral	Tyrannosauridae	Tyrannosauridae Lateral	UCMP 118742	mx09	rex	Smith, 2005	Hell Creek Formation	Garfield County	Montana	U.S.	Maastrichtian	Late Cretaceous	Adult	Right	mx09	Lateral	41.3	33.5	72.95	88.32	0.811138	1.76634	?	?	?	?	?	?	?	?	?	?	?	?	?	?	?	86.71	-0.06	/	?	/	9	10	17	8	9
837	Tyrannosaurus	Tyrannosaurus lateral	Tyrannosauridae	Tyrannosauridae Lateral	UCMP 118742	mx11	rex	Smith, 2005	Hell Creek Formation	Garfield County	Montana	U.S.	Maastrichtian	Late Cretaceous	Adult	Right	mx11	Lateral	28.8	19	48.26	54.52	0.659722	1.67569	?	?	?	?	?	?	?	?	?	?	?	?	?	?	?	85.27	-0.01	/	?	/	10	13	16	8	11
838	Tyrannosaurus	Tyrannosaurus lateral	Tyrannosauridae	Tyrannosauridae Lateral	UCMP 118742	mx12	rex	Smith, 2005	Hell Creek Formation	Garfield County	Montana	U.S.	Maastrichtian	Late Cretaceous	Adult	Right	mx12	Lateral	19.1	14	27.02	34.25	0.732984	1.41466	?	?	?	?	?	?	?	?	?	?	?	?	?	?	?	81.45	0.05	/	?	/	11	14	17	11	12
839	Zhuchengtyrannus	Zhuchengtyrannus	Tyrannosauridae	Tyrannosauridae Mesial	ZCDM V0031/IVPP FV 1794	dt2	magnus	Young et al., 2019 (C.H. pers. measurements)	Wangshi Group, near the transition between the Xingezhuang Formation and the Hongtuya Formation	Zangjiazhuang, Zhucheng City	Shandong Province	China	Campanian	Late Cretaceous	Adult	Left	dt2	Mesial	35.08	26.54	69.27	63.05	0.756556	1.97463	23.88	20.3	0.850084	15.82	47.23	74.9088	?	?	?	absent	absent	?	?	?	?	?	?	?	?	?	6.875	6.5	8.5	?	7.29
840	Zhuchengtyrannus	Zhuchengtyrannus	Tyrannosauridae	Tyrannosauridae Mesial	ZCDM V0031/IVPP FV 1794	dt3	magnus	Young et al., 2019 (C.H. pers. measurements)	Wangshi Group, near the transition between the Xingezhuang Formation and the Hongtuya Formation	Zangjiazhuang, Zhucheng City	Shandong Province	China	Campanian	Late Cretaceous	Adult	Left	dt3	Mesial	35.53	24.06	70.56	67.06	0.677174	1.98593	27.94	20.02	0.716535	14.31	52.75	78.6609	?	?	?	absent	absent	?	?	?	?	?	?	7	6.5	7	8	7	6.66	6.83	7.22
841	Zhuchengtyrannus	Zhuchengtyrannus	Tyrannosauridae	Tyrannosauridae Lateral	ZCDM V0031/IVPP FV 1794	dt4	magnus	Young et al., 2019 (C.H. pers. measurements)	Wangshi Group, near the transition between the Xingezhuang Formation and the Hongtuya Formation	Zangjiazhuang, Zhucheng City	Shandong Province	China	Campanian	Late Cretaceous	Adult	Left	dt4	Lateral	33.24	25.85	60.65	67.79	0.777677	1.82461	27.41	18.64	0.680044	14.2	53.59	79.053	?	?	?	absent	absent	?	?	?	?	?	?	6.875	7	6.875	7.5	7	7.25	6.92	7.25
842	Zhuchengtyrannus	Zhuchengtyrannus	Tyrannosauridae	Tyrannosauridae Lateral	ZCDM V0031/IVPP FV 1794	dt5	magnus	Young et al., 2019 (C.H. pers. measurements)	Wangshi Group, near the transition between the Xingezhuang Formation and the Hongtuya Formation	Zangjiazhuang, Zhucheng City	Shandong Province	China	Campanian	Late Cretaceous	Adult	Left	dt5	Lateral	35.36	25.68	66.21	65.79	0.726244	1.87245	28.12	16.74	0.595306	20.59	45.2	68.7035	2	subtle on the labial side (no access to lingual side)	?	absent	absent	?	?	?	?	?	?	6.25	6.5	7.25	8.75	7	8	6.66	7.91
843	Zhuchengtyrannus	Zhuchengtyrannus	Tyrannosauridae	Tyrannosauridae Lateral	ZCDM V0031/IVPP FV 1794	dt6	magnus	Young et al., 2019 (C.H. pers. measurements)	Wangshi Group, near the transition between the Xingezhuang Formation and the Hongtuya Formation	Zangjiazhuang, Zhucheng City	Shandong Province	China	Campanian	Late Cretaceous	Adult	Left	dt6	Lateral	34.7	27.28	69.49	?	0.786167	2.00259	29.73	19.15	0.644131	?	?	?	?	?	?	absent	absent	?	?	?	?	?	?	8.5	7.5	?	8.125	7.25	9	8	8.125
844	Zhuchengtyrannus	Zhuchengtyrannus	Tyrannosauridae	Tyrannosauridae Lateral	ZCDM V0031/IVPP FV 1794	dt7	magnus	Young et al., 2019 (C.H. pers. measurements)	Wangshi Group, near the transition between the Xingezhuang Formation and the Hongtuya Formation	Zangjiazhuang, Zhucheng City	Shandong Province	China	Campanian	Late Cretaceous	Adult	Left	dt7	Lateral	35.23	23.56	62.54	68.95	0.668748	1.77519	28.35	17.43	0.614815	?	?	?	2	subtle on the labial side (no access to lingual side)	?	absent	absent	?	?	?	?	?	?	6.875	7.25	?	8	7.75	8.75	7.06	8.16
845	Tyrannosauridae	Tyrannosauridae lateral	Tyrannosauridae	Tyrannosauridae Lateral	BMNH R3683	Isolated	indet.	Young et al., 2019 (C.H. pers. measurements)	Laramie Formation	Schneider Creek, Converse Co.	Wyoming	U.S.	Maastrichtian	Late Cretaceous	/	/	Isolated	Lateral	17.82	13.16	47.12	49.54	0.738496	2.64422	15.58	9.92	0.636714	0	49.54	100	2/5	well visible with light on labial, tenuous on distolingual	short to medium on DB, well-developped on DC, both on labial and lingual sides	absent	absent	4.31	4.16	4.73	4.15	?	?	10	8.5	14.5	?	9.5	14	11	11.75
846	Compsognathus	Compsognathus mesial	Compsognathidae	Compsognathidae	MNHN CNJ 79	Isolated pmx1?	longipes	Young et al., 2019 (C.H. pers. measurements)	Lithographic Portlandian Limestone of the “Petit Plan”	Canjuers	Département du Var	France	Lower Tithonian	Late Jurassic	Immature?	Left	Isolated pmx1?	Mesial	0.68	?	0.87	0.92	?	1.27941	?	?	?	/	/	/	/	absent	absent	absent	absent	?	?	?	?	?	?	/	/	/	/	/	/	/	/
847	Compsognathus	Compsognathus mesial	Compsognathidae	Compsognathidae	MNHN CNJ 79	Isolated pmx2?	longipes	Young et al., 2019 (C.H. pers. measurements)	Lithographic Portlandian Limestone of the “Petit Plan”	Canjuers	Département du Var	France	Lower Tithonian	Late Jurassic	Immature?	Left	Isolated pmx2?	Mesial	0.38	?	0.57	0.55	?	1.5	?	?	?	/	/	/	/	absent	absent	absent	absent	?	?	?	?	?	?	/	/	/	/	/	/	/	/
848	Compsognathus	Compsognathus mesial	Compsognathidae	Compsognathidae	MNHN CNJ 79	Isolated pmx3?	longipes	Young et al., 2019 (C.H. pers. measurements)	Lithographic Portlandian Limestone of the “Petit Plan”	Canjuers	Département du Var	France	Lower Tithonian	Late Jurassic	Immature?	Left	Isolated pmx3?	Mesial	1.09	?	1.45	2.15	?	1.33028	?	?	?	/	/	/	/	absent	absent	absent	absent	?	?	?	?	?	?	/	/	/	/	/	/	/	/
849	Compsognathus	Compsognathus mesial	Compsognathidae	Compsognathidae	MNHN CNJ 79	Isolated pmx4?	longipes	Young et al., 2019 (C.H. pers. measurements)	Lithographic Portlandian Limestone of the “Petit Plan”	Canjuers	Département du Var	France	Lower Tithonian	Late Jurassic	Immature?	Left	Isolated pmx4?	Mesial	0.61	?	0.9	0.96	?	1.47541	?	?	?	/	/	/	/	absent	absent	absent	absent	?	?	?	?	?	?	/	/	/	/	/	/	/	/
850	Compsognathus	Compsognathus mesial	Compsognathidae	Compsognathidae	MNHN CNJ 79	Isolated pmx1?	longipes	Young et al., 2019 (C.H. pers. measurements)	Lithographic Portlandian Limestone of the “Petit Plan”	Canjuers	Département du Var	France	Lower Tithonian	Late Jurassic	Immature?	Right	Isolated pmx1?	Mesial	0.53	?	0.8	0.9	?	1.50943	?	?	?	/	/	/	/	absent	absent	absent	absent	?	?	?	?	?	?	/	/	/	/	/	/	/	/
851	Compsognathus	Compsognathus mesial	Compsognathidae	Compsognathidae	MNHN CNJ 79	Isolated pmx2?	longipes	Young et al., 2019 (C.H. pers. measurements)	Lithographic Portlandian Limestone of the “Petit Plan”	Canjuers	Département du Var	France	Lower Tithonian	Late Jurassic	Immature?	Right	Isolated pmx2?	Mesial	0.46	?	0.78	0.81	?	1.69565	?	?	?	/	/	/	/	absent	absent	absent	absent	?	?	?	?	?	?	/	/	/	/	/	/	/	/
852	Compsognathus	Compsognathus lateral	Compsognathidae	Compsognathidae	MNHN CNJ 79	Isolated mx1?	longipes	Young et al., 2019 (C.H. pers. measurements)	Lithographic Portlandian Limestone of the “Petit Plan”	Canjuers	Département du Var	France	Lower Tithonian	Late Jurassic	Immature?	Right	Isolated mx1?	Lateral	1.12	?	1.86	2.15	?	1.66071	?	?	?	/	/	/	/	absent	absent	absent	absent	?	?	?	?	?	?	/	/	/	/	/	/	/	/
853	Compsognathus	Compsognathus lateral	Compsognathidae	Compsognathidae	MNHN CNJ 79	Isolated mx2?	longipes	Young et al., 2019 (C.H. pers. measurements)	Lithographic Portlandian Limestone of the “Petit Plan”	Canjuers	Département du Var	France	Lower Tithonian	Late Jurassic	Immature?	Right	Isolated mx2?	Lateral	1.24	?	1.52	2.27	?	1.22581	?	?	?	/	/	/	/	absent	absent	absent	absent	?	?	?	?	?	?	/	/	/	/	/	/	/	/
854	Compsognathus	Compsognathus mesial	Compsognathidae	Compsognathidae	MNHN CNJ 79	pmx1	longipes	Young et al., 2019 (C.H. pers. measurements)	Lithographic Portlandian Limestone of the “Petit Plan”	Canjuers	Département du Var	France	Lower Tithonian	Late Jurassic	Immature?	Right	pmx1	Mesial	0.82	?	1.43	1.57	?	1.7439	?	?	?	/	/	/	/	absent	absent	absent	absent	?	?	?	?	?	?	/	/	/	/	/	/	/	/
855	Compsognathus	Compsognathus lateral	Compsognathidae	Compsognathidae	MNHN CNJ 79	mx3?	longipes	Young et al., 2019 (C.H. pers. measurements)	Lithographic Portlandian Limestone of the “Petit Plan”	Canjuers	Département du Var	France	Lower Tithonian	Late Jurassic	Immature?	Right	mx3?	Lateral	1.37	?	2.25	2.9	?	1.64234	?	?	?	/	/	/	/	absent	absent	absent	absent	?	?	?	?	?	?	/	/	/	/	/	/	/	/
856	Compsognathus	Compsognathus lateral	Compsognathidae	Compsognathidae	MNHN CNJ 79	mx4?	longipes	Young et al., 2019 (C.H. pers. measurements)	Lithographic Portlandian Limestone of the “Petit Plan”	Canjuers	Département du Var	France	Lower Tithonian	Late Jurassic	Immature?	Right	mx4?	Lateral	1.52	?	2.37	2.9	?	1.55921	?	?	?	/	/	/	/	absent	absent	absent	absent	?	?	?	?	?	?	/	/	/	/	/	/	/	/
857	Compsognathus	Compsognathus lateral	Compsognathidae	Compsognathidae	MNHN CNJ 79	mx last1	longipes	Young et al., 2019 (C.H. pers. measurements)	Lithographic Portlandian Limestone of the “Petit Plan”	Canjuers	Département du Var	France	Lower Tithonian	Late Jurassic	Immature?	Right	mx last1	Lateral	1.1	?	1.43	1.89	?	1.3	?	?	?	/	/	/	/	absent	absent	absent	absent	?	?	?	?	?	?	/	/	/	/	/	/	/	/
858	Compsognathus	Compsognathus lateral	Compsognathidae	Compsognathidae	MNHN CNJ 79	mx last3	longipes	Young et al., 2019 (C.H. pers. measurements)	Lithographic Portlandian Limestone of the “Petit Plan”	Canjuers	Département du Var	France	Lower Tithonian	Late Jurassic	Immature?	Right	mx last3	Lateral	1.21	?	1.47	2.16	?	1.21488	?	?	?	/	/	/	/	absent	absent	absent	absent	?	?	?	?	?	?	/	/	/	/	/	/	/	/
859	Compsognathus	Compsognathus lateral	Compsognathidae	Compsognathidae	MNHN CNJ 79	mx last4	longipes	Young et al., 2019 (C.H. pers. measurements)	Lithographic Portlandian Limestone of the “Petit Plan”	Canjuers	Département du Var	France	Lower Tithonian	Late Jurassic	Immature?	Right	mx last4	Lateral	0.68	?	0.8	1.03	?	1.17647	?	?	?	/	/	/	/	absent	absent	absent	absent	?	?	?	?	?	?	/	/	/	/	/	/	/	/
860	Compsognathus	Compsognathus lateral	Compsognathidae	Compsognathidae	MNHN CNJ 79	isolated mx1?	longipes	Young et al., 2019 (C.H. pers. measurements)	Lithographic Portlandian Limestone of the “Petit Plan”	Canjuers	Département du Var	France	Lower Tithonian	Late Jurassic	Immature?	Left	isolated mx1?	Lateral	1.26	?	1.7	2.27	?	1.34921	?	?	?	/	/	/	/	absent	absent	absent	absent	?	?	?	?	?	?	/	/	/	/	/	/	/	/
861	Compsognathus	Compsognathus lateral	Compsognathidae	Compsognathidae	MNHN CNJ 79	mx2?	longipes	Young et al., 2019 (C.H. pers. measurements)	Lithographic Portlandian Limestone of the “Petit Plan”	Canjuers	Département du Var	France	Lower Tithonian	Late Jurassic	Immature?	Left	mx2?	Lateral	1.41	?	2.12	2.69	?	1.50355	?	?	?	/	/	/	/	absent	absent	absent	absent	?	?	?	?	?	?	/	/	/	/	/	/	/	/
862	Compsognathus	Compsognathus lateral	Compsognathidae	Compsognathidae	MNHN CNJ 79	mx3?	longipes	Young et al., 2019 (C.H. pers. measurements)	Lithographic Portlandian Limestone of the “Petit Plan”	Canjuers	Département du Var	France	Lower Tithonian	Late Jurassic	Immature?	Left	mx3?	Lateral	1.72	?	2.75	3.47	?	1.59884	?	?	?	/	/	/	/	absent	absent	absent	absent	?	?	?	?	?	?	/	/	/	/	67	/	/	67
863	Compsognathus	Compsognathus lateral	Compsognathidae	Compsognathidae	MNHN CNJ 79	mx4?	longipes	Young et al., 2019 (C.H. pers. measurements)	Lithographic Portlandian Limestone of the “Petit Plan”	Canjuers	Département du Var	France	Lower Tithonian	Late Jurassic	Immature?	Left	mx4?	Lateral	1.88	?	2.6	3.67	?	1.38298	?	?	?	/	/	/	/	absent	absent	absent	absent	?	?	?	?	?	?	/	/	/	68	60	/	/	64
864	Compsognathus	Compsognathus lateral	Compsognathidae	Compsognathidae	MNHN CNJ 79	mx5?	longipes	Young et al., 2019 (C.H. pers. measurements)	Lithographic Portlandian Limestone of the “Petit Plan”	Canjuers	Département du Var	France	Lower Tithonian	Late Jurassic	Immature?	Left	mx5?	Lateral	1.81	?	2.72	3.28	?	1.50276	?	?	?	/	/	/	/	absent	absent	absent	absent	?	?	?	?	?	?	/	/	/	71	66	/	/	68.5
865	Compsognathus	Compsognathus lateral	Compsognathidae	Compsognathidae	MNHN CNJ 79	mx6?	longipes	Young et al., 2019 (C.H. pers. measurements)	Lithographic Portlandian Limestone of the “Petit Plan”	Canjuers	Département du Var	France	Lower Tithonian	Late Jurassic	Immature?	Left	mx6?	Lateral	1.12	?	1.41	1.73	?	1.25893	?	?	?	/	/	/	/	absent	absent	absent	absent	?	?	?	?	?	?	/	/	/	/	/	/	/	/
866	Compsognathus	Compsognathus lateral	Compsognathidae	Compsognathidae	MNHN CNJ 79	mx11?	longipes	Young et al., 2019 (C.H. pers. measurements)	Lithographic Portlandian Limestone of the “Petit Plan”	Canjuers	Département du Var	France	Lower Tithonian	Late Jurassic	Immature?	Left	mx11?	Lateral	1.49	?	1.62	2.3	?	1.08725	?	?	?	/	/	/	/	absent	absent	absent	absent	?	?	?	?	?	?	/	/	/	/	/	80	/	80
867	Compsognathus	Compsognathus lateral	Compsognathidae	Compsognathidae	MNHN CNJ 79	mx12?	longipes	Young et al., 2019 (C.H. pers. measurements)	Lithographic Portlandian Limestone of the “Petit Plan”	Canjuers	Département du Var	France	Lower Tithonian	Late Jurassic	Immature?	Left	mx12?	Lateral	1.37	?	2.05	2.13	?	1.49635	?	?	?	/	/	/	/	absent	absent	absent	absent	?	?	?	?	?	?	/	/	/	/	/	/	/	/
868	Compsognathus	Compsognathus lateral	Compsognathidae	Compsognathidae	MNHN CNJ 79	mx last	longipes	Young et al., 2019 (C.H. pers. measurements)	Lithographic Portlandian Limestone of the “Petit Plan”	Canjuers	Département du Var	France	Lower Tithonian	Late Jurassic	Immature?	Left	mx last	Lateral	1.16	?	1.95	2.41	?	1.68103	?	?	?	/	/	/	/	absent	absent	absent	absent	?	?	?	?	?	?	/	/	/	/	56	/	/	56
869	Compsognathus	Compsognathus lateral	Compsognathidae	Compsognathidae	MNHN CNJ 79	dt4?	longipes	Young et al., 2019 (C.H. pers. measurements)	Lithographic Portlandian Limestone of the “Petit Plan”	Canjuers	Département du Var	France	Lower Tithonian	Late Jurassic	Immature?	Left	dt4?	Lateral	1.19	?	1.93	2.48	?	1.62185	?	?	?	/	/	/	/	absent	absent	absent	absent	?	?	?	?	?	?	/	/	/	/	/	/	/	/
870	Compsognathus	Compsognathus lateral	Compsognathidae	Compsognathidae	MNHN CNJ 79	dt5?	longipes	Young et al., 2019 (C.H. pers. measurements)	Lithographic Portlandian Limestone of the “Petit Plan”	Canjuers	Département du Var	France	Lower Tithonian	Late Jurassic	Immature?	Left	dt5?	Lateral	1.25	?	1.26	1.88	?	1.008	?	?	?	/	/	/	/	absent	absent	absent	absent	?	?	?	?	?	?	/	/	/	/	/	/	/	/
871	Compsognathus	Compsognathus lateral	Compsognathidae	Compsognathidae	MNHN CNJ 79	dt6?	longipes	Young et al., 2019 (C.H. pers. measurements)	Lithographic Portlandian Limestone of the “Petit Plan”	Canjuers	Département du Var	France	Lower Tithonian	Late Jurassic	Immature?	Left	dt6?	Lateral	1.28	?	1.93	2.46	?	1.50781	?	?	?	/	/	/	/	absent	absent	absent	absent	?	?	?	?	?	?	/	/	/	/	/	/	/	/
872	Compsognathus	Compsognathus lateral	Compsognathidae	Compsognathidae	MNHN CNJ 79	dt7?	longipes	Young et al., 2019 (C.H. pers. measurements)	Lithographic Portlandian Limestone of the “Petit Plan”	Canjuers	Département du Var	France	Lower Tithonian	Late Jurassic	Immature?	Left	dt7?	Lateral	1.53	?	1.3	2.34	?	0.849673	?	?	?	/	/	/	/	absent	absent	absent	absent	?	?	?	?	?	?	/	/	/	/	/	/	/	/
873	Compsognathus	Compsognathus lateral	Compsognathidae	Compsognathidae	MNHN CNJ 79	dt8?	longipes	Young et al., 2019 (C.H. pers. measurements)	Lithographic Portlandian Limestone of the “Petit Plan”	Canjuers	Département du Var	France	Lower Tithonian	Late Jurassic	Immature?	Left	dt8?	Lateral	1.48	?	1.69	2.3	?	1.14189	?	?	?	/	/	/	/	absent	absent	absent	absent	?	?	?	?	?	?	/	/	/	/	/	/	/	/
874	Compsognathus	Compsognathus lateral	Compsognathidae	Compsognathidae	MNHN CNJ 79	dt9?	longipes	Young et al., 2019 (C.H. pers. measurements)	Lithographic Portlandian Limestone of the “Petit Plan”	Canjuers	Département du Var	France	Lower Tithonian	Late Jurassic	Immature?	Left	dt9?	Lateral	1.47	?	1.83	2.37	?	1.2449	?	?	?	/	/	/	/	absent	absent	absent	absent	?	?	?	?	?	?	/	/	/	/	/	/	/	/
875	Compsognathus	Compsognathus lateral	Compsognathidae	Compsognathidae	MNHN CNJ 79	dt10?	longipes	Young et al., 2019 (C.H. pers. measurements)	Lithographic Portlandian Limestone of the “Petit Plan”	Canjuers	Département du Var	France	Lower Tithonian	Late Jurassic	Immature?	Left	dt10?	Lateral	1.49	?	1.99	2.77	?	1.33557	?	?	?	/	/	/	/	absent	absent	absent	absent	?	?	?	?	?	?	/	/	/	/	/	/	/	/
876	Compsognathus	Compsognathus lateral	Compsognathidae	Compsognathidae	MNHN CNJ 79	dt11?	longipes	Young et al., 2019 (C.H. pers. measurements)	Lithographic Portlandian Limestone of the “Petit Plan”	Canjuers	Département du Var	France	Lower Tithonian	Late Jurassic	Immature?	Left	dt11?	Lateral	1.37	?	2.04	2.73	?	1.48905	?	?	?	/	/	/	/	absent	absent	absent	absent	?	?	?	?	?	?	/	/	/	/	/	/	/	/
877	Compsognathus	Compsognathus lateral	Compsognathidae	Compsognathidae	MNHN CNJ 79	dt12?	longipes	Young et al., 2019 (C.H. pers. measurements)	Lithographic Portlandian Limestone of the “Petit Plan”	Canjuers	Département du Var	France	Lower Tithonian	Late Jurassic	Immature?	Left	dt12?	Lateral	1.39	?	1.63	2.35	?	1.17266	?	?	?	/	/	/	/	absent	absent	absent	absent	?	?	?	?	?	?	/	/	/	/	/	/	/	/
878	Compsognathus	Compsognathus lateral	Compsognathidae	Compsognathidae	MNHN CNJ 79	dt13?	longipes	Young et al., 2019 (C.H. pers. measurements)	Lithographic Portlandian Limestone of the “Petit Plan”	Canjuers	Département du Var	France	Lower Tithonian	Late Jurassic	Immature?	Left	dt13?	Lateral	1.79	?	2.3	3.36	?	1.28492	?	?	?	/	/	/	?	absent	absent	absent	absent	?	?	?	?	?	?	?	?	?	?	?	?	?	?
879	Juravenator	Juravenator	Compsognathidae	Compsognathidae	JME Sch 200	pmx2	starki	Young et al., 2019 (C.H. pers. measurements) (measurements taken with ImageJ)	Silicified, laminated limestone	Schamhaupten, Eichstätt	Bavaria	Germany	Late Kimmeridgian	Late Jurassic	Juvenile/immature	Right	pmx2	Mesial	0.96	?	2.58	2.83	?	2.6875	?	?	?	/	/	/	?	?	?	absent	?	?	?	?	?	?	?	/	/	/	/	/	/	/	/
880	Juravenator	Juravenator	Compsognathidae	Compsognathidae	JME Sch 200	pmx3	starki	Young et al., 2019 (C.H. pers. measurements) (measurements taken with ImageJ)	Silicified, laminated limestone	Schamhaupten, Eichstätt	Bavaria	Germany	Late Kimmeridgian	Late Jurassic	Juvenile/immature	Right	pmx3	Mesial	1.61	?	2.97	3.78	?	1.84472	?	?	?	/	/	/	?	?	?	absent	?	?	?	?	?	?	?	/	/	/	69.44	52.63	54.68	/	58.91
881	Juravenator	Juravenator	Compsognathidae	Compsognathidae	JME Sch 200	mx1	starki	Young et al., 2019 (C.H. pers. measurements) (measurements taken with ImageJ)	Silicified, laminated limestone	Schamhaupten, Eichstätt	Bavaria	Germany	Late Kimmeridgian	Late Jurassic	Juvenile/immature	Right	mx1	Lateral	1	?	2.03	2.47	?	2.03	?	?	?	/	/	/	?	?	?	absent	?	?	?	?	?	?	?	/	/	/	/	41.66	/	/	41.66
882	Juravenator	Juravenator	Compsognathidae	Compsognathidae	JME Sch 200	mx2	starki	Young et al., 2019 (C.H. pers. measurements) (measurements taken with ImageJ)	Silicified, laminated limestone	Schamhaupten, Eichstätt	Bavaria	Germany	Late Kimmeridgian	Late Jurassic	Juvenile/immature	Right	mx2	Lateral	1.33	?	2.81	3.38	?	2.11278	?	?	?	/	/	/	?	?	?	absent	?	?	?	?	?	?	?	/	/	/	/	38.46	/	/	38.46
883	Juravenator	Juravenator	Compsognathidae	Compsognathidae	JME Sch 200	mx3	starki	Young et al., 2019 (C.H. pers. measurements) (measurements taken with ImageJ)	Silicified, laminated limestone	Schamhaupten, Eichstätt	Bavaria	Germany	Late Kimmeridgian	Late Jurassic	Juvenile/immature	Right	mx3	Lateral	2.36	?	4.2	5.43	?	1.77966	?	?	?	/	/	/	?	?	?	absent	?	?	?	?	?	?	?	/	/	/	36	34.6	36.76	/	35.78
884	Juravenator	Juravenator	Compsognathidae	Compsognathidae	JME Sch 200	mx4	starki	Young et al., 2019 (C.H. pers. measurements) (measurements taken with ImageJ)	Silicified, laminated limestone	Schamhaupten, Eichstätt	Bavaria	Germany	Late Kimmeridgian	Late Jurassic	Juvenile/immature	Right	mx4	Lateral	1.82	?	3.36	4.39	?	1.84615	?	?	?	/	/	/	?	?	?	absent	?	?	?	?	?	?	?	/	/	/	43.75	35.29	44.1	/	41.04
885	Juravenator	Juravenator	Compsognathidae	Compsognathidae	JME Sch 200	mx6	starki	Young et al., 2019 (C.H. pers. measurements) (measurements taken with ImageJ)	Silicified, laminated limestone	Schamhaupten, Eichstätt	Bavaria	Germany	Late Kimmeridgian	Late Jurassic	Juvenile/immature	Right	mx6	Lateral	1	?	1.95	2.46	?	1.95	?	?	?	/	/	/	?	?	?	absent	?	?	?	?	?	?	?	/	/	/	42.37	40.8	45.45	/	42.37
886	Sinosauropteryx	Sinosauropteryx	Compsognathidae	Compsognathidae	NIGP 127586	pmx2	prima	Currie & Chen, 2001	Yixian Formation	Sihetun-Jianshangou region, Beipiao, and Dawangzhangzi, Lingyuan	Liaoning Province	China	Barremian – Aptian	Early Cretaceous	Juvenile/immature	left	pmx2	Mesial	0.9	?	3.8	?	?	4.22222	?	?	?	?	?	?	?	?	?	?	?	?	?	?	?	?	?	/	/	/	/	/	/	/	/
887	Sinosauropteryx	Sinosauropteryx	Compsognathidae	Compsognathidae	NIGP 127587	mx2 & mx3	prima	Currie & Chen, 2001	Yixian Formation	Sihetun-Jianshangou region, Beipiao, and Dawangzhangzi, Lingyuan	Liaoning Province	China	Barremian – Aptian	Early Cretaceous	Young	?	mx2 & mx3	Lateral	1	?	2.5	?	?	2.5	?	?	?	?	?	?	?	?	?	?	?	?	?	?	?	?	?	/	/	/	/	60	/	/	60
888	Sinosauropteryx	Sinosauropteryx	Compsognathidae	Compsognathidae	NIGP 127587	distal mx	prima	Currie & Chen, 2001	Yixian Formation	Sihetun-Jianshangou region, Beipiao, and Dawangzhangzi, Lingyuan	Liaoning Province	China	Barremian – Aptian	Early Cretaceous	Young	?	distal mx	Lateral	0.6	?	1.1	?	?	1.83333	?	?	?	?	?	?	?	?	?	?	?	?	?	?	?	?	?	/	/	/	/	70	/	/	70
889	Sinosauropteryx	Sinosauropteryx	Compsognathidae	Compsognathidae	NIGP 127587	dt2	prima	Currie & Chen, 2001	Yixian Formation	Sihetun-Jianshangou region, Beipiao, and Dawangzhangzi, Lingyuan	Liaoning Province	China	Barremian – Aptian	Early Cretaceous	Young	?	dt2	Lateral	0.6	?	2	?	?	3.33333	?	?	?	?	?	?	?	?	?	?	?	?	?	?	?	?	?	/	/	/	/	/	/	/	/
890	Sinosauropteryx	Sinosauropteryx	Compsognathidae	Compsognathidae	NIGP 127586	distal dt	prima	Currie & Chen, 2001	Yixian Formation	Sihetun-Jianshangou region, Beipiao, and Dawangzhangzi, Lingyuan	Liaoning Province	China	Barremian – Aptian	Early Cretaceous	Juvenile/immature	?	distal dt	Lateral	0.9	?	1.8	?	?	2	?	?	?	?	?	?	?	?	?	?	?	?	?	?	?	?	?	/	/	/	/	50	/	/	50
891	Scipionyx	Scipionyx	Compsognathidae	Compsognathidae	SBA-SA 163760	pmx2	samniticus	Dal Sasso et al., 2011	Calcari selciferi e ittiolitiferi di Pietraroja Formation	La Cavere quarry, Pietraroja	Benevento Province	Italy	Lower Albian	'Middle Cretaceous'	Hatchling	Right	pmx2	Mesial	1.3	?	3	?	?	2.30769	?	?	?	?	?	?	?	?	?	?	?	?	?	?	?	?	?	?	/	?	?	/	?	/	/
892	Scipionyx	Scipionyx	Compsognathidae	Compsognathidae	SBA-SA 163760	mx4	samniticus	Dal Sasso et al., 2011	Calcari selciferi e ittiolitiferi di Pietraroja Formation	La Cavere quarry, Pietraroja	Benevento Province	Italy	Lower Albian	'Middle Cretaceous'	Hatchling	Right	mx4	Lateral	1.5	?	4	?	?	2.66667	?	?	?	?	?	?	?	?	?	?	?	?	?	?	?	?	?	?	/	?	?	60	?	/	55-60
893	Scipionyx	Scipionyx	Compsognathidae	Compsognathidae	SBA-SA 163760	d3	samniticus	Dal Sasso et al., 2011	Calcari selciferi e ittiolitiferi di Pietraroja Formation	La Cavere quarry, Pietraroja	Benevento Province	Italy	Lower Albian	'Middle Cretaceous'	Hatchling	Right	d3	Lateral	1.3	?	2.3	?	?	1.76923	?	?	?	?	?	?	?	?	?	?	?	?	?	?	?	?	?	?	/	?	?	65	?	/	65
894	Falcarius	Falcarius	Therizinosauria	Therizinosauria	UMNH VP 14545	mx4	utahensis	Young et al., 2019 (C.H. pers. measurements)	base of the Cedar Mountain Formation	Crystal Geyser Quarry, Grand County	Utah	USA	Barremian	Early Cretaceous	?	Left	mx4	Lateral	3.04	2.41	5.34	6.1	0.792763	1.75658	3.37	1.96	0.581602	?	?	?	?	?	?	absent	absent	?	?	?	?	?	?	?	?	/	?	50	/	?	50
895	Falcarius	Falcarius	Therizinosauria	Therizinosauria	UMNH VP 14545	mx5	utahensis	Young et al., 2019 (C.H. pers. measurements)	base of the Cedar Mountain Formation	Crystal Geyser Quarry, Grand County	Utah	USA	Barremian	Early Cretaceous	?	Left	mx5	Lateral	3.41	2.33	4.79	5.77	0.683284	1.40469	3.46	1.73	0.5	?	?	?	?	?	?	absent	absent	?	?	?	?	?	?	?	45	/	?	50	/	45	50
896	Falcarius	Falcarius	Therizinosauria	Therizinosauria	UMNH VP 14545	mx10	utahensis	Young et al., 2019 (C.H. pers. measurements)	base of the Cedar Mountain Formation	Crystal Geyser Quarry, Grand County	Utah	USA	Barremian	Early Cretaceous	?	Left	mx10	Lateral	2.9	1.91	4.25	4.54	0.658621	1.46552	3.28	1.66	0.506098	?	?	?	?	?	?	absent	absent	?	?	?	?	?	?	?	50	/	?	47.5	/	?	?
897	Falcarius	Falcarius	Therizinosauria	Therizinosauria	UMNH VP 14545	mx12	utahensis	Young et al., 2019 (C.H. pers. measurements)	base of the Cedar Mountain Formation	Crystal Geyser Quarry, Grand County	Utah	USA	Barremian	Early Cretaceous	?	Left	mx12	Lateral	2.31	1.65	3.74	4.52	0.714286	1.61905	2.55	1.55	0.607843	?	?	?	?	?	?	absent	absent	?	?	?	?	?	?	?	?	/	?	?	/	?	?
898	Falcarius	Falcarius	Therizinosauria	Therizinosauria	UMNH VP 14545	mx13	utahensis	Young et al., 2019 (C.H. pers. measurements)	base of the Cedar Mountain Formation	Crystal Geyser Quarry, Grand County	Utah	USA	Barremian	Early Cretaceous	?	Left	mx13	Lateral	2.33	1.77	4.31	4.48	0.759657	1.84979	2.62	1.74	0.664122	?	?	?	?	?	?	absent	absent	?	?	?	?	?	?	?	47.5	/	?	47.5	/	47.5	47.5
899	Falcarius	Falcarius	Therizinosauria	Therizinosauria	UMNH VP 14545	mx14	utahensis	Young et al., 2019 (C.H. pers. measurements)	base of the Cedar Mountain Formation	Crystal Geyser Quarry, Grand County	Utah	USA	Barremian	Early Cretaceous	?	Left	mx14	Lateral	2.3	1.74	3.53	3.96	0.756522	1.53478	2.51	1.46	0.581673	?	?	?	?	?	?	absent	absent	?	?	?	?	?	?	42.5	45	/	42.5	45	/	43.75	43.75
900	Falcarius	Falcarius	Therizinosauria	Therizinosauria	UMNH VP 14545	mx15	utahensis	Young et al., 2019 (C.H. pers. measurements)	base of the Cedar Mountain Formation	Crystal Geyser Quarry, Grand County	Utah	USA	Barremian	Early Cretaceous	?	Left	mx15	Lateral	2.27	1.68	4.21	3.79	0.740088	1.85463	2.6	1.39	0.534615	?	?	?	?	?	?	absent	absent	?	?	?	?	?	?	?	48	/	?	45	/	48	45
901	Falcarius	Falcarius	Therizinosauria	Therizinosauria	UMNH VP 14528	dt?	utahensis	Young et al., 2019 (C.H. pers. measurements)	base of the Cedar Mountain Formation	Crystal Geyser Quarry, Grand County	Utah	USA	Barremian	Early Cretaceous	?	Left	dt?	Lateral	3.51	1.9	3.96	4.61	0.541311	1.12821	2.77	1.77	0.638989	?	?	?	?	?	?	absent	absent	?	?	?	?	?	?	42.5	45	/	37.5	30	/	43.75	36.25
902	Eshanosaurus	Eshanosaurus	Therizinosauria	Therizinosauria	IVPP V11579	dt13 from start	deguchiianus	Young et al., 2019 (C.H. pers. measurements)	Lower part of Lower Lufeng Formation	Eshan County	Yunnan	China	Hettangian	Early Jurassic	?	Left	dt13 from start	Lateral	1.97	1.57	3.25	3.63	0.796954	1.64975	2.42	1.41	0.582645	2.21	1.42	0	0	absent	absent	absent	absent	?	?	?	?	?	?	?	17.5	/	?	17.5	/	17.5	17.5
903	Segnosaurus	Segnosaurus	Therizinosauria	Therizinosauria	MPC-D 100/80	dt3	galbinensis	Zanno et al., 2016	Bayanshiree Formation	Amtgay, Khara-Khutul localities	southeastern Gobi Desert	Mongolia	Upper Cretaceous	Late Cretaceous	Adult	?	dt3	Lateral	7.05	5.68	15.07	16.22	0.805674	2.13759	?	?	?	?	?	?	?	?	?	?	?	?	?	?	?	?	?	?	9	?	?	9	?	9	9
904	Segnosaurus	Segnosaurus	Therizinosauria	Therizinosauria	MPC-D 100/80	dt9	galbinensis	Zanno et al., 2016	Bayanshiree Formation	Amtgay, Khara-Khutul localities	southeastern Gobi Desert	Mongolia	Upper Cretaceous	Late Cretaceous	Adult	?	dt9	Lateral	6.59	5.36	17.81	16.24	0.813354	2.70258	?	?	?	?	?	?	?	?	?	?	?	?	?	?	?	?	?	?	9	?	?	9	?	9	9
905	Segnosaurus	Segnosaurus	Therizinosauria	Therizinosauria	MPC-D 100/80	dt18	galbinensis	Zanno et al., 2016	Bayanshiree Formation	Amtgay, Khara-Khutul localities	southeastern Gobi Desert	Mongolia	Upper Cretaceous	Late Cretaceous	Adult	?	dt18	Lateral	3.99	3.64	10.06	9.58	0.912281	2.5213	?	?	?	?	?	?	?	?	?	?	?	?	?	?	?	?	?	?	9	?	?	9	?	9	9
906	Incisivosaurus	Incisivosaurus	Oviraptorosauria	Oviraptorosauria	IVPP V 13326	pmx2	gauthieri	Young et al., 2019 (C.H. pers. measurements)	lower part of the Yixian Formation	Lujiatun, Shangyuan, Beipiao City	Liaoning	China	Hauterivian	Early Cretaceous	Adult?	Left	pmx2	Mesial	2.06	1.93	5.22	5.64	0.936893	2.53398	?	?	?	/	/	/	?	?	?	absent	absent	?	?	?	?	?	?	/	/	/	/	/	/	/	/
907	Incisivosaurus	Incisivosaurus	Oviraptorosauria	Oviraptorosauria	IVPP V 13326	dt3	gauthieri	Young et al., 2019 (C.H. pers. measurements)	lower part of the Yixian Formation	Lujiatun, Shangyuan, Beipiao City	Liaoning	China	Hauterivian	Early Cretaceous	Adult?	Right	dt3	Lateral	2.12	1.31	1.8	1.71	0.617925	0.849057	?	?	?	/	/	/	?	?	?	absent	absent	?	?	?	?	?	?	/	/	/	/	/	/	/	/
908	Caudipteryx	Caudipteryx	Oviraptorosauria	Oviraptorosauria	IVPP V12430	pmx1	zoui	Young et al., 2019 (C.H. pers. measurements) (measurements taken with ImageJ)	Jianshangou Beds, Yixian Formation	Sihetun area, Beipiao City	Liaoning	China	Barremian	Early Cretaceous	Adult?	Left	pmx1	Mesial	0.45	?	1.42	1.47	?	3.15556	0.42	?	?	/	/	/	absent	absent	absent	absent	?	?	?	?	?	?	?	/	/	/	/	/	/	/	/
909	Caudipteryx	Caudipteryx	Oviraptorosauria	Oviraptorosauria	IVPP V12430	pmx?	zoui	Young et al., 2019 (C.H. pers. measurements) (measurements taken with ImageJ)	Jianshangou Beds, Yixian Formation	Sihetun area, Beipiao City	Liaoning	China	Barremian	Early Cretaceous	Adult?	Left	pmx?	Mesial	0.5	?	2	2.2	?	4	0.32	?	?	/	/	/	absent	absent	absent	absent	?	?	?	?	?	?	?	/	/	/	/	/	/	/	/
910	Caudipteryx	Caudipteryx	Oviraptorosauria	Oviraptorosauria	NGMC 97-9-A	pmx?	zoui	Young et al., 2019 (C.H. pers. measurements) (measurements taken with ImageJ from Ji et al., 1998, figure 7b)	Jianshangou Beds, Yixian Formation	Sihetun area, Beipiao City	Liaoning	China	Barremian	Early Cretaceous	Adult?	?	pmx?	Mesial	0.9	?	3.8	4	?	4.22222	0.64	?	?	/	/	/	absent	absent	absent	absent	?	?	?	?	?	?	?	/	/	/	/	/	/	/	/
911	Bambiraptor	Bambiraptor lateral	Dromaeosauridae	Dromaeosauridae Lateral	AMNH 30556	d06	feinbergi	Young et al., 2019 (C.H. pers. measurements)	Two Medicine Formation	Bynum, Teton County	Montana	U.S.	Campanian	Late Cretaceous	Juvenile/immature	Left	d06	Lateral	2.47	1.42	5.91	7.75	0.574899	2.39271	2.65	1.16	0.437736	4.83	2.92	?	?	?	?	?	?	?	?	?	?	?	?	/	/	/	/	25	25	/	25
912	Bambiraptor	Bambiraptor lateral	Dromaeosauridae	Dromaeosauridae Lateral	AMNH 30556	d05	feinbergi	Young et al., 2019 (C.H. pers. measurements)	Two Medicine Formation	Bynum, Teton County	Montana	U.S.	Campanian	Late Cretaceous	Juvenile/immature	Right	d06	Lateral	2.77	1.21	5.56	6.68	0.436823	2.00722	2.36	1.03	0.436441	?	?	?	?	?	?	?	?	?	?	?	?	?	?	/	/	/	/	30	/	/	30
913	Bambiraptor	Bambiraptor lateral	Dromaeosauridae	Dromaeosauridae Lateral	AMNH 30556	d07	feinbergi	Young et al., 2019 (C.H. pers. measurements)	Two Medicine Formation	Bynum, Teton County	Montana	U.S.	Campanian	Late Cretaceous	Juvenile/immature	Right	d07	Lateral	2.56	1.28	5.61	6.23	0.5	2.19141	2.23	1.08	0.484305	?	?	?	?	?	?	?	?	?	?	?	?	?	?	/	/	/	24	30	/	/	27
914	Bambiraptor	Bambiraptor lateral	Dromaeosauridae	Dromaeosauridae Lateral	AMNH 30556	mx01	feinbergi	Young et al., 2019 (C.H. pers. measurements)	Two Medicine Formation	Bynum, Teton County	Montana	U.S.	Campanian	Late Cretaceous	Juvenile/immature	Left	mx01	Lateral	2.85	1.33	6.13	6.8	0.466667	2.15088	2.22	1.13	0.509009	?	?	?	?	?	?	?	?	?	?	?	?	?	?	/	/	/	/	25	/	/	25
915	Bambiraptor	Bambiraptor lateral	Dromaeosauridae	Dromaeosauridae Lateral	AMNH 30556	mx03	feinbergi	Young et al., 2019 (C.H. pers. measurements)	Two Medicine Formation	Bynum, Teton County	Montana	U.S.	Campanian	Late Cretaceous	Juvenile/immature	Left	mx03	Lateral	3.3	1.47	6.43	7.1	0.445455	1.94848	2.78	1.18	0.42446	?	?	?	?	?	?	?	?	?	?	?	?	?	?	/	/	/	/	24.2	/	/	24.2
916	Bambiraptor	Bambiraptor lateral	Dromaeosauridae	Dromaeosauridae Lateral	AMNH 30556	mx05	feinbergi	Young et al., 2019 (C.H. pers. measurements)	Two Medicine Formation	Bynum, Teton County	Montana	U.S.	Campanian	Late Cretaceous	Juvenile/immature	Left	mx05	Lateral	2.64	1.33	6.22	6.66	0.503788	2.35606	2.87	1.12	0.390244	?	?	?	?	?	?	?	?	?	?	?	?	?	?	/	/	/	/	32.5	/	/	32.5
917	Bambiraptor	Bambiraptor lateral	Dromaeosauridae	Dromaeosauridae Lateral	AMNH 30556	d06	feinbergi	Smith et al., 2005	Two Medicine Formation	Bynum, Teton County	Montana	U.S.	Campanian	Late Cretaceous	Juvenile/immature	Comp/	d06	Lateral	2.37	1.41	5.33	7.28	0.594937	2.24895	?	?	?	?	?	?	?	?	?	?	?	?	?	?	?	22.1	-0.53	/	/	/	/	25	25	/	25
918	Bambiraptor	Bambiraptor lateral	Dromaeosauridae	Dromaeosauridae Lateral	AMNH 30556	d08	feinbergi	Smith et al., 2005	Two Medicine Formation	Bynum, Teton County	Montana	U.S.	Campanian	Late Cretaceous	Juvenile/immature	Comp/	d08	Lateral	2.34	1.41	5.01	6.53	0.602564	2.14103	?	?	?	?	?	?	?	?	?	?	?	?	?	?	?	20.95	-0.59	/	/	/	20	25	/	/	22.5
919	Bambiraptor	Bambiraptor lateral	Dromaeosauridae	Dromaeosauridae Lateral	AMNH 30556	d09	feinbergi	Smith et al., 2005	Two Medicine Formation	Bynum, Teton County	Montana	U.S.	Campanian	Late Cretaceous	Juvenile/immature	Left	d09	Lateral	2.08	1.4	4.82	5.25	0.673077	2.31731	?	?	?	?	?	?	?	?	?	?	?	?	?	?	?	31.88	-0.15	/	/	/	30	?	/	/	30
920	Bambiraptor	Bambiraptor lateral	Dromaeosauridae	Dromaeosauridae Lateral	AMNH 30556	d05	feinbergi	Smith et al., 2005	Two Medicine Formation	Bynum, Teton County	Montana	U.S.	Campanian	Late Cretaceous	Juvenile/immature	Right	d05	Lateral	2.37	1.61	4.91	6.83	0.679325	2.07173	?	?	?	?	?	?	?	?	?	?	?	?	?	?	?	11.89	-1.03	/	/	/	/	30	/	/	30
921	Bambiraptor	Bambiraptor lateral	Dromaeosauridae	Dromaeosauridae Lateral	AMNH 30556	d07	feinbergi	Smith et al., 2005	Two Medicine Formation	Bynum, Teton County	Montana	U.S.	Campanian	Late Cretaceous	Juvenile/immature	Right	d07	Lateral	2.47	1.24	5.58	6.39	0.502024	2.25911	?	?	?	?	?	?	?	?	?	?	?	?	?	?	?	39.74	-0.03	/	/	/	24	30	/	/	27
922	Bambiraptor	Bambiraptor lateral	Dromaeosauridae	Dromaeosauridae Lateral	AMNH 30556	mx04	feinbergi	Smith et al., 2005	Two Medicine Formation	Bynum, Teton County	Montana	U.S.	Campanian	Late Cretaceous	Juvenile/immature	Left	mx04	Lateral	2.61	1.41	5.99	7.13	0.54023	2.29502	?	?	?	?	?	?	?	?	?	?	?	?	?	?	?	41.83	-0.01	/	/	/	/	25	/	/	25
923	Bambiraptor	Bambiraptor lateral	Dromaeosauridae	Dromaeosauridae Lateral	AMNH 30556	mx06	feinbergi	Smith et al., 2005	Two Medicine Formation	Bynum, Teton County	Montana	U.S.	Campanian	Late Cretaceous	Juvenile/immature	Left	mx06	Lateral	2.35	1.2	5.86	6.86	0.510638	2.49362	?	?	?	?	?	?	?	?	?	?	?	?	?	?	?	39.8	-0.03	/	/	/	/	24.2	/	/	24.2
924	Bambiraptor	Bambiraptor lateral	Dromaeosauridae	Dromaeosauridae Lateral	AMNH 30556	mx09	feinbergi	Smith et al., 2005	Two Medicine Formation	Bynum, Teton County	Montana	U.S.	Campanian	Late Cretaceous	Juvenile/immature	Left	mx09	Lateral	2.54	0.99	4.62	5.14	0.389764	1.8189	?	?	?	?	?	?	?	?	?	?	?	?	?	?	?	30.01	-0.29	/	/	/	/	32.5	/	/	32.5
925	Bambiraptor	Bambiraptor lateral	Dromaeosauridae	Dromaeosauridae Lateral	AMNH 30556	Isolated	feinbergi	Smith et al., 2005	Two Medicine Formation	Bynum, Teton County	Montana	U.S.	Campanian	Late Cretaceous	Juvenile/immature	/	Isolated	Lateral	3.22	1.37	5.66	6.95	0.425466	1.75776	?	?	?	?	?	?	?	?	?	?	?	?	?	?	?	41.88	-0.08	/	/	/	35	23.7	32.5	/	30.4
926	Bambiraptor	Bambiraptor mesial	Dromaeosauridae	Dromaeosauridae Mesial	AMNH 30556	Isolated	feinbergi	Smith et al., 2005	Two Medicine Formation	Bynum, Teton County	Montana	U.S.	Campanian	Late Cretaceous	Juvenile/immature	/	Isolated, most mesial?	Mesial	2.15	1.57	4.03	4.39	0.730233	1.87442	?	?	?	?	?	?	?	?	?	?	?	?	?	?	?	10.74	-1.12	/	/	/	/	?	25	/	25
927	Deinonychus	Deinonychus mesial	Dromaeosauridae	Dromaeosauridae Mesial	YPM 5232 66-11	d1	antirrhopus	Young et al., 2019 (C.H. pers. measurements)	Cloverly Formation	Carbon County	Montana	U.S.	Aptian - Albian	'Middle Cretaceous'	Adult	Left	d01	Mesial	5.03	2.99	8.94	10.46	0.594433	1.77734	4.58	2.41	0.526201	0	10.46	100	0	absent	absent	absent	absent	?	?	?	?	?	?	?	?	?	17.5	16.5	?	?	17
928	Deinonychus	Deinonychus lateral	Dromaeosauridae	Dromaeosauridae Lateral	YPM 5232 66-11	d12	antirrhopus	Young et al., 2019 (C.H. pers. measurements)	Cloverly Formation	Carbon County	Montana	U.S.	Aptian - Albian	'Middle Cretaceous'	Adult	Left	d12	Lateral	7.06	3.2	10.44	12.81	0.453258	1.47875	5.63	2.73	0.484902	5.37	7.44	58.0796	2/1mm	tenuous basolabial and basocentral	D short on labial	absent	absent	?	?	?	?	?	?	30	30	/	25	16.8	?	30	20.9
929	Deinonychus	Deinonychus lateral	Dromaeosauridae	Dromaeosauridae Lateral	YPM 5232 66-11	d13	antirrhopus	Young et al., 2019 (C.H. pers. measurements)	Cloverly Formation	Carbon County	Montana	U.S.	Aptian - Albian	'Middle Cretaceous'	Adult	Comp/	d13	Lateral	6.68	3.02	9.88	12.74	0.452096	1.47904	5.91	2.78	0.470389	6.11	6.63	52.0408	0	absent	D short on labial	absent	absent	?	?	?	?	?	?	32.5	35	/	20	17.5	?	33.75	18.75
930	Deinonychus	Deinonychus lateral	Dromaeosauridae	Dromaeosauridae Lateral	YPM 5232 612	d second	antirrhopus	Young et al., 2019 (C.H. pers. measurements)	Cloverly Formation	Carbon County	Montana	U.S.	Aptian - Albian	'Middle Cretaceous'	Adult	Right	d second	Lateral	7.25	3.38	11.07	11.72	0.466207	1.5269	5.82	2.87	0.493127	4.59	7.13	60.8362	2/1mm	very tenuous labiodistal	D short on labial	absent	absent	?	?	?	?	?	?	?	?	?	21.25	16.25	?	?	18.75
931	Deinonychus	Deinonychus lateral	Dromaeosauridae	Dromaeosauridae Lateral	YPM 5232 612	d third	antirrhopus	Young et al., 2019 (C.H. pers. measurements)	Cloverly Formation	Carbon County	Montana	U.S.	Aptian - Albian	'Middle Cretaceous'	Adult	Right	d third	Lateral	7.06	2.89	9.82	10.65	0.409348	1.39093	5.46	2.58	0.472527	4.6	6.05	56.8075	2/1mm	tenuous to visible with light on labial and lingual sides	D medium on labial	absent	absent	?	?	?	?	?	?	30	35	/	22.5	18.75	21.25	32.5	20.83
932	Deinonychus	Deinonychus lateral	Dromaeosauridae	Dromaeosauridae Lateral	YPM 5232 612	d fifth	antirrhopus	Young et al., 2019 (C.H. pers. measurements)	Cloverly Formation	Carbon County	Montana	U.S.	Aptian - Albian	'Middle Cretaceous'	Adult	Right	d fifth	Lateral	4.94	2.51	6.23	6.18	0.508097	1.26113	3.71	2.02	0.544474	1.78	4.4	71.1974	0	absent	D short on labial	absent	absent	?	?	?	?	?	?	30	30	/	22.5	18.75	?	30	20.625
933	Deinonychus	Deinonychus lateral	Dromaeosauridae	Dromaeosauridae Lateral	YPM 5232 557	d fourth	antirrhopus	Young et al., 2019 (C.H. pers. measurements)	Cloverly Formation	Carbon County	Montana	U.S.	Aptian - Albian	'Middle Cretaceous'	Adult	Right	d fourth	Lateral	9.28	3.26	14.25	14.69	0.351293	1.53556	5.52	3.19	0.577899	?	?	?	2/1mm	tenuous, many closely packed on basolabial	D medium on labial	absent	absent	?	?	?	?	?	?	27.5	?	?	19.16	13.5	?	27.5	16.33
934	Deinonychus	Deinonychus lateral	Dromaeosauridae	Dromaeosauridae Lateral	YPM 5232 557	mx3	antirrhopus	Young et al., 2019 (C.H. pers. measurements)	Cloverly Formation	Carbon County	Montana	U.S.	Aptian - Albian	'Middle Cretaceous'	Adult	Right	mx3	Lateral	7.26	4.11	15.72	14.97	0.566116	2.16529	5.99	3.41	0.569282	0	14.97	100	2/2mm	very tenuous on apicolabial side	absent	absent	absent	?	?	?	?	?	?	?	27.5	?	17.5	16.25	18.75	27.5	17.5
935	Deinonychus	Deinonychus lateral	Dromaeosauridae	Dromaeosauridae Lateral	YPM 5232 609	mx? Isolated	antirrhopus	Young et al., 2019 (C.H. pers. measurements)	Cloverly Formation	Carbon County	Montana	U.S.	Aptian - Albian	'Middle Cretaceous'	Adult	/	mx? Isolated	Lateral	8.84	3.96	15.28	16.3	0.447964	1.72851	6.25	2.98	0.4768	8.17	8.13	49.8773	2/2mm	numerous very tenous on labial side	absent	absent	absent	?	?	?	?	?	?	?	?	/	17	15.5	18.33	?	16.94
936	Deinonychus	Deinonychus lateral	Dromaeosauridae	Dromaeosauridae Lateral	YPM 5232 610C	Isolated	antirrhopus	Young et al., 2019 (C.H. pers. measurements)	Cloverly Formation	Carbon County	Montana	U.S.	Aptian - Albian	'Middle Cretaceous'	Adult	/	Isolated	Lateral	6.96	2.92	9.78	11.36	0.41954	1.40517	5.35	2.63	0.491589	2.88	8.48	74.6479	2/1mm	very tenuous on labial side	D short on labial	absent	absent	?	?	?	?	?	?	30	27.5	/	20.83	19.16	22.5	28.75	20.83
937	Deinonychus	Deinonychus mesial	Dromaeosauridae	Dromaeosauridae Mesial	YPM 5232 610 full crown no root with spalled surface	Isolated	antirrhopus	Young et al., 2019 (C.H. pers. measurements)	Cloverly Formation	Carbon County	Montana	U.S.	Aptian - Albian	'Middle Cretaceous'	Adult	/	Isolated	Mesial	8.02	4.63	15.64	15.56	0.577307	1.95012	6.32	3.54	0.560127	5.5	10.06	64.653	2/1mm	very tenuous on labial side	absent	absent	absent	?	?	?	?	?	?	?	30	/	15	15	20	30	16.66
938	Deinonychus	Deinonychus mesial	Dromaeosauridae	Dromaeosauridae Mesial	YPM 5232 83	Isolated	antirrhopus	Young et al., 2019 (C.H. pers. measurements)	Cloverly Formation	Carbon County	Montana	U.S.	Aptian - Albian	'Middle Cretaceous'	Adult	/	Isolated	Mesial	7.91	4.61	16.6	16.87	0.582807	2.09861	6.69	3.63	0.542601	3.97	12.9	76.4671	2/2mm	tenuous, visible with light on labial	absent	absent	absent	?	?	?	?	?	?	?	?	/	16.25	15.83	18.125	?	16.735
939	Deinonychus	Deinonychus lateral	Dromaeosauridae	Dromaeosauridae Lateral	YPM 5232 17	Isolated	antirrhopus	Young et al., 2019 (C.H. pers. measurements)	Cloverly Formation	Carbon County	Montana	U.S.	Aptian - Albian	'Middle Cretaceous'	Adult	/	Isolated	Lateral	9.84	4.8	18.81	19.58	0.487805	1.91159	7.45	4.3	0.577181	1.43	18.15	92.6966	3/4mm	well-visible with light on labial, tenuous on lingual	absent	absent	absent	?	?	?	?	?	?	?	32.5	/	18.33	16	23.33	32.5	19.22
940	Deinonychus	Deinonychus lateral	Dromaeosauridae	Dromaeosauridae Lateral	YPM 5232 78	Isolated	antirrhopus	Young et al., 2019 (C.H. pers. measurements)	Cloverly Formation	Carbon County	Montana	U.S.	Aptian - Albian	'Middle Cretaceous'	Adult	/	Isolated	Lateral	8.24	4.29	13.85	14.82	0.520631	1.68083	6.68	3.87	0.579341	5.19	9.63	64.9798	2/2mm	very tenous on apicolabial	D short on labial	absent	absent	?	?	?	?	?	?	30	27.5	/	20	15.83	21.25	28.75	19.03
941	Deinonychus	Deinonychus lateral	Dromaeosauridae	Dromaeosauridae Lateral	YPM 5232 285	Isolated	antirrhopus	Young et al., 2019 (C.H. pers. measurements)	Cloverly Formation	Carbon County	Montana	U.S.	Aptian - Albian	'Middle Cretaceous'	Adult	/	Isolated	Lateral	7.9	4.39	14.49	15.05	0.555696	1.83418	6.31	3.84	0.608558	5.39	9.66	64.186	2/2mm	tenous on labial side	absent	absent	absent	?	?	?	?	?	?	27.5	?	/	18.33	17.5	20.83	27.5	18.88
942	Deinonychus	Deinonychus lateral	Dromaeosauridae	Dromaeosauridae Lateral	YPM 5232 305	Isolated	antirrhopus	Young et al., 2019 (C.H. pers. measurements)	Cloverly Formation	Carbon County	Montana	U.S.	Aptian - Albian	'Middle Cretaceous'	Adult	/	Isolated	Lateral	9.14	4.39	15.16	15.63	0.480306	1.65864	6.69	3.63	0.542601	4.58	11.05	70.6974	2/2mm	tenous on distolabial	D short on lingual	absent	absent	?	?	?	?	?	?	27.5	32.5	/	20	19.16	22.5	30	20.55
943	Deinonychus	Deinonychus mesial	Dromaeosauridae	Dromaeosauridae Mesial	YPM 5232 66-11	d01	antirrhopus	Smith et al., 2005	Cloverly Formation	Carbon County	Montana	U.S.	Aptian - Albian	'Middle Cretaceous'	Adult	Left	d01	Mesial	5.07	3	8.85	10.37	0.591716	1.74556	?	?	?	?	?	?	?	?	?	?	?	?	?	?	?	62.34	0.13	/	24.8	/	17.7	17.2	25	24.8	19.4
944	Deinonychus	Deinonychus lateral	Dromaeosauridae	Dromaeosauridae Lateral	YPM 5232 66-11	d12	antirrhopus	Smith et al., 2005	Cloverly Formation	Carbon County	Montana	U.S.	Aptian - Albian	'Middle Cretaceous'	Adult	Left	d12	Lateral	7.07	3.2	10.07	12.31	0.452617	1.42433	?	?	?	?	?	?	?	?	?	?	?	?	?	?	?	66.71	0.05	32	29.5	/	22.3	17.5	/	28.4	17.3
945	Deinonychus	Deinonychus lateral	Dromaeosauridae	Dromaeosauridae Lateral	YPM 5232 66-11	d13	antirrhopus	Smith et al., 2005	Cloverly Formation	Carbon County	Montana	U.S.	Aptian - Albian	'Middle Cretaceous'	Adult	Comp/	d13	Lateral	6.76	2.93	9.56	12.29	0.433432	1.4142	?	?	?	?	?	?	?	?	?	?	?	?	?	?	?	65.04	0.07	35	27.5	30	20	16.3	27.5	30.8	21.3
946	Deinonychus	Deinonychus lateral	Dromaeosauridae	Dromaeosauridae Lateral	YPM 5232 612	d14	antirrhopus	Smith et al., 2005	Cloverly Formation	Carbon County	Montana	U.S.	Aptian - Albian	'Middle Cretaceous'	Adult	Right	d14	Lateral	6.74	2.8	9.14	11.78	0.41543	1.35608	?	?	?	?	?	?	?	?	?	?	?	?	?	?	?	64.12	0.03	33.8	29.5	28.5	24.3	17.8	23.8	30.4	18.8
947	Deinonychus	Deinonychus lateral	Dromaeosauridae	Dromaeosauridae Lateral	YPM 5232 612	d16	antirrhopus	Smith et al., 2005	Cloverly Formation	Carbon County	Montana	U.S.	Aptian - Albian	'Middle Cretaceous'	Adult	Right	d16	Lateral	5.35	2.41	6.53	8.35	0.450467	1.22056	?	?	?	?	?	?	?	?	?	?	?	?	?	?	?	53.03	-0.09	32.3	29	29.8	20.5	17.5	20.3	30.3	19.4
948	Deinonychus	Deinonychus lateral	Dromaeosauridae	Dromaeosauridae Lateral	YPM 5232 557	d07	antirrhopus	Smith et al., 2005	Cloverly Formation	Carbon County	Montana	U.S.	Aptian - Albian	'Middle Cretaceous'	Adult	Right	d07	Lateral	7.15	3.23	11.01	13.5	0.451748	1.53986	?	?	?	?	?	?	?	?	?	?	?	?	?	?	?	68.35	0.09	/	28.5	/	17.5	17.5	17.5	29	17.5
949	Deinonychus	Deinonychus lateral	Dromaeosauridae	Dromaeosauridae Lateral	YPM 5232 557	d08	antirrhopus	Smith et al., 2005	Cloverly Formation	Carbon County	Montana	U.S.	Aptian - Albian	'Middle Cretaceous'	Adult	Right	d08	Lateral	6.36	3.07	10.4	12.1	0.482704	1.63522	?	?	?	?	?	?	?	?	?	?	?	?	?	?	?	67.24	0.11	/	28.5	/	/	?	17.5	29	17.5
950	Deinonychus	Deinonychus lateral	Dromaeosauridae	Dromaeosauridae Lateral	YPM 5232 557	d10	antirrhopus	Smith et al., 2005	Cloverly Formation	Carbon County	Montana	U.S.	Aptian - Albian	'Middle Cretaceous'	Adult	Right	d10	Lateral	7.04	3.2	12.23	14.17	0.454545	1.73722	?	?	?	?	?	?	?	?	?	?	?	?	?	?	?	70.57	0.13	/	27.5	/	15	17.5	17.5	27.5	16.8
951	Deinonychus	Deinonychus lateral	Dromaeosauridae	Dromaeosauridae Lateral	YPM 5232 557	mx01	antirrhopus	Smith et al., 2005	Cloverly Formation	Carbon County	Montana	U.S.	Aptian - Albian	'Middle Cretaceous'	Adult	Right	mx01	Lateral	7.13	4	13.58	16.14	0.56101	1.90463	?	?	?	?	?	?	?	?	?	?	?	?	?	?	?	71.87	0.17	27.5	25	/	20	15	/	26.3	17.5
952	Deinonychus	Deinonychus mesial	Dromaeosauridae	Dromaeosauridae Mesial	YPM 5232 557	pm01	antirrhopus	Smith et al., 2005	Cloverly Formation	Carbon County	Montana	U.S.	Aptian - Albian	'Middle Cretaceous'	Adult	Right	pm01	Mesial	5.74	3.2	11.79	10.8	0.557491	2.05401	?	?	?	?	?	?	?	?	?	?	?	?	?	?	?	73.56	0.26	20	?	/	15	20	17.5	20	17.5
953	Deinonychus	Deinonychus lateral	Dromaeosauridae	Dromaeosauridae Lateral	MCZ8791	mx03	antirrhopus	Smith et al., 2005	Cloverly Formation	Carbon County	Montana	U.S.	Aptian - Albian	'Middle Cretaceous'	?	Left	mx03	Lateral	6.11	2.58	8.77	13.7	0.422259	1.43535	?	?	?	?	?	?	?	?	?	?	?	?	?	?	?	60.88	0.02	27.3	28	29.8	27	17.3	16.8	28.4	20.4
954	Acheroraptor	Acheroraptor lateral	Dromaeosauridae	Dromaeosauridae Lateral	ROM 63777	Mx-3	temertyorum	Evans et al., 2013	Hell Creek Formation	45 km southwest of the town of Jordan, Garfield County	Montana	USA	Upper Maastrichtian	Late Cretaceous	Adult?	Right	Mx-3	Lateral	7.5	3.375	13.125	?	0.45	1.75	?	?	?	?	?	?	?	?	?	?	?	?	?	?	?	?	?	?	39	?	?	23	?	39	23
955	Acheroraptor	Acheroraptor lateral	Dromaeosauridae	Dromaeosauridae Lateral	ROM 63777	Mx-5	temertyorum	Evans et al., 2013	Hell Creek Formation	45 km southwest of the town of Jordan, Garfield County	Montana	USA	Upper Maastrichtian	Late Cretaceous	Adult?	Right	Mx-5	Lateral	7.375	3	12	?	0.40678	1.62712	?	?	?	?	?	?	?	?	?	?	?	?	?	?	?	?	?	?	33	?	?	23.5	?	33	23.5
956	Acheroraptor	Acheroraptor lateral	Dromaeosauridae	Dromaeosauridae Lateral	ROM 63777	Mx-7	temertyorum	Evans et al., 2013	Hell Creek Formation	45 km southwest of the town of Jordan, Garfield County	Montana	USA	Upper Maastrichtian	Late Cretaceous	Adult?	Right	Mx-7	Lateral	6.375	3	10.125	?	0.470588	1.58824	?	?	?	?	?	?	?	?	?	?	?	?	?	?	?	?	?	?	38	?	?	24	?	38	24
957	Acheroraptor	Acheroraptor lateral	Dromaeosauridae	Dromaeosauridae Lateral	ROM 63777	Isolated	temertyorum	Evans et al., 2013	Hell Creek Formation	45 km southwest of the town of Jordan, Garfield County	Montana	USA	Upper Maastrichtian	Late Cretaceous	Adult?	/	Isolated	Lateral	7.125	3.25	12	?	0.45614	1.68421	?	?	?	?	?	?	?	?	?	?	?	?	?	?	?	?	?	?	?	?	?	22	?	?	22
958	Dromaeosaurus	Dromaeosaurus lateral	Dromaeosauridae	Dromaeosauridae Lateral	AMNH 5356	mx3	albertensis	Hendrickx et al., 2015	Dinosaur Park Formation	Little Sandy Creek, Dinosaur Provincial Park	Alberta	Canada	Campanian - Early Maastrichtian	Late Cretaceous	Adult	Left	mx3	Lateral	7.95	4.84	17.97	21.66	0.608805	2.26038	6.73	4.5	0.668648	?	?	?	3/2mm	visible labially	absent	absent	absent	?	?	?	?	?	?	?	15	/	17.5	17.5	18.75	15	17.91
959	Dromaeosaurus	Dromaeosaurus lateral	Dromaeosauridae	Dromaeosauridae Lateral	AMNH 5356	mx3	albertensis	Hendrickx et al., 2015	Dinosaur Park Formation	Little Sandy Creek, Dinosaur Provincial Park	Alberta	Canada	Campanian - Early Maastrichtian	Late Cretaceous	Adult	Right	mx3	Lateral	6.91	4.18	12.34	15.5	0.60492	1.78582	5.71	3.36	0.588441	0	15.5	100	0	absent	absent	absent	absent	?	?	?	?	?	?	?	17.5	17.5	18.33	16.25	20	17.5	18.19
960	Dromaeosaurus	Dromaeosaurus mesial	Dromaeosauridae	Dromaeosauridae Mesial	AMNH 5356	dt2	albertensis	Hendrickx et al., 2015	Dinosaur Park Formation	Little Sandy Creek, Dinosaur Provincial Park	Alberta	Canada	Campanian - Early Maastrichtian	Late Cretaceous	Adult	Left	dt2	Mesial	5.99	4.45	12.8	14	0.742905	2.13689	4.8	3.26	0.679167	5.6	8.4	60	?	tenuous at the base of the labial side	absent	absent	absent	?	?	?	?	?	?	?	17.5	/	?	20	?	17.5	20
961	Dromaeosaurus	Dromaeosaurus lateral	Dromaeosauridae	Dromaeosauridae Lateral	AMNH 5356	dt3	albertensis	Hendrickx et al., 2015	Dinosaur Park Formation	Little Sandy Creek, Dinosaur Provincial Park	Alberta	Canada	Campanian - Early Maastrichtian	Late Cretaceous	Adult	Left	dt3	Lateral	6.19	3.97	13.78	13.91	0.641357	2.22617	5.58	3.42	0.612903	?	?	?	?	tenuous at the base of the labial side	short	absent	absent	?	?	?	?	?	?	?	15	/	18.33	15.83	20	15	18.05
962	Dromaeosaurus	Dromaeosaurus lateral	Dromaeosauridae	Dromaeosauridae Lateral	AMNH 5356	dt5	albertensis	Hendrickx et al., 2015	Dinosaur Park Formation	Little Sandy Creek, Dinosaur Provincial Park	Alberta	Canada	Campanian - Early Maastrichtian	Late Cretaceous	Adult	Left	dt5	Lateral	7.24	4.06	14.77	15.27	0.560773	2.04006	5.91	3.28	0.554992	?	?	?	?	tenuous at the base of the labial side	absent	absent	absent	?	?	?	?	?	?	?	14.5	/	?	?	?	14.5	?
963	Dromaeosaurus	Dromaeosaurus lateral	Dromaeosauridae	Dromaeosauridae Lateral	AMNH 5356	dt8	albertensis	Hendrickx et al., 2015	Dinosaur Park Formation	Little Sandy Creek, Dinosaur Provincial Park	Alberta	Canada	Campanian - Early Maastrichtian	Late Cretaceous	Adult	Left	dt8	Lateral	5.57	3.26	10.14	11.05	0.585278	1.82047	5.18	2.94	0.567568	3.92	7.13	64.5249	?	?	absent	absent	absent	?	?	?	?	?	?	?	17.5	/	?	18.75	?	17.5	18.75
964	Dromaeosaurus	Dromaeosaurus lateral	Dromaeosauridae	Dromaeosauridae Lateral	AMNH 5356	dt9	albertensis	Hendrickx et al., 2015	Dinosaur Park Formation	Little Sandy Creek, Dinosaur Provincial Park	Alberta	Canada	Campanian - Early Maastrichtian	Late Cretaceous	Adult	Left	dt9	Lateral	6.18	3.48	9.98	11.37	0.563107	1.61489	5.45	2.9	0.53211	?	?	?	?	?	absent	absent	absent	?	?	?	?	?	?	?	?	?	?	22.5	?	?	22.5
965	Dromaeosaurus	Dromaeosaurus mesial	Dromaeosauridae	Dromaeosauridae Mesial	AMNH 5356	Isolated, mesial (with long wear facet)	albertensis	Hendrickx et al., 2015	Dinosaur Park Formation	Little Sandy Creek, Dinosaur Provincial Park	Alberta	Canada	Campanian - Early Maastrichtian	Late Cretaceous	Adult	Right	Isolated, mesial (with long wear facet)	Mesial	4.45	4.2	10.87	11.29	0.94382	2.4427	3.59	3.35	0.933148	0	11.29	100	0	absent	absent	absent	absent	?	?	?	?	?	?	20	15	15.83	16.66	14.16	16.63	16.94	15.82
966	Dromaeosaurus	Dromaeosaurus mesial	Dromaeosauridae	Dromaeosauridae Mesial	AMNH 5356	Isolated, mesial (largest one)	albertensis	Hendrickx et al., 2015	Dinosaur Park Formation	Little Sandy Creek, Dinosaur Provincial Park	Alberta	Canada	Campanian - Early Maastrichtian	Late Cretaceous	Adult	Right	Isolated, mesial (with root)	Mesial	4.99	5.99	13.15	12.72	1.2004	2.63527	4.28	4.36	1.01869	0	12.72	100	0	absent	absent	absent	absent	?	?	?	?	?	?	15.83	12.5	?	22.5	15	14.16	14.165	17.22
967	Dromaeosaurus	Dromaeosaurus mesial	Dromaeosauridae	Dromaeosauridae Mesial	AMNH 5356	Isolated, mesial (with piece of root)	albertensis	Hendrickx et al., 2015	Dinosaur Park Formation	Little Sandy Creek, Dinosaur Provincial Park	Alberta	Canada	Campanian - Early Maastrichtian	Late Cretaceous	Adult	Left	Isolated, mesial (with piece of root)	Mesial	4.22	4.15	9.02	10.96	0.983412	2.13744	3.5	3.34	0.954286	0	10.96	100	0	absent	absent	absent	absent	?	?	?	?	?	?	16	14.16	16.66	16.66	15	15	15.6	15.55
968	Dromaeosaurus	Dromaeosaurus lateral	Dromaeosauridae	Dromaeosauridae Lateral	AMNH 5356	mx03	albertensis	Smith et al., 2005	Dinosaur Park Formation	Little Sandy Creek, Dinosaur Provincial Park	Alberta	Canada	Campanian - Early Maastrichtian	Late Cretaceous	Adult	Comp/	mx03	Lateral	7.21	4.06	12.86	15.8	0.563107	1.78363	?	?	?	?	?	?	?	?	?	?	?	?	?	?	?	70.76	0.15	22	13.8	15	18	17	19.5	16.9	18.2
969	Dromaeosaurus	Dromaeosaurus lateral	Dromaeosauridae	Dromaeosauridae Lateral	AMNH 5356	mx04	albertensis	Smith et al., 2005	Dinosaur Park Formation	Little Sandy Creek, Dinosaur Provincial Park	Alberta	Canada	Campanian - Early Maastrichtian	Late Cretaceous	Adult	Comp/	mx04	Lateral	6.84	3.7	11.58	13.97	0.540936	1.69298	?	?	?	?	?	?	?	?	?	?	?	?	?	?	?	69.08	0.13	/	16	15	/	20	15	15.7	17.5
970	Dromaeosaurus	Dromaeosaurus lateral	Dromaeosauridae	Dromaeosauridae Lateral	AMNH 5356	mx05	albertensis	Smith et al., 2005	Dinosaur Park Formation	Little Sandy Creek, Dinosaur Provincial Park	Alberta	Canada	Campanian - Early Maastrichtian	Late Cretaceous	Adult	Left	mx05	Lateral	7.64	4.02	12.38	16.37	0.526178	1.62042	?	?	?	?	?	?	?	?	?	?	?	?	?	?	?	69.92	0.12	18.8	17.5	15.8	22.5	17.5	17.5	17.1	19.2
971	Dromaeosaurus	Dromaeosaurus lateral	Dromaeosauridae	Dromaeosauridae Lateral	AMNH 5356	mx06	albertensis	Smith et al., 2005	Dinosaur Park Formation	Little Sandy Creek, Dinosaur Provincial Park	Alberta	Canada	Campanian - Early Maastrichtian	Late Cretaceous	Adult	Comp/	mx06	Lateral	6.28	3.13	10.68	12.4	0.498408	1.70064	?	?	?	?	?	?	?	?	?	?	?	?	?	?	?	67.66	0.16	28	18.8	8.8	20.7	20	15	20.7	22.1
972	Dromaeosaurus	Dromaeosaurus lateral	Dromaeosauridae	Dromaeosauridae Lateral	AMNH 5356	mx02	albertensis	Smith et al., 2005	Dinosaur Park Formation	Little Sandy Creek, Dinosaur Provincial Park	Alberta	Canada	Campanian - Early Maastrichtian	Late Cretaceous	Adult	Right	mx02	Lateral	6.69	3.32	10.98	12.89	0.496263	1.64126	?	?	?	?	?	?	?	?	?	?	?	?	?	?	?	68.39	0.12	18.8	17.5	15	20	17.5	16.3	17.1	17.9
973	Dromaeosaurus	Dromaeosaurus lateral	Dromaeosauridae	Dromaeosauridae Lateral	AMNH 5356	mx07	albertensis	Smith et al., 2005	Dinosaur Park Formation	Little Sandy Creek, Dinosaur Provincial Park	Alberta	Canada	Campanian - Early Maastrichtian	Late Cretaceous	Adult	Right	mx07	Lateral	5.7	3.11	9.7	11	0.545614	1.70175	?	?	?	?	?	?	?	?	?	?	?	?	?	?	?	65.64	0.16	/	?	?	?	?	22.5	17.5	22.5
974	Dromaeosaurus	Dromaeosaurus mesial	Dromaeosauridae	Dromaeosauridae Mesial	AMNH 5356	d02	albertensis	Smith et al., 2005	Dinosaur Park Formation	Little Sandy Creek, Dinosaur Provincial Park	Alberta	Canada	Campanian - Early Maastrichtian	Late Cretaceous	Adult	Left	d02	Mesial	5.46	4.03	9.4	10.5	0.738095	1.72161	?	?	?	?	?	?	?	?	?	?	?	?	?	?	?	64.99	0.19	/	15	17.5	25	?	/	16.3	25
975	Dromaeosaurus	Dromaeosaurus lateral	Dromaeosauridae	Dromaeosauridae Lateral	AMNH 5356	d03	albertensis	Smith et al., 2005	Dinosaur Park Formation	Little Sandy Creek, Dinosaur Provincial Park	Alberta	Canada	Campanian - Early Maastrichtian	Late Cretaceous	Adult	Left	d03	Lateral	6.09	3.81	11.55	12.34	0.625616	1.89655	?	?	?	?	?	?	?	?	?	?	?	?	?	?	?	70.23	0.19	/	13.8	/	21.3	15	15	13.8	17.1
976	Dromaeosaurus	Dromaeosaurus lateral	Dromaeosauridae	Dromaeosauridae Lateral	AMNH 5356	d04	albertensis	Smith et al., 2005	Dinosaur Park Formation	Little Sandy Creek, Dinosaur Provincial Park	Alberta	Canada	Campanian - Early Maastrichtian	Late Cretaceous	Adult	Left	d04	Lateral	6.47	3.91	11.22	13.1	0.604328	1.73416	?	?	?	?	?	?	?	?	?	?	?	?	?	?	?	68.66	0.15	21.5	17	15	18	17.5	19	17.8	18.2
977	Dromaeosaurus	Dromaeosaurus lateral	Dromaeosauridae	Dromaeosauridae Lateral	AMNH 5356	d05	albertensis	Smith et al., 2005	Dinosaur Park Formation	Little Sandy Creek, Dinosaur Provincial Park	Alberta	Canada	Campanian - Early Maastrichtian	Late Cretaceous	Adult	Left	d05	Lateral	6.56	3.89	11.27	12.99	0.592988	1.71799	?	?	?	?	?	?	?	?	?	?	?	?	?	?	?	68.96	0.15	21.5	17	15	18	17.5	19	17.8	18.2
978	Dromaeosaurus	Dromaeosaurus lateral	Dromaeosauridae	Dromaeosauridae Lateral	AMNH 5356	d08	albertensis	Smith et al., 2005	Dinosaur Park Formation	Little Sandy Creek, Dinosaur Provincial Park	Alberta	Canada	Campanian - Early Maastrichtian	Late Cretaceous	Adult	Left	d08	Lateral	5.56	3.27	8.52	10.7	0.588129	1.53237	?	?	?	?	?	?	?	?	?	?	?	?	?	?	?	61.27	0.06	/	17	/	/	17.5	/	17	17.5
979	Velociraptor	Velociraptor mesial	Dromaeosauridae	Dromaeosauridae Mesial	AMNH 6515	pmx1	mongoliensis	Hendrickx et al., 2015	Djadochta Formation	Shabarakh Usu	Central Mongolia	Mongolia	Early Campanian	Late Cretaceous	Adult?	Left	pmx1	Mesial	3.74	1.49	6.19	7.29	0.398396	1.65508	3.22	1.65	0.512422	/	/	/	0	absent	absent	5	absent	?	?	?	?	?	?		/			35
980	Velociraptor	Velociraptor mesial	Dromaeosauridae	Dromaeosauridae Mesial	AMNH 6515	pmx4	mongoliensis	Hendrickx et al., 2015	Djadochta Formation	Shabarakh Usu	Central Mongolia	Mongolia	Early Campanian	Late Cretaceous	Adult?	Left	pmx4	Mesial	3.89	1.76	5.9	6.26	0.452442	1.51671	2.68	1.05	0.391791	/	/	/	0	absent	absent	absent	absent	?	?	?	?	?	?		/			30
981	Velociraptor	Velociraptor lateral	Dromaeosauridae	Dromaeosauridae Lateral	AMNH 6515	mx04	mongoliensis	Hendrickx et al., 2015	Djadochta Formation	Shabarakh Usu	Central Mongolia	Mongolia	Early Campanian	Late Cretaceous	Adult?	Left	mx04	Lateral	4.75	1.8	7.89	9.56	0.378947	1.66105	3.83	1.52	0.396867	/	/	/	0	absent	absent	absent	absent	?	?	?	?	?	?		/			30
982	Velociraptor	Velociraptor mesial	Dromaeosauridae	Dromaeosauridae Mesial	AMNH 6515	dt01	mongoliensis	Hendrickx et al., 2015	Djadochta Formation	Shabarakh Usu	Central Mongolia	Mongolia	Early Campanian	Late Cretaceous	Adult?	Left	dt01	Mesial	2.74	1.17	5.12	5.66	0.427007	1.86861	2.32	0.94	0.405172	/	/	/	0	absent	absent	absent	absent	?	?	?	?	?	?		/			32.5
983	Velociraptor	Velociraptor lateral	Dromaeosauridae	Dromaeosauridae Lateral	AMNH 6515	mx05	mongoliensis	Hendrickx et al., 2015	Djadochta Formation	Shabarakh Usu	Central Mongolia	Mongolia	Early Campanian	Late Cretaceous	Adult?	Right	mx05	Lateral	4.54	1.99	7.95	10.16	0.438326	1.7511	2.11	?	?	/	/	/	0	absent	absent	absent	absent	?	?	?	?	?	?		/			?
984	Velociraptor	Velociraptor lateral	Dromaeosauridae	Dromaeosauridae Lateral	AMNH 6515	mx08	mongoliensis	Hendrickx et al., 2015	Djadochta Formation	Shabarakh Usu	Central Mongolia	Mongolia	Early Campanian	Late Cretaceous	Adult?	Right	mx08	Lateral	4.26	1.74	7.81	9.3	0.408451	1.83333	3.4	1.69	0.497059	/	/	/	0	absent	absent	absent	absent	?	?	?	?	?	?		/			27.5
985	Velociraptor	Velociraptor lateral	Dromaeosauridae	Dromaeosauridae Lateral	AMNH 6518	mx first	mongoliensis	Young et al., 2019 (C.H. pers. measurements)	Djadochta Formation	Shabarakh Usu	Central Mongolia	Mongolia	Early Campanian	Late Cretaceous	Adult?	Right	mx first	Lateral	5.15	1.97	7.29	8.84	0.382524	1.41553	?	?	?	?	?	?	?	?	?	absent	absent	?	?	?	?	?	?	30	/	/	25	25	27.5	31.25	25.83
986	Velociraptor	Velociraptor lateral	Dromaeosauridae	Dromaeosauridae Lateral	AMNH 6518	mx second	mongoliensis	Young et al., 2019 (C.H. pers. measurements)	Djadochta Formation	Shabarakh Usu	Central Mongolia	Mongolia	Early Campanian	Late Cretaceous	Adult?	Right	mx second	Lateral	5.35	1.9	7.74	8.47	0.35514	1.44673	?	?	?	?	?	?	?	?	?	absent	absent	?	?	?	?	?	?	/	/	/	22.5	25	32.5	/	26.66
987	Velociraptor	Velociraptor lateral	Dromaeosauridae	Dromaeosauridae Lateral	AMNH 6518	mx fourth	mongoliensis	Young et al., 2019 (C.H. pers. measurements)	Djadochta Formation	Shabarakh Usu	Central Mongolia	Mongolia	Early Campanian	Late Cretaceous	Adult?	Right	mx fourth	Lateral	4.61	1.63	5.53	6.26	0.353579	1.19957	?	?	?	?	?	?	?	?	?	absent	absent	?	?	?	?	?	?	41.25	/	/	26.25	25	27.5	41.25	26.25
988	Velociraptor	Velociraptor lateral	Dromaeosauridae	Dromaeosauridae Lateral	AMNH 6518	mx fifth	mongoliensis	Young et al., 2019 (C.H. pers. measurements)	Djadochta Formation	Shabarakh Usu	Central Mongolia	Mongolia	Early Campanian	Late Cretaceous	Adult?	Right	mx fifth	Lateral	4.24	1.7	4.9	6.73	0.400943	1.15566	?	?	?	?	?	?	?	?	?	absent	absent	?	?	?	?	?	?	41.66	/	/	30	30	35	41.66	31.66
989	Velociraptor	Velociraptor mesial	Dromaeosauridae	Dromaeosauridae Mesial	AMNH 6515	pm01	mongoliensis	Smith et al., 2005	Djadochta Formation	Shabarakh Usu	Central Mongolia	Mongolia	Early Campanian	Late Cretaceous	Adult?	Left	pm01	Mesial	3.55	1.54	5.85	6.79	0.433803	1.64789	?	?	?	?	?	?	?	?	?	?	?	?	?	?	?	46.51	-0.001	/	30	/	30	?	/	30	30
990	Velociraptor	Velociraptor mesial	Dromaeosauridae	Dromaeosauridae Mesial	AMNH 6515	pm03	mongoliensis	Smith et al., 2005	Djadochta Formation	Shabarakh Usu	Central Mongolia	Mongolia	Early Campanian	Late Cretaceous	Adult?	Left	pm03	Mesial	3.3	1.54	4.38	5.88	0.466667	1.32727	?	?	?	?	?	?	?	?	?	?	?	?	?	?	?	23.87	-0.574	/	30	/	30	?	/	30	30
991	Velociraptor	Velociraptor lateral	Dromaeosauridae	Dromaeosauridae Lateral	AMNH 6515	mx02	mongoliensis	Smith et al., 2005	Djadochta Formation	Shabarakh Usu	Central Mongolia	Mongolia	Early Campanian	Late Cretaceous	Adult?	Right	mx02	Lateral	4.17	1.45	6.7	8.42	0.347722	1.60671	?	?	?	?	?	?	?	?	?	?	?	?	?	?	?	51.72	0.038	/	/	/	25	27.5	35	/	29.2
992	Velociraptor	Velociraptor lateral	Dromaeosauridae	Dromaeosauridae Lateral	AMNH 6515	mx04	mongoliensis	Smith et al., 2005	Djadochta Formation	Shabarakh Usu	Central Mongolia	Mongolia	Early Campanian	Late Cretaceous	Adult?	Right	mx04	Lateral	4.35	2.15	7.91	9.54	0.494253	1.81839	?	?	?	?	?	?	?	?	?	?	?	?	?	?	?	57.85	0.152	/	37.5	/	/	30	/	37.5	30
993	Velociraptor	Velociraptor lateral	Dromaeosauridae	Dromaeosauridae Lateral	AMNH 6515	mx06	mongoliensis	Smith et al., 2005	Djadochta Formation	Shabarakh Usu	Central Mongolia	Mongolia	Early Campanian	Late Cretaceous	Adult?	Right	mx06	Lateral	3.95	1.61	6.93	9.09	0.407595	1.75443	?	?	?	?	?	?	?	?	?	?	?	?	?	?	?	51.05	0.045	/	37.5	/	25	25	35	37.5	28.3
994	Velociraptor	Velociraptor lateral	Dromaeosauridae	Dromaeosauridae Lateral	AMNH 6515	mx08	mongoliensis	Smith et al., 2005	Djadochta Formation	Shabarakh Usu	Central Mongolia	Mongolia	Early Campanian	Late Cretaceous	Adult?	Right	mx08	Lateral	3.11	0.8	4.69	5.08	0.257235	1.50804	?	?	?	?	?	?	?	?	?	?	?	?	?	?	?	35.07	-0.24	/	40	/	27.5	30	/	40	28.8
995	Velociraptor	Velociraptor mesial	Dromaeosauridae	Dromaeosauridae Mesial	AMNH 6515	d01	mongoliensis	Smith et al., 2005	Djadochta Formation	Shabarakh Usu	Central Mongolia	Mongolia	Early Campanian	Late Cretaceous	Adult?	Left	d01	Mesial	2.42	1.17	4.25	5.03	0.483471	1.7562	?	?	?	?	?	?	?	?	?	?	?	?	?	?	?	13.62	-0.949	/	/	/	32.2	30	/	/	31.1
996	Velociraptor	Velociraptor mesial	Dromaeosauridae	Dromaeosauridae Mesial	uncat, GIN	mx01	indet.	Smith et al., 2005	Djadochta Formation	?	Central Mongolia	Mongolia	Early Campanian	Late Cretaceous	?	Left	mx01	Lateral	4.47	2.79	7.62	9.2	0.624161	1.7047	?	?	?	?	?	?	?	?	?	?	?	?	?	?	?	57.08	0.114	/	/	/	/	25	/	/	25
997	Velociraptor	Velociraptor lateral	Dromaeosauridae	Dromaeosauridae Lateral	uncat, GIN	mx03	indet.	Smith et al., 2005	Djadochta Formation	?	Central Mongolia	Mongolia	Early Campanian	Late Cretaceous	?	Left	mx03	Lateral	6.14	2.46	9.85	12.49	0.400651	1.60423	?	?	?	?	?	?	?	?	?	?	?	?	?	?	?	64.98	0.122	/	/	/	20	25	22.5	/	22.5
998	Velociraptor	Velociraptor lateral	Dromaeosauridae	Dromaeosauridae Lateral	uncat, GIN	mx05	indet.	Smith et al., 2005	Djadochta Formation	?	Central Mongolia	Mongolia	Early Campanian	Late Cretaceous	?	Left	mx05	Lateral	5.99	2.4	9.93	12.87	0.400668	1.65776	?	?	?	?	?	?	?	?	?	?	?	?	?	?	?	64.66	0.147	/	/	/	25	20	35	/	26.7
999	Velociraptor	Velociraptor lateral	Dromaeosauridae	Dromaeosauridae Lateral	uncat, GIN	mx06	indet.	Smith et al., 2005	Djadochta Formation	?	Central Mongolia	Mongolia	Early Campanian	Late Cretaceous	?	Left	mx06	Lateral	4.72	1.55	6.8	9.13	0.32839	1.44068	?	?	?	?	?	?	?	?	?	?	?	?	?	?	?	52.81	0.005	/	/	/	/	22.5	27.5	/	25
1000	Velociraptor	Velociraptor lateral	Dromaeosauridae	Dromaeosauridae Lateral	uncat, GIN	mx05	indet.	Smith et al., 2005	Djadochta Formation	?	Central Mongolia	Mongolia	Early Campanian	Late Cretaceous	?	Right	mx05	Lateral	4.69	1.98	9.44	10.31	0.422175	2.01279	?	?	?	?	?	?	?	?	?	?	?	?	?	?	?	64.86	0.198	/	/	/	21.3	?	/	/	21.3
1001	Velociraptor	Velociraptor lateral	Dromaeosauridae	Dromaeosauridae Lateral	uncat, GIN	mx08	indet.	Smith et al., 2005	Djadochta Formation	?	Central Mongolia	Mongolia	Early Campanian	Late Cretaceous	?	Right	mx08	Lateral	4.59	2	9.25	10.53	0.43573	2.01525	?	?	?	?	?	?	?	?	?	?	?	?	?	?	?	63.35	0.194	/	/	/	22.5	25	/	/	23.4
1002	Richardoestesia	Richardoestesia lateral	Dromaeosauridae	Dromaeosauridae Lateral	TMP 1986.159.0062	Isolated	isosceles	Sankey et al., 2002	Oldman Formation	?	Alberta	Canada	Middle Campanian (77-76 Ma)	Late Cretaceous	?	/	Isolated	Lateral	3.5	1.5	7.5	?	0.428571	2.14286	?	?	?	?	?	?	?	?	?	?	?	?	?	?	?	?	?	?		?	?	32.5	?		6.5
1003	Richardoestesia	Richardoestesia lateral	Dromaeosauridae	Dromaeosauridae Lateral	TMP 1990.079.0031	Isolated	isosceles	Sankey et al., 2002	Oldman Formation	?	Alberta	Canada	Middle Campanian (77-76 Ma)	Late Cretaceous	?	/	Isolated	Lateral	2.8	1.3	6.8	?	0.464286	2.42857	?	?	?	?	?	?	?	?	?	?	?	?	?	?	?	?	?	?		?	?	40	?		8
1004	Richardoestesia	Richardoestesia lateral	Dromaeosauridae	Dromaeosauridae Lateral	TMP 1995.177.0049a	Isolated	isosceles	Sankey et al., 2002	Oldman Formation	?	Alberta	Canada	Middle Campanian (77-76 Ma)	Late Cretaceous	?	/	Isolated	Lateral	3.2	1.2	8.5	?	0.375	2.65625	?	?	?	?	?	?	?	?	?	?	?	?	?	?	?	?	?	?		?	?	50	?		10
1005	Richardoestesia	Richardoestesia lateral	Dromaeosauridae	Dromaeosauridae Lateral	TMP 1995.180.0005a	Isolated	isosceles	Sankey et al., 2002	Oldman Formation	?	Alberta	Canada	Middle Campanian (77-76 Ma)	Late Cretaceous	?	/	Isolated	Lateral	1.9	0.9	5.2	?	0.473684	2.73684	?	?	?	?	?	?	?	?	?	?	?	?	?	?	?	?	?	?		?	?	60	?		12
1006	Richardoestesia	Richardoestesia lateral	Dromaeosauridae	Dromaeosauridae Lateral	TMP 1995.180.0005b	Isolated	isosceles	Sankey et al., 2002	Oldman Formation	?	Alberta	Canada	Middle Campanian (77-76 Ma)	Late Cretaceous	?	/	Isolated	Lateral	1.7	0.9	4.2	?	0.529412	2.47059	?	?	?	?	?	?	?	?	?	?	?	?	?	?	?	?	?	?		?	?	0	?
1007	Richardoestesia	Richardoestesia lateral	Dromaeosauridae	Dromaeosauridae Lateral	TMP 1996.048.0011	Isolated	isosceles	Sankey et al., 2002	Oldman Formation	?	Alberta	Canada	Middle Campanian (77-76 Ma)	Late Cretaceous	?	/	Isolated	Lateral	2.5	1.3	5	?	0.52	2	?	?	?	?	?	?	?	?	?	?	?	?	?	?	?	?	?	?		?	?	40	?		8
1008	Richardoestesia	Richardoestesia lateral	Dromaeosauridae	Dromaeosauridae Lateral	TMP 1996.062.0030a	Isolated	isosceles	Sankey et al., 2002	Oldman Formation	?	Alberta	Canada	Middle Campanian (77-76 Ma)	Late Cretaceous	?	/	Isolated	Lateral	3.6	1.7	12.5	?	0.472222	3.47222	?	?	?	?	?	?	?	?	?	?	?	?	?	?	?	?	?	?		?	?	30	?		6
1009	Richardoestesia	Richardoestesia lateral	Dromaeosauridae	Dromaeosauridae Lateral	TMP 1989.103.0025	Isolated	isosceles	Sankey et al., 2002	Oldman Formation	?	Alberta	Canada	Middle Campanian (77-76 Ma)	Late Cretaceous	?	/	Isolated	Lateral	3.9	2.5	5.4	?	0.641026	1.38462	?	?	?	?	?	?	?	?	?	?	?	?	?	?	?	?	?	?		?	?	37.5	?		7.5
1010	Richardoestesia	Richardoestesia lateral	Dromaeosauridae	Dromaeosauridae Lateral	TMP 1995.177.0079	Isolated	isosceles	Sankey et al., 2002	Oldman Formation	?	Alberta	Canada	Middle Campanian (77-76 Ma)	Late Cretaceous	?	/	Isolated	Lateral	1.9	0.7	3	?	0.368421	1.57895	?	?	?	?	?	?	?	?	?	?	?	?	?	?	?	?	?	?		?	?	60	?		12
1011	Richardoestesia	Richardoestesia lateral	Dromaeosauridae	Dromaeosauridae Lateral	TMP 1986.172.0053	Isolated	isosceles	Sankey et al., 2002	Oldman Formation	?	Alberta	Canada	Middle Campanian (77-76 Ma)	Late Cretaceous	?	/	Isolated	Lateral	1.9	0.7	2.9	?	0.368421	1.52632	?	?	?	?	?	?	?	?	?	?	?	?	?	?	?	?	?	?		?	?	60	?		12
1012	Richardoestesia	Richardoestesia lateral	Dromaeosauridae	Dromaeosauridae Lateral	TMP 1984.001.0012	Isolated	isosceles	Sankey et al., 2002	Dinosaur Park Formation	?	Alberta	Canada	Middle Campanian (76-75 Ma)	Late Cretaceous	?	/	Isolated	Lateral	4.5	2.1	11	?	0.466667	2.44444	?	?	?	?	?	?	?	?	?	?	?	?	?	?	?	?	?	?		?	?	30	?		6
1013	Richardoestesia	Richardoestesia lateral	Dromaeosauridae	Dromaeosauridae Lateral	TMP 1986.023.0105	Isolated	isosceles	Sankey et al., 2002	Dinosaur Park Formation	?	Alberta	Canada	Middle Campanian (76-75 Ma)	Late Cretaceous	?	/	Isolated	Lateral	2.3	1.1	5.8	?	0.478261	2.52174	?	?	?	?	?	?	?	?	?	?	?	?	?	?	?	?	?	?		?	?	42.5	?		8.5
1014	Richardoestesia	Richardoestesia lateral	Dromaeosauridae	Dromaeosauridae Lateral	TMP 1986.033.0054	Isolated	isosceles	Sankey et al., 2002	Dinosaur Park Formation	?	Alberta	Canada	Middle Campanian (76-75 Ma)	Late Cretaceous	?	/	Isolated	Lateral	2.1	1.1	4.5	?	0.52381	2.14286	?	?	?	?	?	?	?	?	?	?	?	?	?	?	?	?	?	?		?	?	40	?		8
1015	Richardoestesia	Richardoestesia lateral	Dromaeosauridae	Dromaeosauridae Lateral	TMP 1986.045.0046	Isolated	isosceles	Sankey et al., 2002	Dinosaur Park Formation	?	Alberta	Canada	Middle Campanian (76-75 Ma)	Late Cretaceous	?	/	Isolated	Lateral	2.3	1.2	5.5	?	0.521739	2.3913	?	?	?	?	?	?	?	?	?	?	?	?	?	?	?	?	?	?		?	?	50	?		10
1016	Richardoestesia	Richardoestesia lateral	Dromaeosauridae	Dromaeosauridae Lateral	TMP 1988.036.0199	Isolated	isosceles	Sankey et al., 2002	Dinosaur Park Formation	?	Alberta	Canada	Middle Campanian (76-75 Ma)	Late Cretaceous	?	/	Isolated	Lateral	3.7	1.7	9.5	?	0.459459	2.56757	?	?	?	?	?	?	?	?	?	?	?	?	?	?	?	?	?	?		?	?	35	?		7
1017	Richardoestesia	Richardoestesia lateral	Dromaeosauridae	Dromaeosauridae Lateral	TMP 1995.181.0010	Isolated	isosceles	Sankey et al., 2002	Dinosaur Park Formation	?	Alberta	Canada	Middle Campanian (76-75 Ma)	Late Cretaceous	?	/	Isolated	Lateral	3	1.6	7.2	?	0.533333	2.4	?	?	?	?	?	?	?	?	?	?	?	?	?	?	?	?	?	?		?	?	35	?		7
1018	Richardoestesia	Richardoestesia lateral	Dromaeosauridae	Dromaeosauridae Lateral	TMP 1996.142.0019	Isolated	isosceles	Sankey et al., 2002	Dinosaur Park Formation	?	Alberta	Canada	Middle Campanian (76-75 Ma)	Late Cretaceous	?	/	Isolated	Lateral	3.1	1.5	9.7	?	0.483871	3.12903	?	?	?	?	?	?	?	?	?	?	?	?	?	?	?	?	?	?		?	?	35	?		7
1019	Richardoestesia	Richardoestesia lateral	Dromaeosauridae	Dromaeosauridae Lateral	TMP 1987.158.0076	Isolated	isosceles	Sankey et al., 2002	Dinosaur Park Formation	?	Alberta	Canada	Middle Campanian (76-75 Ma)	Late Cretaceous	?	/	Isolated	Lateral	2.4	0.8	3.3	?	0.333333	1.375	?	?	?	?	?	?	?	?	?	?	?	?	?	?	?	?	?	?		?	?	50	?		10
[truncated: 352 more rows]
[truncated: 11 more columns]

## Sheet: Data
	Taxa (Genus)	Taxon + Tooth type	Clade	Clade + Tooth type	Specimen	Position	(Species)	Source	Formation	Locality	Region	Country	Age	Epoch	Maturity	Side	Position	Type	CBL	CBW	CH	AL	CBR	CHR	MCL	MCW	MCR	MDE	MSL	MEC	CTU	Transv. Undu.	Interdent. sulci	LAF	LIF	DMT	DDT	DLAT	DLIT	CA	CA2	MA	MC	MB	DA	DC	DB	MAVG	DAVG
[truncated: 1,371 more rows]
[truncated: 11 more columns]

[truncated: 8 more sheets: Whole dataset, Results, Kem Kem teeth, Whole large theropods, Pers. dataset, Pers. large theropods, Examined material, RBINS specimens]
